# Supplementary material for: Sources of SARS-CoV-2 and Other Microorganisms in Dental Aerosols
Source: PubMed Central journal article supplement (PMC8258727; doi:10.1177/00220345211015948), 2021-05-12
Supplement: sj-pdf-1-jdr-10.1177_00220345211015948.pdf [file sj-pdf-1-jdr-10.1177_00220345211015948.pdf]

**Supplemental Table 1: Relative abundances of taxa in condensate deposited on the assistant, environment, operator and patient. ASVs were assigned taxonomic identity using Naive Bayes classifiers (QIIME2 q2-feature-classifier) trained for each primer pair by extracting the corresponding hypervariable region from the SILVA database (as of November 12,2020).**

| Ultrasound                                       |                                |                         |                                                        |                         |                         |                                                  |                           |                         |                                                  |                         |                         |                                                    |                         |                         |                                                |                         |                         |  |
|--------------------------------------------------|--------------------------------|-------------------------|--------------------------------------------------------|-------------------------|-------------------------|--------------------------------------------------|---------------------------|-------------------------|--------------------------------------------------|-------------------------|-------------------------|----------------------------------------------------|-------------------------|-------------------------|------------------------------------------------|-------------------------|-------------------------|--|
| Assistant                                        |                                |                         | Environment                                            |                         |                         |                                                  | Operator                  |                         |                                                  | Patient                 |                         |                                                    | Saliva                  |                         |                                                | Waterline               |                         |  |
| Taxon ID                                         | Mean relative abundance        | Std dev                 | Taxon ID                                               | Mean relative abundance | Std dev                 | Taxon ID                                         | Mean relative abundance   | Std dev                 | Taxon ID                                         | Mean relative abundance | Std dev                 | Taxon ID                                           | Mean relative abundance | Std dev                 | Taxon ID                                       | Mean relative abundance | Std dev                 |  |
| Uncultured_Vulcanibacterium                      | 0.88<br>613<br>444<br>5        | 0.03<br>679<br>586<br>3 | Uncultured_Vulcanibacterium                            | 0.91<br>567<br>28       | 0.03<br>525<br>360<br>8 | Uncultured_Vulcanibacterium                      | 0.41<br>557<br>193<br>3   | 0.02<br>640<br>600<br>7 | Uncultured_Vulcanibacterium                      | 0.51<br>822<br>114<br>8 | 0.03<br>163<br>234<br>4 | ASV_346                                            | 0.01<br>835<br>883<br>2 | 0.00<br>328<br>397<br>2 | Uncultured_Vulcanibacterium                    | 0.08<br>220<br>780<br>1 | 0.00<br>293<br>293<br>5 |  |
| Uncultured_Vulcanibacterium                      | 0.75<br>044<br>865<br>374<br>7 | 0.02<br>749<br>7        | Uncultured_Vulcanibacterium                            | 0.81<br>725<br>418<br>2 | 0.03<br>676<br>075<br>5 | Uncultured_Vulcanibacterium                      | 0.38<br>201<br>711<br>7   | 0.02<br>596<br>621      | Uncultured_Vulcanibacterium                      | 0.45<br>526<br>015<br>8 | 0.02<br>562<br>199<br>6 | ASV_305                                            | 0.01<br>593<br>662<br>7 | 0.00<br>292<br>826<br>2 | Uncultured_Vulcanibacterium                    | 0.07<br>973<br>372<br>3 | 0.00<br>689<br>508<br>4 |  |
| Schlegellella_uncultured_bacterium               | 0.08<br>015<br>587<br>1        | 0.00<br>843             | Schlegellella_uncultured_bacterium                     | 0.06<br>120<br>397<br>2 | 0.00<br>638<br>549<br>7 | Treponema_denticola                              | 0.04<br>844<br>047<br>585 | 0.00<br>800<br>246<br>5 | Treponema_denticola                              | 0.02<br>969<br>573<br>3 | 0.00<br>731<br>814<br>4 | Solobacterium_moorei                               | 0.01<br>011<br>037<br>8 | 0.00<br>070<br>320<br>7 | C1-B045_uncultured_gamma                       | 0.07<br>517<br>976<br>8 | 0.00<br>508<br>508<br>1 |  |
| Rhodococcus_erythropolis                         | 0.01<br>527<br>579<br>5        | 0.00<br>078<br>122      | Rhodococcus_erythropolis                               | 0.00<br>979<br>544<br>3 | 0.00<br>071<br>727<br>3 | Schlegellella_uncultured_bacterium               | 0.02<br>951<br>901<br>7   | 0.00<br>337<br>078<br>3 | ASV_256                                          | 0.02<br>877<br>705<br>7 | 0.00<br>669<br>402<br>2 | Rothia_aeria                                       | 0.00<br>882<br>458<br>8 | 0.00<br>075<br>925<br>5 | ASV_144                                        | 0.06<br>569<br>833<br>9 | 0.00<br>853<br>037      |  |
| Brevundimonas_diminuta                           | 0.00<br>704<br>342<br>2        | 0.00<br>060<br>204<br>3 | Acetobacteraceae_uncultured_alpha_protobacterium       | 0.00<br>814<br>652<br>8 | 0.00<br>074<br>392<br>8 | Streptococcus_mutans                             | 0.01<br>628<br>022<br>3   | 0.00<br>365<br>863<br>7 | ASV_292                                          | 0.02<br>070<br>141<br>5 | 0.00<br>433<br>679<br>9 | Treponema_denticola                                | 0.00<br>677<br>994<br>4 | 0.00<br>088<br>406<br>8 | Denitratisoma_sp.                              | 0.05<br>914<br>566<br>3 | 0.00<br>369<br>724<br>1 |  |
| Acetobacteraceae_uncultured_alpha_protobacterium | 0.00<br>527<br>126<br>8        | 0.00<br>048<br>991<br>4 | ASV_292                                                | 0.00<br>175<br>591<br>8 | 0.00<br>175<br>149<br>8 | Rhodococcus_erythropolis                         | 0.01<br>244<br>818<br>9   | 0.00<br>153<br>896<br>6 | Schlegellella_uncultured_bacterium               | 0.01<br>335<br>560<br>5 | 0.00<br>149<br>017      | Filifactor_sp.                                     | 0.00<br>622<br>36<br>3  | 0.00<br>099<br>116      | ASV_164                                        | 0.05<br>319<br>775<br>7 | 0.00<br>745<br>406<br>5 |  |
| ASV_363                                          | 0.00<br>517<br>377<br>4        | 0.00<br>069<br>265<br>9 | ASV_256                                                | 0.00<br>698<br>971<br>8 | 0.00<br>165<br>613<br>2 | Actinomyces_israelii                             | 0.00<br>929<br>850<br>7   | 0.00<br>141<br>301<br>6 | Rhodococcus_erythropolis                         | 0.01<br>483<br>160<br>7 | 0.00<br>692             | Leptotrichia_wadei                                 | 0.00<br>602<br>845<br>8 | 0.00<br>084<br>124<br>8 | Desulfobacterota_uncultured_Desulfuromonadales | 0.03<br>410<br>201<br>5 | 0.00<br>431<br>96       |  |
| ASV_1208                                         | 0.00<br>479<br>376<br>3        | 0.00<br>049<br>957<br>6 | Brevundimonas_diminuta                                 | 0.00<br>645<br>233<br>3 | 0.00<br>076<br>102<br>2 | Cryptobacterium_sp.                              | 0.00<br>834<br>462<br>4   | 0.00<br>149<br>132<br>3 | Streptococcus_mutans                             | 0.01<br>421<br>767<br>1 | 0.00<br>217<br>395<br>8 | Prevotella_micans                                  | 0.00<br>543<br>332<br>4 | 0.00<br>117<br>830<br>5 | ASV_211                                        | 0.01<br>536<br>876<br>9 | 0.00<br>175<br>181<br>2 |  |
| ASV_366                                          | 0.00<br>453<br>827<br>9        | 0.00<br>060<br>415<br>8 | Rothia_aeria                                           | 0.00<br>609<br>062<br>3 | 0.00<br>099<br>560<br>2 | Brevundimonas_diminuta                           | 0.00<br>795<br>679<br>9   | 0.00<br>062<br>252<br>8 | Rothia_aeria                                     | 0.01<br>201<br>343<br>6 | 0.00<br>139<br>275<br>3 | Prevotella_nigrescens                              | 0.00<br>533<br>179<br>3 | 0.00<br>061<br>338<br>1 | Thioclava_uncultured_bacterium                 | 0.01<br>383<br>938<br>5 | 0.00<br>309<br>248<br>3 |  |
| Lactobacillus_coryniformis                       | 0.00<br>445<br>536<br>9        | 0.00<br>115<br>037<br>1 | ASV_366                                                | 0.00<br>583<br>140<br>7 | 0.00<br>143<br>051<br>8 | ASV_476                                          | 0.00<br>687<br>488<br>1   | 0.00<br>350<br>149<br>7 | Prevotella_nigrescens                            | 0.00<br>833<br>249<br>8 | 0.00<br>148<br>259<br>5 | Streptococcus_mutans                               | 0.00<br>490<br>256<br>7 | 0.00<br>096<br>210<br>1 | Obscuribacteraceae_sp.                         | 0.01<br>006<br>318<br>3 | 0.00<br>095<br>393<br>7 |  |
| ASV_720                                          | 0.00<br>406<br>149<br>3        | 0.00<br>032<br>097<br>8 | ASV_363                                                | 0.00<br>581<br>366<br>4 | 0.00<br>142<br>594<br>3 | Jonquetella_anthropi                             | 0.00<br>559<br>539<br>3   | 0.00<br>105<br>324<br>3 | Acetobacteraceae_uncultured_alpha_protobacterium | 0.00<br>726<br>515<br>8 | 0.00<br>070<br>440<br>4 | Butyrivibrio_Eubacterium_sp.                       | 0.00<br>453<br>928<br>5 | 0.00<br>066<br>928<br>5 | ASV_800                                        | 0.00<br>982<br>428<br>6 | 0.00<br>142<br>323<br>6 |  |
| Corynebacterium_propinquum                       | 0.00<br>346<br>036<br>4        | 0.00<br>082<br>635      | Chloroplast_Cinnamomum_camphora                        | 0.00<br>568<br>761<br>8 | 0.00<br>146<br>853<br>7 | ASV_256                                          | 0.00<br>489<br>185<br>7   | 0.00<br>072<br>013      | Brevundimonas_diminuta                           | 0.00<br>722<br>882<br>3 | 0.00<br>072<br>723<br>3 | ASV_256                                            | 0.00<br>388<br>722<br>8 | 0.00<br>044<br>607<br>4 | ASV_621                                        | 0.00<br>857<br>196<br>6 | 0.00<br>160<br>759<br>4 |  |
| ASV_709                                          | 0.00<br>345<br>878<br>5        | 0.00<br>039<br>141<br>4 | ASV_709                                                | 0.00<br>562<br>565<br>1 | 0.00<br>082<br>394      | ASV_305                                          | 0.00<br>484<br>635<br>7   | 0.00<br>093<br>7        | ASV_305                                          | 0.00<br>563<br>395<br>1 | 0.00<br>118<br>234<br>5 | Prevotella_baroniae                                | 0.00<br>377<br>044<br>1 | 0.00<br>045<br>829<br>6 | ASV_897                                        | 0.00<br>796<br>932<br>3 | 0.00<br>091<br>940<br>8 |  |
| ASV_292                                          | 0.00<br>319<br>165<br>5        | 0.00<br>049<br>052<br>5 | ASV_3352                                               | 0.00<br>507<br>464<br>2 | 0.00<br>108<br>872<br>5 | ASV_292                                          | 0.00<br>464<br>438<br>8   | 0.00<br>071<br>15       | Treponema_maltophilum                            | 0.00<br>463<br>495<br>1 | 0.00<br>116<br>846<br>1 | ASV_292                                            | 0.00<br>360<br>066<br>4 | 0.00<br>042<br>303<br>4 | Singulisphaera_Isospaera_sp.                   | 0.00<br>645<br>665<br>6 | 0.00<br>078<br>996<br>7 |  |
| Dehalococcoides_RBG-13-46-9_sp.                  | 0.00<br>311<br>603<br>1        | 0.00<br>080<br>455<br>6 | ASV_720                                                | 0.00<br>498<br>194<br>4 | 0.00<br>055<br>828      | Rothia_aeria                                     | 0.00<br>446<br>962<br>7   | 0.00<br>030<br>223      | ASV_709                                          | 0.00<br>459<br>996<br>8 | 0.00<br>056<br>787<br>4 | Peptococcus_sp.                                    | 0.00<br>338<br>196<br>6 | 0.00<br>052<br>879<br>5 | Simkaniaceae_uncultured_Candidatus             | 0.00<br>622<br>852<br>6 | 0.00<br>084<br>428      |  |
| Methylophilaceae_sp.                             | 0.00<br>307<br>266<br>9        | 0.00<br>079<br>336      | Corynebacterium_mycetoides                             | 0.00<br>396<br>108<br>7 | 0.00<br>102<br>274      | ASV_678                                          | 0.00<br>403<br>631<br>4   | 0.00<br>079<br>1        | ASV_346                                          | 0.00<br>439<br>711<br>9 | 0.00<br>071<br>226<br>3 | Clostridia_vadinBB60_group_Clostridiales_bacterium | 0.00<br>283<br>070<br>8 | 0.00<br>045<br>694<br>6 | ASV_1021                                       | 0.00<br>609<br>378<br>6 | 0.00<br>068<br>984<br>7 |  |
| Lawsonella_uncultured_bacterium                  | 0.00<br>293<br>403<br>7        | 0.00<br>048<br>909<br>3 | Lactobacillales_sp.                                    | 0.00<br>346<br>692<br>6 | 0.00<br>089<br>515<br>6 | Acetobacteraceae_uncultured_alpha_protobacterium | 0.00<br>388<br>649<br>8   | 0.00<br>041<br>64       | ASV_513                                          | 0.00<br>432<br>170<br>9 | 0.00<br>111<br>585<br>9 | Campylobacter_conciscus                            | 0.00<br>279<br>349<br>3 | 0.00<br>070<br>532<br>1 | Edaphobaculum_uncultured_Chitinophagaceae      | 0.00<br>515<br>461<br>9 | 0.00<br>049<br>446<br>9 |  |
| ASV_6154                                         | 0.00<br>278<br>820<br>4        | 0.00<br>071<br>991<br>4 | Oscillospiraceae_NK4A214_group_metagenome              | 0.00<br>318<br>957<br>1 | 0.00<br>082<br>354<br>4 | Lawsonella_uncultured_bacterium                  | 0.00<br>365<br>284<br>6   | 0.00<br>053<br>581<br>9 | Leptotrichia_wadei                               | 0.00<br>427<br>080<br>8 | 0.00<br>075<br>083<br>3 | Eubacterium_minutum                                | 0.00<br>188<br>358<br>7 | 0.00<br>045<br>197<br>4 | Legionellaceae_uncultured_Legionella_sp.       | 0.00<br>513<br>260<br>2 | 0.00<br>114<br>816<br>3 |  |
| ASV_8581                                         | 0.00<br>276<br>540<br>2        | 0.00<br>071<br>402<br>4 | ASV_6187                                               | 0.00<br>315<br>757<br>4 | 0.00<br>061<br>592<br>2 | ASV_709                                          | 0.00<br>340<br>454<br>1   | 0.00<br>029<br>383<br>1 | ASV_366                                          | 0.00<br>402<br>609<br>6 | 0.00<br>071<br>097<br>9 | Actinomycetaceae_F0332unidentified                 | 0.00<br>182<br>097<br>9 | 0.00<br>018<br>731<br>5 | ASV_413                                        | 0.00<br>479<br>215<br>7 | 0.00<br>102<br>221<br>5 |  |
| Isosphaera_sp.                                   | 0.00<br>276<br>540<br>2        | 0.00<br>071<br>402<br>4 | Cellvibrio_uncultured_Cellvibrio                       | 0.00<br>306<br>119<br>9 | 0.00<br>044<br>521<br>9 | ASV_346                                          | 0.00<br>338<br>516<br>9   | 0.00<br>056<br>757<br>5 | ASV_363                                          | 0.00<br>396<br>754<br>5 | 0.00<br>071<br>506<br>5 | ASV_1443                                           | 0.00<br>178<br>647<br>7 | 0.00<br>046<br>126<br>6 | Amb-16S-1323_uncultured_bacterium              | 0.00<br>371<br>012<br>4 | 0.00<br>045<br>913      |  |
| Chloroplast_Melosira_varians                     | 0.00<br>275<br>94              | 0.00<br>048<br>906<br>6 | Dermatophilaceae_uncultured_bacterium                  | 0.00<br>299<br>966<br>7 | 0.00<br>077<br>451<br>1 | ASV_513                                          | 0.00<br>335<br>055<br>1   | 0.00<br>086<br>510<br>9 | Actinomyces_israelii                             | 0.00<br>394<br>667<br>9 | 0.00<br>054<br>947<br>2 | Lachnospiraceae_uncultured_Eubacterium_sp.         | 0.00<br>169<br>405<br>4 | 0.00<br>043<br>740<br>3 | ASV_366                                        | 0.00<br>270<br>028<br>8 | 0.00<br>038<br>821<br>5 |  |
| alphaproteobacteria_uncultured_bacterium         | 0.00<br>269<br>009<br>2        | 0.00<br>067<br>321<br>3 | Lactobacillales_P5D1-392_sp.                           | 0.00<br>288<br>138<br>3 | 0.00<br>074<br>397      | Solobacterium_moorei                             | 0.00<br>290<br>553<br>5   | 0.00<br>038<br>175<br>7 | Ruminococcaceae_uncultured_rumen                 | 0.00<br>371<br>939<br>2 | 0.00<br>096<br>034<br>3 | Streptococcus_anginosus                            | 0.00<br>161<br>816<br>6 | 0.00<br>018<br>099<br>8 | Schlegellella_uncultured_bacterium             | 0.00<br>260<br>942<br>8 | 0.00<br>031<br>195<br>1 |  |
| ASV_3442                                         | 0.00<br>264<br>394<br>8        | 0.00<br>068<br>266<br>4 | Alphaproteobacteria_uncultured_Lactobacterium_aquatile | 0.00<br>261<br>615<br>7 | 0.00<br>067<br>548<br>9 | Amb-16S-1323_uncultured_bacterium                | 0.00<br>280<br>711<br>1   | 0.00<br>072<br>479<br>3 | ASV_4644                                         | 0.00<br>361<br>607<br>6 | 0.00<br>093<br>366<br>7 | Pyramidobacter_piscolenus                          | 0.00<br>149<br>671<br>5 | 0.00<br>036<br>502<br>8 | ASV_363                                        | 0.00<br>231<br>231<br>2 | 0.00<br>034<br>795<br>8 |  |
| Steroidobacteraceae_uncultured_metagenome        | 0.00<br>261<br>176<br>8        | 0.00<br>067<br>435<br>6 | Sandaracinaceae_uncultured_Myrococcoides               | 0.00<br>255<br>527<br>2 | 0.00<br>065<br>976<br>8 | ASV_720                                          | 0.00<br>272<br>044<br>4   | 0.00<br>025<br>062<br>6 | Prevotella_baroniae                              | 0.00<br>361<br>135      | 0.00<br>093<br>244<br>7 | Leptotrichia_hofstadii                             | 0.00<br>148<br>131<br>3 | 0.00<br>028<br>068<br>3 | oc32_uncultured_bacterium                      | 0.00<br>156<br>178<br>3 | 0.00<br>029<br>279<br>7 |  |

|                                                               |                         |                         |                                                                 |                         |                         |                                                                                 |                           |                         |                                                                                |                         |                         |                                                             |                           |                         |                                                           |                         |                                |
|---------------------------------------------------------------|-------------------------|-------------------------|-----------------------------------------------------------------|-------------------------|-------------------------|---------------------------------------------------------------------------------|---------------------------|-------------------------|--------------------------------------------------------------------------------|-------------------------|-------------------------|-------------------------------------------------------------|---------------------------|-------------------------|-----------------------------------------------------------|-------------------------|--------------------------------|
| Citricoccus_sp.                                               | 0.00<br>260<br>100<br>6 | 0.00<br>067<br>157<br>7 | Leptolyngbyaceae_u<br>ncultured_cyanobact<br>erium              | 0.00<br>249<br>618<br>6 | 0.00<br>064<br>451<br>2 | Prevotella_nigrescens                                                           | 0.00<br>263<br>705<br>7   | 0.00<br>033<br>473<br>8 | ASV_476                                                                        | 0.00<br>352<br>023<br>7 | 0.00<br>069<br>326<br>2 | Bacteroides_pyrogenes                                       | 0.00<br>143<br>499<br>8   | 0.00<br>032<br>817<br>8 | Acetobacteraceae_un<br>cultured_alpha_prot<br>eobacterium | 0.00<br>148<br>079<br>7 | 0.00<br>034<br>384<br>3        |
| Tepidimonas_sp.                                               | 0.00<br>248<br>031<br>4 | 0.00<br>045<br>727<br>1 | Ramlibacter_sp.                                                 | 0.00<br>249<br>618<br>6 | 0.00<br>064<br>451<br>2 | Aliterella_uncultured_b<br>acterium                                             | 0.00<br>247<br>941<br>6   | 0.00<br>064<br>018<br>2 | ASV_720                                                                        | 0.00<br>337<br>084<br>6 | 0.00<br>042<br>353<br>3 | Bulleidia_extracta                                          | 0.00<br>141<br>995<br>4   | 0.00<br>027<br>127<br>5 | Rhodococcus_erythro<br>polis                              | 0.00<br>135<br>163<br>4 | 0.00<br>016<br>457<br>4        |
| Chloroplast_Chlorella<br>_heliozoae                           | 0.00<br>247<br>040<br>7 | 0.00<br>063<br>785<br>6 | Paracaeidiabacterace<br>e_sp.                                   | 0.00<br>247<br>921<br>8 | 0.00<br>064<br>013<br>1 | Leptotrichia_hofstadii                                                          | 0.00<br>238<br>426<br>4   | 0.00<br>061<br>561<br>4 | Singulisphaerauncult<br>ured_eubacterium                                       | 0.00<br>299<br>617<br>7 | 0.00<br>077<br>361<br>1 | ASV_1665                                                    | 0.00<br>139<br>811<br>3   | 0.00<br>036<br>099<br>1 | ASV_2649                                                  | 0.00<br>113<br>403<br>7 | 0.00<br>014<br>839<br>6        |
| Bacteroidales_RF16_<br>groupuncultured_Por<br>phyromonadaceae | 0.00<br>245<br>813<br>5 | 0.00<br>063<br>468<br>8 | Oligoflexales_uncultu<br>red_soil                               | 0.00<br>241<br>855<br>5 | 0.00<br>027<br>937<br>9 | ASV_3099                                                                        | 0.00<br>237<br>781<br>8   | 0.00<br>061<br>395<br>1 | Oligoflexales_uncultu<br>red_soil                                              | 0.00<br>294<br>806<br>4 | 0.00<br>071<br>849<br>4 | Metamycoplasma_saliv<br>arium                               | 0.00<br>135<br>656<br>6   | 0.00<br>025<br>228<br>9 | ASV_2622                                                  | 0.00<br>109<br>185<br>4 | 0.00<br>026<br>488<br>9        |
| Segetibacter_sp.                                              | 0.00<br>234<br>499<br>6 | 0.00<br>060<br>547<br>5 | Hungateiclostridiacea<br>e_UCG-<br>012_uncultured_bact<br>erium | 0.00<br>240<br>686<br>5 | 0.00<br>062<br>145<br>2 | ASV_363                                                                         | 0.00<br>223<br>215<br>1   | 0.00<br>027<br>145<br>2 | Rubrinisphaeraeceae_<br>SH-<br>PL14_uncultured_pl<br>anctomycete               | 0.00<br>286<br>744<br>8 | 0.00<br>052<br>003<br>9 | ASV_2779                                                    | 0.00<br>132<br>237<br>5   | 0.00<br>034<br>143<br>6 | Obscuribacteraceae_<br>metagenome                         | 0.00<br>100<br>822<br>3 | 0.00<br>021<br>055<br>3        |
| Prevotella_veroralis                                          | 0.00<br>225<br>119<br>6 | 0.00<br>058<br>125<br>6 | Perilicidibaca_uncult<br>ured_bacterium                         | 0.00<br>240<br>686<br>5 | 0.00<br>062<br>145<br>2 | Treponema_parvum                                                                | 0.00<br>213<br>864<br>9   | 0.00<br>055<br>219<br>9 | Actinomycetaceae_F<br>0332unidentified                                         | 0.00<br>275<br>418<br>1 | 0.00<br>033<br>174<br>8 | Stomatobaculum_uncult<br>ured_bacterium                     | 0.00<br>132<br>044<br>6   | 0.00<br>034<br>093<br>6 | ASV_3132                                                  | 0.00<br>098<br>583<br>4 | 0.00<br>018<br>111<br>5        |
| ASV_256                                                       | 0.00<br>212<br>255<br>3 | 0.00<br>033<br>149<br>3 | Anaerococcus_hydro<br>genalis                                   | 0.00<br>239<br>980<br>8 | 0.00<br>061<br>962<br>8 | ASV_2080                                                                        | 0.00<br>212<br>594<br>1   | 0.00<br>037<br>093<br>1 | Phaselicystis_sp.                                                              | 0.00<br>269<br>919<br>8 | 0.00<br>069<br>692<br>8 | Corynebacterium_duru<br>m                                   | 0.00<br>129<br>674<br>1   | 0.00<br>016<br>669<br>5 | Brevudimonas_dimi<br>nuta                                 | 0.00<br>096<br>738<br>5 | 0.00<br>019<br>938<br>4        |
| Cellvibrio_uncultured_<br>Cellvibrio                          | 0.00<br>208<br>886<br>6 | 0.00<br>027<br>614<br>5 | DEVU114_uncultured_<br>verrucomicrobium                         | 0.00<br>230<br>221<br>9 | 0.00<br>059<br>443<br>3 | Corynebacterium_prop<br>inquum                                                  | 0.00<br>207<br>180<br>3   | 0.00<br>039<br>037<br>3 | Georgenia_unculture<br>d_bacterium                                             | 0.00<br>262<br>850<br>5 | 0.00<br>067<br>867<br>7 | Candidatus_Saccharimo<br>nasTM7_phylum                      | 0.00<br>128<br>421<br>1   | 0.00<br>023<br>683<br>5 | ASV_709                                                   | 0.00<br>091<br>561<br>6 | 0.00<br>013<br>556<br>5        |
| ASV_7220                                                      | 0.00<br>205<br>640<br>4 | 0.00<br>053<br>096<br>1 | Actinoplanes_sp.                                                | 0.00<br>228<br>255<br>6 | 0.00<br>058<br>935<br>3 | Tannerella_forsythia                                                            | 0.00<br>206<br>328<br>7   | 0.00<br>037<br>725<br>2 | ASV_4892                                                                       | 0.00<br>255<br>141<br>5 | 0.00<br>065<br>877<br>3 | Eubacterium_nodatum                                         | 0.00<br>125<br>958<br>7   | 0.00<br>017<br>925<br>4 | ASV_720                                                   | 0.00<br>089<br>314<br>8 | 0.00<br>018<br>409<br>8        |
| Methylomonadaceae_<br>uncultured_metage<br>nome               | 0.00<br>205<br>640<br>4 | 0.00<br>053<br>096<br>1 | Selenomonadaceae_<br>uncultured_rumen                           | 0.00<br>222<br>376<br>7 | 0.00<br>057<br>417<br>4 | Anaerovoracaceae_Fa<br>mily_XIII_UCG-<br>006Peptostreptococca<br>ceae_bacterium | 0.00<br>202<br>199<br>6   | 0.00<br>052<br>207<br>7 | ASV_6651                                                                       | 0.00<br>247<br>959<br>5 | 0.00<br>064<br>022<br>9 | Alloscardovia_omnicole<br>ns                                | 0.00<br>124<br>908<br>9   | 0.00<br>027<br>602<br>2 | ASV_1862                                                  | 0.00<br>083<br>284<br>1 | 0.00<br>732<br>E-<br>05        |
| KaistiaRhizobiales_(r<br>hizobacteria)                        | 0.00<br>199<br>723<br>5 | 0.00<br>051<br>568<br>4 | Caenarcaniphilales_<br>microbial_mat                            | 0.00<br>219<br>757<br>2 | 0.00<br>056<br>741<br>1 | Actinomycetaceae_F0<br>332unidentified                                          | 0.00<br>193<br>248<br>13  | 0.00<br>044<br>228<br>9 | Treponema_parvum                                                               | 0.00<br>247<br>574<br>9 | 0.00<br>063<br>923<br>6 | ASV_476                                                     | 0.00<br>118<br>656<br>7   | 0.00<br>023<br>731<br>1 | Gammaproteobacteri<br>a_PLTA13_sp.                        | 0.00<br>082<br>279<br>1 | 0.00<br>021<br>244<br>4        |
| Parabacteroides_mer<br>dae                                    | 0.00<br>199<br>723<br>5 | 0.00<br>051<br>568<br>4 | Hydrogenedensaceae_<br>uncultured_bacteri<br>um                 | 0.00<br>219<br>757<br>2 | 0.00<br>056<br>741<br>1 | Metamycoplasma_saliv<br>arium                                                   | 0.00<br>173<br>192<br>5   | 0.00<br>025<br>182<br>7 | Treponema_lecithinoli<br>yticum                                                | 0.00<br>243<br>589<br>1 | 0.00<br>033<br>691<br>9 | Treponema_lecithinolyt<br>icum                              | 0.00<br>111<br>176<br>3   | 0.00<br>015<br>821<br>6 | ASV_3215                                                  | 0.00<br>081<br>550<br>7 | 0.00<br>014<br>162<br>8        |
| ASV_6633                                                      | 0.00<br>196<br>814<br>8 | 0.00<br>050<br>814<br>8 | Planctomycetes_unc<br>ultured_Planctomycet<br>aceae             | 0.00<br>219<br>757<br>2 | 0.00<br>056<br>741<br>1 | Mogibacterium_timidu<br>m                                                       | 0.00<br>167<br>851<br>6   | 0.00<br>043<br>339<br>1 | Symbiobacterium_sp.                                                            | 0.00<br>239<br>678<br>4 | 0.00<br>061<br>884<br>7 | Porphyromonas_catonie<br>a                                  | 0.00<br>111<br>172<br>6   | 0.00<br>014<br>298<br>9 | ASV_1642                                                  | 0.00<br>081<br>020<br>4 | 0.00<br>094<br>994<br>5        |
| Rikenella_uncultured_<br>bacterium                            | 0.00<br>196<br>814<br>8 | 0.00<br>050<br>814<br>8 | Prevotellaceae_UCG<br>-<br>003_uncultured_Bact<br>eroidales     | 0.00<br>219<br>757<br>2 | 0.00<br>056<br>741<br>1 | Anaerolineaceae_bact<br>erium                                                   | 0.00<br>166<br>467<br>9   | 0.00<br>035<br>591<br>9 | Bryobacter_unculture<br>d_bacterium                                            | 0.00<br>216<br>964<br>0 | 0.00<br>056<br>02<br>2  | Anaerovoracaceae_Fa<br>mily_XIII_UCG-<br>004Eubacterium_sp. | 0.00<br>105<br>521<br>2   | 0.00<br>017<br>198<br>2 | ASV_2180                                                  | 0.00<br>074<br>991<br>3 | 0.00<br>013<br>435<br>3        |
| Gallicola_Peptostrept<br>ococaceae_bacteriu<br>m              | 0.00<br>196<br>672<br>5 | 0.00<br>050<br>780<br>6 | ASV_1837                                                        | 0.00<br>193<br>523<br>1 | 0.00<br>043<br>143<br>8 | Cellvibrio_uncultured_<br>Cellvibrio                                            | 0.00<br>164<br>020<br>9   | 0.00<br>016<br>016<br>7 | Weeksellaceae_uncu<br>ltured_Wautersiella_s<br>p.                              | 0.00<br>209<br>937<br>5 | 0.00<br>054<br>205<br>5 | Megasphaera_micronuc<br>liformis                            | 0.00<br>103<br>887<br>5   | 0.00<br>026<br>823<br>6 | Saccharimonadales_u<br>ncultured_organism                 | 0.00<br>074<br>806<br>5 | 0.00<br>019<br>315<br>5        |
| Periglandula_ipomoe<br>ae                                     | 0.00<br>187<br>599<br>7 | 0.00<br>048<br>438<br>3 | Acinetobacter_kyong<br>giensis                                  | 0.00<br>192<br>629<br>3 | 0.00<br>049<br>629<br>8 | Leptotrichia_wadaii                                                             | 0.00<br>163<br>274<br>8   | 0.00<br>030<br>285<br>3 | Anaerovoracaceae_F<br>amily_XIII_UCG-<br>006Peptostreptococ<br>aceae_bacterium | 0.00<br>209<br>932<br>2 | 0.00<br>054<br>204<br>2 | Anaerovoracaceae_Fa<br>mily_XIII_UCG-<br>005Eubacterium_sp. | 0.00<br>095<br>722<br>7   | 0.00<br>014<br>980<br>8 | ASV_10537                                                 | 0.00<br>071<br>994<br>8 | 0.00<br>018<br>588<br>8        |
| ASV_3443                                                      | 0.00<br>184<br>457<br>1 | 0.00<br>042<br>901<br>7 | Burkholderiales_sp.                                             | 0.00<br>192<br>215<br>3 | 0.00<br>049<br>629<br>8 | Candidatus_Aquirestis_<br>uncultured_bacterium                                  | 0.00<br>041<br>161<br>352 | 0.00<br>041<br>660<br>9 | ASV_678                                                                        | 0.00<br>209<br>694<br>8 | 0.00<br>037<br>688<br>4 | Parvimonas_Peptostrep<br>tococaceae_bacterium               | 0.00<br>023<br>090<br>665 | 0.00<br>023<br>254<br>7 | Terrimicrobiaceae_Fu<br>kuN18_freshwater_gr<br>oup_sp.    | 0.00<br>071<br>994<br>2 | 0.00<br>018<br>588<br>8        |
| Sharpea_uncultured_<br>bacterium                              | 0.00<br>182<br>305<br>6 | 0.00<br>047<br>071<br>1 | Physcisphaeraceae_u<br>ncultured_metageno<br>me                 | 0.00<br>192<br>215<br>3 | 0.00<br>049<br>629<br>8 | Allobranchibius_sp.                                                             | 0.00<br>157<br>105<br>9   | 0.00<br>040<br>564<br>6 | Fretibacteriumuncultu<br>red_Fretibacterium                                    | 0.00<br>200<br>521<br>2 | 0.00<br>051<br>774<br>4 | ASV_678                                                     | 0.00<br>083<br>883<br>1   | 0.00<br>014<br>231<br>2 | Rothia_aeria                                              | 0.00<br>071<br>093<br>4 | 0.00<br>453<br>E-<br>05        |
| Acinetobacter_towner<br>i                                     | 0.00<br>175<br>410<br>6 | 0.00<br>045<br>290<br>8 | Saprosiraceae_OLB<br>8_sp.                                      | 0.00<br>192<br>215<br>3 | 0.00<br>049<br>629<br>8 | ASV_4513                                                                        | 0.00<br>152<br>859<br>8   | 0.00<br>039<br>468<br>2 | Chloroflexia_sp.                                                               | 0.00<br>199<br>94<br>3  | 0.00<br>051<br>624<br>3 | ASV_513                                                     | 0.00<br>073<br>990<br>5   | 0.00<br>019<br>104<br>3 | Candidatus_Obscurib<br>acter_uncultured_bac<br>terium     | 0.00<br>066<br>851<br>8 | 0.00<br>017<br>261<br>1        |
| ASV_7457                                                      | 0.00<br>172<br>201<br>7 | 0.00<br>044<br>462<br>3 | Gaiellales_sp.                                                  | 0.00<br>191<br>984<br>6 | 0.00<br>049<br>570<br>2 | Roseomonas_lacus                                                                | 0.00<br>145<br>705<br>9   | 0.00<br>037<br>620<br>9 | Pyramidobacter_pisc<br>olens                                                   | 0.00<br>198<br>593<br>9 | 0.00<br>051<br>276<br>7 | Simonsiella_muelleri                                        | 0.00<br>070<br>516<br>3   | 0.00<br>018<br>207<br>2 | ASV_1760                                                  | 0.00<br>066<br>675<br>3 | 0.00<br>017<br>215<br>5        |
| Saprosiraceae_OLB<br>8_metagenome                             | 0.00<br>171<br>581<br>8 | 0.00<br>044<br>302<br>2 | Bdellovibrio_uncultu<br>red_Bdellovibrionales                   | 0.00<br>188<br>867<br>9 | 0.00<br>048<br>765<br>5 | Gammaproteobacteria_<br>EV818SWAP80unc<br>ultured_gamma                         | 0.00<br>144<br>367<br>5   | 0.00<br>037<br>275<br>5 | Plantibacter_sp.                                                               | 0.00<br>180<br>702<br>6 | 0.00<br>032<br>167<br>4 | Neisseria_bacilliformis                                     | 0.00<br>065<br>821<br>2   | 0.00<br>016<br>995<br>5 | ASV_4280                                                  | 0.00<br>061<br>474<br>7 | 0.00<br>015<br>872<br>7        |
| ASV_1837                                                      | 0.00<br>169<br>423<br>1 | 0.00<br>029<br>940<br>5 | ASV_5944                                                        | 0.00<br>187<br>630<br>3 | 0.00<br>048<br>445<br>9 | ASV_366                                                                         | 0.00<br>143<br>676<br>5   | 0.00<br>018<br>570<br>9 | Lawsonella_unculture<br>d_bacterium                                            | 0.00<br>173<br>855<br>9 | 0.00<br>023<br>355<br>9 | Actinomycetaceae_F03<br>2_uncultured_bacteriu<br>m          | 0.00<br>062<br>841<br>6   | 0.00<br>010<br>507<br>6 | Leptosirauncultured_<br>Spirochaetales                    | 0.00<br>057<br>959<br>5 | 0.00<br>835<br>946<br>E-<br>05 |
| Phaeodactylbacter_<br>metagenome                              | 0.00<br>168<br>996<br>8 | 0.00<br>043<br>634<br>8 | ASV_2889                                                        | 0.00<br>183<br>557<br>7 | 0.00<br>047<br>394<br>4 | Rhizobiales_A0839_u<br>ncultured_sludge                                         | 0.00<br>137<br>558<br>7   | 0.00<br>025<br>070<br>7 | Eggerthellaceae_DN<br>F00809_uncultured_<br>bacterium                          | 0.00<br>173<br>012<br>9 | 0.00<br>044<br>671<br>7 | Filifactor_alocis                                           | 0.00<br>061<br>032<br>7   | 0.00<br>015<br>758<br>6 | Paracaeidiabacterace<br>e_uncultured_Acetob<br>acteraceae | 0.00<br>056<br>566<br>9 | 0.00<br>014<br>605<br>5        |
| Lactobacillus_sanfran<br>ciscensis                            | 0.00<br>168<br>839<br>7 | 0.00<br>043<br>594<br>2 | ASV_5749                                                        | 0.00<br>181<br>723<br>8 | 0.00<br>046<br>920<br>9 | Butyrivibrio_Eubacteri<br>um_sp.                                                | 0.00<br>136<br>668<br>5   | 0.00<br>024<br>734<br>5 | SelenomonasSchwar<br>zta_sp.                                                   | 0.00<br>171<br>565<br>1 | 0.00<br>044<br>297<br>9 | Prevotelluncultured_Pr<br>evotella                          | 0.00<br>060<br>926<br>3   | 0.00<br>015<br>731<br>1 | ASV_4670                                                  | 0.00<br>055<br>291<br>7 | 0.00<br>014<br>276<br>3        |
| Chlamydiaceae_uncu<br>ltured_organism                         | 0.00<br>160<br>857<br>9 | 0.00<br>041<br>533<br>3 | Hylemonella_sp.                                                 | 0.00<br>181<br>332<br>6 | 0.00<br>043<br>123<br>8 | Shuttleworthia_satelle<br>s                                                     | 0.00<br>136<br>060<br>7   | 0.00<br>025<br>849<br>6 | ASV_5494                                                                       | 0.00<br>168<br>575<br>2 | 0.00<br>043<br>525<br>9 | Leptotrichia_shahii                                         | 0.00<br>060<br>025<br>8   | 0.00<br>012<br>573<br>4 | Meiothermus_uncultu<br>red_Deinococci                     | 0.00<br>053<br>994<br>4 | 0.00<br>696<br>706<br>E-<br>05 |
| ASV_6292                                                      | 0.00<br>159<br>875<br>4 | 0.00<br>035<br>843<br>8 | Occallatibacter_sp.                                             | 0.00<br>180<br>681<br>6 | 0.00<br>046<br>651<br>5 | ASV_3100                                                                        | 0.00<br>135<br>008<br>4   | 0.00<br>034<br>359<br>8 | Mogibacterium_timidu<br>m                                                      | 0.00<br>167<br>945<br>4 | 0.00<br>043<br>363<br>4 | ASV_366                                                     | 0.00<br>058<br>038<br>1   | 7.07<br>856<br>E-<br>05 | ASV_4800                                                  | 0.00<br>053<br>665<br>5 | 0.00<br>013<br>856<br>4        |
| Oscillospirales_UCG-<br>010_metagenome                        | 0.00<br>159<br>377<br>4 | 0.00<br>028<br>874<br>4 | ASV_9280                                                        | 0.00<br>177<br>758<br>9 | 0.00<br>045<br>896<br>6 | Dehalococcoidia_RBG<br>-13-46-<br>9uncultured_sludge                            | 0.00<br>132<br>459<br>1   | 0.00<br>034<br>200<br>8 | ASV_5701                                                                       | 0.00<br>162<br>762<br>3 | 0.00<br>042<br>025<br>2 | Prevotella_multiformis                                      | 0.00<br>055<br>334<br>2   | 0.00<br>014<br>287<br>2 | Chloroflexi_OLB14_u<br>ncultured_bacterium                | 0.00<br>052<br>132<br>6 | 8.03<br>582<br>E-<br>05        |
| Lactobacillus_delbrue<br>ckii                                 | 0.00<br>156<br>547<br>5 | 0.00<br>040<br>420<br>4 | ASV_10043                                                       | 0.00<br>168<br>188<br>4 | 0.00<br>043<br>426<br>1 | Oligoflexales_uncultu<br>red_soil                                               | 0.00<br>128<br>643<br>9   | 0.00<br>013<br>682<br>2 | Selenomonadaceae_<br>uncultured_sp.                                            | 0.00<br>162<br>362<br>8 | 0.00<br>041<br>921<br>9 | Parvimonas_sp.                                              | 0.00<br>052<br>053<br>7   | 5.98<br>127<br>E-<br>05 | ASV_13441                                                 | 0.00<br>051<br>424<br>5 | 0.00<br>013<br>277<br>7        |
| Bacillus_coagulans                                            | 0.00<br>156<br>060<br>3 | 0.00<br>040<br>294<br>6 | ASV_9484                                                        | 0.00<br>167<br>434<br>1 | 0.00<br>043<br>231<br>3 | Defluvitaleaceae_UC<br>G-<br>011_uncultured_rume<br>n                           | 0.00<br>122<br>768<br>9   | 0.00<br>031<br>698<br>8 | Fibrobracteraceae_un<br>cultured_microbial_m<br>at                             | 0.00<br>155<br>763<br>2 | 0.00<br>040<br>217<br>9 | ASV_363                                                     | 0.00<br>049<br>858<br>4   | 7.39<br>388<br>E-<br>05 | ASV_5985                                                  | 0.00<br>051<br>178<br>9 | 0.00<br>010<br>348<br>9        |
| Rothia_aeria                                                  | 0.00<br>156<br>060<br>3 | 0.00<br>040<br>294<br>6 | Mangroviflexus_sp.                                              | 0.00<br>167<br>434<br>1 | 0.00<br>043<br>231<br>3 | Fretibacteriumuncultu<br>red_Fretibacterium                                     | 0.00<br>121<br>190<br>1   | 0.00<br>031<br>291<br>1 | ASV_3639                                                                       | 0.00<br>152<br>879<br>9 | 0.00<br>026<br>316<br>7 | Eggerthia_cateniformis                                      | 0.00<br>047<br>084<br>5   | 7.63<br>442<br>E-<br>05 | Candidatus_Bealeia_<br>uncultured_Alphaprot<br>eobacteria | 0.00<br>050<br>607<br>4 | 9.09<br>926<br>E-<br>05        |

|                                                      |                         |                         |                                                  |                         |                         |                                                                    |                         |                         |                                                                    |                         |                         |                                                                    |                         |                           |                                              |                         |                         |
|------------------------------------------------------|-------------------------|-------------------------|--------------------------------------------------|-------------------------|-------------------------|--------------------------------------------------------------------|-------------------------|-------------------------|--------------------------------------------------------------------|-------------------------|-------------------------|--------------------------------------------------------------------|-------------------------|---------------------------|----------------------------------------------|-------------------------|-------------------------|
| Coralliomargarita_sp.                                | 0.00<br>155<br>801<br>6 | 0.00<br>040<br>227<br>8 | Steroidobacter_sp.                               | 0.00<br>160<br>076<br>8 | 0.00<br>041<br>331<br>7 | uncultured_Actinomyces                                             | 0.00<br>120<br>731      | 0.00<br>031<br>172<br>6 | bacterium_CS910                                                    | 0.00<br>149<br>955      | 0.00<br>038<br>718<br>2 | Treponema_medium                                                   | 0.00<br>046<br>111<br>8 | 0.00<br>011<br>906        | Streptococcus_mutans                         | 0.00<br>049<br>817<br>4 | 9.44<br>211<br>E-05     |
| Leptolyngbya_PCC-6306_sp.                            | 0.00<br>154<br>486      | 0.00<br>039<br>888<br>1 | Brochothrix_sp.                                  | 0.00<br>159<br>914<br>7 | 0.00<br>041<br>289<br>8 | ASV_1901                                                           | 0.00<br>118<br>917<br>6 | 0.00<br>019<br>801<br>4 | Pantoea_sp.                                                        | 0.00<br>149<br>955      | 0.00<br>038<br>718<br>2 | Cardiobacterium_sp.                                                | 0.00<br>045<br>203<br>3 | 5.03<br>825<br>E-05       | Oligoflexus_uncultured_delta                 | 0.00<br>047<br>325<br>3 | 7.56<br>976<br>E-05     |
| ASV_5700                                             | 0.00<br>148<br>833<br>3 | 0.00<br>038<br>428<br>6 | Caulobacter_metagenome                           | 0.00<br>156<br>969<br>4 | 0.00<br>040<br>529<br>3 | Sphingobacteriaceae_sp.                                            | 0.00<br>116<br>953<br>2 | 0.00<br>030<br>197<br>3 | Hephaestia_uncultured_bacterium                                    | 0.00<br>144<br>643      | 0.00<br>037<br>346<br>7 | Alysiella_uncultured_bacterium                                     | 0.00<br>043<br>222<br>2 | 0.00<br>011<br>159<br>9   | ASV_2510                                     | 0.00<br>046<br>931<br>2 | 9.47<br>77E-05          |
| ASV_4770                                             | 0.00<br>147<br>601<br>5 | 0.00<br>038<br>110<br>5 | ASV_7514                                         | 0.00<br>156<br>174<br>9 | 0.00<br>040<br>324<br>2 | Belnapia_sp.                                                       | 0.00<br>113<br>621<br>2 | 0.00<br>029<br>336<br>9 | Acetitomaculum_uncultured_bacterium                                | 0.00<br>139<br>510<br>6 | 0.00<br>036<br>021<br>5 | Anaerovoracaceae_uncultured_bacterium                              | 0.00<br>041<br>347<br>9 | 0.00<br>010<br>010<br>676 | ASV_4487                                     | 0.00<br>046<br>847<br>8 | 0.00<br>012<br>096      |
| Myroides_uncultured_bacterium                        | 0.00<br>146<br>886      | 0.00<br>037<br>925<br>8 | Terrabacter_sp.                                  | 0.00<br>156<br>174<br>9 | 0.00<br>040<br>324<br>2 | Hymenobacter_uncultured_Bacteroidetes                              | 0.00<br>113<br>621<br>2 | 0.00<br>029<br>336<br>9 | Osoilospiraceae_UCG-005_metagenome                                 | 0.00<br>139<br>510<br>6 | 0.00<br>036<br>021<br>5 | Anaerovoracaceae_Family_XIII_UCG-001_sp.                           | 0.00<br>040<br>607<br>6 | 6.34<br>502<br>E-05       | ASV_14376                                    | 0.00<br>046<br>282      | 0.00<br>011<br>95       |
| Cytophaga_aurantiaca                                 | 0.00<br>144<br>107<br>1 | 0.00<br>037<br>208<br>3 | Acidobacteria_Elev-16S-1166_uncultured_bacterium | 0.00<br>155<br>987<br>5 | 0.00<br>040<br>275<br>8 | Candidatus_Aquirestis_sp.                                          | 0.00<br>113<br>107<br>2 | 0.00<br>015<br>866<br>8 | Arcticibacter_uncultured_bacterium                                 | 0.00<br>137<br>575<br>2 | 0.00<br>035<br>521<br>8 | Actinomyces_israelii                                               | 0.00<br>036<br>854<br>5 | 6.74<br>058<br>E-05       | Carnobacteriaceae_uncultured_bacterium       | 0.00<br>046<br>282      | 0.00<br>011<br>95       |
| Mitochondriauncultured_Rickettsiales                 | 0.00<br>141<br>345<br>3 | 0.00<br>036<br>495<br>2 | Haliangium_uncultured_Koferiaceae                | 0.00<br>155<br>987<br>5 | 0.00<br>040<br>275<br>8 | Treponema_maltophilum                                              | 0.00<br>109<br>524<br>8 | 0.00<br>028<br>279<br>2 | ASV_3568                                                           | 0.00<br>135<br>281<br>7 | 0.00<br>021<br>894<br>3 | Rhodospirillales_uncultured_sp.                                    | 0.00<br>032<br>790<br>6 | 8.46<br>65E-05            | Marinoscillum_metagenome                     | 0.00<br>046<br>282      | 0.00<br>011<br>95       |
| Prevotella_nigrescens                                | 0.00<br>139<br>980<br>3 | 0.00<br>039<br>122<br>6 | Lactobacillus_gasserii                           | 0.00<br>155<br>987<br>5 | 0.00<br>040<br>275<br>8 | Geobacteraceae_sp.                                                 | 0.00<br>108<br>756<br>8 | 0.00<br>028<br>080<br>9 | Tepidimonas_sp.                                                    | 0.00<br>126<br>557<br>6 | 0.00<br>032<br>677      | Mobiluncus_uncultured_bacterium                                    | 0.00<br>030<br>493      | 7.87<br>326<br>E-05       | Gammaproteobacteria_R7C24uncultured_gamma    | 0.00<br>044<br>209<br>8 | 0.00<br>011<br>9        |
| ASV_8991                                             | 0.00<br>139<br>401<br>4 | 0.00<br>035<br>993<br>3 | ASV_5741                                         | 0.00<br>155<br>213<br>9 | 0.00<br>040<br>213<br>4 | SelenomonasSchwartzia_sp.                                          | 0.00<br>106<br>284<br>4 | 0.00<br>027<br>422<br>5 | Anaerovoracaceae_Family_XIII_UCG-007Peptostreptococcaeae_bacterium | 0.00<br>125<br>959<br>2 | 0.00<br>032<br>522<br>5 | Mogibacterium_timidum                                              | 0.00<br>029<br>250<br>4 | 5.60<br>655<br>E-05       | Solobacterium_moorei                         | 0.00<br>043<br>7        | 5.10<br>88E-05          |
| Methyloversatilis_sp.                                | 0.00<br>139<br>401<br>4 | 0.00<br>035<br>993<br>3 | Sphingomonas_paniciterra                         | 0.00<br>152<br>883<br>9 | 0.00<br>039<br>474<br>5 | Aliterella_cyanobacterium_OU_20                                    | 0.00<br>103<br>233<br>7 | 0.00<br>026<br>654<br>8 | Solobacterium_mooraei                                              | 0.00<br>125<br>800<br>3 | 0.00<br>019<br>820<br>4 | Howardella_sp.                                                     | 0.00<br>029<br>122<br>7 | 5.04<br>405<br>E-05       | Acinetobacter_baumannii                      | 0.00<br>042<br>386<br>1 | 0.00<br>010<br>944      |
| Corynebacterium_aurimucosum                          | 0.00<br>138<br>720<br>3 | 0.00<br>035<br>817<br>4 | Ammoniphilus_oxaliticus                          | 0.00<br>152<br>544<br>7 | 0.00<br>039<br>386<br>9 | Lechevalieria_sp.                                                  | 0.00<br>103<br>233<br>7 | 0.00<br>026<br>654<br>8 | ASV_6298                                                           | 0.00<br>123<br>979<br>7 | 0.00<br>032<br>011<br>4 | Prevotella_loeschii                                                | 0.00<br>029<br>030<br>2 | 5.54<br>034<br>E-05       | Carnobacteriaceae_sp.                        | 0.00<br>042<br>281<br>9 | 0.00<br>010<br>917<br>1 |
| Psychroglaciecola_uncultured_bacterium               | 0.00<br>138<br>270<br>1 | 0.00<br>035<br>701<br>2 | ASV_1592                                         | 0.00<br>152<br>402<br>9 | 0.00<br>022<br>166<br>2 | Prevotella_histicola                                               | 0.00<br>101<br>906<br>5 | 0.00<br>026<br>312<br>1 | Burkholderiales_SC-I-84_metagenome                                 | 0.00<br>123<br>979<br>7 | 0.00<br>032<br>011<br>4 | Capnocytophaga_gingivialis                                         | 0.00<br>028<br>297<br>1 | 7.30<br>628<br>E-05       | Sphingobacteriaceae_bacterium                | 0.00<br>042<br>281<br>9 | 0.00<br>010<br>917<br>1 |
| Hungateiclostridiaceae_uncultured_bacterium          | 0.00<br>138<br>202<br>3 | 0.00<br>035<br>683<br>7 | PHOS-HE36_sp.                                    | 0.00<br>149<br>726<br>2 | 0.00<br>038<br>659<br>1 | Sandaracinobacter_uncultured_bacterium                             | 0.00<br>100<br>254<br>5 | 0.00<br>025<br>885<br>5 | ASV_3531                                                           | 0.00<br>121<br>984<br>3 | 0.00<br>024<br>595<br>1 | Peptoanaerobacter_stomatensis                                      | 0.00<br>028<br>206<br>5 | 7.28<br>289<br>E-05       | ASV_7533                                     | 0.00<br>041<br>971<br>3 | 7.92<br>243<br>E-05     |
| Actinoplanes_garbadensis                             | 0.00<br>137<br>093<br>6 | 0.00<br>035<br>397<br>4 | Chitinophagaceae_uncultured_bacterium            | 0.00<br>148<br>042<br>7 | 0.00<br>027<br>833<br>5 | Anaerovoracaceae_Family_XIII_UCG-007Peptostreptococcaeae_bacterium | 0.00<br>099<br>803<br>6 | 0.00<br>029<br>765<br>2 | Anaerolineaceae_bacterium                                          | 0.00<br>121<br>419<br>7 | 0.00<br>026<br>470<br>9 | Jonquetella_anthropi                                               | 0.00<br>024<br>172<br>6 | 6.24<br>134<br>E-05       | Alcaligenaceae_sp.                           | 0.00<br>041<br>139<br>6 | 0.00<br>010<br>622<br>2 |
| Azorhizobium_sp.                                     | 0.00<br>131<br>319<br>8 | 0.00<br>033<br>906<br>6 | ASV_10583                                        | 0.00<br>146<br>504<br>8 | 0.00<br>037<br>827<br>4 | Candidatus_Limnoluna_uncultured_bacterium                          | 0.00<br>099<br>011<br>5 | 0.00<br>013<br>879<br>1 | ASV_5801                                                           | 0.00<br>120<br>378<br>3 | 0.00<br>031<br>081<br>5 | Haemophilus_paraohaemolyticus                                      | 0.00<br>023<br>854<br>6 | 6.15<br>923<br>E-05       | Anaerolineae_A4b_wastewater_metagenome       | 0.00<br>041<br>139<br>6 | 0.00<br>010<br>622<br>2 |
| ASV_2180                                             | 0.00<br>130<br>472<br>8 | 0.00<br>033<br>687<br>9 | Bacteroidales_M2PB4-65_lemite_group_sp.          | 0.00<br>146<br>504<br>8 | 0.00<br>037<br>827<br>4 | Gramicibacteria_marine_uncultured_bacterium                        | 0.00<br>098<br>241<br>5 | 0.00<br>025<br>365<br>2 | Prevotella_fusca                                                   | 0.00<br>120<br>378<br>3 | 0.00<br>031<br>081<br>5 | Parvimonas_micra                                                   | 0.00<br>023<br>716<br>8 | 6.12<br>365<br>E-05       | ASV_15366                                    | 0.00<br>041<br>139<br>6 | 0.00<br>010<br>622<br>2 |
| ASV_2386                                             | 0.00<br>129<br>005<br>6 | 0.00<br>022<br>670<br>7 | Caryophanon_sp.                                  | 0.00<br>144<br>428<br>4 | 0.00<br>037<br>291<br>3 | Eggerthia_cateniformis                                             | 0.00<br>097<br>577<br>1 | 0.00<br>025<br>134<br>3 | Candidatus_Nostocoida_uncultured_bacterium                         | 0.00<br>119<br>964<br>6 | 0.00<br>030<br>974<br>6 | Gemella_asaccharolytica                                            | 0.00<br>023<br>566<br>5 | 6.08<br>472<br>E-05       | ASV_15373                                    | 0.00<br>041<br>139<br>6 | 0.00<br>010<br>622<br>2 |
| Bly10_sp.                                            | 0.00<br>127<br>301<br>2 | 0.00<br>032<br>869      | Lachnospiraceae_UCG-008_metagenome               | 0.00<br>144<br>428<br>4 | 0.00<br>037<br>291<br>3 | Selenomonas_sputigena                                              | 0.00<br>096<br>028<br>5 | 0.00<br>024<br>794<br>5 | Leptotrichia_hofstadii                                             | 0.00<br>118<br>86       | 0.00<br>030<br>689<br>5 | Johnsonella_ignava                                                 | 0.00<br>020<br>975<br>1 | 3.31<br>628<br>E-05       | Sphingomonas_uncultured_bacterium            | 0.00<br>041<br>139<br>6 | 0.00<br>010<br>622<br>2 |
| Candidatus_Saccharimonas                             | 0.00<br>126<br>896<br>2 | 0.00<br>027<br>583<br>7 | ASV_14404                                        | 0.00<br>144<br>069<br>2 | 0.00<br>037<br>198<br>5 | Nitrospirillum_sp.                                                 | 0.00<br>093<br>755<br>9 | 0.00<br>024<br>207<br>7 | ASV_11492                                                          | 0.00<br>116<br>822<br>4 | 0.00<br>030<br>163<br>4 | Veillonellaceae_sp.                                                | 0.00<br>020<br>344<br>2 | 5.25<br>285<br>E-05       | Fusobacterium_neorophorum                    | 0.00<br>041<br>041<br>8 | 0.00<br>010<br>596<br>9 |
| ASV_2061                                             | 0.00<br>124<br>441<br>7 | 0.00<br>026<br>813<br>9 | Methyloigellaceae_sp.                            | 0.00<br>144<br>069<br>2 | 0.00<br>037<br>198<br>5 | Chitinophagales_37-13_uncultured_Sphingobacteriales                | 0.00<br>092<br>721<br>4 | 0.00<br>023<br>940<br>6 | Peptococcus_sp.                                                    | 0.00<br>112<br>864<br>2 | 0.00<br>024<br>922      | ASV_17842                                                          | 0.00<br>019<br>228<br>6 | 4.96<br>48E-05            | Armatimonadalesuncultured_Armatimonadales    | 0.00<br>040<br>155<br>3 | 0.00<br>010<br>368<br>1 |
| SpirochaetaSpirochaeta_sp.                           | 0.00<br>123<br>520<br>3 | 0.00<br>031<br>892<br>8 | ASV_4520                                         | 0.00<br>141<br>913<br>7 | 0.00<br>033<br>804<br>4 | Oligoflexia_0319-6G20_uncultured_Geobacter                         | 0.00<br>092<br>721<br>4 | 0.00<br>023<br>940<br>6 | ASV_10035                                                          | 0.00<br>112<br>495<br>1 | 0.00<br>029<br>046<br>1 | Prevotella_salivae                                                 | 0.00<br>019<br>083<br>7 | 4.92<br>739<br>E-05       | ASV_9089                                     | 0.00<br>039<br>297<br>6 | 0.00<br>010<br>146<br>6 |
| Hydrogenedensaceae_sp.                               | 0.00<br>123<br>224<br>1 | 0.00<br>031<br>816<br>3 | ASV_3021                                         | 0.00<br>138<br>677      | 0.00<br>035<br>806<br>2 | Gardnerella_vaginalis                                              | 0.00<br>091<br>289<br>7 | 0.00<br>023<br>570<br>9 | Aspergillus_nidulans                                               | 0.00<br>111<br>851<br>7 | 0.00<br>028<br>88       | Lachnoanaerobaculum_uncultured_Lachnospiraceae                     | 0.00<br>018<br>804<br>4 | 4.85<br>528<br>E-05       | ASV_9092                                     | 0.00<br>039<br>297<br>6 | 0.00<br>010<br>146<br>6 |
| Pedobacter_rivuli                                    | 0.00<br>123<br>224<br>1 | 0.00<br>031<br>816<br>3 | ASV_2080                                         | 0.00<br>136<br>292<br>8 | 0.00<br>035<br>190<br>6 | Sphingomonas_daechungensis                                         | 0.00<br>089<br>168<br>2 | 0.00<br>023<br>023      | Eubacterium_brachygroup_Eubacterium_sp.                            | 0.00<br>110<br>033<br>3 | 0.00<br>028<br>410<br>5 | Lentimicrobium_unidentified                                        | 0.00<br>018<br>804<br>4 | 4.85<br>528<br>E-05       | Oligoflexales_uncultured_soil                | 0.00<br>038<br>124<br>2 | 5.82<br>351<br>E-05     |
| Streptococcus_mutans                                 | 0.00<br>123<br>001<br>2 | 0.00<br>031<br>758<br>8 | Candidatus_Paracandidibacter_metagenome          | 0.00<br>136<br>040<br>2 | 0.00<br>035<br>125<br>4 | ASV_1161                                                           | 0.00<br>087<br>206<br>2 | 0.00<br>016<br>920<br>6 | Anaerolineae_1-20_sp.                                              | 0.00<br>107<br>087<br>2 | 0.00<br>027<br>649<br>8 | Prevotella_enoeca                                                  | 0.00<br>018<br>309<br>8 | 4.72<br>757<br>E-05       | Chitinophagaceae_uncultured_Halscomenobacter | 0.00<br>037<br>924<br>4 | 9.79<br>204<br>E-05     |
| Mitochondria_Eukaryota_sp.                           | 0.00<br>120<br>746<br>3 | 0.00<br>013<br>106<br>5 | Kitasatospora_sp.                                | 0.00<br>133<br>318<br>5 | 0.00<br>034<br>422<br>7 | ASV_4520                                                           | 0.00<br>086<br>886<br>8 | 0.00<br>022<br>434<br>1 | Bacteroidetes_BD2-2_uncultured_Cytophaga                           | 0.00<br>107<br>087<br>2 | 0.00<br>027<br>649<br>8 | Xanthomonadaceae_Xanthomonas_sp.                                   | 0.00<br>018<br>031<br>4 | 4.14<br>876<br>E-05       | Corynebacterium_amycolatum                   | 0.00<br>037<br>821<br>1 | 6.96<br>921<br>E-05     |
| Helicobacillus_massiliensis                          | 0.00<br>118<br>468<br>4 | 0.00<br>030<br>588<br>4 | ASV_2433                                         | 0.00<br>132<br>614<br>9 | 0.00<br>034<br>240<br>9 | Exiguobacterium_undae                                              | 0.00<br>086<br>886<br>8 | 0.00<br>022<br>434<br>1 | Desulfosporosinus_uncultured_bacterium                             | 0.00<br>107<br>087<br>2 | 0.00<br>027<br>649<br>8 | Treponema_parvum                                                   | 0.00<br>017<br>691<br>6 | 3.59<br>263<br>E-05       | ASV_292                                      | 0.00<br>037<br>762<br>5 | 6.67<br>425<br>E-05     |
| ASV_6194                                             | 0.00<br>117<br>508<br>8 | 0.00<br>030<br>340<br>6 | Chloroplast_uncultured_Cyanobacterium            | 0.00<br>132<br>036<br>1 | 0.00<br>034<br>091<br>6 | Burkholderiaceae_sp.                                               | 0.00<br>084<br>393<br>9 | 0.00<br>021<br>945<br>3 | Megamonasuncultured_organism                                       | 0.00<br>104<br>773<br>8 | 0.00<br>020<br>409<br>5 | Anaerovoracaceae_Family_XIII_UCG-007Peptostreptococcaeae_bacterium | 0.00<br>017<br>507<br>3 | 3.68<br>751<br>E-05       | Micavibrionales_uncultured_bacterium         | 0.00<br>037<br>403<br>2 | 9.65<br>746<br>E-05     |
| ASV_1592                                             | 0.00<br>116<br>933      | 0.00<br>016<br>091      | Roseomonas_uncultured_bacterium                  | 0.00<br>131<br>989<br>4 | 0.00<br>034<br>079<br>5 | Colidextribacter_sp.                                               | 0.00<br>084<br>922<br>1 | 0.00<br>021<br>926<br>8 | ASV_3026                                                           | 0.00<br>104<br>616<br>5 | 0.00<br>016<br>281<br>5 | Prevotella_buccae                                                  | 0.00<br>016<br>505<br>5 | 4.26<br>17E-05            | Microtunatus_sp.                             | 0.00<br>037<br>403<br>2 | 9.65<br>746<br>E-05     |
| Candidatus_Curtissbacteria_uncultured_Microgenomates | 0.00<br>115<br>975<br>6 | 0.00<br>029<br>944<br>8 | ASV_6422                                         | 0.00<br>131<br>252<br>7 | 0.00<br>033<br>889<br>3 | Pedobacter_namyangjensis                                           | 0.00<br>084<br>206<br>6 | 0.00<br>023<br>742<br>1 | ASV_10606                                                          | 0.00<br>104<br>459<br>6 | 0.00<br>026<br>971<br>4 | Johnsonella_Firmicutes_oral                                        | 0.00<br>014<br>651<br>6 | 3.78<br>303<br>E-05       | Melithermus_uncultured_bacterium             | 0.00<br>036<br>846      | 7.71<br>14E-05          |
| ASV_144                                              | 0.00<br>114<br>801<br>1 | 0.00<br>029<br>641<br>5 | Fimbrimonadaceae_metagenome                      | 0.00<br>131<br>252<br>7 | 0.00<br>033<br>889<br>3 | Candidatus_Latesocobacter_uncultured_Latesocobacteria              | 0.00<br>082<br>505<br>2 | 0.00<br>021<br>308      | BBMC-4_uncultured_bacterium                                        | 0.00<br>103<br>316<br>5 | 0.00<br>026<br>676<br>2 | Leptotrichiaceae_uncultured_Leptotrichia-like_sp.                  | 0.00<br>014<br>345<br>9 | 3.70<br>41E-05            | Acinetobacter_towneri                        | 0.00<br>036<br>841<br>5 | 9.51<br>243<br>E-05     |
| ASV_1161                                             | 0.00<br>113             | 0.00<br>013             | Methylobacterium_isbillense                      | 0.00<br>131             | 0.00<br>033             | Ferruginibacter_uncultured_Chitinophaga                            | 0.00<br>080             | 0.00<br>020             | Pseudopropionibacterium_sp.                                        | 0.00<br>102             | 0.00<br>019             | Catonella_sp.                                                      | 0.00<br>013             | 3.43<br>952               | ASV_4143                                     | 0.00<br>036             | 7.60<br>862             |

|                                                           |                         |                         |                                                   |                    |                    |                                                       |                    |                    |                                                                    |                    |                    |                                                                    |                         |                         |                                                   |                    |                         |
|-----------------------------------------------------------|-------------------------|-------------------------|---------------------------------------------------|--------------------|--------------------|-------------------------------------------------------|--------------------|--------------------|--------------------------------------------------------------------|--------------------|--------------------|--------------------------------------------------------------------|-------------------------|-------------------------|---------------------------------------------------|--------------------|-------------------------|
|                                                           | 709<br>8                | 200<br>4                |                                                   | 252<br>7           | 889<br>3           |                                                       | 203<br>2           | 708<br>4           |                                                                    | 925<br>9           | 892<br>7           |                                                                    | 321<br>2                | E-<br>05                |                                                   | 395<br>5           | E-<br>05                |
| Rhodanobacteraceae_uncultured_Lysobacter_sp.              | 0.00<br>113<br>227      | 0.00<br>029<br>235      | Moheibacter_uncultured_bacterium                  | 0.00<br>129<br>802 | 0.00<br>033<br>514 | ASV_2061                                              | 0.00<br>079<br>941 | 0.00<br>011<br>013 | Meiothermus_sp.                                                    | 0.00<br>100<br>510 | 0.00<br>025<br>951 | Haemophilus_sp.                                                    | 0.00<br>012<br>568      | 3.24<br>517<br>E-<br>05 | Peptostreptococcus_sp.                            | 0.00<br>035<br>997 | 9.29<br>441<br>E-<br>05 |
| ASV_2103                                                  | 0.00<br>112<br>986<br>1 | 0.00<br>019<br>869<br>8 | ASV_3161                                          | 0.00<br>124<br>809 | 0.00<br>032<br>025 | Solirubrobacter_uncultured_Solirubrobacter            | 0.00<br>079<br>528 | 0.00<br>020<br>524 | Nosocomiicoccus_uncultured_bacterium                               | 0.00<br>100<br>510 | 0.00<br>025<br>951 | Oribacterium_sp.                                                   | 0.00<br>012<br>568      | 3.24<br>517<br>E-<br>05 | Cellvibrio_uncultured_Cellvibrio                  | 0.00<br>035<br>578 | 8.61<br>825<br>E-<br>05 |
| Actinomycetaceae_F0332unidentified                        | 0.00<br>112<br>559<br>8 | 0.00<br>029<br>062      | ASV_4673                                          | 0.00<br>122<br>066 | 0.00<br>028<br>583 | Corynebacterium_kropfenstedtii                        | 0.00<br>079<br>475 | 0.00<br>020<br>520 | Actinomycetaceae_uncultured_bacterium                              | 0.00<br>100<br>438 | 0.00<br>025<br>933 | Centipeda_sp.                                                      | 0.00<br>012<br>296      | 3.17<br>494<br>E-<br>05 | ASV_256                                           | 0.00<br>034<br>835 | 5.95<br>781<br>E-<br>05 |
| Fusobacterium_peridonticum                                | 0.00<br>112<br>559<br>8 | 0.00<br>029<br>062      | ASV_12731                                         | 0.00<br>120<br>134 | 0.00<br>031<br>018 | Sphingomonas_astaxanthinifaciens                      | 0.00<br>079<br>475 | 0.00<br>020<br>520 | ASV_5066                                                           | 0.00<br>098<br>723 | 0.00<br>021<br>447 | Anaeroglobus_geminatus                                             | 0.00<br>012<br>127      | 3.13<br>126<br>E-<br>05 | Butyrivibrio_Eubacterium_sp.                      | 0.00<br>034<br>682 | 6.50<br>469<br>E-<br>05 |
| Gammaproteobacteria_uncultured_sp.                        | 0.00<br>111<br>624<br>9 | 0.00<br>028<br>821      | ASV_3436                                          | 0.00<br>120<br>134 | 0.00<br>031<br>018 | Scardovia_wiggisiae                                   | 0.00<br>079<br>006 | 0.00<br>014<br>179 | Porphyromonas_catoniae                                             | 0.00<br>097<br>969 | 0.00<br>015<br>881 | Anaerovoracaceae_Family_XIII_UCG-006Peptostreptococaceae_bacterium | 0.00<br>012<br>110      | 1.88<br>601<br>E-<br>05 | Armatimonadales_uncultured_eubacterium            | 0.00<br>034<br>385 | 8.87<br>827<br>E-<br>05 |
| ASV_2850                                                  | 0.00<br>111<br>223<br>1 | 0.00<br>020<br>530<br>9 | Lactobacillus_perolensis                          | 0.00<br>116<br>669 | 0.00<br>030<br>123 | ASV_4746                                              | 0.00<br>077<br>737 | 0.00<br>020<br>071 | ASV_3630                                                           | 0.00<br>097<br>869 | 0.00<br>014<br>443 | Treponema_vincentii                                                | 0.00<br>011<br>721      | 3.02<br>643<br>E-<br>05 | ASV_1592                                          | 0.00<br>034<br>113 | 3.76<br>87E-<br>05      |
| Leptospira_sp.                                            | 0.00<br>107<br>716<br>4 | 0.00<br>027<br>812      | ASV_2103                                          | 0.00<br>115<br>110 | 0.00<br>029<br>721 | Planctomyces_WD2101_soil_group_uncultured_plantomyces | 0.00<br>076<br>429 | 0.00<br>019<br>734 | ASV_13022                                                          | 0.00<br>097<br>352 | 0.00<br>025<br>136 | Alloprevotella_rava                                                | 0.00<br>011<br>132      | 2.87<br>43E-<br>05      | ASV_5620                                          | 0.00<br>032<br>327 | 3.96<br>421<br>E-<br>05 |
| Tetradontophora_bielanensis                               | 0.00<br>107<br>716<br>4 | 0.00<br>027<br>812      | CK-2C2-2_uncultured_organism                      | 0.00<br>115<br>110 | 0.00<br>029<br>721 | Howardella_sp.                                        | 0.00<br>075<br>724 | 0.00<br>011<br>121 | Cloacibacterium_sp.                                                | 0.00<br>097<br>352 | 0.00<br>025<br>136 | Prevotella_marshii                                                 | 0.00<br>010<br>787      | 2.28<br>032<br>E-<br>05 | Mycococcaceae_P30B-42_metagenome                  | 0.00<br>031<br>929 | 8.24<br>411<br>E-<br>05 |
| Pedospiraceae_uncultured_bacterium                        | 0.00<br>107<br>543<br>4 | 0.00<br>027<br>767      | Silanimonas_uncultured_bacterium                  | 0.00<br>111<br>188 | 0.00<br>028<br>708 | Legionella_norlandica                                 | 0.00<br>075<br>550 | 0.00<br>019<br>507 | ASV_2465                                                           | 0.00<br>096<br>488 | 0.00<br>016<br>988 | Actinomycetaceae_uncultured_bacterium                              | 0.00<br>010<br>595      | 2.73<br>585<br>E-<br>05 | Sediminibacterium_metagenome                      | 0.00<br>031<br>742 | 8.19<br>575<br>E-<br>05 |
| Woesearchaeales_GW2011_GWC1_47_15_sp.                     | 0.00<br>107<br>543<br>4 | 0.00<br>027<br>767      | ASV_15347                                         | 0.00<br>110<br>941 | 0.00<br>028<br>645 | Eubacterium_sp.                                       | 0.00<br>073<br>519 | 0.00<br>018<br>982 | Anoxybacillus_sp.                                                  | 0.00<br>096<br>424 | 0.00<br>024<br>896 | Solobacterium_uncultured_organism                                  | 0.00<br>010<br>065      | 2.59<br>888<br>E-<br>05 | ASV_2692                                          | 0.00<br>031<br>231 | 8.06<br>404<br>E-<br>05 |
| ASV_13432                                                 | 0.00<br>107<br>238<br>6 | 0.00<br>027<br>688      | Jeotgalbaca_uncultured_bacterium                  | 0.00<br>110<br>332 | 0.00<br>028<br>487 | Macrococcus_sp.                                       | 0.00<br>073<br>519 | 0.00<br>018<br>982 | Fibrobacteraceae_uncultured_Juncus_effusus                         | 0.00<br>096<br>424 | 0.00<br>024<br>896 | uncultured_Capnocytophaga                                          | 0.00<br>010<br>353      | 2.45<br>896<br>E-<br>05 | Rhizobiales_sp.                                   | 0.00<br>030<br>898 | 7.97<br>791<br>E-<br>05 |
| Demequina_sp.                                             | 0.00<br>106<br>601<br>1 | 0.00<br>027<br>524      | Microcoleus_PCC-7113_Microcoleus_sp.              | 0.00<br>110<br>332 | 0.00<br>028<br>487 | Deinococcus_antarcticus                               | 0.00<br>072<br>542 | 0.00<br>018<br>730 | Paenibacillus_metagenome                                           | 0.00<br>096<br>424 | 0.00<br>024<br>896 | ASV_2285                                                           | 0.00<br>009<br>426      | 2.43<br>389<br>E-<br>05 | Bacteroides_uncultured_bacterium                  | 0.00<br>030<br>854 | 7.96<br>665<br>E-<br>05 |
| Gordonia_sp.                                              | 0.00<br>104<br>040<br>2 | 0.00<br>026<br>863      | Curtobacterium_sp.                                | 0.00<br>107<br>991 | 0.00<br>027<br>883 | Desulfotuberciales_Tc1uncultured_Firmicutes           | 0.00<br>072<br>402 | 0.00<br>018<br>694 | Caenarcaniphilales_uncultured_Firmicutes                           | 0.00<br>095<br>109 | 0.00<br>024<br>557 | Selenomonadaceae_uncultured_Selenomonas_sp.                        | 0.00<br>008<br>738      | 2.25<br>619<br>E-<br>05 | Caulobacteraceae_PMMR1Caulobacter_sp.             | 0.00<br>030<br>854 | 7.96<br>665<br>E-<br>05 |
| PeredibacterPeredibacter_stamii                           | 0.00<br>104<br>040<br>2 | 0.00<br>026<br>863      | Eubacterium_coprostanoigenes_group_gut_metagenome | 0.00<br>091<br>991 | 0.00<br>027<br>883 | Propionivibrio_uncultured_soil                        | 0.00<br>072<br>402 | 0.00<br>018<br>694 | Gaiella_uncultured_actinobacterium                                 | 0.00<br>095<br>109 | 0.00<br>024<br>557 | Slackia_exigua                                                     | 0.00<br>008<br>287      | 1.23<br>839<br>E-<br>05 | Christensenellaceae_R7_group_uncultured_rumen     | 0.00<br>030<br>854 | 7.96<br>665<br>E-<br>05 |
| Solobacterium_mooriei                                     | 0.00<br>101<br>939<br>9 | 0.00<br>015<br>176      | Bacillus_infernus                                 | 0.00<br>106<br>947 | 0.00<br>027<br>613 | ASV_2850                                              | 0.00<br>071<br>496 | 0.00<br>011<br>008 | Sumeriaa_metagenome                                                | 0.00<br>093<br>332 | 0.00<br>024<br>098 | Oribacterium_uncultured_organism                                   | 0.00<br>005<br>662      | 1.19<br>765<br>E-<br>05 | Polyangia_sp.                                     | 0.00<br>030<br>854 | 7.96<br>665<br>E-<br>05 |
| Anaerolineaceae_uncultured_toluene-degrading_methanogenic | 0.00<br>101<br>544<br>3 | 0.00<br>026<br>218      | Physcisphaera_metagenome                          | 0.00<br>106<br>947 | 0.00<br>027<br>613 | ASV_8590                                              | 0.00<br>069<br>508 | 0.00<br>015<br>546 | Citritrimantans_uncultured_delta                                   | 0.00<br>093<br>007 | 0.00<br>024<br>014 | Capnocytophaga_haemolytica                                         | 0.00<br>008<br>769      | 8.13<br>210<br>E-<br>05 | Uliginosibacterium_sp.                            | 0.00<br>030<br>854 | 7.96<br>665<br>E-<br>05 |
| ASV_8760                                                  | 0.00<br>101<br>010<br>1 | 0.00<br>026<br>080<br>7 | ASV_8124                                          | 0.00<br>105<br>684 | 0.00<br>027<br>287 | Leptotrichia_shahii                                   | 0.00<br>068<br>879 | 0.00<br>016<br>305 | Leptotrichia_shahii                                                | 0.00<br>092<br>6   | 0.00<br>019<br>638 | Mycoplasma_spermatophilum                                          | 0.00<br>009<br>05       | 2.10<br>114<br>E-<br>05 | Blastocatellaceae_JG1_0001001-H03_sp.             | 0.00<br>030<br>781 | 7.94<br>77E-<br>05      |
| Anaerolineae_uncultured_bacterium                         | 0.00<br>100<br>994      | 0.00<br>026<br>076      | ASV_5802                                          | 0.00<br>104<br>813 | 0.00<br>020<br>650 | Acidimicrobia_uncultured_bacterium_YC-ZSS-LKJ199      | 0.00<br>066<br>836 | 0.00<br>017<br>257 | ASV_3228                                                           | 0.00<br>091<br>058 | 0.00<br>017<br>167 | ASV_2084                                                           | 0.00<br>005<br>05       | 2.08<br>066<br>E-<br>05 | SAR324_clade(Marine_group_B)_uncultured_soil      | 0.00<br>029<br>473 | 7.60<br>995<br>E-<br>05 |
| CL500-3_uncultured_bacterium                              | 0.00<br>100<br>994      | 0.00<br>026<br>076      | ASV_13525                                         | 0.00<br>104<br>646 | 0.00<br>027<br>019 | ASV_13011                                             | 0.00<br>066<br>229 | 0.00<br>017<br>100 | ASV_1208                                                           | 0.00<br>089<br>973 | 0.00<br>023<br>230 | Prevotellaunidentified                                             | 0.00<br>153<br>E-<br>05 | 2.05<br>308<br>E-<br>05 | ASV_4673                                          | 0.00<br>029<br>272 | 7.55<br>802<br>E-<br>05 |
| ASV_5948                                                  | 0.00<br>100<br>412<br>8 | 0.00<br>025<br>926      | ASV_2061                                          | 0.00<br>102<br>761 | 0.00<br>019<br>545 | Empedobacter_sp.                                      | 0.00<br>065<br>494 | 0.00<br>016<br>910 | ASV_7512                                                           | 0.00<br>088<br>388 | 0.00<br>022<br>821 | Actinomyces_dentalis                                               | 0.00<br>009<br>05       | 2.05<br>188<br>E-<br>05 | Saccharomonospora_sp.                             | 0.00<br>029<br>272 | 7.55<br>802<br>E-<br>05 |
| Chloroplast_Mykonastes_jurissii                           | 0.00<br>098<br>574      | 0.00<br>017<br>611      | Acidimicrobia_IMCC26256_metagenome                | 0.00<br>099<br>988 | 0.00<br>025<br>817 | Eubacterium_brachygroup_sp.                           | 0.00<br>062<br>958 | 0.00<br>016<br>255 | ASV_13900                                                          | 0.00<br>087<br>616 | 0.00<br>022<br>622 | Lawsonella_uncultured_bacterium                                    | 0.00<br>016<br>05       | 1.07<br>245<br>E-<br>05 | ASV_5322                                          | 0.00<br>029<br>071 | 7.50<br>618<br>E-<br>05 |
| ASV_12760                                                 | 0.00<br>097<br>924      | 0.00<br>025<br>283      | Lactobacillus_iners                               | 0.00<br>097<br>289 | 0.00<br>025<br>120 | Eubacterium_brachygroup_Eubacterium_sp.               | 0.00<br>062<br>215 | 0.00<br>016<br>063 | Jatrophihabitans_uncultured_actinobacterium                        | 0.00<br>087<br>616 | 0.00<br>022<br>622 | Saccharimonadales_TM7auncultured_Candidatus                        | 0.00<br>008<br>05       | 1.75<br>638<br>E-<br>05 | Pyrimonadaceae_RB41_metagenome                    | 0.00<br>029<br>071 | 7.50<br>618<br>E-<br>05 |
| Chitinophagales_uncultured_bacterium                      | 0.00<br>097<br>924      | 0.00<br>025<br>283      | ASV_16467                                         | 0.00<br>097<br>073 | 0.00<br>025<br>064 | ASV_5922                                              | 0.00<br>061<br>732 | 0.00<br>015<br>939 | Solirubrobacteraceae_uncultured_metagenome                         | 0.00<br>087<br>616 | 0.00<br>022<br>622 | Gemella_sp.                                                        | 0.00<br>022<br>05       | 1.74<br>961<br>E-<br>05 | Tyzzerella_uncultured_Firmicutes                  | 0.00<br>029<br>071 | 7.50<br>618<br>E-<br>05 |
| Rhodoplanes_sp.                                           | 0.00<br>097<br>924      | 0.00<br>025<br>283      | Candidatus_Nomura_bacteria_Parcubacter_bacterium  | 0.00<br>097<br>073 | 0.00<br>025<br>064 | Oscillospiraceae_UCG-007_uncultured_rumen             | 0.00<br>061<br>732 | 0.00<br>015<br>939 | Roseburia_Lachnospiraceae_bacterium                                | 0.00<br>087<br>616 | 0.00<br>022<br>622 | Anaerolineaceae_bacterium                                          | 0.00<br>008<br>05       | 1.70<br>243<br>E-<br>05 | Luteococcus_sp.                                   | 0.00<br>029<br>071 | 7.48<br>803<br>E-<br>05 |
| Thermoleophilia_uncultured_Conexibacter                   | 0.00<br>097<br>924      | 0.00<br>025<br>283      | Glutamicibacter_uncultured_bacterium              | 0.00<br>097<br>073 | 0.00<br>025<br>064 | Gracilibacteria_Gracilibacteria_bacterium             | 0.00<br>061<br>192 | 0.00<br>015<br>799 | Corynebacterium_amycolatum                                         | 0.00<br>087<br>194 | 0.00<br>022<br>513 | Treponema_refringens                                               | 0.00<br>021<br>05       | 1.70<br>236<br>E-<br>05 | ASV_1777                                          | 0.00<br>028<br>114 | 4.40<br>594<br>E-<br>05 |
| Candidatus_Limnoluna_uncultured_bacterium                 | 0.00<br>096<br>931<br>1 | 0.00<br>021<br>954      | Roseimarinus_metagenome                           | 0.00<br>096<br>107 | 0.00<br>024<br>814 | Candidatus_Solobacterium_sp.                          | 0.00<br>060<br>152 | 0.00<br>015<br>531 | Sphingobacteriales_NS11-12_marine_groupuncultured_Sphingobacterium | 0.00<br>087<br>194 | 0.00<br>022<br>513 | Prevotella_sp.                                                     | 0.00<br>008<br>05       | 1.64<br>246<br>E-<br>05 | Acidimicrobia_IMCC26256uncultured_Aciditerrimonas | 0.00<br>027<br>645 | 7.13<br>814<br>E-<br>05 |
| Ferritrophicum_uncultured_Rhodocyclaceae                  | 0.00<br>096<br>514<br>7 | 0.00<br>024<br>92       | Candidatus_Flaviluna_bacterium                    | 0.00<br>096<br>046 | 0.00<br>024<br>799 | Winkia_neuui                                          | 0.00<br>060<br>152 | 0.00<br>015<br>531 | Kiritimatiellae_WCHB1-41uncultured_prokaryote                      | 0.00<br>087<br>184 | 0.00<br>022<br>510 | Johnsonella_uncultured_bacterium                                   | 0.00<br>008<br>05       | 1.62<br>259<br>E-<br>05 | Cellvibrio_uncultured_gamma                       | 0.00<br>027<br>645 | 7.13<br>814<br>E-<br>05 |
| Roseiflexaceae_uncultured_bacterium                       | 0.00<br>095<br>068<br>3 | 0.00<br>024<br>546      | Candidatus_Hamiltonella_sp.                       | 0.00<br>095<br>992 | 0.00<br>024<br>785 | Treponema_lectithinolyticum                           | 0.00<br>059<br>394 | 0.00<br>015<br>6   | ASV_12772                                                          | 0.00<br>085<br>984 | 0.00<br>022<br>201 | ASV_1071                                                           | 0.00<br>005<br>05       | 1.57<br>586<br>E-<br>05 | ASV_11581                                         | 0.00<br>026<br>770 | 6.91<br>204<br>E-<br>05 |
| Corynebacterium_amycolatum                                | 0.00<br>094<br>913<br>7 | 0.00<br>021<br>820      | Lenti-02_metagenome                               | 0.00<br>095<br>992 | 0.00<br>024<br>785 | ASV_13883                                             | 0.00<br>059<br>606 | 0.00<br>015<br>390 | Prevotellaceae_UCG-003_sp.                                         | 0.00<br>085<br>984 | 0.00<br>022<br>201 | Porphyromonas_uenonis                                              | 0.00<br>027<br>05       | 1.57<br>586<br>E-<br>05 | Peptococcus_sp.                                   | 0.00<br>025<br>996 | 5.28<br>396<br>E-<br>05 |
| Treponema_stenostriptum                                   | 0.00<br>093             | 0.00<br>024<br>219      | Methylbacterium_hispanicum                        | 0.00<br>095        | 0.00<br>024        | Stomatobaculum_sp.                                    | 0.00<br>059        | 0.00<br>015        | Actinomyces_dentalis                                               | 0.00<br>085        | 0.00<br>017        | Fusobacterium_sp.                                                  | 0.00<br>5.82<br>547     | 1.50<br>413             | ASV_18970                                         | 0.00<br>025        | 6.63<br>886             |

|                                                       | 799<br>8                       |                         | 992<br>3                                            | 785<br>1                       |                         | 538<br>6                                                | 372<br>8                |                          | 161<br>4                                        | 742<br>1                  |                         | E-<br>05                                         | E-<br>05                   |                     | 712<br>2                                         | E-<br>05                   |                     |
|-------------------------------------------------------|--------------------------------|-------------------------|-----------------------------------------------------|--------------------------------|-------------------------|---------------------------------------------------------|-------------------------|--------------------------|-------------------------------------------------|---------------------------|-------------------------|--------------------------------------------------|----------------------------|---------------------|--------------------------------------------------|----------------------------|---------------------|
| ASV_17824                                             | 0.00<br>092<br>180<br>800<br>1 | 0.00<br>023<br>800<br>1 | Pseudoxanthomonas_metagenome                        | 0.00<br>095<br>992<br>932<br>1 | 0.00<br>024<br>785      | Cytophagales_sp.                                        | 0.00<br>059<br>446<br>2 | 0.00<br>014<br>318<br>9  | Chloroplast_Melosira                            | 0.00<br>083<br>307        | 0.00<br>014<br>964<br>1 | Lachnospiraceae_uncultured_sp.                   | 5.12<br>805<br>E-05        | 1.32<br>406<br>E-05 | Bacteriovoracaceae_uncultured_delta              | 0.00<br>025<br>712<br>E-05 | 6.63<br>886<br>E-05 |
| ASV_17828                                             | 0.00<br>092<br>180<br>800<br>1 | 0.00<br>023<br>800<br>1 | Actinobacteria_PeM15uncultured_actinobacterium      | 0.00<br>094<br>181<br>7        | 0.00<br>024<br>317<br>6 | Lachnospiraceae_NK3A20_group_uncultured_Lachnospiraceae | 0.00<br>059<br>446<br>2 | 0.00<br>015<br>348<br>9  | Alistipes_gut_metagenome                        | 0.00<br>082<br>653<br>341 | 0.00<br>021<br>341      | Leptotrichia_goodfellowii                        | 5.12<br>805<br>E-05        | 1.32<br>406<br>E-05 | CCM19a_uncultured_bacterium                      | 0.00<br>025<br>712<br>E-05 | 6.63<br>886<br>E-05 |
| Nitrosomonadaceae_GOUTA6_uncultured_bacterium         | 0.00<br>092<br>180<br>800<br>1 | 0.00<br>023<br>800<br>1 | Physiococcus_sp.                                    | 0.00<br>094<br>181<br>7        | 0.00<br>024<br>317<br>6 | Gemmobacter_sp.                                         | 0.00<br>059<br>446<br>2 | 0.00<br>015<br>348<br>9  | Bdellovibrio_uncultured_red_soil                | 0.00<br>082<br>653<br>341 | 0.00<br>021<br>341      | Corynebacterium_amicolatum                       | 5.03<br>271<br>E-05        | 1.29<br>944<br>E-05 | Luteibacter_sp.                                  | 0.00<br>025<br>712<br>E-05 | 6.63<br>886<br>E-05 |
| Flavobacterium_unidentified                           | 0.00<br>091<br>589<br>3        | 0.00<br>016<br>916<br>3 | BSV13_uncultured_bacterium                          | 0.00<br>093<br>411<br>7        | 0.00<br>024<br>118<br>8 | Slackia_exigua                                          | 0.00<br>057<br>594<br>5 | 9.63<br>012<br>E-05      | ASV_1592                                        | 0.00<br>082<br>629<br>6   | 0.00<br>012<br>333<br>3 | Streptococcus_sp.                                | 5.03<br>271<br>E-05        | 1.29<br>944<br>E-05 | Olsenella_uncultured_rumen                       | 0.00<br>025<br>712<br>E-05 | 6.63<br>886<br>E-05 |
| Ralstonia_sp.                                         | 0.00<br>091<br>331<br>5        | 0.00<br>019<br>920<br>2 | Eubacterium_coprostanoligenes_group_human_gut       | 0.00<br>093<br>411<br>7        | 0.00<br>024<br>118<br>8 | Azospirillaceae_sp.                                     | 0.00<br>057<br>159<br>8 | 0.00<br>014<br>758<br>6  | Bacteroidales_M2PB4-65_termite_group_metagenome | 0.00<br>081<br>381<br>2   | 0.00<br>021<br>012<br>5 | Cardiobacterium_valvarum                         | 4.85<br>456<br>E-05        | 1.25<br>344<br>E-05 | Runella_slitthyiformis                           | 0.00<br>025<br>712<br>E-05 | 6.63<br>886<br>E-05 |
| ASV_164                                               | 0.00<br>090<br>200<br>9        | 0.00<br>023<br>289<br>8 | Sphingomonadaceae_uncultured_alpha_proteobacterium  | 0.00<br>090<br>861<br>4        | 0.00<br>023<br>460<br>4 | Kiloniella_sp.                                          | 0.00<br>057<br>159<br>8 | 0.00<br>014<br>758<br>6  | Oligoflexales_uncultured_uncultured_soil        | 0.00<br>080<br>353<br>6   | 0.00<br>020<br>747<br>2 | Firmicutes_sp.                                   | 0.00<br>004<br>713<br>E-05 | 1.21<br>694<br>E-05 | ASV_12313                                        | 0.00<br>024<br>539<br>E-05 | 6.63<br>602<br>E-05 |
| Hydrogencedensaceae_metagenome                        | 0.00<br>090<br>200<br>9        | 0.00<br>023<br>289<br>8 | Faecalibacterium_metagenome                         | 0.00<br>086<br>754<br>6        | 0.00<br>021<br>437<br>8 | Sphingomonas_phyllosphaerae                             | 0.00<br>057<br>159<br>8 | 0.00<br>014<br>758<br>6  | Absconditabacteriales_(SR1)_uncultured_organism | 0.00<br>079<br>976        | 0.00<br>020<br>649<br>7 | ASV_6                                            | 4.59<br>079<br>E-05        | 8.18<br>652<br>E-06 | ASV_4520                                         | 0.00<br>024<br>539<br>E-05 | 6.63<br>602<br>E-05 |
| Rubrobacter_uncultured_Rubrobacter                    | 0.00<br>090<br>200<br>9        | 0.00<br>023<br>289<br>8 | Ketobacter_uncultured_d_soil                        | 0.00<br>084<br>094<br>2        | 0.00<br>021<br>713      | ASV_10003                                               | 0.00<br>056<br>253<br>5 | 0.00<br>014<br>524<br>6  | Flavohumibacter_uncultured_bacterium            | 0.00<br>079<br>976        | 0.00<br>020<br>649<br>7 | Blivit28_wastewater-sludge_group_sp.             | 4.39<br>548<br>E-05        | 1.13<br>491<br>E-05 | ASV_4506                                         | 0.00<br>024<br>422<br>E-05 | 6.30<br>573<br>E-05 |
| Coriobacteria_OPB41_uncultured_soil                   | 0.00<br>088<br>913<br>6        | 0.00<br>019<br>311<br>3 | Rhizobiales_Incertae_Sedis_uncultured_bacterium     | 0.00<br>084<br>094<br>2        | 0.00<br>021<br>713      | ASV_10004                                               | 0.00<br>056<br>253<br>5 | 0.00<br>014<br>524<br>6  | Campylobacter_concivarius                       | 0.00<br>078<br>542<br>3   | 0.00<br>014<br>268<br>1 | Tannerella_forsythia                             | 3.71<br>885<br>E-06        | 9.60<br>203<br>E-06 | Nannocystis_exedens                              | 0.00<br>024<br>393<br>E-05 | 6.29<br>835<br>E-05 |
| Fimbrimonadaceae_sp.                                  | 0.00<br>088<br>131<br>6        | 0.00<br>022<br>755<br>5 | Rickettsiales_SM2D12uncultured_Bradyrhizobium       | 0.00<br>084<br>094<br>2        | 0.00<br>021<br>713      | Elusimicrobiota_Lineage_IIa_metagenome                  | 0.00<br>056<br>142<br>3 | 0.00<br>014<br>495<br>9  | ASV_14881                                       | 0.00<br>077<br>881<br>6   | 0.00<br>020<br>108<br>9 | Erysipelotrichaceae_UCG-006_uncultured_bacterium | 0.00<br>003<br>662<br>E-06 | 9.45<br>757<br>E-06 | ASV_2303                                         | 0.00<br>024<br>261<br>E-05 | 4.30<br>837<br>E-05 |
| Bergeyella_uncultured_bacterium                       | 0.00<br>086<br>700<br>2        | 0.00<br>022<br>385<br>9 | ASV_15928                                           | 0.00<br>083<br>993<br>3        | 0.00<br>021<br>687      | ASV_7817                                                | 0.00<br>055<br>802<br>4 | 0.00<br>014<br>018<br>08 | Inquinus_sp.                                    | 0.00<br>077<br>881<br>6   | 0.00<br>020<br>108<br>9 | Anaerovoracaceae_sp.                             | 3.18<br>061<br>E-05        | 8.21<br>23E-06      | ASV_2862                                         | 0.00<br>023<br>695<br>E-05 | 5.30<br>332<br>E-05 |
| Xanthobacteraceae_uncultured_sp.                      | 0.00<br>086<br>700<br>2        | 0.00<br>022<br>385<br>9 | Enterococcus_sp.                                    | 0.00<br>083<br>993<br>3        | 0.00<br>021<br>687      | Pseudoxanthomonas_mexicana                              | 0.00<br>055<br>802<br>4 | 0.00<br>014<br>018<br>08 | Oligoflexus_uncultured_delta                    | 0.00<br>077<br>740<br>7   | 0.00<br>014<br>170<br>4 | Prevotella_oris                                  | 3.18<br>061<br>E-05        | 8.21<br>23E-06      | Thiothrix_sp.                                    | 0.00<br>022<br>589<br>E-05 | 5.83<br>245<br>E-05 |
| Larkinella_metagenome                                 | 0.00<br>086<br>334<br>3        | 0.00<br>022<br>291<br>3 | Holophagaceae_uncultured_bacterium                  | 0.00<br>083<br>717<br>1        | 0.00<br>021<br>615<br>6 | Rhodomicrobium_uncultured_bacterium                     | 0.00<br>054<br>873<br>4 | 0.00<br>014<br>168<br>3  | Ignavibacteria_sp.                              | 0.00<br>077<br>386<br>1   | 0.00<br>019<br>981      | Prevotellaceae_uncultured_Prevotella             | 3.18<br>061<br>E-05        | 8.21<br>23E-06      | Prevotella_nigrescens                            | 0.00<br>022<br>564<br>E-05 | 3.12<br>314<br>E-05 |
| Oligoflexales_uncultured_soil                         | 0.00<br>086<br>170<br>3        | 0.00<br>015<br>322<br>1 | Marmoricola_sp.                                     | 0.00<br>083<br>206<br>7        | 0.00<br>021<br>483<br>7 | ASV_1592                                                | 0.00<br>054<br>E-02     | 8.20<br>965<br>E-05      | Johnsonella_sp.                                 | 0.00<br>077<br>386<br>1   | 0.00<br>019<br>981      | Freitbacteriumuncultured_Freitbacterium          | 5.47<br>078<br>E-06        | 5.38<br>078<br>E-06 | ASV_3526                                         | 0.00<br>022<br>308<br>E-05 | 5.76<br>003<br>E-05 |
| Nosocomiococcus_a_mputalae                            | 0.00<br>085<br>536<br>8        | 0.00<br>022<br>085<br>5 | Prevotellaceae_sp.                                  | 0.00<br>083<br>206<br>7        | 0.00<br>021<br>483<br>7 | ASV_8922                                                | 0.00<br>053<br>7<br>4   | 0.00<br>013<br>817<br>6  | Spirochaetaceae_uncultured_metagenome           | 0.00<br>077<br>386<br>1   | 0.00<br>019<br>981      | Anaerococcus_octavius                            | 2.92<br>539<br>E-06        | 7.55<br>332<br>E-06 | Chloroplast_uncultured_diatom                    | 0.00<br>022<br>231<br>E-05 | 5.74<br>002<br>E-05 |
| ASV_3100                                              | 0.00<br>084<br>620<br>3        | 0.00<br>021<br>848<br>9 | Paenibacillus_taihuensis                            | 0.00<br>080<br>038<br>4        | 0.00<br>020<br>665<br>8 | ASV_14482                                               | 0.00<br>053<br>468<br>8 | 0.00<br>013<br>805<br>6  | bacteriap25_uncultured_bacterium                | 0.00<br>077<br>315<br>6   | 0.00<br>019<br>962<br>8 | Prevotella_olorum                                | 2.92<br>539<br>E-06        | 7.55<br>332<br>E-06 | Mycoplasmataceae_genomosp.                       | 0.00<br>022<br>231<br>E-05 | 5.74<br>002<br>E-05 |
| Chryseobacterium_takimakanense                        | 0.00<br>084<br>620<br>3        | 0.00<br>021<br>848<br>9 | Candidatus_Xiphine_matabacter_uncultured_Candidatus | 0.00<br>079<br>057<br>4        | 0.00<br>020<br>644<br>9 | Bifidobacteriaceae_uncultured_sp.                       | 0.00<br>053<br>468<br>8 | 0.00<br>013<br>805<br>6  | Chamaesiphon_PCC-7430_sp.                       | 0.00<br>077<br>315<br>6   | 0.00<br>019<br>962<br>8 | Peptoniphilus_lacrimalis                         | 2.91<br>273<br>E-06        | 7.52<br>064<br>E-06 | Elusimicrobia_MVP-88_sp.                         | 0.00<br>022<br>219<br>E-05 | 5.73<br>702<br>E-05 |
| Oligoflexus_uncultured_delta                          | 0.00<br>084<br>091<br>3        | 0.00<br>014<br>872<br>2 | ASV_2510                                            | 0.00<br>077<br>705<br>4        | 0.00<br>014<br>446<br>1 | Magnetospirillaceaeuncultured_proteobacterium           | 0.00<br>053<br>468<br>8 | 0.00<br>013<br>805<br>6  | ASV_3256                                        | 0.00<br>075<br>258<br>4   | 0.00<br>019<br>431<br>6 | Olsenella_genomosp.                              | 2.84<br>848<br>E-05        | 7.35<br>474<br>E-06 | ASV_13612                                        | 0.00<br>022<br>104<br>E-05 | 5.70<br>746<br>E-05 |
| Pseudalteromonas_sp.                                  | 0.00<br>084<br>419<br>8        | 0.00<br>021<br>797<br>1 | ASV_5779                                            | 0.00<br>076<br>195<br>2        | 0.00<br>017<br>864<br>2 | Pseudorhodoplanes_p.                                    | 0.00<br>053<br>468<br>8 | 0.00<br>013<br>805<br>6  | Cupriavidus_sp.                                 | 0.00<br>072<br>321<br>5   | 0.00<br>018<br>673<br>3 | Stomatobaculum_Eubacterium_sp.                   | 2.64<br>897<br>E-06        | 6.83<br>961<br>E-06 | Acidovorax_sp.                                   | 0.00<br>021<br>161<br>E-05 | 5.46<br>382<br>E-05 |
| WOR-1_sp.                                             | 0.00<br>082<br>346<br>9        | 0.00<br>021<br>261<br>5 | Streptococcus_mutan_s                               | 0.00<br>074<br>026<br>9        | 0.00<br>019<br>268<br>6 | Rhizobiales_A0839_uncultured_bacterium                  | 0.00<br>053<br>468<br>8 | 0.00<br>013<br>805<br>6  | Meiothermus_uncultured_bacterium                | 0.00<br>072<br>318<br>2   | 0.00<br>018<br>672<br>5 | Granulicatella_sp.                               | 2.04<br>941<br>E-05        | 5.29<br>155<br>E-06 | ASV_5801                                         | 0.00<br>021<br>141<br>E-05 | 5.45<br>858<br>E-05 |
| ASV_13403                                             | 0.00<br>082<br>000<br>8        | 0.00<br>021<br>172<br>5 | Saccharofermentans_uncultured_microorganism         | 0.00<br>073<br>252<br>4        | 0.00<br>018<br>913<br>7 | Solirubrobacteraceae_uncultured_Phytoblastoma_sp.       | 0.00<br>053<br>468<br>8 | 0.00<br>013<br>805<br>6  | Aeromonas_metagenome                            | 0.00<br>071<br>332<br>3   | 0.00<br>018<br>417<br>9 | Porphyromonas_sp.                                | 1.94<br>182<br>E-05        | 5.01<br>376<br>E-06 | ASV_20250                                        | 0.00<br>020<br>569<br>E-05 | 5.31<br>11E-05      |
| ASV_13405                                             | 0.00<br>082<br>000<br>8        | 0.00<br>021<br>172<br>5 | Rhodospirillaceae_uncultured_bacterium              | 0.00<br>072<br>918<br>2        | 0.00<br>018<br>827<br>4 | Aminobacter_sp.                                         | 0.00<br>052<br>983<br>6 | 0.00<br>013<br>680<br>3  | Legionellaceae_uncultured_bacterium             | 0.00<br>069<br>979        | 0.00<br>018<br>068<br>5 | ASV_9                                            | 1.85<br>943<br>E-05        | 4.80<br>103<br>E-06 | ASV_2249                                         | 0.00<br>020<br>569<br>E-05 | 5.31<br>11E-05      |
| Elusimicrobiota_Lineage_IIauncultured_actinobacterium | 0.00<br>082<br>000<br>8        | 0.00<br>021<br>172<br>5 | ASV_2850                                            | 0.00<br>072<br>602<br>6        | 0.00<br>013<br>611<br>6 | Spirosoma_uncultured_Bacteroidetes                      | 0.00<br>052<br>983<br>6 | 0.00<br>013<br>680<br>3  | ASV_14382                                       | 0.00<br>069<br>584        | 0.00<br>017<br>966<br>5 | ASV_2888                                         | 1.46<br>516<br>E-05        | 3.78<br>303<br>E-06 | Azospirillaceae_uncultured_metagenome            | 0.00<br>020<br>569<br>E-05 | 5.31<br>11E-05      |
| Planctopirus_uncultured_planctomycete                 | 0.00<br>082<br>000<br>8        | 0.00<br>021<br>172<br>5 | Anaerobiospirillum_succinicoproductens              | 0.00<br>072<br>080<br>5        | 0.00<br>018<br>611<br>2 | ASV_5304                                                | 0.00<br>052<br>587<br>1 | 0.00<br>013<br>577<br>9  | Chloroflexi_KD4-96uncultured_Chloroflexi        | 0.00<br>068<br>787<br>6   | 0.00<br>017<br>760<br>9 | Catonella_unidentified                           | 1.46<br>516<br>E-05        | 3.78<br>303<br>E-06 | Chloroplast_Guillardia_theta                     | 0.00<br>020<br>569<br>E-05 | 5.31<br>11E-05      |
| Stenotrophomonas_nitrireducens                        | 0.00<br>082<br>000<br>8        | 0.00<br>021<br>172<br>5 | ASV_10613                                           | 0.00<br>072<br>080<br>7        | 0.00<br>018<br>611<br>2 | ASV_3349                                                | 0.00<br>052<br>503<br>1 | 0.00<br>013<br>556<br>9  | Edaphobaculum_uncultured_Chitinophaga           | 0.00<br>068<br>787<br>6   | 0.00<br>017<br>760<br>9 | Eubacterium_brachygroup_Eubacterium_sp.          | 1.46<br>516<br>E-05        | 3.78<br>303<br>E-06 | Cyclobacteriaceae_sp                             | 0.00<br>020<br>569<br>E-05 | 5.31<br>11E-05      |
| Herpetosiphon_sp.                                     | 0.00<br>079<br>831<br>6        | 0.00<br>020<br>612<br>4 | Enterococcus_cecorum                                | 0.00<br>071<br>994<br>2        | 0.00<br>018<br>588<br>8 | Roseomonas_metagenome                                   | 0.00<br>052<br>503<br>3 | 0.00<br>013<br>556<br>9  | Flavobacterium_lacicola                         | 0.00<br>068<br>787<br>6   | 0.00<br>017<br>760<br>9 | Saccharimonadales_TM7a_uncultured_bacterium      | 1.46<br>516<br>E-05        | 3.78<br>303<br>E-06 | Elusimicrobiota_Lineage_IIc_uncultured_bacterium | 0.00<br>020<br>569<br>E-05 | 5.31<br>11E-05      |
| PRD18C08_uncultured_bacterium                         | 0.00<br>079<br>831<br>6        | 0.00<br>020<br>612<br>4 | ASV_8228                                            | 0.00<br>071<br>432<br>5        | 0.00<br>018<br>443<br>8 | Eubacterium_brachygroup_uncultured_bacterium            | 0.00<br>051<br>459<br>6 | 0.00<br>013<br>286<br>8  | Metamycoasma_salivarium                         | 0.00<br>068<br>324<br>6   | 9.28<br>502<br>E-05     | Anaerococcusuncultured_organism                  | 1.46<br>269<br>E-05        | 3.77<br>665<br>E-06 | Blastocatella_uncultured_bacterium               | 0.00<br>020<br>520<br>E-05 | 5.29<br>847<br>E-05 |
| Candidatus_Limnoluna_sp.                              | 0.00<br>079<br>733<br>3        | 0.00<br>020<br>587      | Microtrichales_uncultured_Lamiaceae                 | 0.00<br>071<br>391<br>5        | 0.00<br>018<br>433<br>2 | Flavobacterium_rivulii                                  | 0.00<br>051<br>459<br>6 | 0.00<br>013<br>286<br>8  | ASV_15912                                       | 0.00<br>068<br>146<br>4   | 0.00<br>017<br>595<br>3 | 009E01-B-SD-P15_uncultured_bacterium             | 0                          | 0                   | Gailliales_uncultured_Rubrobacteria              | 0.00<br>020<br>520<br>E-05 | 5.29<br>847<br>E-05 |
| Chloroplast_Taxus_mairei                              | 0.00<br>079<br>732<br>1        | 0.00<br>020<br>586<br>7 | Rikenellaceae_uncultured_sp.                        | 0.00<br>071<br>391<br>5        | 0.00<br>018<br>433<br>2 | Paracaeobacteraceae_uncultured_metagenome               | 0.00<br>051<br>459<br>6 | 0.00<br>013<br>286<br>8  | Eubacterium_brachygroup_uncultured_Firmicutes   | 0.00<br>068<br>146<br>4   | 0.00<br>017<br>595<br>3 | 1013-28-CG33_uncultured_soil                     | 0                          | 0                   | ASV_8157                                         | 0.00<br>020<br>103<br>E-05 | 5.19<br>065<br>E-05 |
| Anaerovorax_sp.                                       | 0.00<br>078<br>339<br>2        | 0.00<br>020<br>227<br>1 | Saprosiraceae_uncultured_Devosia                    | 0.00<br>071<br>391<br>5        | 0.00<br>018<br>433<br>2 | Saccharimonadales_TM7aTM7_phytum                        | 0.00<br>051<br>459<br>6 | 0.00<br>013<br>286<br>8  | Bilophila_sp.                                   | 0.00<br>067<br>199<br>3   | 0.00<br>017<br>350<br>8 | Abitidbacterium_sp.                              | 0                          | 0                   | Polymorphobacter_uncultured_Sphingomonas         | 0.00<br>020<br>103<br>E-05 | 5.19<br>065<br>E-05 |

|                                                       |                              |                             |                                               |                          |                        |                                                |                          |                        |                                                      |                          |                        |                                                              |   |   |                                                    |                        |                     |
|-------------------------------------------------------|------------------------------|-----------------------------|-----------------------------------------------|--------------------------|------------------------|------------------------------------------------|--------------------------|------------------------|------------------------------------------------------|--------------------------|------------------------|--------------------------------------------------------------|---|---|----------------------------------------------------|------------------------|---------------------|
| Chloroplast_uncultured_Cryptomonadaceae               | 0.007<br>0.078<br>0.339<br>2 | 0.00<br>0.020<br>0.227<br>1 | Flaviaestuariibacter_sp.                      | 0.00069<br>0.017492<br>7 | 0.00017<br>0.0942<br>9 | ASV_2386                                       | 0.00051<br>0.0419<br>5   | 0.000<br>6<br>635<br>2 | Chelativoransuncultured_Alphaproteobacteria          | 0.00064<br>0.016282<br>8 | 0.00016<br>0.0597<br>7 | Absconditabacteriales_(SR1)_metagenome                       | 0 | 0 | Babeliales_UBA1241_1_uncultured_bacterium          | 0.00020<br>0.0776<br>6 | 5.18<br>401<br>E-05 |
| Myroides_sp.                                          | 0.00078<br>0.339<br>2        | 0.00020<br>0.227<br>1       | Cloacibacterium_sp.                           | 0.00069<br>0.017338<br>5 | 0.00017<br>0.0903<br>1 | Cutibacterium_granulosum                       | 0.00051<br>0.0155<br>1   | 7.49<br>0.032<br>E-05  | Advenella_sp.                                        | 0.00063<br>0.016942<br>3 | 0.00016<br>0.0509<br>8 | Absconditabacteriales_(SR1)_uncultured_bacterium             | 0 | 0 | Clostridia_UCG-014undidentified_rumen              | 0.00020<br>0.0776<br>6 | 5.18<br>401<br>E-05 |
| Rhizobacter_sp.                                       | 0.00078<br>0.339<br>2        | 0.00020<br>0.227<br>1       | Desulfobulbus_uncultured_Desulfobulbus        | 0.00069<br>0.017338<br>5 | 0.00017<br>0.0903<br>1 | Methylophilaceae_uncultured_candidate_division | 0.00050<br>0.01953<br>3  | 0.00013<br>0.156<br>1  | Filifactor_alois                                     | 0.00063<br>0.016942<br>3 | 0.00016<br>0.0509<br>8 | Absconditabacteriales_(SR1)_candidate_division               | 0 | 0 | Corynebacterium_glutamicum                         | 0.00020<br>0.0776<br>6 | 5.18<br>401<br>E-05 |
| Leeia_uncultured_bacterium                            | 0.00077<br>0.184<br>4        | 0.00012<br>0.280<br>4       | Anaeromusa-Anaerococcus_sp.                   | 0.00066<br>0.017659<br>3 | 0.00017<br>0.211<br>4  | ASV_2160                                       | 0.00050<br>0.02285<br>3  | 6.22<br>0.052<br>E-05  | ASV_8997                                             | 0.00063<br>0.016386<br>9 | 0.00016<br>0.0386<br>9 | Absconditabacteriales_(SR1)_sp.                              | 0 | 0 | Steroidobacteraceae_uncultured_Hypsibius_dujardini | 0.00020<br>0.0776<br>6 | 5.18<br>401<br>E-05 |
| Acholeplasma_laidlawii                                | 0.00076<br>0.916<br>7        | 0.00019<br>0.834<br>7       | ASV_17312                                     | 0.00066<br>0.017659<br>3 | 0.00017<br>0.211<br>4  | ASV_9358                                       | 0.00050<br>0.03636<br>7  | 0.00013<br>0.004<br>6  | Aquabacterium_sp.                                    | 0.00061<br>0.016989<br>9 | 0.00016<br>0.005<br>9  | Absconditabacteriales_(SR1)_SR1_bacterium                    | 0 | 0 | SBR1031anaerobic_bacterium                         | 0.00019<br>0.660<br>9  | 5.07<br>642<br>E-05 |
| Antriccoccus_suffuscus                                | 0.00076<br>0.816<br>7        | 0.00019<br>0.834<br>7       | Iodobacter_uncultured_beta                    | 0.00065<br>0.017937<br>7 | 0.00017<br>0.025<br>4  | Chloroflexaceae_FFC_H7168uncultured_compost    | 0.00050<br>0.01300<br>7  | 0.00012<br>0.987<br>6  | Methylophilaceae_uncultured_beta                     | 0.00061<br>0.016989<br>9 | 0.00016<br>0.005<br>7  | Absconditabacteriales_(SR1)_uncultured_candidate             | 0 | 0 | Tessaracoccus_metagenome                           | 0.00019<br>0.514<br>7  | 5.03<br>867<br>E-05 |
| Cryptobacterium_sp.                                   | 0.00076<br>0.816<br>7        | 0.00019<br>0.834<br>7       | ASV_1208                                      | 0.00065<br>0.017579<br>9 | 0.00017<br>0.059<br>3  | Kryptoniales_MSB-3C8_sp.                       | 0.00050<br>0.01300<br>7  | 0.00012<br>0.987<br>6  | ASV_15570                                            | 0.00060<br>0.015189<br>2 | 0.00015<br>0.0540<br>8 | Absconditabacteriales_(SR1)_uncultured_Epsilonproteobacteria | 0 | 0 | Microgenomatia_uncultured_soil                     | 0.00018<br>0.810<br>8  | 4.85<br>693<br>E-05 |
| Dysgonomonas_sp.                                      | 0.00076<br>0.816<br>7        | 0.00019<br>0.834<br>7       | Actinomycetospora_sp.                         | 0.00064<br>0.01761<br>3  | 0.00016<br>0.075<br>4  | Chloroplast_Melosira_varians                   | 0.00050<br>0.0227<br>4   | 6.29<br>0.098<br>E-05  | ASV_15576                                            | 0.00060<br>0.015189<br>2 | 0.00015<br>0.0540<br>8 | Absconditabacteriales_(SR1)_uncultured_organism              | 0 | 0 | Flexibacter_sp.                                    | 0.00018<br>0.472<br>3  | 3.99<br>662<br>E-05 |
| Alkanindiges_uncultured_bacterium                     | 0.00075<br>0.542<br>3        | 0.00019<br>0.504<br>9       | Thermoleophilia_uncultured_Gaiella_sp.        | 0.00064<br>0.01901<br>3  | 0.00016<br>0.075<br>4  | ASV_4353                                       | 0.00048<br>0.012753<br>5 | 0.00012<br>0.588<br>6  | LD29_uncultured_Ve rucomicrobia                      | 0.00060<br>0.015189<br>2 | 0.00015<br>0.0540<br>8 | Absconditabacteriales_(SR1)_uncultured_prokaryote            | 0 | 0 | Paludibaculum_fermentans                           | 0.00017<br>0.888<br>5  | 4.61<br>879<br>E-05 |
| ASV_1901                                              | 0.00075<br>0.542<br>3        | 0.00019<br>0.504<br>9       | ASV_2249                                      | 0.00064<br>0.0168<br>4   | 0.00016<br>0.068<br>2  | Parvimonas_sp.                                 | 0.00048<br>0.01099<br>5  | 7.48<br>0.05<br>6      | Runella_metagenome                                   | 0.00060<br>0.015189<br>2 | 0.00015<br>0.0540<br>8 | ABY1_sp.                                                     | 0 | 0 | ASV_3026                                           | 0.00017<br>0.846<br>8  | 4.60<br>802<br>E-05 |
| ASV_15004                                             | 0.00075<br>0.039<br>9        | 0.00019<br>0.375<br>2       | Methylophilaceae_uncultured_sp.               | 0.00064<br>0.0168<br>4   | 0.00016<br>0.068<br>2  | Prevotella_denticola                           | 0.00048<br>0.0143<br>3   | 0.00012<br>0.397<br>2  | Planctomicrobium_uncultured_bacterium                | 0.00059<br>0.015059<br>9 | 0.00015<br>0.0487<br>3 | Acanthopleuribacter_uncultured_bacterium                     | 0 | 0 | Virgibacillus_sp.                                  | 0.00017<br>0.846<br>8  | 4.60<br>802<br>E-05 |
| Sphingobacteriaceae_uncultured_bacterium              | 0.00075<br>0.039<br>9        | 0.00019<br>0.375<br>2       | FCPU426_metagenome                            | 0.00064<br>0.030<br>3    | 0.00016<br>0.052<br>7  | Lactobacillus_malefermentans                   | 0.00047<br>0.0431<br>7   | 0.00012<br>0.246<br>8  | ASV_4770                                             | 0.00059<br>0.015732<br>7 | 0.00015<br>0.0422<br>9 | Acetitomaculum_uncultured_bacterium                          | 0 | 0 | Clostridium_islandicum                             | 0.00017<br>0.203<br>2  | 4.44<br>185<br>E-05 |
| Oligoflexia_uncultured_proteobacterium                | 0.00074<br>0.416<br>6        | 0.00019<br>0.214<br>3       | Candidatus_Moranbacteria_uncultured_bacterium | 0.00062<br>0.01787<br>8  | 0.00016<br>0.021<br>7  | Peptococcus_sp.                                | 0.00047<br>0.063287<br>5 | 6.21<br>0.053<br>E-05  | Alphaproteobacteria_uncultured_gut_metagenome        | 0.00058<br>0.015411<br>2 | 0.00015<br>0.081<br>7  | Acetitomaculum_uncultured_rumen                              | 0 | 0 | Nannocystis_unidentified                           | 0.00017<br>0.203<br>2  | 4.44<br>185<br>E-05 |
| Robbsia_andropogonis                                  | 0.00073<br>0.800<br>7        | 0.00019<br>0.055<br>3       | Comamonadaceae_uncultured_sp.                 | 0.00062<br>0.01787<br>8  | 0.00016<br>0.021<br>7  | Bacillus_thermoamyovorans                      | 0.00047<br>0.0218<br>8   | 0.00012<br>0.091<br>8  | ASV_17109                                            | 0.00058<br>0.015411<br>2 | 0.00015<br>0.081<br>7  | Acetitomaculum_sp.                                           | 0 | 0 | Candidatus_Xiphinematobacter_sp.                   | 0.00017<br>0.192<br>2  | 4.43<br>914<br>E-05 |
| Fusibacter_uncultured_bacterium                       | 0.00072<br>0.053<br>5        | 0.00018<br>0.604<br>1       | Kazania_uncultured_bacterium                  | 0.00062<br>0.01787<br>8  | 0.00016<br>0.021<br>7  | ASV_15470                                      | 0.00046<br>0.01785<br>2  | 0.00012<br>0.079<br>9  | Bacteroidetes_BD2-2_uncultured_sediment              | 0.00058<br>0.015411<br>2 | 0.00015<br>0.081<br>7  | Acetivibrio_uncultured_bacterium                             | 0 | 0 | Micavibrionaceae_uncultured_bacterium              | 0.00017<br>0.192<br>2  | 4.43<br>914<br>E-05 |
| Ruminococcus_torques_group_sp.                        | 0.00072<br>0.053<br>5        | 0.00018<br>0.604<br>1       | Planococcaceae_sp.                            | 0.00062<br>0.01787<br>8  | 0.00016<br>0.021<br>7  | bacterium_endosymbiont                         | 0.00046<br>0.01785<br>2  | 0.00012<br>0.079<br>9  | Gammaaproteobacteria_CHAB-XI-29_uncultured_bacterium | 0.00058<br>0.015411<br>2 | 0.00015<br>0.081<br>7  | Acetanaerobium_uncultured_bacterium                          | 0 | 0 | Qipengyuania_sp.                                   | 0.00017<br>0.192<br>2  | 4.43<br>914<br>E-05 |
| Spongibacteriaceae_BD1-7_cladeuncultured_Halialia     | 0.00072<br>0.053<br>5        | 0.00018<br>0.604<br>1       | Actinomycetaceae_F0332undidentified           | 0.00062<br>0.0582<br>1   | 0.00013<br>0.491<br>7  | Sediminibacterium_ginsengisoli                 | 0.00046<br>0.01785<br>2  | 0.00012<br>0.079<br>9  | Marvinbryantia_uncultured_bacterium                  | 0.00058<br>0.015411<br>2 | 0.00015<br>0.081<br>7  | Acetobacter_sp.                                              | 0 | 0 | Variovorax_sp.                                     | 0.00017<br>0.192<br>2  | 4.43<br>914<br>E-05 |
| Sporichthyaceae_hgcl_clade_uncultured_actinobacterium | 0.00072<br>0.053<br>5        | 0.00018<br>0.604<br>1       | Chthonobacter_uncultured_bacterium            | 0.00062<br>0.0543<br>4   | 0.00016<br>0.148<br>6  | Sutterella_sp.                                 | 0.00046<br>0.01785<br>2  | 0.00012<br>0.079<br>9  | Methylophilus_sp.                                    | 0.00058<br>0.015411<br>2 | 0.00015<br>0.081<br>7  | Acetobacteraceae_sp.                                         | 0 | 0 | Lachnospiraceae_uncultured_Lachnospiraceae         | 0.00017<br>0.100<br>7  | 4.41<br>538<br>E-05 |
| ASV_7762                                              | 0.00071<br>0.945<br>1        | 0.00018<br>0.576<br>1       | Collinsella_aerofaciens                       | 0.00062<br>0.0543<br>4   | 0.00016<br>0.148<br>6  | Frankiales_uncultured_bacterium                | 0.00046<br>0.01781<br>4  | 0.00012<br>0.078<br>9  | Propionibacteriaceae_uncultured_Propionibacteriaceae | 0.00058<br>0.015411<br>2 | 0.00015<br>0.081<br>7  | Acetobacteraceae_uncultured_bacterium                        | 0 | 0 | Rhodothermaceae_uncultured_Rhodothermaceae         | 0.00016<br>0.262<br>3  | 4.19<br>891<br>E-05 |
| Finogoldia_uncultured_bacterium                       | 0.00071<br>0.301<br>2        | 0.00018<br>0.409<br>9       | Woesearchaeales_AR15_metagenome               | 0.00062<br>0.0543<br>4   | 0.00016<br>0.148<br>6  | Nitrosarchaeum_sp.                             | 0.00046<br>0.01781<br>4  | 0.00012<br>0.078<br>9  | Saccharimonadales_WWH38uncultured_Candidatus         | 0.00058<br>0.015411<br>2 | 0.00015<br>0.081<br>7  | Acetobacteraceae_uncultured_metagenome                       | 0 | 0 | Kocuria_marina                                     | 0.00016<br>0.135<br>5  | 4.16<br>604<br>E-05 |
| Candidatus_Endoecteinascidia_sp.                      | 0.00069<br>0.360<br>2        | 0.00017<br>0.908<br>7       | Papillibacteruncultured_Clostridiaceae        | 0.00060<br>0.0442<br>9   | 0.00015<br>0.066<br>3  | Oscillospiraceae_sp.                           | 0.00046<br>0.01781<br>4  | 0.00012<br>0.078<br>9  | Acremonium_fuici                                     | 0.00056<br>0.014247<br>5 | 0.00015<br>0.0523<br>9 | Acetobacteraceae_uncultured_sp.                              | 0 | 0 | Paenibacillus_phoenicis                            | 0.00015<br>0.974<br>4  | 4.12<br>457<br>E-05 |
| Lachnospiraceae_NK3A20_group_uncultured_Firmicutes    | 0.00069<br>0.101<br>2        | 0.00017<br>0.841<br>9       | ASV_18343                                     | 0.00059<br>0.0995<br>2   | 0.00015<br>0.490<br>7  | ASV_12478                                      | 0.00046<br>0.0707<br>1   | 0.00012<br>0.059<br>7  | ASV_2910                                             | 0.00056<br>0.014247<br>5 | 0.00015<br>0.0523<br>9 | Acetobacteraceae_uncultured_alpha_proteobacterium            | 0 | 0 | ASV_1161                                           | 0.00015<br>0.973<br>1  | 3.55<br>677<br>E-05 |
| ASV_15543                                             | 0.00068<br>0.546<br>8        | 0.00017<br>0.698<br>7       | Bifid19_uncultured_p_rorakaryote              | 0.00059<br>0.0295<br>2   | 0.00015<br>0.490<br>7  | Roseburia_gut_metagenome                       | 0.00046<br>0.0707<br>1   | 0.00012<br>0.059<br>7  | Mitochondria_Eukaryota_sp.                           | 0.00056<br>0.014247<br>5 | 0.00015<br>0.0523<br>9 | Acetobacterium_sp.                                           | 0 | 0 | Flavobacterium_parense                             | 0.00015<br>0.615<br>9  | 4.03<br>201<br>E-05 |
| ASV_15546                                             | 0.00068<br>0.546<br>8        | 0.00017<br>0.698<br>7       | Candidatus_Planktophila_sp.                   | 0.00059<br>0.0295<br>2   | 0.00015<br>0.490<br>7  | Acinetobacter_metagenome                       | 0.00046<br>0.0360<br>7   | 0.00012<br>0.070<br>3  | Gammaaproteobacteria_211ds20_uncultured_bacterium    | 0.00055<br>0.014999<br>4 | 0.00015<br>0.0523<br>9 | Acetothermia_uncultured_bacterium                            | 0 | 0 | Xanthobacteraceae_Xanthobacter_sp.                 | 0.00015<br>0.615<br>9  | 4.03<br>201<br>E-05 |
| ASV_5386                                              | 0.00068<br>0.546<br>8        | 0.00017<br>0.698<br>7       | Clavibacter_sp.                               | 0.00059<br>0.0295<br>2   | 0.00015<br>0.490<br>7  | Moraxella_atlantae                             | 0.00046<br>0.0360<br>7   | 0.00012<br>0.070<br>3  | Methylobacterium_aehaevivum                          | 0.00055<br>0.014999<br>4 | 0.00015<br>0.0523<br>9 | Acholeplasma_uncultured_bacterium                            | 0 | 0 | Anaeromyxobacter_uncultured_bacterium              | 0.00015<br>0.427<br>3  | 3.98<br>331<br>E-05 |
| Chlamydiaceae_uncultured_Chlamydiales                 | 0.00068<br>0.546<br>8        | 0.00017<br>0.698<br>7       | Clostridium_perfringens                       | 0.00059<br>0.0295<br>2   | 0.00015<br>0.490<br>7  | Phreatobacter_uncultured_Alphaproteobacteria   | 0.00046<br>0.0360<br>7   | 0.00012<br>0.070<br>3  | Prevotella_oeschei                                   | 0.00055<br>0.012871<br>6 | 0.00015<br>0.0473<br>6 | Acholeplasma_axanthum                                        | 0 | 0 | ASV_2433                                           | 0.00015<br>0.427<br>3  | 3.98<br>331<br>E-05 |
| Gastranaerophilales_uncultured_Merismopedea           | 0.00068<br>0.546<br>8        | 0.00017<br>0.698<br>7       | Puia_uncultured_soil                          | 0.00059<br>0.0295<br>2   | 0.00015<br>0.490<br>7  | Sericytochromatium_uncultured_soil             | 0.00046<br>0.0360<br>7   | 0.00012<br>0.070<br>3  | Eggerthella_uncultured_bacterium                     | 0.00055<br>0.014480<br>7 | 0.00015<br>0.0325<br>1 | Acholeplasma_brassicae                                       | 0 | 0 | Berkelbacteria_candidate_division                  | 0.00015<br>0.427<br>3  | 3.98<br>331<br>E-05 |
| Hymenobacter_uncultured_bacterium                     | 0.00068<br>0.546<br>8        | 0.00017<br>0.698<br>7       | Sandaracinus_metagenome                       | 0.00059<br>0.0295<br>2   | 0.00015<br>0.490<br>7  | ASV_2390                                       | 0.00045<br>0.0547<br>5   | 0.00010<br>0.057<br>5  | Olsenella_umbonata                                   | 0.00054<br>0.0120<br>9   | 0.00015<br>0.013<br>9  | Acholeplasma_laidlawii                                       | 0 | 0 | Candidatus_Woesebacteria                           | 0.00015<br>0.427<br>3  | 3.98<br>331<br>E-05 |
| Thermoplasmata_Marine_Group_II_uncultured_archaeon    | 0.00068<br>0.533<br>4        | 0.00017<br>0.695<br>2       | ASV_2386                                      | 0.00058<br>0.0870<br>4   | 0.00013<br>0.397<br>9  | ASV_2465                                       | 0.00043<br>0.0441<br>5   | 0.00011<br>0.216<br>5  | Paracaedibacteraceae_uncultured_Alphaproteobacteria  | 0.00054<br>0.0120<br>9   | 0.00015<br>0.013<br>9  | Acholeplasma_morum                                           | 0 | 0 | Cytophaga_uncultured_sphingobacteria               | 0.00015<br>0.427<br>3  | 3.98<br>331<br>E-05 |
| ASV_8117                                              | 0.00068<br>0.347<br>8        | 0.00017<br>0.647<br>3       | ASV_2180                                      | 0.00058<br>0.0635<br>4   | 0.00015<br>0.139<br>6  | ASV_8102                                       | 0.00043<br>0.0441<br>5   | 0.00011<br>0.216<br>5  | Shinella_sp.                                         | 0.00054<br>0.0120<br>9   | 0.00015<br>0.013<br>9  | Acholeplasma_sp.                                             | 0 | 0 | Dadabacteriales_uncultured_bacterium               | 0.00015<br>0.427<br>3  | 3.98<br>331<br>E-05 |

|                                                         |             |             |                                                                  |            |             |                                                 |             |             |                                                     |             |             |                                                    |   |   |                                                    |             |             |
|---------------------------------------------------------|-------------|-------------|------------------------------------------------------------------|------------|-------------|-------------------------------------------------|-------------|-------------|-----------------------------------------------------|-------------|-------------|----------------------------------------------------|---|---|----------------------------------------------------|-------------|-------------|
| Rhodobacteraceae_Yoonia-LokanellaLokanella_fryxellensis | 0.000683478 | 0.000176473 | Leptotrichia_hofstadii                                           | 0.0005849  | 0.000151173 | Prevotella_baroniae                             | 0.00043415  | 0.000112165 | ASV_4563                                            | 0.000523165 | 0.000135081 | Acholeplasmataceae_EMP-G18_uncultured_Mollicutes   | 0 | 0 | Mitochondrioididentified_proteobacterium           | 0.000154273 | 3.98331E-05 |
| Prevotella_pallens                                      | 0.000665753 | 0.000171897 | Cutibacterium_sp.                                                | 0.00058412 | 0.000150817 | ASV_5779                                        | 0.000433035 | 6.74E-05    | Micropruina_sp.                                     | 0.000523165 | 0.000135081 | Acholeplasmauncultured_Acholeplasmataceae          | 0 | 0 | Paludibacteraceae_uncultured_soil                  | 0.000154273 | 3.98331E-05 |
| Leptotrichia_shahii                                     | 0.000665138 | 0.000118124 | Eggerthellaceae_uncultured_metagenome                            | 0.00058411 | 0.000150817 | Anaerococcusuncultured_organism                 | 0.000430715 | 8.19E-05    | Rhizobiales_Incertae_Sedis_uncultured_p_rorakaryote | 0.000523165 | 0.000135081 | Achromatium_sp.                                    | 0 | 0 | Saprospiraceae_uncultured_Saprospiraceae           | 0.000154273 | 3.98331E-05 |
| Deefgea_uncultured_bacterium                            | 0.00065699  | 0.000169533 | RS25G_metagenome                                                 | 0.00058411 | 0.000150817 | Lachnospiraceae_uncultured_human_gut            | 0.00042461  | 0.000109634 | Johnsonella_ignava                                  | 0.00051725  | 9.23E-05    | Acidaminobacter_uncultured_bacterium               | 0 | 0 | Prevotellaceae_UCG-001_uncultured_rumen            | 0.000147456 | 3.8073E-05  |
| Shinella_sp.                                            | 0.00065359  | 0.000168758 | Christensenellaceae_R-7_group_uncultured_bacterium               | 0.00058334 | 0.00015061  | Micrococcaceae_Yaniella_uncultured_bacterium    | 0.00042103  | 0.00010871  | Candidatus_Magasanikbacteria_magasanome             | 0.00051658  | 0.00013338  | Acidaminococcaceae_uncultured_bacterium            | 0 | 0 | Phormidiaceae_uncultured_bacterium                 | 0.00014648  | 3.7822E-05  |
| Kocuria_marina                                          | 0.000644789 | 0.00013323  | Opitulus_metagenome                                              | 0.00058334 | 0.00015061  | Eubacterium_minutum                             | 0.00041851  | 0.00010806  | Methylobacillus_sp.                                 | 0.00051658  | 0.00013338  | Acidibacter_metagenome                             | 0 | 0 | Planctomycetes_Pl4_lineageuncultured_p_rorakaryote | 0.00014636  | 3.7790E-05  |
| Candidatus_Melainabacteria                              | 0.000643432 | 0.000161633 | Sporichthya_metagenome                                           | 0.00058334 | 0.00015061  | Prolixibacteraceae_uncultured_sp.               | 0.00041346  | 0.000105    | Alistipes_uncultured_Alistipes                      | 0.000517    | 0.000133207 | Acidibacter_uncultured_bacterium                   | 0 | 0 | ASV_1837                                           | 0.00014412  | 3.4472E-05  |
| Gemmataceae_uncultured_bacterium_enrichment             | 0.000643432 | 0.000161633 | ASV_2160                                                         | 0.00057971 | 0.000150184 | Carnobacterium_sp.                              | 0.00041252  | 0.00010614  | ASV_16736                                           | 0.00051590  | 0.000133207 | Acidibacter_sp.                                    | 0 | 0 | Pyrimonadaceae_RB41_sp.                            | 0.00014412  | 2.5743E-05  |
| Candidatus_Nitrosocosmicsus_sp.                         | 0.000634652 | 0.000163866 | Sporichthyaceae_hgcl_clade_uncultured_Actinomycetales            | 0.00055612 | 0.000150359 | Sphingobacterium_rhinocerotis                   | 0.00041252  | 0.00010614  | ASV_2862                                            | 0.00051590  | 0.000133207 | Acidimicrobia_IMCC26_256_metagenome                | 0 | 0 | Acholeplasma_brassicae                             | 0.00014412  | 3.5803E-05  |
| ASV_16643                                               | 0.000617602 | 0.000159462 | ASV_15198                                                        | 0.00055594 | 0.000150354 | Z4M62_Z4M62_uncultured_bacterium                | 0.00041252  | 0.00010614  | Berkelbacteria_uncultured_soil                      | 0.00051590  | 0.000133207 | Acidimicrobia_IMCC26_256_sp.                       | 0 | 0 | Paenibacillus_glucanolyticus                       | 0.00014412  | 3.5803E-05  |
| Chthoniobacter_uncultured_bacterium                     | 0.000617602 | 0.000159462 | Methylobacterium-Methylobacterium_uncultured_Alphaproteobacteria | 0.00055594 | 0.000150354 | ASV_1208                                        | 0.00041252  | 0.00010614  | Patescibacteria_WWW_E5uncultured_aerobic            | 0.00051590  | 0.000133207 | Acidimicrobia_IMCC26_256_uncultured_bacterium      | 0 | 0 | Latescibacterota_uncultured_Bacteroidetes          | 0.00014412  | 3.5515E-05  |
| Deinococcus_xinjiangensis                               | 0.000617602 | 0.000159462 | Megasphaera_unidentified                                         | 0.00055549 | 0.000150342 | Desulforhabdusunidentified_sulfate-reducing     | 0.00041252  | 0.00010614  | Porticoccus_metagenome                              | 0.00051590  | 0.000133207 | Acidimicrobia_IMCC26_256_uncultured_soil           | 0 | 0 | Obscuribacteraceaeuncultured_Gloeobacter           | 0.00014412  | 3.5323E-05  |
| Lacunisphaera_uncultured_bacterium                      | 0.000617602 | 0.000159462 | ASV_5304                                                         | 0.00055549 | 0.000150342 | Johnsonella_Firmicutes_oral                     | 0.00041252  | 9.79E-05    | Denitratissoma_sp.                                  | 0.00049619  | 0.00010732  | Acidimicrobia_IMCC26_256uncultured_Acidithermonas  | 0 | 0 | ASV_12573                                          | 0.00014412  | 3.4670E-05  |
| Spirochaeta_sp.                                         | 0.000617602 | 0.000159462 | ASV_7984                                                         | 0.00055549 | 0.000150342 | ASV_3021                                        | 0.00041252  | 8.69E-05    | Bdellovibrio_exovorus                               | 0.00048676  | 0.00012581  | Acidimicrobia_IMCC26_256uncultured_actinobacterium | 0 | 0 | Paracaedibacteraceae_uncultured_prokaryote         | 0.00014412  | 3.4670E-05  |
| Hungateiclostridiaceae_uncultured_sp.                   | 0.000614534 | 0.000158672 | BSV13_sp.                                                        | 0.00055549 | 0.000150342 | Sphingomonas_panaciterrae                       | 0.00041252  | 8.80E-05    | Blnr141_metagenome                                  | 0.00048676  | 0.00012581  | Acidimicrobia_IMCC26_256uncultured_Actinomycetales | 0 | 0 | Nitrosomonadaceae_GOUTA6_metagenome                | 0.00014412  | 3.4560E-05  |
| Bacteroidales_UCG-001_uncultured_prokaryote             | 0.00059417  | 0.000153418 | Clostridia_uncultured_bacteria                                   | 0.00055549 | 0.000150342 | Aerosphaera_sp.                                 | 0.00041252  | 0.00010614  | Chlamydiaeae_uncultured_organism                    | 0.00048676  | 0.00012581  | Acidimicrobia_sp.                                  | 0 | 0 | Aliidongia_dinghuensis                             | 0.00014412  | 3.3591E-05  |
| Rhodoluna_uncultured_bacterium                          | 0.00059417  | 0.000153418 | Luteibacter_yejuensis                                            | 0.00055549 | 0.000150342 | Arachis_hypogaea                                | 0.00041252  | 0.00010614  | Phycisphaeraeae_SM1A02unidentified_marine           | 0.00048676  | 0.00012581  | Acidimicrobia_uncultured_bacterium                 | 0 | 0 | Candidatus_Pereginiibacteriametagenome             | 0.00014412  | 3.3591E-05  |
| Cellulomonadaceae_sp.                                   | 0.00059234  | 0.000152942 | Sericytochromatium_sp.                                           | 0.00055549 | 0.000150342 | ASV_9492                                        | 0.00041252  | 0.00010614  | Pirellulaceae_uncultured_sludge                     | 0.00048676  | 0.00012581  | Acidimicrobia_uncultured_metagenome                | 0 | 0 | Defluvitellaceae_UCG-011_sp.                       | 0.00014412  | 3.3591E-05  |
| ASV_16713                                               | 0.000587544 | 0.000151730 | Candidatus_Moranbacteria_uncultured_Parcubacteria                | 0.00055549 | 0.000150342 | Corynebacterium_matriuchotii                    | 0.00041252  | 0.00010614  | Rubinisphaeraeae_uncultured_bacterium               | 0.00048676  | 0.00012581  | Acidimicrobia_uncultured_sp.                       | 0 | 0 | Gailella_metagenome                                | 0.00014412  | 3.3591E-05  |
| Caedibacter_sp.                                         | 0.000587544 | 0.000151730 | Chloroflexia_JG30-KF-CM67_metagenome                             | 0.00055549 | 0.000150342 | SphingorhabdusSphingomonas_sp.                  | 0.00041252  | 0.00010614  | uncultured_Thermovenanubulum                        | 0.00048676  | 0.00012581  | Acidimicrobia_uncultured_Acidimicrobia             | 0 | 0 | Rs-M47_sp.                                         | 0.00014412  | 3.3591E-05  |
| Georgenia_sp.                                           | 0.000587544 | 0.000151730 | Lawsonella_uncultured_bacterium                                  | 0.00055549 | 0.000150342 | ASV_5832                                        | 0.00041252  | 0.00010614  | ASV_16667                                           | 0.00048676  | 0.00012581  | Acidimicrobia_uncultured_actinobacterium           | 0 | 0 | ASV_15451                                          | 0.00014412  | 3.3494E-05  |
| Pyronema_omphalodes                                     | 0.000587544 | 0.000151730 | ASV_19103                                                        | 0.00055549 | 0.000150342 | Chloroflexia_Gitt-GS-136_uncultured_bacterium   | 0.00041252  | 0.00010614  | Bacteroides_plebeius                                | 0.00048676  | 0.00012581  | Acidimicrobia_uncultured_Actinomycetales           | 0 | 0 | Pirellulauncultured_Pasteuria                      | 0.00014412  | 3.2548E-05  |
| Latescibacterota_metagenome                             | 0.00058742  | 0.000151674 | Parcubacteria_UBA983Candidatus_Nomurabacteria                    | 0.00055549 | 0.000150342 | Chloroplast_Mallomonas_splendens                | 0.00041252  | 0.00010614  | Flavobacterium_lindanitolans                        | 0.00048676  | 0.00012581  | Acidimicrobia_uncultured_bacterium_YC-ZSS-LKJ199   | 0 | 0 | ASV_3021                                           | 0.00014412  | 3.1781E-05  |
| Breznakia_uncultured_bacterium                          | 0.00058470  | 0.000150962 | Sporichthya_sp.                                                  | 0.00055549 | 0.000150342 | Acetothermia_uncultured_bacterium               | 0.00041252  | 9.86E-05    | Longivirga_uncultured_bacterium                     | 0.00048676  | 0.00012581  | Acidiphilium_uncultured_bacterium                  | 0 | 0 | Bacilli_RF39_human_gut                             | 0.00014412  | 3.1781E-05  |
| Megamonasuncultured_organism                            | 0.00058470  | 0.000150962 | ASV_15233                                                        | 0.00055549 | 0.000150342 | Lentimicrobiaceae_uncultured_Sphingobacteriales | 0.00041252  | 9.86E-05    | Parvimonas_Peptostreptococcaceae_bacterium          | 0.00048676  | 0.00012581  | Acidiphilium_sp.                                   | 0 | 0 | Hydrogenophilus_sp.                                | 0.00014412  | 3.1781E-05  |
| Roseomonas_giardii                                      | 0.00058470  | 0.000150962 | Johnsonella_Firmicutes_oral                                      | 0.00055549 | 0.000150342 | Verticillium_sp.                                | 0.00041252  | 9.86E-05    | Klenkia_sp.                                         | 0.00048676  | 0.00012581  | Acidisoma_sp.                                      | 0 | 0 | Obscuribacteraceae_uncultured_bacterium            | 0.00014412  | 3.1781E-05  |
| Mucilagibacter_calamcampi                               | 0.00058470  | 0.000150962 | Methylophilaceae_uncultured_bacterium                            | 0.00055549 | 0.000150342 | Tsakamurellia_paurometabola                     | 0.00041252  | 7.12E-05    | Holophagaceae_metagenome                            | 0.00048676  | 0.00012581  | Acidithiobacillaceae_KC-M-B-112_sp.                | 0 | 0 | Pararhizobium_herbariae                            | 0.00014412  | 3.1781E-05  |
| Caulobacter_metagenome                                  | 0.000579947 | 0.000176455 | Patulibacter_sp.                                                 | 0.00055549 | 0.000150342 | Fimbrimonas_metagenome                          | 0.00041252  | 9.82E-05    | Ruminococcus_gaurei_group_sp.                       | 0.00044799  | 0.00011567  | Acidithiobacillus_ferrooxidans                     | 0 | 0 | Parvimonas_sp.                                     | 0.00014412  | 3.1781E-05  |
| Sphingobacteriales_S15A-MN91_uncultured_bacterium       | 0.00057400  | 0.00018204  | Arcicella_uncultured_bacterium                                   | 0.00055549 | 0.000150342 | ASV_6442                                        | 0.00041252  | 9.75E-05    | Haliangium_uncultured_prokaryote                    | 0.00044371  | 0.00011198  | Acidobacteria_bacterium                            | 0 | 0 | Singulisphaerauncultured_Planctomycetales          | 0.00014412  | 3.1781E-05  |
| Anaerococcusuncultured_organism                         | 0.000568057 | 0.00010362  | Chloroflexia_JG30-KF-CM68_metagenome                             | 0.00055549 | 0.000150342 | uncultured_uncultured_metagenome                | 0.00041252  | 9.75E-05    | ASV_17967                                           | 0.00044371  | 0.00011198  | Acidobacteriaceae_(Subgroup_1)_sp.                 | 0 | 0 | Paludibaculumuncultured_Acidobacteria              | 0.00014412  | 3.1245E-05  |

|                                                                     |                    |                     |                                                                  |                    |                    |                                                             |                    |                     |                                                 |                    |                    |                                                                  |   |   |                                                                       |                     |                     |
|---------------------------------------------------------------------|--------------------|---------------------|------------------------------------------------------------------|--------------------|--------------------|-------------------------------------------------------------|--------------------|---------------------|-------------------------------------------------|--------------------|--------------------|------------------------------------------------------------------|---|---|-----------------------------------------------------------------------|---------------------|---------------------|
| Chryseobacterium_u<br>ncultured_Bacteroides                         | 0.00<br>056<br>784 | 0.00<br>014<br>661  | Flavobacterium_arse<br>natis                                     | 0.00<br>050<br>061 | 0.00<br>012<br>925 | Acidaminococcaceae_u<br>ncultured_bacterium                 | 0.00<br>037<br>502 | 9.68<br>305<br>E-05 | ASV_17973                                       | 0.00<br>011<br>100 | 0.00<br>011<br>100 | Acidobacteriae_Elev-<br>16S-1166_sp.                             | 0 | 0 | Pseudanabaena_PC<br>C-7429_sp.                                        | 0.00<br>012<br>101  | 3.12<br>454<br>E-05 |
| Afiopia_sp.                                                         | 0.00<br>056<br>279 | 0.00<br>014<br>531  | Glutamicobacter_sp.                                              | 0.00<br>050<br>061 | 0.00<br>012<br>925 | Actinoplanes_garbadin<br>ensis                              | 0.00<br>037<br>502 | 9.68<br>305<br>E-05 | ASV_17981                                       | 0.00<br>042<br>992 | 0.00<br>011<br>100 | Acidobacteriae_Elev-<br>16S-<br>1166_uncultured_bacteri<br>um    | 0 | 0 | Anaerococcusuncultu<br>red_organism                                   | 0.00<br>011<br>970  | 3.09<br>077<br>E-05 |
| Cellulosimicrobium_s<br>p.                                          | 0.00<br>056<br>279 | 0.00<br>014<br>531  | Peptococcaceae_unc<br>ultured_sp.                                | 0.00<br>050<br>061 | 0.00<br>012<br>925 | ASV_2084                                                    | 0.00<br>037<br>502 | 9.68<br>305<br>E-05 | Caldilineaceae_uncul<br>tured_metagenome        | 0.00<br>042<br>992 | 0.00<br>011<br>100 | Acidobacteriae_sp.                                               | 0 | 0 | ASV_16127                                                             | 0.00<br>011<br>970  | 3.09<br>077<br>E-05 |
| Gemmataceae_uncul<br>tured_metagenome                               | 0.00<br>056<br>279 | 0.00<br>014<br>531  | Alphapapillom_uncultu<br>red_Bacteroidetes                       | 0.00<br>048<br>644 | 0.00<br>012<br>560 | ASV_14534                                                   | 0.00<br>037<br>425 | 9.66<br>312<br>E-05 | Deefgea_sp.                                     | 0.00<br>042<br>992 | 0.00<br>011<br>100 | Acidocella_uncultured<br>bacterium                               | 0 | 0 | Giesbergeria_sp.                                                      | 0.00<br>011<br>970  | 3.09<br>077<br>E-05 |
| Hirschia_metagenom<br>e                                             | 0.00<br>056<br>279 | 0.00<br>014<br>531  | ASV_16302                                                        | 0.00<br>048<br>644 | 0.00<br>012<br>560 | Defluvitellaceae_UC<br>G-011_sp.                            | 0.00<br>037<br>425 | 9.66<br>312<br>E-05 | Desulfobutbus_sp.                               | 0.00<br>042<br>992 | 0.00<br>011<br>100 | Acidothermus_uncultu<br>red_bacterium                            | 0 | 0 | Methylomonadaceae_<br>pLW-20_sp.                                      | 0.00<br>011<br>970  | 3.09<br>077<br>E-05 |
| Longimicrobium_unc<br>ultured_bacterium                             | 0.00<br>056<br>279 | 0.00<br>014<br>531  | Paeniglutamicobacter<br>_sp.                                     | 0.00<br>048<br>644 | 0.00<br>012<br>560 | Gemmata_metagenom<br>e                                      | 0.00<br>037<br>425 | 9.66<br>312<br>E-05 | Kineosporiaceae_sp.                             | 0.00<br>042<br>992 | 0.00<br>011<br>100 | Acidothermus_sp.                                                 | 0 | 0 | Aliidimarina_uncultu<br>red_bacterium                                 | 0.00<br>011<br>923  | 2.93<br>383<br>E-05 |
| Sutterellaceae_uncult<br>ured_sp.                                   | 0.00<br>056<br>279 | 0.00<br>014<br>531  | ASV_19178                                                        | 0.00<br>048<br>053 | 0.00<br>012<br>407 | Mycoplasmataceae_u<br>ncultured_Firmicutes                  | 0.00<br>037<br>425 | 9.66<br>312<br>E-05 | Opitutus_metagenom<br>e                         | 0.00<br>042<br>992 | 0.00<br>011<br>100 | Acidovorax_sp.                                                   | 0 | 0 | Rhodothermaceae_sp                                                    | 0.00<br>011<br>937  | 2.92<br>345<br>E-05 |
| ASV_9885                                                            | 0.00<br>055<br>784 | 0.00<br>014<br>403  | Finogoldia_unculture<br>d_bacterium                              | 0.00<br>048<br>053 | 0.00<br>012<br>407 | Rhodopirellula_metag<br>enome                               | 0.00<br>037<br>425 | 9.66<br>312<br>E-05 | SB-<br>5_uncultured_Cytoph<br>agales            | 0.00<br>042<br>992 | 0.00<br>011<br>100 | Acinetobacter_metage<br>nome                                     | 0 | 0 | ASV_7974                                                              | 0.00<br>011<br>294  | 2.91<br>623<br>E-05 |
| ASV_9887                                                            | 0.00<br>055<br>784 | 0.00<br>014<br>403  | Methylparacoccus_m<br>etagenome                                  | 0.00<br>048<br>053 | 0.00<br>012<br>407 | Rickettsiales_SM2D12<br>uncultured_Phyllobact<br>eriaceae   | 0.00<br>037<br>425 | 9.66<br>312<br>E-05 | Aerospaera_uncultu<br>red_bacterium             | 0.00<br>042<br>931 | 0.00<br>011<br>100 | Acinetobacter_baumann<br>ii                                      | 0 | 0 | Bacteriovorax_uncult<br>ured_bacterium                                | 0.00<br>014<br>151  | 2.88<br>E-05        |
| Butyrivibrio_Eubacter<br>ium_sp.                                    | 0.00<br>055<br>078 | 9.72<br>477<br>E-05 | Microtrichales_metag<br>enome                                    | 0.00<br>048<br>053 | 0.00<br>012<br>407 | Afiopia_sp.                                                 | 0.00<br>036<br>582 | 9.44<br>551<br>E-05 | Rickettsiaceae_uncul<br>tured_bacterium         | 0.00<br>041<br>326 | 0.00<br>011<br>670 | Acinetobacter_kyonggi<br>ensis                                   | 0 | 0 | Methylacidiphilaceae_<br>uncultured_uncultu<br>red_Verrucomicrobiales | 0.00<br>011<br>154  | 2.88<br>E-05        |
| ASV_7249                                                            | 0.00<br>053<br>958 | 0.00<br>013<br>932  | Pseudohongiella_met<br>agenome                                   | 0.00<br>048<br>053 | 0.00<br>012<br>407 | Hylemonella_sp.                                             | 0.00<br>036<br>582 | 9.44<br>551<br>E-05 | Dysgonomonadacea<br>e_sp.                       | 0.00<br>041<br>066 | 0.00<br>011<br>603 | Acinetobacter_sp.                                                | 0 | 0 | oc32_sp.                                                              | 0.00<br>011<br>154  | 2.88<br>E-05        |
| Aridibacter_sp.                                                     | 0.00<br>053<br>619 | 0.00<br>013<br>844  | Sericytochromatium<br>metagenome                                 | 0.00<br>048<br>053 | 0.00<br>012<br>407 | ASV_11163                                                   | 0.00<br>036<br>271 | 9.36<br>521<br>E-05 | Anaerolineae_A4b__<br>uncultured_soil           | 0.00<br>040<br>690 | 0.00<br>011<br>506 | Acinetobacter_towneri                                            | 0 | 0 | Sterolibacterium_unc<br>ultured_bacterium                             | 0.00<br>011<br>154  | 2.88<br>E-05        |
| ASV_18963                                                           | 0.00<br>053<br>619 | 0.00<br>013<br>844  | Hymenobacter_ruber                                               | 0.00<br>048<br>023 | 0.00<br>012<br>399 | ASV_11164                                                   | 0.00<br>036<br>271 | 9.36<br>521<br>E-05 | Moheibacterunculture<br>d_compost               | 0.00<br>040<br>690 | 0.00<br>011<br>506 | Acremonium_fuci                                                  | 0 | 0 | Mesorhizobium_abizi<br>ae                                             | 0.00<br>011<br>059  | 2.85<br>547<br>E-05 |
| ASV_18967                                                           | 0.00<br>053<br>619 | 0.00<br>013<br>844  | ASV_19652                                                        | 0.00<br>047<br>996 | 0.00<br>012<br>392 | Bauldia_uncultured_b<br>acterium                            | 0.00<br>036<br>271 | 9.36<br>521<br>E-05 | ASV_17893                                       | 0.00<br>040<br>176 | 0.00<br>011<br>373 | Actinobacillus_sp.                                               | 0 | 0 | Rhodospirillaceae_un<br>cultured_metagenom<br>e                       | 0.00<br>011<br>059  | 2.85<br>547<br>E-05 |
| Peptococcus_sp.                                                     | 0.00<br>053<br>619 | 0.00<br>013<br>844  | ASV_2910                                                         | 0.00<br>047<br>996 | 0.00<br>012<br>392 | Bradymonadales_met<br>agenome                               | 0.00<br>035<br>089 | 9.05<br>994<br>E-05 | Chloroplast_Synedra<br>_hyperborea              | 0.00<br>040<br>176 | 0.00<br>011<br>373 | Actinobacteria_0319-<br>7L14_uncultured_actino<br>bacterium      | 0 | 0 | Verrucomicrobium_sp                                                   | 0.00<br>011<br>986  | 2.83<br>665<br>E-05 |
| Rhodobacter_sp.                                                     | 0.00<br>053<br>619 | 0.00<br>013<br>844  | Burkholderiales_TRA<br>3-20_sp.                                  | 0.00<br>047<br>996 | 0.00<br>012<br>392 | WS2_uncultured_soil                                         | 0.00<br>034<br>730 | 8.96<br>745<br>E-05 | Criblamydiaceae_sp.                             | 0.00<br>040<br>176 | 0.00<br>011<br>373 | Actinobacteria_PeM15_<br>bacterium_rJ7                           | 0 | 0 | Hydrotalea_uncultu<br>red_bacterium                                   | 0.00<br>011<br>487  | 2.70<br>794<br>E-05 |
| Prevotella_ammii                                                    | 0.00<br>053<br>154 | 0.00<br>013<br>724  | Caldilineaceae_sp.                                               | 0.00<br>047<br>996 | 0.00<br>012<br>392 | Coriobacteriales_Ince<br>rtae_Sedis_uncultured<br>_organism | 0.00<br>034<br>295 | 8.85<br>516<br>E-05 | Kocuria_sp.                                     | 0.00<br>040<br>176 | 0.00<br>011<br>373 | Actinobacteria_PeM15_<br>metagenome                              | 0 | 0 | Rhizobiales_Incertae<br>_Sedis_sp.                                    | 0.00<br>011<br>336  | 1.86<br>846<br>E-05 |
| Propionibacterium_sp                                                | 0.00<br>053<br>154 | 0.00<br>013<br>724  | Uliginosibacterium_f<br>lavum                                    | 0.00<br>047<br>996 | 0.00<br>012<br>392 | Prevotellainidentified                                      | 0.00<br>034<br>295 | 8.85<br>516<br>E-05 | Micromonosporaceae<br>_sp.                      | 0.00<br>040<br>176 | 0.00<br>011<br>373 | Actinobacteria_PeM15_<br>sp.                                     | 0 | 0 | ASV_5084                                                              | 0.00<br>011<br>284  | 2.65<br>555<br>E-05 |
| ASV_2910                                                            | 0.00<br>052<br>706 | 0.00<br>010<br>584  | Actinobacteria_uncult<br>ured_Actinomycetales<br>_bacterium      | 0.00<br>047<br>974 | 0.00<br>012<br>386 | Chitinophagaceae_un<br>cultured_Bacteroidete<br>s           | 0.00<br>033<br>968 | 8.77<br>071<br>E-05 | Sutterella_uncultured<br>_bacterium             | 0.00<br>040<br>176 | 0.00<br>011<br>373 | Actinobacteria_PeM15_<br>uncultured_soil                         | 0 | 0 | Candidatus_Falkowb<br>acteria_uncultured_b<br>acterium                | 0.00<br>011<br>284  | 2.65<br>555<br>E-05 |
| ASV_10460                                                           | 0.00<br>052<br>065 | 0.00<br>013<br>443  | Oxalobacter_uncultu<br>red_bacterium                             | 0.00<br>047<br>974 | 0.00<br>012<br>386 | Agitococcus_lubricus_<br>group_uncultured_ba<br>cterium     | 0.00<br>033<br>752 | 8.71<br>475<br>E-05 | Bacilli_RF39unidenti<br>fied                    | 0.00<br>039<br>988 | 0.00<br>011<br>324 | Actinobacteria_PeM15u<br>ncultured_actinobacteri<br>um           | 0 | 0 | Lactobacillus_delbrue<br>ckii                                         | 0.00<br>011<br>284  | 2.65<br>555<br>E-05 |
| Pedospheraeae_A<br>Durb.Bin063-<br>1_uncultured_Verruc<br>omicrobia | 0.00<br>052<br>065 | 0.00<br>013<br>443  | Fermentimonas_uncu<br>ltured_prokaryote                          | 0.00<br>047<br>056 | 0.00<br>012<br>15  | Denitratsomna_uncultu<br>red_bacterium                      | 0.00<br>033<br>752 | 8.71<br>475<br>E-05 | Desulfuropalus_met<br>agenome                   | 0.00<br>039<br>988 | 0.00<br>011<br>324 | Actinobacteria_sp.                                               | 0 | 0 | Neochlamydia_endos<br>ymbiont_of                                      | 0.00<br>011<br>284  | 2.65<br>555<br>E-05 |
| Chloroflexi_KD4-<br>96_sp.                                          | 0.00<br>052<br>020 | 0.00<br>013<br>431  | Clostridioides_difficile                                         | 0.00<br>045<br>430 | 0.00<br>011<br>730 | Chryseomicrobium_sp                                         | 0.00<br>033<br>481 | 8.64<br>481<br>E-05 | ASV_15920                                       | 0.00<br>038<br>940 | 0.00<br>011<br>054 | Actinobacteria_uncultu<br>red_bacterium                          | 0 | 0 | PelagibacteriumHyph<br>omicrobiaeae_bacteri<br>um                     | 0.00<br>011<br>284  | 2.65<br>555<br>E-05 |
| Collimonas_sp.                                                      | 0.00<br>052<br>020 | 0.00<br>013<br>431  | dgA-<br>11_gut_group_uncult<br>ured_bacterium                    | 0.00<br>045<br>430 | 0.00<br>011<br>730 | Adhaeribacter__metag<br>enome                               | 0.00<br>033<br>418 | 8.62<br>849<br>E-05 | ASV_19624                                       | 0.00<br>038<br>940 | 0.00<br>011<br>054 | Actinobacteria_uncultu<br>red_metagenome                         | 0 | 0 | Silvanigrellaceae_sp.                                                 | 0.00<br>011<br>284  | 2.65<br>555<br>E-05 |
| Clostridiaceae_sp.                                                  | 0.00<br>051<br>466 | 0.00<br>013<br>288  | Mycoplasma_sp.                                                   | 0.00<br>045<br>430 | 0.00<br>011<br>730 | Anaerovibrio_sp.                                            | 0.00<br>033<br>418 | 8.62<br>849<br>E-05 | ASV_9544                                        | 0.00<br>038<br>940 | 0.00<br>011<br>054 | Actinobacteria_uncultu<br>red_sp.                                | 0 | 0 | Aequorivita_sp.                                                       | 0.00<br>011<br>260  | 2.64<br>922<br>E-05 |
| Flavobacterium_anse<br>onense                                       | 0.00<br>051<br>466 | 0.00<br>013<br>288  | Patescibacteria_CPR<br>2_uncultured_Firmicu<br>tes               | 0.00<br>044<br>498 | 0.00<br>011<br>489 | ASV_17846                                                   | 0.00<br>033<br>418 | 8.62<br>849<br>E-05 | Chitinivorax_metag<br>enome                     | 0.00<br>038<br>940 | 0.00<br>011<br>054 | Actinobacteria_uncultu<br>red_Actinomycetales_ba<br>cterium      | 0 | 0 | Flavobacterium_kings<br>ejongi                                        | 0.00<br>011<br>260  | 2.64<br>922<br>E-05 |
| Paludibacteraceae_u<br>ncultured_Bacteroides                        | 0.00<br>051<br>466 | 0.00<br>013<br>288  | Cyanobacteria_sp.                                                | 0.00<br>044<br>439 | 0.00<br>011<br>474 | ASV_17854                                                   | 0.00<br>033<br>418 | 8.62<br>849<br>E-05 | Defluviococcus_uncul<br>tured_bacterium         | 0.00<br>038<br>940 | 0.00<br>011<br>054 | Actinobacteriota_MB-<br>A2-108_metagenome                        | 0 | 0 | ASV_2386                                                              | 0.00<br>011<br>144  | 2.30<br>305<br>E-05 |
| Jatrophihabitans_met<br>agenome                                     | 0.00<br>050<br>772 | 0.00<br>013<br>109  | Ilumatobacter_metag<br>enome                                     | 0.00<br>044<br>439 | 0.00<br>011<br>474 | ASV_8228                                                    | 0.00<br>033<br>418 | 8.62<br>849<br>E-05 | Devoziaceae_sp.                                 | 0.00<br>038<br>940 | 0.00<br>011<br>054 | Actinobacteriota_MB-<br>A2-108_sp.                               | 0 | 0 | Ethanolgenens_uncul<br>tured_bacterium                                | 0.93<br>043<br>E-05 | 2.53<br>821<br>E-05 |
| Candidatus_Nomura<br>bacteria_uncultured_<br>soil                   | 0.00<br>049<br>200 | 0.00<br>012<br>703  | Actinobacteriota_MB-<br>A2-<br>108uncultured_actino<br>bacterium | 0.00<br>043<br>958 | 0.00<br>011<br>35  | Babeliales_UBA12409<br>uncultured_Candidatu<br>s            | 0.00<br>033<br>418 | 8.62<br>849<br>E-05 | Lachnospiraceae_ND<br>3007_group_metag<br>enome | 0.00<br>038<br>940 | 0.00<br>011<br>054 | Actinobacteriota_MB-<br>A2-<br>108_uncultured_bacteri<br>um      | 0 | 0 | Gaella_actinobacteri<br>um_WWH12                                      | 0.93<br>043<br>E-05 | 2.53<br>821<br>E-05 |
| Chitinivibronaceae_p<br>ossible_genus_03_sp                         | 0.00<br>049<br>200 | 0.00<br>012<br>703  | Patescibacteria_CPR<br>2_sp.                                     | 0.00<br>043<br>958 | 0.00<br>011<br>35  | Competibacteraceae_<br>sp.                                  | 0.00<br>033<br>418 | 8.62<br>849<br>E-05 | Niveispirillum_sp.                              | 0.00<br>038<br>940 | 0.00<br>011<br>054 | Actinobacteriota_MB-<br>A2-<br>108uncultured_actinoba<br>cterium | 0 | 0 | ASV_3161                                                              | 0.92<br>439<br>E-05 | 2.53<br>665<br>E-05 |
| Oscillospiraceae_UC<br>G-<br>005_uncultured_bact<br>erium           | 0.00<br>049<br>200 | 0.00<br>012<br>703  | Armatimonadales_m<br>etagenome                                   | 0.00<br>043<br>750 | 0.00<br>011<br>296 | Roseimartima_sp.                                            | 0.00<br>033<br>418 | 8.62<br>849<br>E-05 | Promicromonosporac<br>eae_sp.                   | 0.00<br>038<br>940 | 0.00<br>011<br>054 | Actinomadura_sp.                                                 | 0 | 0 | Microsillaceae_uncul<br>tured_bacterium                               | 0.92<br>439<br>E-05 | 2.53<br>665<br>E-05 |
| Springomonas_glaci<br>alis                                          | 0.00<br>049        | 0.00<br>012         | ASV_20515                                                        | 0.00<br>043        | 0.00<br>011        | Hydrocarboniphaga_u<br>ncultured_bacterium                  | 0.00<br>033        | 8.60<br>693         | Pseudomonas_japoni<br>ca                        | 0.00<br>038        | 0.00<br>011        | Actinomycetes_uncultu<br>red_bacterium                           | 0 | 0 | Pectobacterium_sp.                                                    | 9.82<br>439         | 2.53<br>665         |



|                                                          | 2005        | 7035        |                                                  | 7509        | 2964        |                                                 | 3345        | E-05        |                                             | 9405        | 0545        |                                        |   |   |                                                       | E-05         | E-05        |
|----------------------------------------------------------|-------------|-------------|--------------------------------------------------|-------------|-------------|-------------------------------------------------|-------------|-------------|---------------------------------------------|-------------|-------------|----------------------------------------|---|---|-------------------------------------------------------|--------------|-------------|
| Alphaproteobacteria_uncultured_bacterium_enrichment      | 0.000486419 | 0.000126419 | Flavobacteriales_NS9_marine_group_sp.            | 0.000437509 | 0.000112964 | Deinococcus_reticulitemitis                     | 0.000332836 | 8.59379E-05 | Streptococcus_sobrius                       | 0.000380455 | 0.000100545 | Actinomyces_graevenitzii               | 0 | 0 | Planctomycetes_WD2101_soil_group_uncultured_bacterium | 9.82439E-05  | 2.53665E-05 |
| ASV_17928                                                | 0.000486419 | 0.000126419 | Muribaculaceae_sp.                               | 0.000437509 | 0.000112964 | ASV_18301                                       | 0.000332836 | 8.5502E-05  | Cloacimonadia_PBS-19_uncultured_bacterium   | 0.000380455 | 9.9814E-05  | Actinomyces_sp.                        | 0 | 0 | RCP2-54uncultured_prokaryote                          | 9.82439E-05  | 2.53665E-05 |
| Candidatus_Saccharibacteria                              | 0.000486419 | 0.000126419 | Pseudoflavitalea_uncultured_bacterium            | 0.000437509 | 0.000112964 | Pyrimonadaceae_RB41_sp.                         | 0.000332836 | 8.5502E-05  | Lactobacillus_agilis                        | 0.000380455 | 9.9814E-05  | Actinomyces_unidentified               | 0 | 0 | ASV_6298                                              | 9.76563E-05  | 2.52147E-05 |
| Eubacterium_coprostanoligenes_group_uncultured_bacterium | 0.000486419 | 0.000126419 | Reyranellaceae_uncultured_bacterium              | 0.000437509 | 0.000112964 | WS1_uncultured_bacterium                        | 0.000332836 | 8.5502E-05  | Vagococcus_sp.                              | 0.000380455 | 9.4302E-05  | Actinomycetaceae_uncultured_metagenome | 0 | 0 | BSV26_sp.                                             | 9.76563E-05  | 2.52147E-05 |
| Inhella_sp.                                              | 0.000486419 | 0.000126419 | ASV_6240                                         | 0.000437509 | 9.92E-05    | ASV_10613                                       | 0.000332836 | 8.4502E-05  | Nannocystis_sp.                             | 0.000380455 | 9.0003E-05  | Actinomycetaceae_uncultured_rumen      | 0 | 0 | Candidatus_Planktona_sp.                              | 9.76563E-05  | 2.52147E-05 |
| Lentimicrobiaceae_uncultured_Sphingobacteriales          | 0.000486419 | 0.000126419 | ASV_13359                                        | 0.000437509 | 0.000112964 | eub62A3_metagenome                              | 0.000332836 | 8.4502E-05  | ASV_2303                                    | 0.000380455 | 8.8804E-05  | Actinomycetaceae_uncultured_sp.        | 0 | 0 | ASV_7249                                              | 9.75737E-05  | 2.51934E-05 |
| Simplicispira_sp.                                        | 0.000486419 | 0.000126419 | Phreatobacter_uncultured_Brucella                | 0.000437509 | 0.000112964 | Lactobacillus_senioris                          | 0.000332836 | 8.4502E-05  | ASV_5802                                    | 0.000380455 | 8.8804E-05  | Actinomycetospora_sp.                  | 0 | 0 | Candidatus_Kaiserbacteriauncultured_organism          | 9.75737E-05  | 2.51934E-05 |
| Triticum_aestivum                                        | 0.000486419 | 0.000126419 | Psychrobacter_immobilis                          | 0.000437509 | 0.000112964 | Re-K70_terminate_group_uncultured_bacterium     | 0.000332836 | 8.4502E-05  | Blastocatellaceae_sp.                       | 0.000380455 | 8.8804E-05  | Actinoplanes_garbadinensis             | 0 | 0 | Z4MB62_Z4MB62uncultured_Bacteroidetes                 | 9.75737E-05  | 2.51934E-05 |
| Tropicomonas_sp.                                         | 0.000486419 | 0.000126419 | Clostridium_sensu_stricto_9_uncultured_bacterium | 0.000437509 | 0.000112964 | Rhodocyclaceae_uncultured_Georgfuchsia          | 0.000332836 | 8.2602E-05  | Candidatus_Omnitrophusuncultured_Firmicutes | 0.000380455 | 8.8804E-05  | Actinoplanes_sp.                       | 0 | 0 | ASV_11732                                             | 9.68101E-05  | 2.49963E-05 |
| ASV_14864                                                | 0.000475323 | 0.000126419 | Kazania_sp.                                      | 0.000418585 | 0.000108078 | ASV_6176                                        | 0.000314898 | 6.9242E-05  | Crocintomicaceae_sp.                        | 0.000342836 | 8.8804E-05  | Actinotalea_sp.                        | 0 | 0 | ASV_513                                               | 9.68101E-05  | 2.49963E-05 |
| Bacteroides_uncultured_Bacteroidaceae                    | 0.000475323 | 0.000126419 | Schlesneria_uncultured_bacterium                 | 0.000418585 | 0.000108078 | Bacteroidales_F082_uncultured_bacterium         | 0.000314898 | 8.1134E-05  | Hyphomonas_sp.                              | 0.000342836 | 8.8804E-05  | Actinotignum_sp.                       | 0 | 0 | Chlamydiaceae_metagenome                              | 0.009522E-05 | 2.45872E-05 |
| ASV_6446                                                 | 0.000469943 | 0.000126419 | JG30-KF-CM45_sp.                                 | 0.000418585 | 0.000108078 | ASV_7465                                        | 0.000301798 | 7.7922E-05  | LD1-PB3_metagenome                          | 0.000342836 | 8.8804E-05  | Adhaeribacter_metagenome               | 0 | 0 | Bacteroidia_uncultured_sp.                            | 8.92339E-05  | 2.30401E-05 |
| ASV_18506                                                | 0.000468999 | 0.000126419 | Hymenobacter_sp.                                 | 0.000418585 | 0.000108078 | ASV_4909                                        | 0.000299793 | 7.22949E-05 | Moraxellaceae_uncultured_gamma              | 0.000342836 | 8.8804E-05  | Adhaeribacter_uncultured_soil          | 0 | 0 | Candidatus_Giovannobacteria_uncultured_bacterium      | 8.92339E-05  | 2.30401E-05 |
| ASV_2889                                                 | 0.000468999 | 0.000126419 | Hyphomicrobium_sp.                               | 0.000418585 | 0.000108078 | Ruminococcus_gauvreaii_group_uncultured_rumen   | 0.000407223 | 7.67447E-05 | Neisseriaceae_uncultured_organism           | 0.000342836 | 8.8804E-05  | Adhaeribacter_sp.                      | 0 | 0 | Flavobacterium_uncultured_bacterium                   | 8.92339E-05  | 2.30401E-05 |
| ASV_6298                                                 | 0.000468999 | 0.000126419 | Lachnospiraceae_sp.                              | 0.000418585 | 0.000108078 | Corynebacterium_amycolatum                      | 0.000407223 | 6.88947E-05 | Parvimonas_sp.                              | 0.000342836 | 8.8804E-05  | Advenella_sp.                          | 0 | 0 | Hypnocyclus_uncultured_fusobacteriales                | 8.92339E-05  | 2.30401E-05 |
| Lactococcus_sp.                                          | 0.000468999 | 0.000126419 | Rufibacter_uncultured_bacterium                  | 0.000418585 | 0.000108078 | Kapabacterialesuncultured_Bacteroidetes/Clorobi | 0.000407223 | 5.93752E-05 | Planctomycetes_uncultured_bacterium         | 0.000342836 | 8.8804E-05  | Aenigmarchaeales_sp.                   | 0 | 0 | Parabacteroides_distasonis                            | 8.92339E-05  | 2.30401E-05 |
| Luteolibacter_uncultured_Verrucomicrobiales              | 0.000468999 | 0.000126419 | Sandaracinaceae_uncultured_metagenome            | 0.000418585 | 0.000108078 | ASV_14494                                       | 0.000407223 | 5.50066E-05 | Sterolibacterium_metagenome                 | 0.000342836 | 8.8804E-05  | Aenigmarchaeota_sp.                    | 0 | 0 | Planctomycetes_Pla3_lineage_uncultured_bacterium      | 8.92339E-05  | 2.30401E-05 |
| Roseburia_uncultured_rumen                               | 0.000468999 | 0.000126419 | Candidatus_Endonucleariobacter_sp.               | 0.000418585 | 0.000108078 | ASV_5871                                        | 0.000407223 | 5.82279E-05 | ASV_5322                                    | 0.000342836 | 8.8804E-05  | Aequorivita_sp.                        | 0 | 0 | Plantibacter_sp.                                      | 8.92339E-05  | 2.30401E-05 |
| Ammonibacillus_agariferforans                            | 0.000467643 | 0.000126419 | ASV_17550                                        | 0.000407643 | 0.000108054 | Pelagiococcusuncultured_Verrucomicrobia         | 0.000407643 | 7.25937E-05 | Cyanobium_PCC-6307_sp.                      | 0.000342836 | 8.67538E-05 | Aerococcaeae_sp.                       | 0 | 0 | Solitalea_sp.                                         | 8.92339E-05  | 2.30401E-05 |
| ASV_11030                                                | 0.000467643 | 0.000126419 | ASV_17552                                        | 0.000407643 | 0.000108054 | Hymenobacter_metagenome                         | 0.000407643 | 7.24736E-05 | Leeia_uncultured_bacterium                  | 0.000342836 | 8.67538E-05 | Aerococcaeae_uncultured_bacterium      | 0 | 0 | ASV_2465                                              | 8.78433E-05  | 1.95584E-05 |
| Blni41_uncultured_Sorangineae                            | 0.000465419 | 0.000126419 | Chloroplast_Chroomonas_coeulea                   | 0.000407643 | 0.000108054 | Pseudarobacter_uncultured_bacterium             | 0.000407643 | 7.24736E-05 | ASV_3560                                    | 0.000342836 | 6.4999E-05  | Aerococcus_sp.                         | 0 | 0 | Capnocytophaga_ochracea                               | 8.60162E-05  | 2.22093E-05 |
| Paenalcigenes_sp.                                        | 0.000465419 | 0.000126419 | Prevotellaceae_UCG-001_uncultured_bacterium      | 0.000407643 | 0.000108054 | Singulisphaera_sp.                              | 0.000407643 | 7.36068E-05 | Candidatus_Nitrosotenuis_sp.                | 0.000342836 | 8.53097E-05 | Aeromicrobium_sp.                      | 0 | 0 | Candidatus_Accumulibacter_sp.                         | 8.55037E-05  | 2.2077E-05  |
| Quadriflora_sp.                                          | 0.000465419 | 0.000126419 | Candidatus_Limnoluna_uncultured_bacterium        | 0.000407643 | 0.000108054 | Stenotrophomonas_rhizophila                     | 0.000407643 | 7.24736E-05 | Conexibacter_sp.                            | 0.000342836 | 8.53097E-05 | Aeromonas_metagenome                   | 0 | 0 | Chloroplast_Tetraselmis_cordiformis                   | 8.55037E-05  | 2.2077E-05  |
| Anaerococcus_sp.                                         | 0.000460999 | 0.000126419 | CL500-29_marine_group_bacterium_enrichment       | 0.000407643 | 9.93128E-05 | Oscillospirales_UCG-010gut_metagenome           | 0.000407643 | 7.08027E-05 | Antarctic_bacterium                         | 0.000342836 | 8.29867E-05 | Aeromonas_sp.                          | 0 | 0 | Leeia_sp.                                             | 8.55037E-05  | 2.2077E-05  |
| ASV_21429                                                | 0.000460999 | 0.000126419 | Rickettsiaceae_uncultured_sp.                    | 0.000407643 | 9.93128E-05 | Oxalobacteraceae_CM1G08_uncultured_bacterium    | 0.000407643 | 7.08027E-05 | ASV_6422                                    | 0.000342836 | 8.29867E-05 | Aeromonas_uncultured_gamma             | 0 | 0 | Sutterellaceae_uncultured_bacterium                   | 8.55037E-05  | 2.2077E-05  |
| Candidatus_Staskawiczbacteria_uncultured_soil            | 0.000460999 | 0.000126419 | Prevotella_nigrescens                            | 0.000407643 | 9.63428E-05 | Adhaeribacter_sp.                               | 0.000407643 | 6.90279E-05 | Candidatus_Uhrbacteria_uncultured_bacterium | 0.000342836 | 8.29867E-05 | Aerosphaera_uncultured_bacterium       | 0 | 0 | ASV_16447                                             | 8.54492E-05  | 2.20629E-05 |
| Lachnospirillum_sp.                                      | 0.000460999 | 0.000126419 | ASV_20445                                        | 0.000407643 | 9.30559E-05 | Brevinema_uncultured_bacterium                  | 0.000407643 | 6.90279E-05 | Flavobacterium_unidentified                 | 0.000342836 | 8.29867E-05 | Aerosphaera_sp.                        | 0 | 0 | ASV_15253                                             | 8.46453E-05  | 2.18553E-05 |
| Mitochondria_uncultured_bacterium                        | 0.000460999 | 0.000126419 | Bifid19_uncultured_delta                         | 0.000407643 | 9.30559E-05 | Candidatus_Ryanbacteria                         | 0.000407643 | 6.90279E-05 | Lacunisphaera_metagenome                    | 0.000342836 | 8.29867E-05 | Aestuvaricella_uncultured_bacterium    | 0 | 0 | Cyanobacteria_sp.                                     | 8.46453E-05  | 2.18553E-05 |
| Pirellulaceae_sp.                                        | 0.000460999 | 0.000126419 | Candidatus_Curtissbacteria_uncultured_bacterium  | 0.000407643 | 9.30559E-05 | Clostridia_UCG-014_uncultured_bacterium         | 0.000407643 | 6.90279E-05 | Polymorphobacter_sp.                        | 0.000342836 | 8.29867E-05 | Afipia_genosp.                         | 0 | 0 | Hyphomicrobiaceae_sp.                                 | 8.13114E-05  | 2.09945E-05 |
| Urubunella_sp.                                           | 0.000450362 | 0.000126419 | Clostridia_UCG-014_sp.                           | 0.000407643 | 9.30559E-05 | Flavobacterium_lindanitolerans                  | 0.000407643 | 6.90279E-05 | Spirochaeta_2_sp.                           | 0.000342836 | 8.29867E-05 | Afipia_sp.                             | 0 | 0 | ASV_13313                                             | 8.06751E-05  | 2.08302E-05 |

|                                                       |                         |                          |                                                     |                         |                         |                                                |                         |                         |                                                        |                         |                         |                                                 |   |   |                                                         |                         |                         |
|-------------------------------------------------------|-------------------------|--------------------------|-----------------------------------------------------|-------------------------|-------------------------|------------------------------------------------|-------------------------|-------------------------|--------------------------------------------------------|-------------------------|-------------------------|-------------------------------------------------|---|---|---------------------------------------------------------|-------------------------|-------------------------|
| Elizabethkingia_sp.                                   | 0.00<br>044<br>627<br>9 | 0.00<br>011<br>522<br>9  | Conexibacter_metagenome                             | 0.00<br>036<br>040<br>4 | 9.30<br>559<br>E-<br>05 | Hungateiclostridiaceae_uncultured_bacterium    | 0.00<br>026<br>734<br>4 | 6.90<br>279<br>E-<br>05 | Terriicrobium_sp.                                      | 0.00<br>032<br>141<br>4 | 8.29<br>887<br>E-<br>05 | Agathobacter_sp.                                | 0 | 0 | DEV007_uncultured_Verrucomicrobiales                    | 8.06<br>751<br>E-<br>05 | 2.08<br>302<br>E-<br>05 |
| Bifid19_sp.                                           | 0.00<br>043<br>544<br>5 | 0.00<br>011<br>243<br>1  | Oscillospiraceae_UCG-005_uncultured_Ruminococcaceae | 0.00<br>036<br>040<br>4 | 9.30<br>559<br>E-<br>05 | Hyphomonadaceae_SBW02_metagenome               | 0.00<br>026<br>734<br>4 | 6.90<br>279<br>E-<br>05 | Lacunisphaerauncultured_Opitutus                       | 0.00<br>031<br>703<br>3 | 8.18<br>576<br>E-<br>05 | Aggregatibacter_actinomycetemcomitans           | 0 | 0 | Legionella_geestiana                                    | 7.56<br>363<br>E-<br>05 | 1.95<br>292<br>E-<br>05 |
| Fastidiosipila_uncultured_bacterium                   | 0.00<br>043<br>544<br>5 | 0.00<br>011<br>243<br>1  | Paludibacteraceae_uncultured_Paludibacter           | 0.00<br>036<br>040<br>4 | 9.30<br>559<br>E-<br>05 | Kiritimatiella_WCHB141_uncultured_bacterium    | 0.00<br>026<br>734<br>4 | 6.90<br>279<br>E-<br>05 | Rhizorhapis_sp.                                        | 0.00<br>031<br>703<br>3 | 8.18<br>576<br>E-<br>05 | Aggregatibacter_sp.                             | 0 | 0 | Rhodopirella_planctomycete_str.                         | 7.40<br>647<br>E-<br>05 | 1.91<br>234<br>E-<br>05 |
| ASV_11696                                             | 0.00<br>043<br>167<br>7 | 0.00<br>011<br>145<br>7  | Runellauncultured_Runella                           | 0.00<br>036<br>040<br>4 | 9.30<br>559<br>E-<br>05 | Lachnospiraceae_uncultured_Roseburia           | 0.00<br>026<br>734<br>4 | 6.90<br>279<br>E-<br>05 | Prevotellauidentified                                  | 0.00<br>031<br>377<br>3 | 7.52<br>162<br>E-<br>05 | Agitococcus_lubricus_group_uncultured_bacterium | 0 | 0 | Spirosoma_escaliants                                    | 7.40<br>647<br>E-<br>05 | 1.91<br>234<br>E-<br>05 |
| ASV_6965                                              | 0.00<br>043<br>078<br>1 | 0.00<br>011<br>122<br>7  | Chitinophagales_37-13_uncultured_Saprosiraceae      | 0.00<br>035<br>997<br>1 | 9.29<br>441<br>E-<br>05 | Meiothermus_uncultured_bacterium               | 0.00<br>026<br>734<br>4 | 6.90<br>279<br>E-<br>05 | Mucilaginibacter_galli                                 | 0.00<br>031<br>204<br>7 | 8.05<br>702<br>E-<br>05 | Agitococcus_lubricus_group_sp.                  | 0 | 0 | Acidibacter_sp.                                         | 7.37<br>262<br>E-<br>05 | 1.90<br>365<br>E-<br>05 |
| ASV_20235                                             | 0.00<br>042<br>895<br>4 | 0.00<br>011<br>075<br>5  | Elusimicrobiota_Lineage_lb_uncultured_bacterium     | 0.00<br>035<br>997<br>1 | 9.29<br>441<br>E-<br>05 | Pseudarcobacter_uncultured_Arcobacter          | 0.00<br>026<br>734<br>4 | 6.90<br>279<br>E-<br>05 | ASV_21444                                              | 0.00<br>030<br>994<br>9 | 8.00<br>285<br>E-<br>05 | Agrococcus_sp.                                  | 0 | 0 | Actinomycetaceae_uncultured_metagenome                  | 7.37<br>282<br>E-<br>05 | 1.90<br>365<br>E-<br>05 |
| Bacteroides_uncultured_Bacteroides                    | 0.00<br>042<br>895<br>4 | 0.00<br>011<br>075<br>5  | Eggerthellaceae_DMER64_bacterium_enrichment         | 0.00<br>034<br>223<br>1 | 8.83<br>637<br>E-<br>05 | ASV_19606                                      | 0.00<br>026<br>491<br>8 | 6.84<br>015<br>E-<br>05 | ASV_2160                                               | 0.00<br>030<br>994<br>9 | 8.00<br>285<br>E-<br>05 | Agromyces_sp.                                   | 0 | 0 | ASV_10605                                               | 7.37<br>282<br>E-<br>05 | 1.90<br>365<br>E-<br>05 |
| Raineyia_orbicola                                     | 0.00<br>042<br>895<br>4 | 0.00<br>011<br>075<br>5  | Pseudomonadaceae_sp.                                | 0.00<br>034<br>223<br>1 | 8.83<br>637<br>E-<br>05 | Chitinophagales_37-13_uncultured_bacterium     | 0.00<br>026<br>491<br>8 | 6.84<br>015<br>E-<br>05 | ASV_7664                                               | 0.00<br>030<br>994<br>9 | 8.00<br>285<br>E-<br>05 | Ahniella_affigens                               | 0 | 0 | Candidatus_Alysiops_haera_uncultured_bacterium          | 7.37<br>282<br>E-<br>05 | 1.90<br>365<br>E-<br>05 |
| Rhodocyclaceae_sp.                                    | 0.00<br>042<br>895<br>4 | 0.00<br>011<br>075<br>5  | ASV_2285                                            | 0.00<br>033<br>710<br>1 | 8.70<br>391<br>E-<br>05 | Erysipelotrichaceae_sp.                        | 0.00<br>026<br>491<br>8 | 6.84<br>015<br>E-<br>05 | Mycobacterium_sp.                                      | 0.00<br>030<br>994<br>9 | 8.00<br>285<br>E-<br>05 | Ahniella_metagenome                             | 0 | 0 | Legionella_metagenome                                   | 2.82<br>262<br>E-<br>05 | 1.90<br>365<br>E-<br>05 |
| Solirubrobacterales_67-14_uncultured_Rubrobacteraceae | 0.00<br>042<br>895<br>4 | 0.00<br>011<br>075<br>5  | Bacillus_sp.                                        | 0.00<br>033<br>374<br>1 | 8.61<br>716<br>E-<br>05 | Isosphaeraceae_uncultured_metagenome           | 0.00<br>026<br>491<br>8 | 6.84<br>015<br>E-<br>05 | Rhodoluna_sp.                                          | 0.00<br>030<br>994<br>9 | 8.00<br>285<br>E-<br>05 | Ahniella_uncultured_bacterium                   | 0 | 0 | Treponema_denticola                                     | 7.37<br>282<br>E-<br>05 | 1.90<br>365<br>E-<br>05 |
| Sporichthya_uncultured_bacterium                      | 0.00<br>042<br>895<br>4 | 0.00<br>011<br>075<br>5  | Sphaerochaeta_globosa                               | 0.00<br>033<br>374<br>1 | 8.61<br>716<br>E-<br>05 | Methyloligellaceae_uncultured_bacterium        | 0.00<br>026<br>491<br>8 | 6.84<br>015<br>E-<br>05 | Selenomonas_lactifex                                   | 0.00<br>030<br>994<br>9 | 8.00<br>285<br>E-<br>05 | Akkermansia_sp.                                 | 0 | 0 | ASV_20495                                               | 7.36<br>829<br>E-<br>05 | 1.90<br>248<br>E-<br>05 |
| Sporosusaceae_uncultured_sp.                          | 0.00<br>042<br>895<br>4 | 0.00<br>011<br>075<br>5  | Methanoseta_sp.                                     | 0.00<br>032<br>968<br>0 | 8.51<br>251<br>E-<br>05 | Burkholderia-Caballeronia-Paraburkholderia_sp. | 0.00<br>026<br>251<br>6 | 6.77<br>813<br>E-<br>05 | Chlamydiae_sp.                                         | 0.00<br>030<br>926<br>2 | 7.98<br>511<br>E-<br>05 | Akkermansia_uncultured_bacterium                | 0 | 0 | ASV_16300                                               | 7.19<br>048<br>E-<br>05 | 1.85<br>657<br>E-<br>05 |
| Dehalococcoidia_S085_sp.                              | 0.00<br>042<br>523<br>8 | 0.00<br>010<br>979<br>6  | Microsillaceae_OLB12_uncultured_bacterium           | 0.00<br>032<br>968<br>8 | 8.51<br>251<br>E-<br>05 | Methanoregula_sp.                              | 0.00<br>026<br>251<br>6 | 6.77<br>813<br>E-<br>05 | Thermicolauncultured_Clostridiales                     | 0.00<br>030<br>926<br>2 | 7.98<br>511<br>E-<br>05 | Alcaligenaceae_sp.                              | 0 | 0 | Acidimicrobia_IMCC26256_uncultured_soil                 | 0.00<br>006<br>840<br>3 | 1.76<br>616<br>E-<br>05 |
| Sulfurospirillum_uncultured_soil                      | 0.00<br>042<br>523<br>8 | 0.00<br>010<br>979<br>6  | Ruminococcaceae_uncultured_sp.                      | 0.00<br>032<br>968<br>8 | 8.51<br>251<br>E-<br>05 | Eggerthellaceae_DNF00809_uncultured_bacterium  | 0.00<br>025<br>923<br>5 | 6.89<br>329<br>E-<br>05 | ASV_15330                                              | 0.00<br>029<br>866<br>3 | 7.71<br>145<br>E-<br>05 | Alcaligenes_sp.                                 | 0 | 0 | ASV_19866                                               | 0.00<br>006<br>840<br>3 | 1.76<br>616<br>E-<br>05 |
| Flavobacterium_lindanitolerans                        | 0.00<br>042<br>401<br>9 | 0.00<br>011<br>347<br>05 | Turicella_uncultured_bacterium                      | 0.00<br>032<br>968<br>8 | 8.51<br>251<br>E-<br>05 | Caulobacter_metagenome                         | 0.00<br>025<br>489<br>7 | 6.87<br>407<br>E-<br>05 | Firmicutes_D8A-2_uncultured_bacterium                  | 0.00<br>029<br>674<br>9 | 7.66<br>203<br>E-<br>05 | Algibacter_sp.                                  | 0 | 0 | ASV_19872                                               | 0.00<br>006<br>840<br>3 | 1.76<br>616<br>E-<br>05 |
| Candidatus_Dichloromethanomonas_uncultured_bacterium  | 0.00<br>042<br>310<br>1 | 0.00<br>010<br>924<br>4  | ASV_18786                                           | 0.00<br>032<br>968<br>8 | 8.51<br>251<br>E-<br>05 | ASV_17511                                      | 0.00<br>025<br>476<br>6 | 6.57<br>803<br>E-<br>05 | Actinomadura_sp.                                       | 0.00<br>029<br>205<br>6 | 7.54<br>085<br>E-<br>05 | Algoriphagus_sp.                                | 0 | 0 | Myxococota_sp.                                          | 0.00<br>006<br>840<br>3 | 1.76<br>616<br>E-<br>05 |
| Actinobacteriota_MB-A2-108_sp.                        | 0.00<br>041<br>592<br>4 | 0.00<br>010<br>739<br>1  | Candidatus_Megaira_sp.                              | 0.00<br>032<br>450<br>7 | 8.37<br>873<br>E-<br>05 | ASV_17516                                      | 0.00<br>025<br>476<br>6 | 6.57<br>803<br>E-<br>05 | ASV_8275                                               | 0.00<br>029<br>205<br>6 | 7.54<br>085<br>E-<br>05 | Algoriphagus_uncultured_Bacteroidetes           | 0 | 0 | Roseomonas_sp.                                          | 0.00<br>006<br>840<br>3 | 1.76<br>616<br>E-<br>05 |
| Alishewanella_uncultured_bacterium                    | 0.00<br>041<br>592<br>4 | 0.00<br>010<br>739<br>1  | Chloroplast_Tetrademus_obliquus                     | 0.00<br>032<br>450<br>7 | 8.37<br>873<br>E-<br>05 | Chloroplast_Guillardia_theta                   | 0.00<br>025<br>476<br>6 | 6.57<br>803<br>E-<br>05 | Candidatus_Planktophila_sp.                            | 0.00<br>029<br>205<br>6 | 7.54<br>085<br>E-<br>05 | Algoriphagus_uncultured_Hongiella               | 0 | 0 | ASV_2061                                                | 6.69<br>254<br>E-<br>05 | 1.72<br>801<br>E-<br>05 |
| Ilumatobacteraceae_uncultured_sp.                     | 0.00<br>041<br>592<br>4 | 0.00<br>010<br>739<br>1  | Janthinobacterium_sp.                               | 0.00<br>032<br>450<br>7 | 8.37<br>873<br>E-<br>05 | Haliaceae_OM60(NO R5)_clade_metagenome         | 0.00<br>025<br>476<br>6 | 6.57<br>803<br>E-<br>05 | Firmicutes_uncultured_bacterium                        | 0.00<br>029<br>205<br>6 | 7.54<br>085<br>E-<br>05 | Aliidimarina_uncultured_bacterium               | 0 | 0 | ASV_20943                                               | 6.69<br>254<br>E-<br>05 | 1.72<br>801<br>E-<br>05 |
| ASV_3349                                              | 0.00<br>041<br>581<br>8 | 7.50<br>13E-05           | Salinispira_metagenome                              | 0.00<br>032<br>450<br>7 | 8.37<br>873<br>E-<br>05 | Ruminococcaceae_uncultured_anaerobic_digester  | 0.00<br>025<br>476<br>6 | 6.57<br>803<br>E-<br>05 | Gracilbacteria_IGI_000069-P22Candidatus_Gracilbacteria | 0.00<br>029<br>205<br>6 | 7.54<br>085<br>E-<br>05 | Aliidongia_dinghuensis                          | 0 | 0 | Polynucleobacter_sp.                                    | 6.69<br>254<br>E-<br>05 | 1.72<br>801<br>E-<br>05 |
| ASV_2160                                              | 0.00<br>041<br>272<br>8 | 8.41<br>585<br>E-<br>05  | Candidatus_Vogelbacteria_uncultured_bacterium       | 0.00<br>032<br>015<br>4 | 8.26<br>634<br>E-<br>05 | ASV_4167                                       | 0.00<br>025<br>274<br>9 | 6.52<br>595<br>E-<br>05 | Myxococcaeae_P3OB-42_sp.                               | 0.00<br>029<br>205<br>6 | 7.54<br>085<br>E-<br>05 | Aliivibrio_sp.                                  | 0 | 0 | Acidiphilium_sp.                                        | 6.50<br>491<br>E-<br>05 | 1.67<br>956<br>E-<br>05 |
| ASV_5218                                              | 0.00<br>041<br>173<br>4 | 0.00<br>010<br>630<br>9  | Haliangium_metagenome                               | 0.00<br>032<br>015<br>4 | 8.26<br>634<br>E-<br>05 | LaribacterLaribacter_hongkongensis             | 0.00<br>025<br>183<br>4 | 6.50<br>233<br>E-<br>05 | Prevotellauidentified_eubacterium                      | 0.00<br>029<br>205<br>6 | 7.54<br>085<br>E-<br>05 | Alishewanella_sp.                               | 0 | 0 | Anaerolineae_A4b_metagenome                             | 6.50<br>491<br>E-<br>05 | 1.67<br>956<br>E-<br>05 |
| CCM19a_uncultured_gamma                               | 0.00<br>041<br>173<br>4 | 0.00<br>010<br>630<br>9  | Micrarchaeales_CG1-02-32-21_uncultured_archaeon     | 0.00<br>032<br>015<br>4 | 8.26<br>634<br>E-<br>05 | ASV_12420                                      | 0.00<br>025<br>150<br>3 | 6.49<br>378<br>E-<br>05 | Syntrophobacteruncultured_Syntrophobacter              | 0.00<br>029<br>205<br>6 | 7.54<br>085<br>E-<br>05 | Alishewanella_uncultured_bacterium              | 0 | 0 | Clostridia_UCG-014_uncultured_Firmicutes                | 6.50<br>491<br>E-<br>05 | 1.67<br>956<br>E-<br>05 |
| Diplorickeitsiaceae_uncultured_Coxiellaceae           | 0.00<br>041<br>173<br>4 | 0.00<br>010<br>630<br>9  | Rubrobacter_sp.                                     | 0.00<br>032<br>015<br>4 | 8.26<br>634<br>E-<br>05 | Filifactor_sp.                                 | 0.00<br>025<br>150<br>3 | 6.49<br>378<br>E-<br>05 | Vicinamibacteraceae_sp.                                | 0.00<br>029<br>205<br>6 | 7.54<br>085<br>E-<br>05 | Alistipes_gut_metagenome                        | 0 | 0 | Coproccoccus_sp.                                        | 6.50<br>491<br>E-<br>05 | 1.67<br>956<br>E-<br>05 |
| Isosphaeraceae_uncultured_Plantomycetaceae            | 0.00<br>041<br>173<br>4 | 0.00<br>010<br>630<br>9  | Akkermansia_sp.                                     | 0.00<br>031<br>393<br>9 | 8.10<br>587<br>E-<br>05 | Johnsonella_ignava                             | 0.00<br>025<br>150<br>3 | 6.49<br>378<br>E-<br>05 | Algoriphagus_sp.                                       | 0.00<br>029<br>064<br>7 | 7.50<br>447<br>E-<br>05 | Alistipes_sp.                                   | 0 | 0 | Desulfobacterium_catheolicum_group_uncultured_bacterium | 6.50<br>491<br>E-<br>05 | 1.67<br>956<br>E-<br>05 |
| Rubinsphaeraceae_uncultured_metagenome                | 0.00<br>041<br>173<br>4 | 0.00<br>010<br>630<br>9  | ASV_9544                                            | 0.00<br>031<br>393<br>9 | 8.10<br>587<br>E-<br>05 | Nevskia_uncultured_Nevskia                     | 0.00<br>025<br>110<br>9 | 6.48<br>361<br>E-<br>05 | Desulfosporosinus_sp.                                  | 0.00<br>029<br>064<br>7 | 7.50<br>447<br>E-<br>05 | Alistipes_uncultured_Alistipes                  | 0 | 0 | Flavobacterium_lindanitolerans                          | 6.50<br>491<br>E-<br>05 | 1.67<br>956<br>E-<br>05 |
| Thermoactinomycetaceae_uncultured_bacterium           | 0.00<br>041<br>12       | 0.00<br>010<br>617<br>1  | Candidatus_Collierbacteria_uncultured_soil          | 0.00<br>031<br>393<br>9 | 8.10<br>587<br>E-<br>05 | Xanthomonadaceae_Xanthomonas_sp.               | 0.00<br>025<br>110<br>9 | 6.48<br>361<br>E-<br>05 | Dyadobacter_sp.                                        | 0.00<br>029<br>064<br>7 | 7.50<br>447<br>E-<br>05 | Alistipes_uncultured_bacterium                  | 0 | 0 | Methanospirillum_uncultured_archaeon                    | 6.50<br>491<br>E-<br>05 | 1.67<br>956<br>E-<br>05 |
| Candidatus_Methylophilum_sp.                          | 0.00<br>041<br>000<br>4 | 0.00<br>010<br>586<br>3  | Cytophaga_metagenome                                | 0.00<br>031<br>393<br>9 | 8.10<br>587<br>E-<br>05 | ASV_2510                                       | 0.00<br>024<br>461<br>1 | 4.95<br>203<br>E-<br>05 | Eggerthia_catenaformis                                 | 0.00<br>029<br>064<br>7 | 7.50<br>447<br>E-<br>05 | Alistipes_uncultured_Bacteroidetes              | 0 | 0 | Nitrospira_sp.                                          | 6.50<br>491<br>E-<br>05 | 1.67<br>956<br>E-<br>05 |
| Chitinophaga_sp.                                      | 0.00<br>041<br>000<br>4 | 0.00<br>010<br>586<br>3  | Fibrella_sp.                                        | 0.00<br>031<br>393<br>9 | 8.10<br>587<br>E-<br>05 | Saprosiraceae_uncultured_Cytophaga             | 0.00<br>024<br>430<br>9 | 6.30<br>803<br>E-<br>05 | Flavisolibacter_sp.                                    | 0.00<br>029<br>064<br>7 | 7.50<br>447<br>E-<br>05 | Aliterella_cyanobacterium_OU_20                 | 0 | 0 | Pedosphaeraceae_uncultured_bacterium                    | 6.50<br>491<br>E-<br>05 | 1.67<br>956<br>E-<br>05 |
| Cloacibacterium_sp.                                   | 0.00<br>041<br>000<br>4 | 0.00<br>010<br>586<br>3  | Nitrosomonadaceae_GOUTA6_uncultured_beta            | 0.00<br>031<br>393<br>9 | 8.10<br>587<br>E-<br>05 | Campylobacter_curvus                           | 0.00<br>024<br>330<br>1 | 6.28<br>2E-05           | Clavibacter_sp.                                        | 0.00<br>027<br>533<br>5 | 7.10<br>912<br>E-<br>05 | Aliterella_sp.                                  | 0 | 0 | Proteocatella_uncultured_bacterium                      | 6.50<br>491<br>E-<br>05 | 1.67<br>956<br>E-<br>05 |

|                                                           |                         |                         |                                                      |                           |                         |                                             |                         |                         |                                                           |                           |                         |                                                            |   |   |                                                                  |                         |                         |
|-----------------------------------------------------------|-------------------------|-------------------------|------------------------------------------------------|---------------------------|-------------------------|---------------------------------------------|-------------------------|-------------------------|-----------------------------------------------------------|---------------------------|-------------------------|------------------------------------------------------------|---|---|------------------------------------------------------------------|-------------------------|-------------------------|
| Dongia_sp.                                                | 0.00<br>041<br>000<br>4 | 0.00<br>010<br>586<br>3 | Planctopirus_uncultured_bacterium                    | 0.00<br>031<br>393<br>9   | 8.10<br>587<br>E-<br>05 | Candidatus_Sacharimonas_sp.                 | 0.00<br>023<br>390<br>7 | 6.03<br>945<br>E-<br>05 | Prevotella_marshii                                        | 0.00<br>027<br>388<br>1   | 7.07<br>158<br>E-<br>05 | Aliterella_uncultured_bacterium                            | 0 |   | Elusimicrobiota_Lineage_IV_uncultured_Termite                    | 6.47<br>103<br>E-<br>05 | 1.67<br>081<br>E-<br>05 |
| Methylotenera_uncultured_Methylotenera                    | 0.00<br>040<br>908<br>9 | 0.00<br>010<br>562<br>6 | ASV_6176                                             | 0.00<br>031<br>531<br>7   | 5.84<br>896<br>E-<br>05 | CL500-29_marine_group_sp.                   | 0.00<br>023<br>390<br>7 | 6.03<br>945<br>E-<br>05 | Burkholderiales_sp.                                       | 0.00<br>026<br>391<br>1   | 5.03<br>606<br>E-<br>05 | Alkalibacter_uncultured_bacterium                          | 0 | 0 | Parachlamydiaceae_uncultured_metagenome                          | 6.45<br>401<br>E-<br>05 | 1.66<br>642<br>E-<br>05 |
| Sphingobacteriales_e_nv_OPS_17_uncultured_Sphingobacteria | 0.00<br>039<br>866<br>6 | 0.00<br>010<br>293<br>5 | ASV_16374                                            | 0.00<br>029<br>945<br>2   | 7.73<br>182<br>E-<br>05 | Parabacteroides_sp.                         | 0.00<br>023<br>390<br>7 | 6.03<br>945<br>E-<br>05 | Lachnospiraceae_uncultured_Lachnospiraceae_bacterium      | 0.00<br>026<br>259<br>8   | 6.78<br>025<br>E-<br>05 | Alkalibacterium_uncultured_bacterium                       | 0 | 0 | Desulfatiglanis_sp.                                              | 0.00<br>006<br>348<br>4 | 1.63<br>915<br>E-<br>05 |
| Daphnia_magna                                             | 0.00<br>039<br>569<br>8 | 0.00<br>010<br>216<br>9 | Aquicella_metagenome                                 | 0.00<br>027<br>811<br>8   | 7.18<br>098<br>E-<br>05 | Ruminiclostridium_metagenome                | 0.00<br>023<br>390<br>7 | 6.03<br>945<br>E-<br>05 | ASV_10385                                                 | 0.00<br>026<br>133<br>1   | 6.74<br>754<br>E-<br>05 | Alkanibacter_metagenome                                    | 0 | 0 | Microsillaceae_uncultured_metagenome                             | 0.00<br>006<br>348<br>4 | 1.63<br>915<br>E-<br>05 |
| Kineococcus_sp.                                           | 0.00<br>039<br>569<br>8 | 0.00<br>010<br>216<br>9 | Facklamia_sp.                                        | 0.00<br>027<br>811<br>8   | 7.18<br>098<br>E-<br>05 | Tychonema_CCAP_1459-11B_sp.                 | 0.00<br>023<br>390<br>7 | 6.03<br>945<br>E-<br>05 | Soorlia_sp.                                               | 0.00<br>026<br>133<br>1   | 6.74<br>754<br>E-<br>05 | Alkanindiges_sp.                                           | 0 | 0 | ASV_18695                                                        | 6.30<br>302<br>E-<br>05 | 1.62<br>743<br>E-<br>05 |
| Astrocacaulis_sp.                                         | 0.00<br>039<br>169<br>6 | 0.00<br>010<br>113<br>5 | ASV_20042                                            | 0.00<br>027<br>797<br>8   | 7.17<br>718<br>E-<br>05 | Elstera_uncultured_bacterium                | 0.00<br>022<br>993<br>8 | 5.93<br>697<br>E-<br>05 | Altererythrobacter_alpha_proteobacterium                  | 0.00<br>025<br>795<br>4   | 6.66<br>034<br>E-<br>05 | Alkanindiges_uncultured_bacterium                          | 0 | 0 | Solirubrobacteraceae_sp.                                         | 6.30<br>302<br>E-<br>05 | 1.62<br>743<br>E-<br>05 |
| ASV_19207                                                 | 0.00<br>039<br>169<br>6 | 0.00<br>010<br>113<br>5 | Leeia_uncultured_bacterium                           | 0.00<br>027<br>797<br>1   | 7.17<br>718<br>E-<br>05 | Bacteroides_pyogenes                        | 0.00<br>022<br>863<br>9 | 5.90<br>343<br>E-<br>05 | Candidatus_Alysiosphaera_metagenome                       | 0.00<br>025<br>795<br>4   | 6.66<br>034<br>E-<br>05 | Alkanindiges_uncultured_gamma                              | 0 | 0 | ASV_346                                                          | 6.14<br>402<br>E-<br>05 | 1.58<br>638<br>E-<br>05 |
| ASV_19219                                                 | 0.00<br>039<br>169<br>6 | 0.00<br>010<br>113<br>5 | T34_uncultured_Burkholderiales                       | 0.00<br>027<br>797<br>1   | 7.18<br>718<br>E-<br>05 | Flavobacterium_weaverense                   | 0.00<br>022<br>863<br>9 | 5.90<br>343<br>E-<br>05 | Endomicrobium_uncultured_bacterium                        | 0.00<br>025<br>795<br>4   | 6.66<br>034<br>E-<br>05 | Allobranchibius_sp.                                        | 0 | 0 | Shimazuella_uncultured_bacterium                                 | 6.14<br>402<br>E-<br>05 | 1.58<br>638<br>E-<br>05 |
| Candidatus_Roizman_bacteria_uncultured_bacterium          | 0.00<br>039<br>169<br>6 | 0.00<br>010<br>113<br>5 | Comamonadaceae_sp.                                   | 0.00<br>027<br>735<br>4   | 7.16<br>125<br>E-<br>05 | Planctothrix_NIVA-CYA_15_sp.                | 0.00<br>022<br>863<br>9 | 5.90<br>343<br>E-<br>05 | Flavobacterium_Bacteroidetes_bacterium                    | 0.00<br>025<br>795<br>4   | 6.66<br>034<br>E-<br>05 | Alloiococcus_uncultured_bacterium                          | 0 | 0 | Agrococcus_sp.                                                   | 6.10<br>352<br>E-<br>05 | 1.57<br>592<br>E-<br>05 |
| Chlamydiaeae_uncultured_bacterium                         | 0.00<br>039<br>169<br>6 | 0.00<br>010<br>113<br>5 | Solirubrobacterales_67-14_uncultured_actinobacterium | 0.00<br>027<br>735<br>4   | 7.16<br>125<br>E-<br>05 | Oribacterium_uncultured_organism            | 0.00<br>022<br>823<br>4 | 5.89<br>287<br>E-<br>05 | Patescibacteria_WWW_Eobacterium_enrichment                | 0.00<br>025<br>795<br>4   | 6.66<br>034<br>E-<br>05 | Alloprevotella_sp.                                         | 0 | 0 | ASV_18923                                                        | 6.10<br>352<br>E-<br>05 | 1.57<br>592<br>E-<br>05 |
| Clavibacter_sp.                                           | 0.00<br>039<br>169<br>6 | 0.00<br>010<br>113<br>5 | Pedospiraceae_S_H3-11_metagenome                     | 0.00<br>027<br>474<br>5   | 7.09<br>376<br>E-<br>05 | Leeia_uncultured_bacterium                  | 0.00<br>022<br>501<br>4 | 5.80<br>984<br>E-<br>05 | Sphingobacterium_sp.                                      | 0.00<br>025<br>795<br>4   | 6.66<br>034<br>E-<br>05 | Alloprevotella_tannerae                                    | 0 | 0 | ASV_18928                                                        | 6.10<br>352<br>E-<br>05 | 1.57<br>592<br>E-<br>05 |
| Gaiellales_uncultured_prokaryote                          | 0.00<br>039<br>169<br>6 | 0.00<br>010<br>113<br>5 | Chlamydiales_sp.                                     | 0.00<br>027<br>426<br>7   | 7.08<br>154<br>E-<br>05 | Proteiniclasticum_sp.                       | 0.00<br>022<br>501<br>4 | 5.80<br>984<br>E-<br>05 | Verrucomicrobiaeae_uncultured_uncultured_verrucomicrobium | 0.00<br>025<br>795<br>4   | 6.66<br>034<br>E-<br>05 | Alloprevotella_uncultured_Bacteroidales                    | 0 | 0 | Fermentimonas_sp.                                                | 6.10<br>352<br>E-<br>05 | 1.57<br>592<br>E-<br>05 |
| Haliangium_uncultured_Myxococcales                        | 0.00<br>039<br>169<br>6 | 0.00<br>010<br>113<br>5 | Oligoflexus_uncultured_delta                         | 0.00<br>027<br>116<br>2   | 4.85<br>848<br>E-<br>05 | Acanthopleuribacterium_uncultured_bacterium | 0.00<br>022<br>952<br>4 | 5.68<br>952<br>E-<br>05 | Aneurinibacillus_uncultured_bacterium                     | 0.00<br>025<br>698<br>-05 | 6.63<br>52E<br>-05      | Metamycoplasma_salivarium                                  | 0 | 0 |                                                                  | 6.10<br>352<br>E-<br>05 | 1.57<br>592<br>E-<br>05 |
| Ilumatobacteraceae_uncultured_metagenome                  | 0.00<br>039<br>169<br>6 | 0.00<br>010<br>113<br>5 | ASV_5961                                             | 0.00<br>026<br>652<br>5   | 6.88<br>165<br>E-<br>05 | ASV_16250                                   | 0.00<br>022<br>035<br>4 | 5.68<br>952<br>E-<br>05 | ASV_10098                                                 | 0.00<br>025<br>698<br>-05 | 6.63<br>52E<br>-05      | allotenuales_AKIW781_uncultured_bacterium                  | 0 | 0 | Micrococcus_sp.                                                  | 6.10<br>352<br>E-<br>05 | 1.57<br>592<br>E-<br>05 |
| Isosphaeraceae_uncultured_uncultured_soil                 | 0.00<br>039<br>169<br>6 | 0.00<br>010<br>113<br>5 | Gammaproteobacteria_CHAB-XI-31_uncultured_bacterium  | 0.00<br>025<br>960<br>5   | 6.70<br>297<br>E-<br>05 | Bacteroides_coprohilus                      | 0.00<br>022<br>035<br>4 | 5.68<br>952<br>E-<br>05 | Macromonas_sp.                                            | 0.00<br>025<br>698<br>-05 | 6.63<br>52E<br>-05      | alpha_proteobacterium                                      | 0 | 0 | Planctomycetes_Pla4_lineage_sp.                                  | 6.10<br>352<br>E-<br>05 | 1.57<br>592<br>E-<br>05 |
| Pseudonocardia_sp.                                        | 0.00<br>039<br>169<br>6 | 0.00<br>010<br>113<br>5 | Gemmatimonadaceae_uncultured_soil                    | 0.00<br>025<br>960<br>5   | 6.70<br>297<br>E-<br>05 | Zoogloea_sp.                                | 0.00<br>022<br>035<br>4 | 5.68<br>952<br>E-<br>05 | Candidatus_Campellobacteria_sp.                           | 0.00<br>025<br>401<br>8   | 6.55<br>872<br>E-<br>05 | Alphaproteobacteria_bacterium                              | 0 | 0 | ASV_305                                                          | 5.80<br>254<br>E-<br>05 | 1.06<br>312<br>E-<br>05 |
| Sphingobacteriales_AKYH767_uncultured_bacterium           | 0.00<br>039<br>169<br>6 | 0.00<br>010<br>113<br>5 | Pedospiraceae_S_H3-11_uncultured_Verrucomicrobia     | 0.00<br>025<br>960<br>5   | 6.70<br>297<br>E-<br>05 | Treponema_genomos_p.                        | 0.00<br>022<br>034<br>6 | 5.68<br>931<br>E-<br>05 | Dehalococcoidia_RB_G-13-46-9_uncultured_bacterium         | 0.00<br>025<br>109<br>6   | 6.48<br>327<br>E-<br>05 | Alphaproteobacteria_sp.                                    | 0 | 0 | Pedospiraceae_S_H3-11_sp.                                        | 5.64<br>726<br>E-<br>05 | 1.12<br>812<br>E-<br>05 |
| Spirochaetota_MVP-15_uncultured_bacterium                 | 0.00<br>039<br>169<br>6 | 0.00<br>010<br>113<br>5 | Dechloromonas_sp.                                    | 0.00<br>025<br>667<br>4   | 6.62<br>729<br>E-<br>05 | ASV_2862                                    | 0.00<br>021<br>787<br>6 | 3.60<br>111<br>E-<br>05 | Elusimicrobia_MVP-88_uncultured_bacterium                 | 0.00<br>025<br>109<br>6   | 6.48<br>327<br>E-<br>05 | alphaproteobacteria_uncultured_bacterium                   | 0 | 0 | ASV_1208                                                         | 5.29<br>033<br>E-<br>05 | 1.36<br>596<br>E-<br>05 |
| Sumerlaeae_metagenome                                     | 0.00<br>039<br>169<br>6 | 0.00<br>010<br>113<br>5 | Schlesneria_sp.                                      | 0.00<br>025<br>667<br>4   | 6.62<br>729<br>E-<br>05 | ASV_6194                                    | 0.00<br>021<br>5        | 5.55<br>128<br>E-<br>05 | Streptomycetaceae_sp.                                     | 0.00<br>025<br>109<br>6   | 6.48<br>327<br>E-<br>05 | Alphaproteobacteria_uncultured_bacterium                   | 0 | 0 | ASV_2850                                                         | 5.29<br>033<br>E-<br>05 | 1.36<br>596<br>E-<br>05 |
| Arsenicococcus_boidensis                                  | 0.00<br>037<br>519<br>9 | 9.68<br>76E<br>-05      | Campylobacter_concissus                              | 0.00<br>024<br>839<br>-05 | 6.41<br>34E<br>-05      | Lautropia_sp.                               | 0.00<br>021<br>230<br>5 | 5.48<br>169<br>E-<br>05 | ASV_20431                                                 | 0.00<br>024<br>106<br>1   | 6.22<br>417<br>E-<br>05 | Alphaproteobacteria_uncultured_metagenome                  | 0 | 0 | Lactobacillales_P5D1-392_uncultured_bacterium                    | 5.28<br>044<br>E-<br>05 | 1.36<br>34E<br>-05      |
| ASV_19823                                                 | 0.00<br>037<br>519<br>9 | 9.68<br>76E<br>-05      | Chryseobacterium_uncultured_Bacteroidetes            | 0.00<br>024<br>839<br>-05 | 6.41<br>34E<br>-05      | Xanthomonadaceae_uncultured_bacterium       | 0.00<br>021<br>053<br>4 | 5.43<br>596<br>E-<br>05 | Christensenellaceae_R-7_group_uncultured_compost          | 0.00<br>024<br>106<br>1   | 6.22<br>417<br>E-<br>05 | Alphaproteobacteria_uncultured_sp.                         | 0 | 0 | Candidatus_Colwellbacteria                                       | 5.13<br>022<br>E-<br>05 | 1.32<br>462<br>E-<br>05 |
| Candidatus_Competibacter_sp.                              | 0.00<br>037<br>519<br>9 | 9.68<br>76E<br>-05      | Anaerovoracaceae_Family_XIII_AD3011_group_sp.        | 0.00<br>024<br>026<br>9   | 6.20<br>372<br>E-<br>05 | Clostridium_vincenzii                       | 0.00<br>020<br>119<br>6 | 5.19<br>486<br>E-<br>05 | Corynebacterium_propinquum                                | 0.00<br>024<br>106<br>1   | 6.22<br>417<br>E-<br>05 | Alphaproteobacteria_uncultured_Alphaproteobacteria         | 0 | 0 | Candidatus_Giovannobacteria_sp.                                  | 5.13<br>022<br>E-<br>05 | 1.32<br>462<br>E-<br>05 |
| Candidatus_Planktophila_uncultured_bacterium              | 0.00<br>037<br>519<br>9 | 9.68<br>76E<br>-05      | Corynebacterium_amycolatum                           | 0.00<br>024<br>026<br>9   | 6.20<br>372<br>E-<br>05 | Opitutus_uncultured_bacterium               | 0.00<br>020<br>119<br>6 | 5.19<br>486<br>E-<br>05 | Simkaniaceae_sp.                                          | 0.00<br>024<br>106<br>1   | 6.22<br>417<br>E-<br>05 | Alphaproteobacteria_uncultured_bacterium_enrichment        | 0 | 0 | Gastranaerophilales_uncultured_bacterium                         | 5.13<br>022<br>E-<br>05 | 1.32<br>462<br>E-<br>05 |
| Chloroplast_Cinnamomum_camphora                           | 0.00<br>037<br>519<br>9 | 9.68<br>76E<br>-05      | Lachnospiraceae_uncultured_Clostridiaceae_bacterium  | 0.00<br>024<br>026<br>9   | 6.20<br>372<br>E-<br>05 | ASV_3630                                    | 0.00<br>020<br>066<br>8 | 3.99<br>862<br>E-<br>05 | Ralstonia_sp.                                             | 0.00<br>023<br>777<br>4   | 6.13<br>93E<br>-05      | Alphaproteobacteria_uncultured_eubacterium                 | 0 | 0 | Gemmatimonas_sp.                                                 | 5.13<br>022<br>E-<br>05 | 1.32<br>462<br>E-<br>05 |
| Pajaroellobacter_sp.                                      | 0.00<br>037<br>519<br>9 | 9.68<br>76E<br>-05      | Alphaproteobacteria_uncultured_sp.                   | 0.00<br>023<br>998<br>1   | 6.19<br>628<br>E-<br>05 | Anaerolineaceae_uncultured_delta            | 0.00<br>020<br>050<br>8 | 5.17<br>709<br>E-<br>05 | ASV_10316                                                 | 0.00<br>023<br>708<br>3   | 6.12<br>146<br>E-<br>05 | Alphaproteobacteria_uncultured_gut_metagenome              | 0 | 0 | Porphyromonas_uncultured_bacterium                               | 5.13<br>022<br>E-<br>05 | 1.32<br>462<br>E-<br>05 |
| Aerococcus_sp.                                            | 0.00<br>037<br>208<br>3 | 9.60<br>714<br>E-<br>05 | ASV_5084                                             | 0.00<br>023<br>998<br>1   | 6.19<br>628<br>E-<br>05 | Bdellovibrionaceae_O_M27_clade_sp.          | 0.00<br>020<br>050<br>8 | 5.17<br>709<br>E-<br>05 | Alphaproteobacteria_bacterium                             | 0.00<br>023<br>251<br>8   | 6.00<br>359<br>E-<br>05 | Alphaproteobacteria_uncultured_Laobacterium_aquatile       | 0 | 0 | Sphingobacteriales_N_S11-12_marine_group_uncultured_Cytophagales | 5.13<br>022<br>E-<br>05 | 1.32<br>462<br>E-<br>05 |
| Pseudomonas_graminis                                      | 0.00<br>037<br>208<br>3 | 9.60<br>714<br>E-<br>05 | Chloroplast_Oscillatoriales_cyanobacterium           | 0.00<br>023<br>998<br>1   | 6.19<br>628<br>E-<br>05 | Filimonas_lacunae                           | 0.00<br>020<br>050<br>8 | 5.17<br>709<br>E-<br>05 | ASV_4527                                                  | 0.00<br>023<br>251<br>8   | 6.00<br>359<br>E-<br>05 | Alphaproteobacteria_uncultured_Novosphingobium             | 0 | 0 | Caulobacter_metagenome                                           | 5.04<br>242<br>E-<br>05 | 1.30<br>195<br>E-<br>05 |
| Neisseriaceae_uncultured_organism                         | 0.00<br>037<br>203<br>8 | 9.60<br>598<br>E-<br>05 | Margulisbacteria_sp.                                 | 0.00<br>023<br>998<br>1   | 6.19<br>628<br>E-<br>05 | Isosphaeraceae_sp.                          | 0.00<br>020<br>050<br>8 | 5.17<br>709<br>E-<br>05 | Sandaracinaceae_uncultured_Oryza_longistaminata           | 0.00<br>023<br>194<br>7   | 5.98<br>885<br>E-<br>05 | Alphaproteobacteria_uncultured_Rhodospirillaceae_bacterium | 0 | 0 | Corynebacterium_auri_mucosum                                     | 5.04<br>242<br>E-<br>05 | 1.30<br>195<br>E-<br>05 |
| ASV_2433                                                  | 0.00<br>037<br>189<br>9 | 9.60<br>239<br>E-<br>05 | Burkholderiales_SC-I-84_sp.                          | 0.00<br>021<br>979<br>2   | 5.67<br>501<br>E-<br>05 | Jatrophihabians_sp.                         | 0.00<br>020<br>050<br>8 | 5.17<br>709<br>E-<br>05 | TaibaiellaTaibaiella_sp.                                  | 0.00<br>023<br>194<br>7   | 5.98<br>885<br>E-<br>05 | Altererythrobacter_alpha_proteobacterium                   | 0 | 0 | Corynebacterium_propinquum                                       | 5.04<br>242<br>E-<br>05 | 1.30<br>195<br>E-<br>05 |
| Ignatzschineria_swin_e_effluent                           | 0.00<br>036<br>287<br>1 | 9.36<br>929<br>E-<br>05 | Oscillospiraceae_UC_G-005_sp.                        | 0.00<br>021<br>979<br>2   | 5.67<br>501<br>E-<br>05 | Kocuria_marina                              | 0.00<br>020<br>050<br>8 | 5.17<br>709<br>E-<br>05 | Clostridia_vadinBB60_group_Clostridiales_bacterium        | 0.00<br>022<br>988<br>1   | 4.58<br>29E<br>-05      | Altererythrobacter_sp.                                     | 0 | 0 | Phaseolycystis_uncultured_Polyangiaceae                          | 5.04<br>242<br>E-<br>05 | 1.30<br>195<br>E-<br>05 |

|                                                    |                         |                         |                                                       |                         |                         |                                                     |                         |                         |                                                |                         |                         |                                               |   |   |                                                          |                         |                         |
|----------------------------------------------------|-------------------------|-------------------------|-------------------------------------------------------|-------------------------|-------------------------|-----------------------------------------------------|-------------------------|-------------------------|------------------------------------------------|-------------------------|-------------------------|-----------------------------------------------|---|---|----------------------------------------------------------|-------------------------|-------------------------|
| Diploricetisaceae_ uncultured_bacterium_enrichment | 0.00<br>036<br>242<br>4 | 9.35<br>775<br>E-<br>05 | Acholeplasma_laidlawii                                | 0.00<br>021<br>389<br>5 | 5.52<br>275<br>E-<br>05 | Parcubacteria_wastewater_metagenome                 | 0.00<br>020<br>050<br>8 | 5.17<br>709<br>E-<br>05 | Amb-16S-1323_uncultured_bacterium              | 0.00<br>022<br>826<br>9 | 5.89<br>388<br>E-<br>05 | Alysiella_sp.                                 | 0 | 0 | ASV_19144                                                | 4.91<br>521<br>E-<br>05 | 1.26<br>91E<br>-05      |
| Woeseia_sp.                                        | 0.00<br>036<br>242<br>4 | 9.35<br>775<br>E-<br>05 | ASV_18835                                             | 0.00<br>021<br>389<br>5 | 5.52<br>275<br>E-<br>05 | Phascloartobacterium_ uncultured_Veillonella_caeae  | 0.00<br>020<br>050<br>8 | 5.17<br>709<br>E-<br>05 | Eubacterium_minutum                            | 0.00<br>022<br>625      | 5.84<br>175<br>E-<br>05 | Amaricoccus_sp.                               | 0 | 0 | Chloroflexi_KD4-96_metagenome                            | 4.91<br>521<br>E-<br>05 | 1.26<br>91E<br>-05      |
| Dysgonomonadaceae_ uncultured_Petrimonas           | 0.00<br>035<br>972<br>5 | 9.28<br>806<br>E-<br>05 | Beggiatoa_metagenome                                  | 0.00<br>021<br>389<br>5 | 5.52<br>275<br>E-<br>05 | Sediminibacterium_sp.                               | 0.00<br>020<br>050<br>8 | 5.17<br>709<br>E-<br>05 | Prevotella_disiens                             | 0.00<br>022<br>625      | 5.84<br>175<br>E-<br>05 | Amaricoccus_tamworthensis                     | 0 | 0 | Luedemannella_sp.                                        | 4.91<br>521<br>E-<br>05 | 1.26<br>91E<br>-05      |
| Bacteriovorax_ uncultured_delta                    | 0.00<br>035<br>650<br>6 | 9.20<br>495<br>E-<br>05 | Lachnospirales_ uncultured_bacterium                  | 0.00<br>021<br>389<br>5 | 5.52<br>275<br>E-<br>05 | Silvanigrellaceae_ uncultured_bacterium             | 0.00<br>020<br>050<br>8 | 5.17<br>709<br>E-<br>05 | SediminispirochaetaS_pirochaeta_sp.            | 0.00<br>022<br>441      | 5.79<br>424<br>E-<br>05 | Amb-16S-1323_uncultured_bacterium             | 0 | 0 | Mitochondria_Eukaryota_sp.                               | 4.91<br>521<br>E-<br>05 | 1.26<br>91E<br>-05      |
| Nocardioides_ganghwensis                           | 0.00<br>035<br>650<br>6 | 9.20<br>495<br>E-<br>05 | Kocuria_marina                                        | 0.00<br>021<br>322      | 5.50<br>532<br>E-<br>05 | Sphingobacterium_the_mrophium                       | 0.00<br>020<br>050<br>8 | 5.17<br>709<br>E-<br>05 | Pseudolabrys_sp.                               | 0.00<br>022<br>399<br>8 | 5.78<br>36E<br>-05      | Aminobacter_sp.                               | 0 | 0 | Nitrosomonadaceae_ uncultured_metagenome                 | 4.91<br>521<br>E-<br>05 | 1.26<br>91E<br>-05      |
| Neisseriaceae_ uncultured_Neisseriaceae_bacterium  | 0.00<br>034<br>680<br>1 | 8.95<br>436<br>E-<br>05 | Novosphingobium_sp.                                   | 0.00<br>021<br>322      | 5.50<br>532<br>E-<br>05 | Turneriella_metagenome                              | 0.00<br>020<br>050<br>8 | 5.17<br>709<br>E-<br>05 | Candidatus_Limnoluna_ uncultured_bacterium     | 0.00<br>022<br>089      | 4.76<br>85E<br>-05      | Ammonibacillus_agariferforans                 | 0 | 0 | ASV_21506                                                | 4.91<br>219<br>E-<br>05 | 1.26<br>832<br>E-<br>05 |
| Catenisphaera_ uncultured_rumen                    | 0.00<br>033<br>848<br>1 | 8.73<br>954<br>E-<br>05 | Thermoflexibacter_sp.                                 | 0.00<br>021<br>322      | 5.50<br>532<br>E-<br>05 | Vicinamibacteria_ uncultured_bacterium              | 0.00<br>020<br>050<br>8 | 5.17<br>709<br>E-<br>05 | Legionella_sp.                                 | 0.00<br>020<br>663<br>3 | 5.33<br>524<br>E-<br>05 | Ammoniphilus_oxalaticus                       | 0 | 0 | ASV_6442                                                 | 4.91<br>219<br>E-<br>05 | 1.26<br>832<br>E-<br>05 |
| Anaeromyxobacter_d_ ehalogenans                    | 0.00<br>033<br>470<br>9 | 8.64<br>215<br>E-<br>05 | Berkelbacteria_ uncultured_red_organism               | 0.00<br>021<br>290<br>6 | 5.49<br>721<br>E-<br>05 | Bacteroidetes_BD2-2_sp.                             | 0.00<br>019<br>868<br>9 | 5.13<br>513<br>E-<br>05 | Spirochaeta_aurantia                           | 0.00<br>020<br>663<br>3 | 5.33<br>524<br>E-<br>05 | Amnibacterium_sp.                             | 0 | 0 | Burkholderiales_sp.                                      | 4.91<br>219<br>E-<br>05 | 1.26<br>832<br>E-<br>05 |
| Croceicoccus_sp.                                   | 0.00<br>033<br>470<br>9 | 8.64<br>215<br>E-<br>05 | Candidatus_Microthrix_sp.                             | 0.00<br>020<br>929<br>3 | 5.40<br>392<br>E-<br>05 | Blautila_sp.                                        | 0.00<br>019<br>868<br>9 | 5.13<br>513<br>E-<br>05 | Solirubrobacterales_67-14_ uncultured_organism | 0.00<br>020<br>544<br>2 | 5.30<br>449<br>E-<br>05 | Amniplea_sp.                                  | 0 | 0 | Emticicia_sp.                                            | 4.91<br>219<br>E-<br>05 | 1.26<br>832<br>E-<br>05 |
| Desulfovibrio_gut_m_ etagenome                     | 0.00<br>033<br>470<br>9 | 8.64<br>215<br>E-<br>05 | Anaerolineaceae_ uncultured_metagenome                | 0.00<br>020<br>847<br>8 | 5.38<br>288<br>E-<br>05 | Candidatus_Jorgensenbacteria_Parcubacteria_group    | 0.00<br>019<br>868<br>9 | 5.13<br>513<br>E-<br>05 | Truepera_ uncultured_bacterium                 | 0.00<br>020<br>544<br>2 | 5.30<br>449<br>E-<br>05 | Amycolatopsis_sp.                             | 0 | 0 | Vicinamibacteria_ uncultured_sp.                         | 4.91<br>219<br>E-<br>05 | 1.26<br>832<br>E-<br>05 |
| Flavobacterium_ ardeleyense                        | 0.00<br>033<br>470<br>9 | 8.64<br>215<br>E-<br>05 | ASV_4909                                              | 0.00<br>020<br>847<br>8 | 5.38<br>288<br>E-<br>05 | Saccharimonadales_L_WQ8_metagenome                  | 0.00<br>019<br>868<br>9 | 5.13<br>513<br>E-<br>05 | Cryptobacterium_sp.                            | 0.00<br>020<br>321<br>4 | 5.24<br>696<br>E-<br>05 | Anaerobacterium_ uncultured_bacterium         | 0 | 0 | Bifid19_ uncultured_bacterium                            | 4.88<br>281<br>E-<br>05 | 1.26<br>074<br>E-<br>05 |
| ASV_4527                                           | 0.00<br>033<br>001<br>4 | 7.57<br>604<br>E-<br>05 | ASV_7512                                              | 0.00<br>020<br>847<br>8 | 5.38<br>288<br>E-<br>05 | Cloacibacterium_sp.                                 | 0.00<br>019<br>846<br>2 | 5.12<br>427<br>E-<br>05 | C1-B045_gamma_proteobacterium                  | 0.00<br>019<br>994      | 5.16<br>243<br>E-<br>05 | Anaerobiospirillum_succiniciproducens         | 0 | 0 | Candidatus_Woesebacteria_ uncultured_eubacterium         | 4.88<br>281<br>E-<br>05 | 1.26<br>074<br>E-<br>05 |
| Candidatus_Finniella_ uncultured_bacterium         | 0.00<br>032<br>800<br>3 | 8.46<br>9E-<br>05       | Chloroplast_Melosira_varians                          | 0.00<br>020<br>847<br>8 | 5.38<br>288<br>E-<br>05 | Anaerovoracaceae_Family_XIII_UCG-004Eubacterium_sp. | 0.00<br>019<br>530<br>7 | 5.04<br>281<br>E-<br>05 | Fluvicola_sp.                                  | 0.00<br>019<br>994      | 5.16<br>243<br>E-<br>05 | Anaerococcus_hydrogenalis                     | 0 | 0 | Capnocytophaga_granulosa                                 | 4.88<br>281<br>E-<br>05 | 1.26<br>074<br>E-<br>05 |
| Chloroplast_Chloromonas_radiata                    | 0.00<br>032<br>800<br>3 | 8.46<br>9E-<br>05       | Cytophaga_hutchinsonii                                | 0.00<br>020<br>527<br>5 | 5.31<br>115<br>E-<br>05 | Propionibacteriaceae_sp.                            | 0.00<br>019<br>530<br>7 | 5.04<br>281<br>E-<br>05 | Hungateiclostridiaceae_sp.                     | 0.00<br>019<br>994      | 5.16<br>243<br>E-<br>05 | Anaerococcus_prevotii                         | 0 | 0 | Acetitomaculum_sp.                                       | 4.87<br>868<br>E-<br>05 | 1.25<br>967<br>E-<br>05 |
| Erysipelotrichaceae_UCG-003_sp.                    | 0.00<br>032<br>800<br>3 | 8.46<br>9E-<br>05       | ASV_12032                                             | 0.00<br>019<br>516<br>3 | 5.03<br>909<br>E-<br>05 | Alphaproteobacteria_ uncultured_Novosphingobium     | 0.00<br>018<br>887<br>5 | 4.87<br>673<br>E-<br>05 | ASV_21656                                      | 0.00<br>019<br>470<br>4 | 5.02<br>724<br>E-<br>05 | Anaerococcus_sp.                              | 0 | 0 | Apibacter_sp.                                            | 4.85<br>327<br>E-<br>05 | 1.25<br>311<br>E-<br>05 |
| Paracaedibacteraceae_ uncultured_metagenome        | 0.00<br>032<br>800<br>3 | 8.46<br>9E-<br>05       | ASV_21156                                             | 0.00<br>019<br>470<br>4 | 5.02<br>724<br>E-<br>05 | ASV_17446                                           | 0.00<br>018<br>887<br>5 | 4.87<br>673<br>E-<br>05 | ASV_21657                                      | 0.00<br>019<br>470<br>4 | 5.02<br>724<br>E-<br>05 | Anaerococcus_ uncultured_bacterium            | 0 | 0 | Candidatus_Magasanikibacteria_Parcubacteria_group        | 4.84<br>051<br>E-<br>05 | 1.24<br>981<br>E-<br>05 |
| Pseudokinococcus_sp.                               | 0.00<br>032<br>800<br>3 | 8.46<br>9E-<br>05       | Aureimonas_sp.                                        | 0.00<br>019<br>470<br>4 | 5.02<br>724<br>E-<br>05 | Patesicobacteria_CPR2_ uncultured_Firmicutes        | 0.00<br>018<br>887<br>5 | 4.87<br>673<br>E-<br>05 | Pedospaeraceae_S_H3-11_ uncultured_bacterium   | 0.00<br>019<br>470<br>4 | 5.02<br>724<br>E-<br>05 | Anaerocolumna_ uncultured_red_bacterium       | 0 | 0 | Aquicella_ uncultured_bacterium                          | 0.00<br>004<br>461<br>7 | 1.15<br>201<br>E-<br>05 |
| Coriobacteria_OPB4_ uncultured_Coriobacteria       | 0.00<br>032<br>375<br>3 | 8.35<br>927<br>E-<br>05 | Christensenellaceae_R-7_group_ unidentified_rumen     | 0.00<br>019<br>470<br>4 | 5.02<br>724<br>E-<br>05 | Aeromonas_sp.                                       | 0.00<br>018<br>751<br>2 | 4.84<br>154<br>E-<br>05 | Anaerolineaceae_ uncultured_sp.                | 0.00<br>018<br>666<br>5 | 4.81<br>967<br>E-<br>05 | Anaerofilum_ uncultured_Anaerofilum           | 0 | 0 | Arenimonas_oryziterrae                                   | 0.00<br>004<br>461<br>7 | 1.15<br>201<br>E-<br>05 |
| GKS98_freshwater_group_sp.                         | 0.00<br>032<br>375<br>3 | 8.35<br>927<br>E-<br>05 | Isophaeraceae_ uncultured_sp.                         | 0.00<br>019<br>470<br>4 | 5.02<br>724<br>E-<br>05 | ASV_19081                                           | 0.00<br>018<br>751<br>2 | 4.84<br>154<br>E-<br>05 | Candidatus_Anammoximicrobium_sp.               | 0.00<br>018<br>666<br>5 | 4.81<br>967<br>E-<br>05 | Anaerofustis_ uncultured_bacterium            | 0 | 0 | Candidatus_Amesbacteria                                  | 0.00<br>004<br>461<br>7 | 1.15<br>201<br>E-<br>05 |
| ASV_21307                                          | 0.00<br>032<br>171<br>6 | 8.30<br>667<br>E-<br>05 | Oligoflexia_ uncultured_metagenome                    | 0.00<br>019<br>470<br>4 | 5.02<br>724<br>E-<br>05 | Beijerinckiaceae_1174-901-12_sp.                    | 0.00<br>018<br>751<br>2 | 4.84<br>154<br>E-<br>05 | CL500-29_marine_group_m_ etagenome             | 0.00<br>018<br>666<br>5 | 4.81<br>967<br>E-<br>05 | Anaeroglobus_ uncultured_organism             | 0 | 0 | MBNT15_ uncultured_bacterium                             | 0.00<br>004<br>461<br>7 | 1.15<br>201<br>E-<br>05 |
| Candidatus_Falkowbacteria_sp.                      | 0.00<br>032<br>171<br>6 | 8.30<br>667<br>E-<br>05 | Paenibacillus_gluconolyticus                          | 0.00<br>018<br>284<br>5 | 4.72<br>104<br>E-<br>05 | DEV114_metagenome                                   | 0.00<br>018<br>751<br>2 | 4.84<br>154<br>E-<br>05 | Mesorhizobium_sp.                              | 0.00<br>018<br>666<br>5 | 4.81<br>967<br>E-<br>05 | Anaerolineaceae_sp.                           | 0 | 0 | Nitrosomonadaceae_Elim6067_ uncultured_beta              | 0.00<br>004<br>461<br>7 | 1.15<br>201<br>E-<br>05 |
| Gammaaproteobacteria_ uncultured_organism          | 0.00<br>032<br>171<br>6 | 8.30<br>667<br>E-<br>05 | Luteolibacter_ uncultured_Verrucomicrobiaceae         | 0.00<br>017<br>742<br>1 | 4.68<br>099<br>E-<br>05 | Fimbrilobus_ uncultured_DPlanctomycetales           | 0.00<br>018<br>751<br>2 | 4.84<br>154<br>E-<br>05 | Pseudarcobacter_sp.                            | 0.00<br>018<br>666<br>5 | 4.81<br>967<br>E-<br>05 | Anaerolineaceae_UCG-001_ uncultured_bacterium | 0 | 0 | Patesicobacteria_sp.                                     | 0.00<br>004<br>461<br>7 | 1.15<br>201<br>E-<br>05 |
| Paludibacter_sp.                                   | 0.00<br>032<br>171<br>6 | 8.30<br>667<br>E-<br>05 | Aestuarcella_ uncultured_bacterium                    | 0.00<br>017<br>111<br>6 | 4.41<br>82E<br>-05      | Babeliales_UBA12409_sp.                             | 0.00<br>018<br>712<br>6 | 4.83<br>157<br>E-<br>05 | Thermoleophilia_ uncultured_bacterium          | 0.00<br>018<br>666<br>5 | 4.81<br>967<br>E-<br>05 | Anaerolineaceae_ uncultured_bacterium         | 0 | 0 | Microsillaceae_ uncultured_Flexibacter                   | 4.43<br>636<br>E-<br>05 | 1.14<br>546<br>E-<br>05 |
| Parcubacteria_wastewater_metagenome                | 0.00<br>032<br>171<br>6 | 8.30<br>667<br>E-<br>05 | Haliaceae_sp.                                         | 0.00<br>017<br>111<br>6 | 4.41<br>82E<br>-05      | Saprosiraceae_sp.                                   | 0.00<br>018<br>712<br>6 | 4.83<br>157<br>E-<br>05 | Alloicoccus_ uncultured_bacterium              | 0.00<br>018<br>355<br>7 | 4.73<br>942<br>E-<br>05 | Anaerolineaceae_ uncultured_metagenome        | 0 | 0 | Deep_Sea_Euryarchaeotic_Group(DSEG)_ uncultured_archaeon | 4.23<br>227<br>E-<br>05 | 1.09<br>277<br>E-<br>05 |
| Prostheobacter_ uncultured_bacterium               | 0.00<br>032<br>171<br>6 | 8.30<br>667<br>E-<br>05 | Sporomusaceae_ uncultured_ uncultured_Veillonellaceae | 0.00<br>017<br>111<br>6 | 4.41<br>82E<br>-05      | Shinella_sp.                                        | 0.00<br>018<br>712<br>6 | 4.83<br>157<br>E-<br>05 | Rs-M59_termite_group_ uncultured_bacterium     | 0.00<br>018<br>097<br>6 | 4.67<br>278<br>E-<br>05 | Anaerolineaceae_ uncultured_sp.               | 0 | 0 | Microsillaceae_ uncultured_Cytophagales_bacterium        | 4.22<br>436<br>E-<br>05 | 1.09<br>073<br>E-<br>05 |
| Ruminococcus_sp.                                   | 0.00<br>032<br>171<br>6 | 8.30<br>667<br>E-<br>05 | TaibaialaBacteroidetes_bacterium                      | 0.00<br>017<br>111<br>6 | 4.41<br>82E<br>-05      | ASV_3544                                            | 0.00<br>018<br>682<br>5 | 4.82<br>38E<br>-05      | uncultured_Capnocytophaga                      | 0.00<br>017<br>916<br>3 | 3.47<br>825<br>E-<br>05 | Anaerolineaceae_ uncultured_ uncultured_soil  | 0 | 0 | Moraxellaceae_ uncultured_metagenome                     | 4.22<br>436<br>E-<br>05 | 1.09<br>073<br>E-<br>05 |
| Thermoanaerobacterium_sp.                          | 0.00<br>032<br>171<br>6 | 8.30<br>667<br>E-<br>05 | Altererythrobaacter_sp.                               | 0.00<br>016<br>687<br>5 | 4.30<br>859<br>E-<br>05 | Frankiales_sp.                                      | 0.00<br>018<br>682<br>5 | 4.82<br>38E<br>-05      | Candidatus_Finniella_sp.                       | 0.00<br>017<br>438<br>8 | 4.50<br>268<br>E-<br>05 | Anaerolineaceae_ uncultured_Belliinea         | 0 | 0 | ASV_20029                                                | 4.10<br>884<br>E-<br>05 | 1.06<br>09E<br>-05      |
| ASV_17320                                          | 0.00<br>031<br>892<br>8 | 8.23<br>469<br>E-<br>05 | CCM19a_sp.                                            | 0.00<br>016<br>687<br>5 | 4.30<br>859<br>E-<br>05 | Pedospaeraceae_Ellin517_ uncultured_bacterium       | 0.00<br>018<br>291<br>1 | 4.72<br>274<br>E-<br>05 | Candidatus_Kerfeldbacteria_metagenome          | 0.00<br>017<br>438<br>8 | 4.50<br>268<br>E-<br>05 | Anaerolineaceae_ uncultured_delta             | 0 | 0 | Caldilineaceae_ uncultured_sp.                           | 4.10<br>884<br>E-<br>05 | 1.06<br>09E<br>-05      |
| Blautila_metagenome                                | 0.00<br>031<br>892<br>8 | 8.23<br>469<br>E-<br>05 | Saccharimonadales_metagenome                          | 0.00<br>016<br>687<br>5 | 4.30<br>859<br>E-<br>05 | Pyramidobacter_piscolens                            | 0.00<br>018<br>291<br>1 | 4.72<br>274<br>E-<br>05 | Chloroplast_Pseudopediastrium_bonyanum         | 0.00<br>017<br>438<br>8 | 4.50<br>268<br>E-<br>05 | Anaerolineaceae_ uncultured_eubacterium       | 0 | 0 | Daphnobaculum_ uncultured_bacterium                      | 4.10<br>884<br>E-<br>05 | 1.06<br>09E<br>-05      |
| Candidatus_Pacebacteria_sp.                        | 0.00<br>031<br>892<br>8 | 8.23<br>469<br>E-<br>05 | ASV_4563                                              | 0.00<br>016<br>484<br>4 | 4.25<br>625<br>E-<br>05 | Oligoflexia_ uncultured_marine                      | 0.00<br>018<br>192<br>3 | 4.69<br>723<br>E-<br>05 | Gracilibacteria_ uncultured_bacterium          | 0.00<br>017<br>438<br>8 | 4.50<br>268<br>E-<br>05 | Anaerolineaceae_ uncultured_Longilinea        | 0 | 0 | Sphingobacteriales_A_KYH76/uncultured_Bacteroidetes      | 4.10<br>884<br>E-<br>05 | 1.06<br>09E<br>-05      |
| Erysipelotrichaceae_UCG-                           | 0.00<br>031<br>823      | 8.23<br>469<br>E-<br>05 | Saprosiraceae_ uncultured_bacterium                   | 0.00<br>016             | 4.25<br>625             | ShimazuellaShimazuella_sp.                          | 0.00<br>018             | 4.69<br>723             | Turicella_ uncultured_bacterium                | 0.00<br>017             | 4.50<br>268             | Anaerolineaceae_ uncultured_sludge            | 0 | 0 | ASV_18768                                                | 4.03<br>375             | 1.04<br>151             |

|                                                    |                         |                         |                                                    |                         |                         |                                                    |                         |                         |                                                     |                         |                         |                                                                   |   |   |                                                 |                         |                         |
|----------------------------------------------------|-------------------------|-------------------------|----------------------------------------------------|-------------------------|-------------------------|----------------------------------------------------|-------------------------|-------------------------|-----------------------------------------------------|-------------------------|-------------------------|-------------------------------------------------------------------|---|---|-------------------------------------------------|-------------------------|-------------------------|
| 009_uncultured_rumen                               | 892<br>8                | E-<br>05                |                                                    | 484<br>4                | E-<br>05                |                                                    | 192<br>3                | E-<br>05                |                                                     | 438<br>8                | E-<br>05                |                                                                   |   |   | E-<br>05                                        | E-<br>05                |                         |
| Leucobacter_sp.                                    | 0.00<br>031<br>892<br>8 | 8.23<br>469<br>E-<br>05 | Thermoleophilus_sp.                                | 0.00<br>016<br>484<br>4 | 4.25<br>625<br>E-<br>05 | ASV_11832                                          | 0.00<br>017<br>245<br>3 | 4.45<br>272<br>E-<br>05 | Babellales_uncultured_bacterium                     | 0.00<br>017<br>196<br>9 | 4.44<br>022<br>E-<br>05 | Anaerolineaceae_uncultured_toluene-degrading_methanogenic         | 0 |   | ASV_18771                                       | 4.03<br>375<br>E-<br>05 | 1.04<br>151<br>E-<br>05 |
| Atopostipes_uncultured_bacterium                   | 0.00<br>030<br>880<br>1 | 7.97<br>321<br>E-<br>05 | ASV_6710                                           | 0.00<br>015<br>991<br>5 | 4.12<br>899<br>E-<br>05 | Thermoplasmata_uncultured_sp.                      | 0.00<br>017<br>245<br>3 | 4.45<br>272<br>E-<br>05 | Beijerinckiaceae_sp.                                | 0.00<br>017<br>196<br>9 | 4.44<br>022<br>E-<br>05 | Anaerolineae_1-20_sp.                                             | 0 | 0 | ASV_18778                                       | 4.03<br>375<br>E-<br>05 | 1.04<br>151<br>E-<br>05 |
| Bacteroides_stercoris                              | 0.00<br>030<br>880<br>1 | 7.97<br>321<br>E-<br>05 | Ferruginibacter_sp.                                | 0.00<br>015<br>991<br>5 | 4.12<br>899<br>E-<br>05 | Candidatus_Saccharimonas                           | 0.00<br>016<br>840<br>2 | 3.19<br>398<br>E-<br>05 | Candidatus_SaccharimonasTM7_phyllum                 | 0.00<br>017<br>196<br>9 | 4.44<br>022<br>E-<br>05 | Anaerolineae_1-20uncultured_Chloroflexia                          | 0 | 0 | ASV_3544                                        | 4.03<br>375<br>E-<br>05 | 1.04<br>151<br>E-<br>05 |
| Cytophaga_uncultured_bacterium                     | 0.00<br>030<br>880<br>1 | 7.97<br>321<br>E-<br>05 | Gemmatimonadacea_uncultured_sp.                    | 0.00<br>015<br>991<br>5 | 4.12<br>899<br>E-<br>05 | Bulleidia_extracta                                 | 0.00<br>016<br>761<br>5 | 3.18<br>675<br>E-<br>05 | Clostridia_vadinBB60_group_uncultured_bacterium     | 0.00<br>017<br>196<br>9 | 4.44<br>022<br>E-<br>05 | Anaerolineae_A4b_metagene                                         | 0 | 0 | Sandaracinaeae_sp.                              | 4.03<br>375<br>E-<br>05 | 1.04<br>151<br>E-<br>05 |
| Lactobacillus_sp.                                  | 0.00<br>030<br>880<br>1 | 7.97<br>321<br>E-<br>05 | Lachnospiraceae_uncultured_metallophagum           | 0.00<br>015<br>991<br>5 | 4.12<br>899<br>E-<br>05 | Alloscardovia_omnicolens                           | 0.00<br>016<br>740<br>6 | 4.32<br>245<br>E-<br>05 | Gemmata_sp.                                         | 0.00<br>017<br>196<br>9 | 4.44<br>022<br>E-<br>05 | Anaerolineae_A4b_uncultured_bacterium                             | 0 | 0 | Stenotrophomonas_sp.                            | 4.03<br>375<br>E-<br>05 | 1.04<br>151<br>E-<br>05 |
| Saccharimonadales_uncultured_Epsilonproteobacteria | 0.00<br>030<br>880<br>1 | 7.97<br>321<br>E-<br>05 | Methanospirillum_sp.                               | 0.00<br>015<br>967<br>9 | 4.12<br>289<br>E-<br>05 | Clostridium_sensu_stricto_9_uncultured_bacterium   | 0.00<br>016<br>740<br>6 | 4.32<br>245<br>E-<br>05 | Methylomonadaceae_pLW-20_uncultured_bacterium       | 0.00<br>017<br>196<br>9 | 4.44<br>022<br>E-<br>05 | Anaerolineae_A4b_uncultured_soil                                  | 0 | 0 | Leeia_uncultured_bacterium                      | 3.87<br>414<br>E-<br>05 | 5.47<br>024<br>E-<br>06 |
| Turicella_uncultured_bacterium                     | 0.00<br>030<br>880<br>1 | 7.97<br>321<br>E-<br>05 | Microtrichaceae_uncultured_metallophagum           | 0.00<br>015<br>967<br>9 | 4.12<br>289<br>E-<br>05 | Gallionella_sp.                                    | 0.00<br>016<br>538<br>5 | 4.27<br>022<br>E-<br>05 | Microtrichiales_uncultured_wastewater_metallophagum | 0.00<br>017<br>196<br>9 | 4.44<br>022<br>E-<br>05 | Anaerolineae_A4b_sp.                                              | 0 | 0 | Actinomyces_sp.                                 | 3.78<br>181<br>E-<br>05 | 9.76<br>459<br>E-<br>06 |
| ASV_10605                                          | 0.00<br>030<br>726<br>7 | 7.93<br>36E<br>-05      | Prolixibacteraceae_uncultured_bacterium            | 0.00<br>015<br>967<br>9 | 4.12<br>289<br>E-<br>05 | MidBa8_uncultured_delta                            | 0.00<br>016<br>538<br>5 | 4.27<br>022<br>E-<br>05 | Beijerinckiaceae_uncultured_bacterium               | 0.00<br>016<br>520<br>1 | 4.26<br>547<br>E-<br>05 | Anaerolineae_A4b_wastewater_metallophagum                         | 0 | 0 | ASV_21095                                       | 3.78<br>181<br>E-<br>05 | 9.76<br>459<br>E-<br>06 |
| Saccharimonadales_metallophagum_contaminated_soil  | 0.00<br>030<br>726<br>7 | 7.93<br>36E<br>-05      | Fimbriimonadaceae_sp.                              | 0.00<br>014<br>583<br>6 | 3.76<br>547<br>E-<br>05 | SAR324_clade(Marine_group_B)bacterium_enrichment   | 0.00<br>016<br>538<br>5 | 4.27<br>022<br>E-<br>05 | Sandaracinus_uncultured_bacterium                   | 0.00<br>016<br>520<br>1 | 4.26<br>547<br>E-<br>05 | Anaerolineae_sp.                                                  | 0 | 0 | Desulfobacterium_catodophilum_group_sp.         | 3.78<br>181<br>E-<br>05 | 9.76<br>459<br>E-<br>06 |
| Cytophagaceae_uncultured_bacterium                 | 0.00<br>029<br>751<br>9 | 7.68<br>191<br>E-<br>05 | Facklamia_uncultured_bacterium                     | 0.00<br>014<br>193<br>7 | 3.66<br>48E<br>-05      | Aggregatibacter_sp.                                | 0.00<br>016<br>166<br>3 | 4.17<br>412<br>E-<br>05 | ASV_2510                                            | 0.00<br>016<br>137<br>1 | 3.05<br>544<br>E-<br>05 | Anaerolineae_uncultured_bacterium                                 | 0 | 0 | Pirellulacultured_organism                      | 3.78<br>181<br>E-<br>05 | 9.76<br>459<br>E-<br>06 |
| Lentimicrobiaceae_uncultured_Cytophagales          | 0.00<br>029<br>751<br>9 | 7.68<br>191<br>E-<br>05 | Uruburuella_sp.                                    | 0.00<br>014<br>193<br>7 | 3.66<br>48E<br>-05      | Beutenbergiaceae_sp.                               | 0.00<br>016<br>004<br>8 | 4.13<br>242<br>E-<br>05 | Candidatus_Nomuraibacteria                          | 0.00<br>016<br>070<br>7 | 4.14<br>944<br>E-<br>05 | Anaeromusa-Anaerococcus_sp.                                       | 0 | 0 | Acholeplasmauncultured_Acholeplasmataceae       | 3.68<br>641<br>E-<br>05 | 9.51<br>827<br>E-<br>06 |
| Ruminococcus_lactaris                              | 0.00<br>029<br>751<br>9 | 7.68<br>191<br>E-<br>05 | Bacteroides_sp.                                    | 0.00<br>013<br>898<br>5 | 3.58<br>858<br>E-<br>05 | C2U_uncultured_bacterium                           | 0.00<br>016<br>004<br>8 | 4.13<br>242<br>E-<br>05 | Pirellula_uncultured_bacterium                      | 0.00<br>016<br>070<br>7 | 4.14<br>944<br>E-<br>05 | Anaeromyxobacter_dehalogenans                                     | 0 | 0 | Candidatus_Woykeibacteria_uncultured_bacterium  | 3.68<br>641<br>E-<br>05 | 9.51<br>827<br>E-<br>06 |
| Ahniella_metallophagum                             | 0.00<br>029<br>708<br>9 | 7.67<br>08E<br>-05      | Candidatus_Peribacterium_uncultured_bacterium      | 0.00<br>013<br>898<br>5 | 3.58<br>858<br>E-<br>05 | Parcubacteria_GWA2-38-13b_uncultured_bacterium     | 0.00<br>016<br>004<br>8 | 4.13<br>242<br>E-<br>05 | Spirochaetaceae_uncultured_sp.                      | 0.00<br>015<br>978<br>8 | 4.12<br>571<br>E-<br>05 | Anaeromyxobacter_uncultured_bacterium                             | 0 | 0 | lamia_sp.                                       | 3.68<br>641<br>E-<br>05 | 9.51<br>827<br>E-<br>06 |
| Rhodospirillales_uncultured_uncultured_soil        | 0.00<br>029<br>708<br>9 | 7.67<br>08E<br>-05      | Dyella_sp.                                         | 0.00<br>013<br>898<br>5 | 3.58<br>858<br>E-<br>05 | Taibaiellauncultured_Sphingobacteria               | 0.00<br>016<br>004<br>8 | 4.13<br>242<br>E-<br>05 | Candidatus_Lloydibacteria                           | 0.00<br>015<br>463<br>1 | 3.99<br>256<br>E-<br>05 | Anaerorhabdus_fuscosa_group_uncultured_bacterium                  | 0 | 0 | Novosphingobium_uncultured_eubacterium          | 3.68<br>641<br>E-<br>05 | 9.51<br>827<br>E-<br>06 |
| Saccharimonadales_oil_bacterium                    | 0.00<br>029<br>708<br>9 | 7.67<br>08E<br>-05      | Eggerthellaceae_uncultured_bacterium               | 0.00<br>013<br>898<br>5 | 3.58<br>858<br>E-<br>05 | ASV_14332                                          | 0.00<br>015<br>79<br>9  | 4.07<br>696<br>E-<br>05 | Desulfobacterota_uncultured_Desulfuromonadales      | 0.00<br>015<br>463<br>1 | 3.99<br>256<br>E-<br>05 | Anaerოსinus_uncultured_bacterium                                  | 0 | 0 | Steroidobacteraceae_uncultured_sp.              | 3.68<br>641<br>E-<br>05 | 9.51<br>827<br>E-<br>06 |
| Vicinamibacteria_uncultured_metallophagum          | 0.00<br>029<br>708<br>9 | 7.67<br>08E<br>-05      | Ilumatobacteraceae_sp.                             | 0.00<br>013<br>898<br>5 | 3.58<br>858<br>E-<br>05 | PHOS-HE36_metallophagum                            | 0.00<br>015<br>79<br>9  | 4.07<br>696<br>E-<br>05 | Mucinivorans_hirudinis                              | 0.00<br>015<br>463<br>1 | 3.99<br>256<br>E-<br>05 | Anaerostipes_sp.                                                  | 0 | 0 | Thermicanus_uncultured_bacterium                | 3.68<br>641<br>E-<br>05 | 9.51<br>827<br>E-<br>06 |
| ASV_16316                                          | 0.00<br>029<br>617<br>1 | 7.64<br>71E<br>-05      | Pedospiraceae_A_Durb_Bin063-1_uncultured_bacterium | 0.00<br>013<br>713<br>3 | 3.54<br>076<br>E-<br>05 | Actinobacteriota_MB-A2-108_uncultured_bacterium    | 0.00<br>015<br>739<br>6 | 4.06<br>395<br>E-<br>05 | Oligoflexia_0319-6G20_sp.                           | 0.00<br>015<br>463<br>1 | 3.99<br>256<br>E-<br>05 | Anaeroflignum_lactatifermentans                                   | 0 | 0 | ASV_2390                                        | 3.66<br>211<br>E-<br>05 | 9.45<br>553<br>E-<br>06 |
| Lysinibacillus_sp.                                 | 0.00<br>029<br>617<br>1 | 7.64<br>71E<br>-05      | Thiothrix_uncultured_bacterium                     | 0.00<br>013<br>713<br>3 | 3.54<br>076<br>E-<br>05 | ASV_18676                                          | 0.00<br>015<br>739<br>6 | 4.06<br>395<br>E-<br>05 | Parcubacteria_uncultured_Parcubacteria              | 0.00<br>015<br>463<br>1 | 3.99<br>256<br>E-<br>05 | Anaerovibrio_sp.                                                  | 0 | 0 | Candidatus_Ovatusbacterium_uncultured_bacterium | 3.66<br>211<br>E-<br>05 | 9.45<br>553<br>E-<br>06 |
| ASV_3639                                           | 0.00<br>029<br>377<br>2 | 7.58<br>51E<br>-05      | ASV_21883                                          | 0.00<br>012<br>980<br>3 | 3.35<br>15E<br>-05      | Candidatus_Brennerbacteria_Parcubacteria_group     | 0.00<br>015<br>739<br>6 | 4.06<br>395<br>E-<br>05 | Dehalococcoidia_sp.                                 | 0.00<br>015<br>241<br>1 | 3.93<br>524<br>E-<br>05 | Anaerovoracaceae_Family_XIII_AD3011_group_sp.                     | 0 | 0 | Leptotrichiaceae_uncultured_bacterium           | 3.66<br>211<br>E-<br>05 | 9.45<br>553<br>E-<br>06 |
| Candidatus_Protoclimacium_sp.                      | 0.00<br>029<br>377<br>2 | 7.58<br>51E<br>-05      | Absconditabacteriales_(SR1)_metallophagum          | 0.00<br>012<br>833<br>7 | 3.31<br>365<br>E-<br>05 | Gastranaerophilales_sp.                            | 0.00<br>015<br>739<br>6 | 4.06<br>395<br>E-<br>05 | Saccharimonadales_uncultured_Chloroflexia           | 0.00<br>015<br>241<br>1 | 3.93<br>524<br>E-<br>05 | Anaerovoracaceae_Family_XIII_AD3011_group_uncultured_bacterium    | 0 | 0 | Methylotenera_uncultured_bacterium              | 3.66<br>211<br>E-<br>05 | 9.45<br>553<br>E-<br>06 |
| Devosia_sp.                                        | 0.00<br>029<br>377<br>2 | 7.58<br>51E<br>-05      | Atopobium_uncultured_rumen                         | 0.00<br>012<br>833<br>7 | 3.31<br>365<br>E-<br>05 | Gottschalkia_acidurici                             | 0.00<br>015<br>739<br>6 | 4.06<br>395<br>E-<br>05 | Abditibacterium_sp.                                 | 0.00<br>014<br>933<br>2 | 3.85<br>574<br>E-<br>05 | Anaerovoracaceae_Family_XIII_AD3011_group_uncultured_rumen        | 0 | 0 | Selenomonadaceae_sp.                            | 3.66<br>211<br>E-<br>05 | 9.45<br>553<br>E-<br>06 |
| Elioraea_sp.                                       | 0.00<br>029<br>377<br>2 | 7.58<br>51E<br>-05      | Fibrobacter_sp.                                    | 0.00<br>012<br>833<br>7 | 3.31<br>365<br>E-<br>05 | Ilumatobacteraceae_uncultured_bacterium            | 0.00<br>015<br>739<br>6 | 4.06<br>395<br>E-<br>05 | Alcaligenes_sp.                                     | 0.00<br>014<br>933<br>2 | 3.85<br>574<br>E-<br>05 | Anaerovoracaceae_Family_XIII_AD3011_groupuncultured_Clostridiales | 0 | 0 | Aquihabits_daechungensis                        | 3.42<br>015<br>E-<br>05 | 8.83<br>079<br>E-<br>06 |
| Holosporaceae_uncultured_bacterium                 | 0.00<br>029<br>377<br>2 | 7.58<br>51E<br>-05      | Saccharimonadaceae_sp.                             | 0.00<br>012<br>833<br>7 | 3.31<br>365<br>E-<br>05 | Rubinisphaeraceae_S_H_PL14_uncultured_plantomycete | 0.00<br>015<br>739<br>6 | 4.06<br>395<br>E-<br>05 | Aquaspirillum_putridi_conchylum                     | 0.00<br>014<br>933<br>2 | 3.85<br>574<br>E-<br>05 | Anaerovoracaceae_Family_XIII_UCG-002_sp.                          | 0 | 0 | Oligoflexia_uncultured_bacterium                | 3.42<br>015<br>E-<br>05 | 8.83<br>079<br>E-<br>06 |
| Methylacidiphilaceae_uncultured_bacterium          | 0.00<br>029<br>377<br>2 | 7.58<br>51E<br>-05      | Sphingomonadaceae_uncultured_sp.                   | 0.00<br>012<br>833<br>7 | 3.31<br>365<br>E-<br>05 | ASV_2303                                           | 0.00<br>015<br>739<br>6 | 2.88<br>938<br>E-<br>05 | Bauldia_uncultured_bacterium                        | 0.00<br>014<br>933<br>2 | 3.85<br>574<br>E-<br>05 | Anaerovoracaceae_Family_XIII_UCG-003_sp.                          | 0 | 0 | Methylophaga_sp.                                | 3.39<br>195<br>E-<br>05 | 8.75<br>798<br>E-<br>06 |
| Micropepsaceae_uncultured_sp.                      | 0.00<br>029<br>377<br>2 | 7.58<br>51E<br>-05      | Anaerostipes_sp.                                   | 0.00<br>012<br>419<br>5 | 3.20<br>67E<br>-05      | ASV_20352                                          | 0.00<br>015<br>900<br>9 | 3.87<br>322<br>E-<br>05 | Weeksella_sp.                                       | 0.00<br>013<br>820<br>9 | 3.56<br>854<br>E-<br>05 | Anaerovorax_sp.                                                   | 0 | 0 | Porphyromonas_pasteurii                         | 3.39<br>195<br>E-<br>05 | 8.75<br>798<br>E-<br>06 |
| Nocardiodetes_dilutus                              | 0.00<br>029<br>377<br>2 | 7.58<br>51E<br>-05      | Candidatus_Kaiserbacteriumuncultured_prokaryote    | 0.00<br>012<br>419<br>5 | 3.20<br>67E<br>-05      | Flavobacterium_hauense                             | 0.00<br>015<br>900<br>9 | 3.87<br>322<br>E-<br>05 | ASV_17593                                           | 0.00<br>013<br>696<br>1 | 3.53<br>632<br>E-<br>05 | Anaerovorax_uncultured_bacterium                                  | 0 | 0 | ASV_2910                                        | 3.25<br>246<br>E-<br>05 | 8.39<br>782<br>E-<br>06 |
| Planctomycetota_BD7-11_uncultured_Planctomycetota  | 0.00<br>029<br>377<br>2 | 7.58<br>51E<br>-05      | Sandaracinorhabdus_sp.                             | 0.00<br>012<br>419<br>5 | 3.20<br>67E<br>-05      | Hirschia_uncultured_bacterium                      | 0.00<br>015<br>900<br>9 | 3.87<br>322<br>E-<br>05 | Thermoactinomyces_sp.                               | 0.00<br>013<br>696<br>1 | 3.53<br>632<br>E-<br>05 | Anaerovoraxuncultured_prokaryote                                  | 0 | 0 | ASV_5218                                        | 3.25<br>246<br>E-<br>05 | 8.39<br>782<br>E-<br>06 |
| Pseudarcicella_hirudinis                           | 0.00<br>029<br>377<br>2 | 7.58<br>51E<br>-05      | Pedospiraceae_uncultured_bacterium                 | 0.00<br>013<br>5<br>05  | 3.10<br>187<br>E-<br>05 | Lachnospiraceae_NK3A20_group_sp.                   | 0.00<br>015<br>900<br>9 | 3.87<br>322<br>E-<br>05 | Micavibrionales_uncultured_sludge                   | 0.00<br>013<br>547<br>6 | 3.49<br>798<br>E-<br>05 | Ancalmicrobium_sp.                                                | 0 | 0 | Chitinophagaceae_uncultured_metallophagum       | 3.23<br>551<br>E-<br>05 | 8.35<br>405<br>E-<br>06 |
| Butyrivibrio_sp.                                   | 0.00<br>029<br>371<br>5 | 7.58<br>369<br>E-<br>05 | Singulisphaera_rosea                               | 0.00<br>011<br>427<br>8 | 2.95<br>065<br>E-<br>05 | Paeniclostridium_sp.                               | 0.00<br>015<br>900<br>9 | 3.87<br>322<br>E-<br>05 | ASV_14196                                           | 0.00<br>012<br>438<br>8 | 3.21<br>168<br>E-<br>05 | Aneurinibacillus_uncultured_bacterium                             | 0 | 0 | Crinallium_SAG_22.89_sp.                        | 3.23<br>551<br>E-<br>05 | 8.35<br>405<br>E-<br>06 |
| Blastocatella_11-24_uncultured_Acidobacteriales    | 0.00<br>029<br>029<br>7 | 7.49<br>544<br>E-<br>05 | Candidatus_Jorgensenbacteria                       | 0.00<br>011<br>124<br>7 | 2.87<br>239<br>E-<br>05 | Patescibacteria_WWE3candidate_division             | 0.00<br>015<br>900<br>9 | 3.87<br>322<br>E-<br>05 | S0134_terrestrial_group_sp.                         | 0.00<br>012<br>438<br>8 | 3.21<br>168<br>E-<br>05 | Angustibacter_uncultured_bacterium                                | 0 | 0 | Noviherbaspirillum_sp.                          | 3.23<br>551<br>E-<br>05 | 8.35<br>405<br>E-<br>06 |

|                                                            |                         |                         |                                                    |                         |                         |                                                     |                         |                         |                                                     |                         |                         |                                      |   |   |                                                   |                         |                         |
|------------------------------------------------------------|-------------------------|-------------------------|----------------------------------------------------|-------------------------|-------------------------|-----------------------------------------------------|-------------------------|-------------------------|-----------------------------------------------------|-------------------------|-------------------------|--------------------------------------|---|---|---------------------------------------------------|-------------------------|-------------------------|
| Saprosiraceae_uncultured_soil                              | 0.00<br>029<br>029<br>7 | 7.49<br>544<br>E-<br>05 | Rheinheimera_sp.                                   | 0.00<br>011<br>124<br>7 | 2.87<br>239<br>E-<br>05 | Clostridia_vadinBB60_group_Clostridiales_bacterium  | 0.00<br>014<br>905<br>7 | 3.84<br>864<br>E-<br>05 | Prevotella_shahii                                   | 0.00<br>012<br>306<br>4 | 3.17<br>75E<br>-05      | Anoxybacillus_sp.                    | 0 | 0 | Rothia_sp.                                        | 3.23<br>551<br>E-<br>05 | 8.35<br>405<br>E-<br>06 |
| SB-5_metagenome                                            | 0.00<br>029<br>029<br>7 | 7.49<br>544<br>E-<br>05 | Facklamia_tabacinasalis                            | 0.00<br>010<br>989<br>6 | 2.83<br>75E<br>-05      | Aurantimicrobium_uncultured_bacterium               | 0.00<br>014<br>884<br>6 | 3.84<br>319<br>E-<br>05 | Blii41_sp.                                          | 0.00<br>011<br>854<br>2 | 3.06<br>074<br>E-<br>05 | Antarctic_bacterium                  | 0 | 0 | Saccharimonadalesuncultured_prokaryote            | 3.23<br>551<br>E-<br>05 | 8.35<br>405<br>E-<br>06 |
| Acholeplasma_uncultured_bacterium                          | 0.00<br>028<br>993<br>9 | 7.48<br>619<br>E-<br>05 | Alloprevotella_sp.                                 | 0.00<br>010<br>661      | 2.75<br>266<br>E-<br>05 | Williamwhitmaniaceae_uncultured_sp.                 | 0.00<br>014<br>884<br>6 | 3.84<br>319<br>E-<br>05 | Diplorickettsiaceae_uncultured_agricultural_soil    | 0.00<br>011<br>854<br>2 | 3.06<br>074<br>E-<br>05 | Antricoccus_suffuscus                | 0 | 0 | ASV_21176                                         | 0.00<br>003<br>174<br>2 | 8.19<br>575<br>E-<br>06 |
| Anaerolineaceae_uncultured_soil                            | 0.00<br>028<br>778      | 7.43<br>045<br>E-<br>05 | ASV_164                                            | 0.00<br>010<br>661      | 2.75<br>266<br>E-<br>05 | Corynebacterium_xerosis                             | 0.00<br>014<br>371<br>1 | 3.71<br>06E<br>-05      | Gemmatimonas_phototrophica                          | 0.00<br>011<br>854<br>2 | 3.06<br>074<br>E-<br>05 | Apibacter_sp.                        | 0 | 0 | Candidatus_Adlerbacteria                          | 0.00<br>003<br>174<br>2 | 8.19<br>575<br>E-<br>06 |
| Roseburia_sp.                                              | 0.00<br>028<br>778      | 7.43<br>045<br>E-<br>05 | Candidatus_Falkowbacteria_Parcubacteria            | 0.00<br>010<br>661      | 2.75<br>266<br>E-<br>05 | Acidimicrobia_uncultured_bacterium                  | 0.00<br>014<br>034<br>4 | 3.62<br>367<br>E-<br>05 | ASV_1837                                            | 0.00<br>011<br>625<br>9 | 3.00<br>179<br>E-<br>05 | Aquabacterium_sp.                    | 0 | 0 | Friedmanniella_sp.                                | 0.00<br>003<br>174<br>2 | 8.19<br>575<br>E-<br>06 |
| ASV_20940                                                  | 0.00<br>028<br>139<br>9 | 7.26<br>569<br>E-<br>05 | Parcubacteria_uncultured_soil                      | 0.00<br>010<br>661      | 2.75<br>266<br>E-<br>05 | ASV_20460                                           | 0.00<br>014<br>034<br>4 | 3.62<br>367<br>E-<br>05 | Clostridium_sensu_stricto_8_iron-reducing_bacterium | 0.00<br>011<br>413<br>4 | 2.94<br>693<br>E-<br>05 | Aquaspirillum_putridiconchylium      | 0 | 0 | Parcubacteria_bacterium                           | 0.00<br>003<br>174<br>2 | 8.19<br>575<br>E-<br>06 |
| Gammaproteobacteria_a_211ds20_sp.                          | 0.00<br>027<br>413<br>4 | 7.07<br>811<br>E-<br>05 | Alphaproteobacteria_uncultured_Alphaproteobacteria | 0.00<br>010<br>645<br>3 | 2.74<br>86E<br>-05      | Bifid19_metagenome                                  | 0.00<br>014<br>034<br>4 | 3.62<br>367<br>E-<br>05 | Rhodospirillales_uncultured_bacterium               | 0.00<br>011<br>413<br>4 | 2.94<br>693<br>E-<br>05 | Aquaspirillum_sp.                    | 0 | 0 | Alloprevotella_uncultured_Bacteroidales           | 3.16<br>827<br>E-<br>05 | 8.18<br>044<br>E-<br>06 |
| Chloroplast_Guillardia_theta                               | 0.00<br>027<br>138<br>9 | 6.48<br>518<br>E-<br>05 | ASV_16822                                          | 0.00<br>010<br>645<br>3 | 2.74<br>86E<br>-05      | Izemplosmatales_uncultured_bacterium                | 0.00<br>014<br>034<br>4 | 3.62<br>367<br>E-<br>05 | SHA-41_uncultured_bacterium                         | 0.00<br>011<br>413<br>4 | 2.94<br>693<br>E-<br>05 | Aquicella_metagenome                 | 0 | 0 | Hypsibius_dujardini                               | 3.16<br>827<br>E-<br>05 | 8.18<br>044<br>E-<br>06 |
| Desulfocapsaceae_uncultured_sp.                            | 0.00<br>026<br>577<br>4 | 6.86<br>226<br>E-<br>05 | BergeyellaBergeyella_sp.                           | 0.00<br>010<br>645<br>3 | 2.74<br>86E<br>-05      | Rickettsiella_uncultured_bacterium                  | 0.00<br>014<br>034<br>4 | 3.62<br>367<br>E-<br>05 | ASV_2820                                            | 0.00<br>011<br>199<br>9 | 2.89<br>18E<br>-05      | Aquicella_sp.                        | 0 | 0 | Planctomycetes_uncultured_sp.                     | 3.16<br>827<br>E-<br>05 | 8.18<br>044<br>E-<br>06 |
| Lachnospiraceae_NK3A20_group_uncultured_rumen              | 0.00<br>026<br>577<br>4 | 6.86<br>226<br>E-<br>05 | Gammaproteobacteria_R7C24_uncultured_soil          | 0.00<br>010<br>645<br>3 | 2.74<br>86E<br>-05      | Saccharimonadales_WWH38_uncultured_bacterium        | 0.00<br>014<br>034<br>4 | 3.62<br>367<br>E-<br>05 | ASV_3443                                            | 0.00<br>011<br>199<br>9 | 2.89<br>18E<br>-05      | Aquicella_uncultured_bacterium       | 0 | 0 | ASV_21123                                         | 3.08<br>163<br>E-<br>05 | 7.95<br>673<br>E-<br>06 |
| Microvira_sp.                                              | 0.00<br>026<br>577<br>4 | 6.86<br>226<br>E-<br>05 | Mitochondria_Eukaryota_sp.                         | 0.00<br>010<br>645<br>3 | 2.74<br>86E<br>-05      | Sulterellaceae_AAP99_uncultured_bacterium           | 0.00<br>014<br>034<br>4 | 3.62<br>367<br>E-<br>05 | Blii41_uncultured_delta                             | 0.00<br>011<br>199<br>9 | 2.89<br>18E<br>-05      | Aquicella_unidentified               | 0 | 0 | Eggerthellaceae_sp.                               | 3.08<br>163<br>E-<br>05 | 7.95<br>673<br>E-<br>06 |
| Sphingobacteriaceae_sp.                                    | 0.00<br>026<br>033      | 6.72<br>169<br>E-<br>05 | NB1_j_uncultured_bacterium                         | 0.00<br>010<br>645<br>3 | 2.74<br>86E<br>-05      | Anaerovoracaceae_Family_XIII_UCG-005Eubacterium_sp. | 0.00<br>013<br>950<br>5 | 3.62<br>2E-<br>05       | Margulisbacteria_microbial_mat                      | 0.00<br>011<br>199<br>9 | 2.89<br>18E<br>-05      | Aquihabitan_daechungensis            | 0 | 0 | Simkaniaceae_uncultured_metagenome                | 3.08<br>163<br>E-<br>05 | 7.95<br>673<br>E-<br>06 |
| ASV_8275                                                   | 0.00<br>025<br>455<br>3 | 6.57<br>253<br>E-<br>05 | Lachnospiraceae_sp.                                | 9.14<br>223<br>E-<br>05 | 2.36<br>051<br>E-<br>05 | Clostridium_sensu_stricto_10_uncultured_bacterium   | 0.00<br>013<br>950<br>5 | 3.62<br>2E-<br>05       | Margulisbacteria_uncultured_bacterium               | 0.00<br>011<br>199<br>9 | 2.89<br>18E<br>-05      | Aquisphaera_sp.                      | 0 | 0 | Flavobacterium                                    | 2.71<br>356<br>E-<br>05 | 7.00<br>638<br>E-<br>06 |
| Deinococcus_antarcticus                                    | 0.00<br>025<br>455<br>3 | 6.57<br>253<br>E-<br>05 | Catenulospira_sp.                                  | 8.87<br>107<br>E-<br>05 | 2.29<br>05E<br>-05      | Gastranaerophilales_uncultured_prokaryote           | 0.00<br>013<br>509<br>2 | 3.48<br>80E<br>-05      | Synechocystis_PCC-6803_uncultured_bacterium         | 0.00<br>011<br>199<br>9 | 2.89<br>18E<br>-05      | Aquisphaera_uncultured_bacterium     | 0 | 0 | Williamwhitmania_sp.                              | 2.71<br>356<br>E-<br>05 | 7.00<br>638<br>E-<br>06 |
| Pedimicrobium_uncultured_Hyphomicrobium                    | 0.00<br>025<br>455<br>3 | 6.57<br>253<br>E-<br>05 | Methylocystis_sp.                                  | 8.87<br>107<br>E-<br>05 | 2.29<br>05E<br>-05      | ASV_21460                                           | 0.00<br>013<br>367<br>2 | 3.45<br>14E<br>-05      | ASV_15165                                           | 0.00<br>011<br>066<br>7 | 2.85<br>483<br>E-<br>05 | Arachis_hypogaea                     | 0 | 0 | ASV_21838                                         | 2.52<br>121<br>E-<br>05 | 6.50<br>974<br>E-<br>06 |
| Rhizorhapis_uncultured_Alphaproteobacteria                 | 0.00<br>025<br>455<br>3 | 6.57<br>253<br>E-<br>05 | Rivicola_sp.                                       | 8.87<br>107<br>E-<br>05 | 2.29<br>05E<br>-05      | ASV_21461                                           | 0.00<br>013<br>367<br>2 | 3.45<br>14E<br>-05      | Cellvibrio_uncultured_Cellvibrio                    | 0.00<br>011<br>013<br>4 | 2.84<br>365<br>E-<br>05 | Arboricoccus_pini                    | 0 | 0 | Bacilli_RF39_sp.                                  | 2.52<br>121<br>E-<br>05 | 6.50<br>974<br>E-<br>06 |
| Amaricoccus_sp.                                            | 0.00<br>025<br>386<br>1 | 6.55<br>466<br>E-<br>05 | Alphaproteobacteria_uncultured_bacterium           | 8.85<br>578<br>E-<br>05 | 2.20<br>909<br>E-<br>05 | ASV_21463                                           | 0.00<br>013<br>367<br>2 | 3.45<br>14E<br>-05      | Gammaproteobacteria_R7C24_metagenome                | 0.00<br>011<br>013<br>4 | 2.84<br>365<br>E-<br>05 | Arcicella_rigui                      | 0 | 0 | Bdellovibrio_uncultured_proteobacterium           | 2.52<br>121<br>E-<br>05 | 6.50<br>974<br>E-<br>06 |
| Clostridia_UCG-014_uncultured_organism                     | 0.00<br>025<br>369<br>7 | 6.55<br>043<br>E-<br>05 | Microthricaceae_IMC_C26207_metagenome              | 8.85<br>578<br>E-<br>05 | 2.20<br>909<br>E-<br>05 | Corynebacterium_glutamicum                          | 0.00<br>013<br>367<br>2 | 3.45<br>14E<br>-05      | Magnetospirillum_sp.                                | 0.00<br>011<br>013<br>4 | 2.84<br>365<br>E-<br>05 | Arcicella_sp.                        | 0 | 0 | Candidatus_Falkowbacteria_metagenome              | 2.52<br>121<br>E-<br>05 | 6.50<br>974<br>E-<br>06 |
| Rhodferax_sp.                                              | 0.00<br>025<br>369<br>7 | 6.55<br>043<br>E-<br>05 | ASV_19339                                          | 7.09<br>685<br>E-<br>05 | 1.83<br>24E<br>-05      | Elusimicrobiota_Lineage_IV_uncultured_bacterium     | 0.00<br>013<br>367<br>2 | 3.45<br>14E<br>-05      | Porphyrobacter_sp.                                  | 0.00<br>011<br>013<br>4 | 2.84<br>365<br>E-<br>05 | Arcicella_uncultured_bacterium       | 0 | 0 | Diplorickettsiaceae_uncultured_metagenome         | 2.52<br>121<br>E-<br>05 | 6.50<br>974<br>E-<br>06 |
| ASV_7514                                                   | 0.00<br>025<br>180<br>8 | 6.50<br>165<br>E-<br>05 | Fluviicola_metagenome                              | 7.09<br>685<br>E-<br>05 | 1.83<br>24E<br>-05      | Hydrogenophilus_sp.                                 | 0.00<br>013<br>367<br>2 | 3.45<br>14E<br>-05      | Rhodocyclaceae_uncultured_sp.                       | 0.00<br>011<br>013<br>4 | 2.84<br>365<br>E-<br>05 | Arcobacter_cryaeophilus              | 0 | 0 | Emticicia_paludis                                 | 2.52<br>121<br>E-<br>05 | 6.50<br>974<br>E-<br>06 |
| Exiguobacterium_undae                                      | 0.00<br>025<br>180<br>8 | 6.50<br>165<br>E-<br>05 | Novispirillum_sp.                                  | 7.09<br>685<br>E-<br>05 | 1.83<br>24E<br>-05      | Ilumotobacteraceae_uncultured_Actinomycetales       | 0.00<br>013<br>367<br>2 | 3.45<br>14E<br>-05      | Serratia_sp.                                        | 0.00<br>010<br>717<br>1 | 2.76<br>714<br>E-<br>05 | Arcobacter_sp.                       | 0 | 0 | Microgenomatia_sp.                                | 2.52<br>121<br>E-<br>05 | 6.50<br>974<br>E-<br>06 |
| Peptostreptococcaeae_sp.                                   | 0.00<br>025<br>180<br>8 | 6.50<br>165<br>E-<br>05 | Aquicella_sp.                                      | 6.85<br>667<br>E-<br>05 | 1.77<br>038<br>E-<br>05 | Tundrisphaera_uncultured_bacterium                  | 0.00<br>013<br>367<br>2 | 3.45<br>14E<br>-05      | Patescibacteria_WW_E3_uncultured_bacterium          | 0.00<br>010<br>160<br>7 | 2.62<br>348<br>E-<br>05 | Arcobacteraceae_sp.                  | 0 | 0 | Patescibacteria_WW_E3uncultured_candidate         | 2.52<br>121<br>E-<br>05 | 6.50<br>974<br>E-<br>06 |
| Blastocatellaceae_JG1_0001001-H03uncultured_Acidobacterium | 0.00<br>024<br>600<br>2 | 6.35<br>174<br>E-<br>05 | Cryptosporangium_sp.                               | 6.85<br>667<br>E-<br>05 | 1.77<br>038<br>E-<br>05 | ASV_1071                                            | 0.00<br>013<br>245<br>9 | 3.42<br>008<br>E-<br>05 | Leptolinea_uncultured_soil                          | 9.67<br>466<br>E-<br>05 | 2.49<br>799<br>E-<br>05 | Arcobacteraceae_uncultured_sp.       | 0 | 0 | Planctomycetes_uncultured_planctomyces            | 2.52<br>121<br>E-<br>05 | 6.50<br>974<br>E-<br>06 |
| Candidatus_Beaieia_uncultured_bacterium                    | 0.00<br>024<br>600<br>2 | 6.35<br>174<br>E-<br>05 | Cyclobacteriaceae_uncultured_Aquiflexum_sp.        | 6.85<br>667<br>E-<br>05 | 1.77<br>038<br>E-<br>05 | Bacteroides_ovatus                                  | 0.00<br>013<br>245<br>9 | 3.42<br>008<br>E-<br>05 | Malikia_sp.                                         | 9.67<br>466<br>E-<br>05 | 2.49<br>799<br>E-<br>05 | Arcticbacter_sp.                     | 0 | 0 | SAR324_clade(Marine_group_B)_metagenome           | 2.52<br>121<br>E-<br>05 | 6.50<br>974<br>E-<br>06 |
| Candidatus_Zambryskibacteria                               | 0.00<br>024<br>600<br>2 | 6.35<br>174<br>E-<br>05 | Kapabacterialesuncultured_Bacteroidetes/Chlorobi   | 6.85<br>667<br>E-<br>05 | 1.77<br>038<br>E-<br>05 | Candidatus_Curtissbacteria_sp.                      | 0.00<br>013<br>245<br>9 | 3.42<br>008<br>E-<br>05 | Alloscardovia_omnicolens                            | 0.00<br>009<br>526<br>3 | 2.45<br>968<br>E-<br>05 | Arcticbacter_uncultured_bacterium    | 0 | 0 | ASV_4527                                          | 2.45<br>761<br>E-<br>05 | 6.34<br>552<br>E-<br>06 |
| Thermodesulfobionria_uncultured_Nitrosospiraceae           | 0.00<br>024<br>600<br>2 | 6.35<br>174<br>E-<br>05 | Prolixibacteraceae_WCHB1-32_sp.                    | 6.85<br>667<br>E-<br>05 | 1.77<br>038<br>E-<br>05 | Candidatus_Magasaniikbacteria_uncultured_bacterium  | 0.00<br>013<br>245<br>9 | 3.42<br>008<br>E-<br>05 | ASV_1161                                            | 9.17<br>785<br>E-<br>05 | 2.36<br>971<br>E-<br>05 | Arenicellaceae_uncultured_prokaryote | 0 | 0 | Eubacterium_siraum                                | 2.45<br>761<br>E-<br>05 | 6.34<br>552<br>E-<br>06 |
| ASV_19610                                                  | 0.00<br>023<br>767<br>1 | 6.13<br>664<br>E-<br>05 | ASV_7664                                           | 5.33<br>049<br>E-<br>05 | 1.37<br>633<br>E-<br>05 | Clostridium_magnum                                  | 0.00<br>013<br>245<br>9 | 3.42<br>008<br>E-<br>05 | ASV_13680                                           | 9.17<br>785<br>E-<br>05 | 2.36<br>971<br>E-<br>05 | Arenimonas_oryziterrae               | 0 | 0 | Thymallus_thymallus                               | 2.45<br>761<br>E-<br>05 | 6.34<br>552<br>E-<br>06 |
| Butyrivibrio_sp.                                           | 0.00<br>023<br>767<br>1 | 6.13<br>664<br>E-<br>05 | Antricoccus_suffuscus                              | 5.32<br>264<br>E-<br>05 | 1.37<br>43E<br>-05      | Weeksellaceae_sp.                                   | 0.00<br>013<br>245<br>9 | 3.42<br>008<br>E-<br>05 | ASV_3580                                            | 9.17<br>785<br>E-<br>05 | 2.36<br>971<br>E-<br>05 | Arenimonas_sp.                       | 0 | 0 | ASV_8590                                          | 0.00<br>002<br>456<br>1 | 6.34<br>162<br>E-<br>06 |
| Haliangium_uncultured_proteobacterium                      | 0.00<br>023<br>767<br>1 | 6.13<br>664<br>E-<br>05 | ASV_20551                                          | 5.32<br>264<br>E-<br>05 | 1.37<br>43E<br>-05      | Acidiphilium_uncultured_bacterium                   | 0.00<br>013<br>230<br>8 | 3.41<br>618<br>E-<br>05 | Aurantisolomonas_uncultured_bacterium               | 9.17<br>785<br>E-<br>05 | 2.36<br>971<br>E-<br>05 | Aridibacter_sp.                      | 0 | 0 | Absoconditabacteriales_(SR1)_uncultured_candidate | 2.44<br>141<br>E-<br>05 | 6.30<br>369<br>E-<br>06 |
| Kapabacterialesuncultured_Chlorobi                         | 0.00<br>023<br>767<br>1 | 6.13<br>664<br>E-<br>05 | ASV_20552                                          | 5.32<br>264<br>E-<br>05 | 1.37<br>43E<br>-05      | ASV_14583                                           | 0.00<br>013<br>230<br>8 | 3.41<br>618<br>E-<br>05 | Cellulomonas_sp.                                    | 9.17<br>785<br>E-<br>05 | 2.36<br>971<br>E-<br>05 | Armatimonadales_metagenome           | 0 | 0 | ASV_21925                                         | 2.44<br>141<br>E-<br>05 | 6.30<br>369<br>E-<br>06 |

|                                                           |                         |                         |                                                             |                         |                         |                                              |                         |                         |                                                           |                         |                         |                                           |   |   |                                                         |                         |                         |
|-----------------------------------------------------------|-------------------------|-------------------------|-------------------------------------------------------------|-------------------------|-------------------------|----------------------------------------------|-------------------------|-------------------------|-----------------------------------------------------------|-------------------------|-------------------------|-------------------------------------------|---|---|---------------------------------------------------------|-------------------------|-------------------------|
| Leptotrichiaceae_uncultured_metagenome                    | 0.00<br>023<br>767<br>1 | 6.13<br>664<br>E-<br>05 | Brevibacterium_sp.                                          | 5.32<br>264<br>E-<br>05 | 1.37<br>43E<br>-05      | Dinghuibacter_sp.                            | 0.00<br>013<br>230<br>8 | 3.41<br>618<br>E-<br>05 | Hermimonas_sp.                                            | 9.17<br>785<br>E-<br>05 | 2.36<br>971<br>E-<br>05 | Armatimonadales_uncultured_bacterium      | 0 | 0 | ASV_3639                                                | 2.44<br>141<br>E-<br>05 | 6.30<br>369<br>E-<br>06 |
| Lysinibacillus_uncultured_prokaryote                      | 0.00<br>023<br>767<br>1 | 6.13<br>664<br>E-<br>05 | Candidatus_Liptonbacteria_Parcubacteria_group               | 5.32<br>264<br>E-<br>05 | 1.37<br>43E<br>-05      | Endobacter_uncultured_bacterium              | 0.00<br>013<br>230<br>8 | 3.41<br>618<br>E-<br>05 | Elusimicrobiota_Lineage_llia_sp.                          | 9.13<br>075<br>E-<br>05 | 2.35<br>755<br>E-<br>05 | Armatimonadales_uncultured_Chloroflexi    | 0 | 0 | ASV_5871                                                | 2.42<br>225<br>E-<br>05 | 6.24<br>906<br>E-<br>06 |
| Spirosoma_lituiforme                                      | 0.00<br>023<br>767<br>1 | 6.13<br>664<br>E-<br>05 | Christensenellaceae_R-7_group_bacterium_AC2043              | 5.32<br>264<br>E-<br>05 | 1.37<br>43E<br>-05      | Prevotella_loeschii                          | 0.00<br>013<br>230<br>8 | 3.41<br>618<br>E-<br>05 | Flavobacterium_noncentrifugans                            | 9.13<br>075<br>E-<br>05 | 2.35<br>755<br>E-<br>05 | Armatimonadales_uncultured_eubacterium    | 0 | 0 | Blastocatella_11-24_uncultured_bacterium                | 2.42<br>225<br>E-<br>05 | 6.24<br>906<br>E-<br>06 |
| ASV_11306                                                 | 0.00<br>023<br>497<br>2 | 6.06<br>695<br>E-<br>05 | Fibrobacterales_sp.                                         | 5.32<br>264<br>E-<br>05 | 1.37<br>43E<br>-05      | Candidatus_Magasaniibacteria_uncultured_soil | 0.00<br>012<br>934      | 3.33<br>964<br>E-<br>05 | Rubellimicrobium_uncultured_bacterium                     | 9.13<br>075<br>E-<br>05 | 2.35<br>755<br>E-<br>05 | Armatimonadalesuncultured_Armatimonadetes | 0 | 0 | Candidatus_Staskawiczbacteria_uncultured_bacterium      | 2.42<br>225<br>E-<br>05 | 6.24<br>906<br>E-<br>06 |
| Nitrospina_P9X2b3_D02_sp.                                 | 0.00<br>023<br>497<br>2 | 6.06<br>695<br>E-<br>05 | Lentimicrobiaceae_uncultured_Sphingobacteriales             | 5.32<br>264<br>E-<br>05 | 1.37<br>43E<br>-05      | Granulicella_tundricola                      | 0.00<br>012<br>934      | 3.33<br>964<br>E-<br>05 | Antirococcus_suffusus                                     | 8.59<br>845<br>E-<br>05 | 2.22<br>011<br>E-<br>05 | Armatimonadia_sp.                         | 0 | 0 | Hyphomonadales_uncultured_bacterium                     | 2.42<br>225<br>E-<br>05 | 6.24<br>906<br>E-<br>06 |
| Rhizorhapis_uncultured_bacterium                          | 0.00<br>023<br>497<br>2 | 6.06<br>695<br>E-<br>05 | Segetibacter_uncultured_Bacteroidetes                       | 5.32<br>264<br>E-<br>05 | 1.37<br>43E<br>-05      | Rhizobiales_A0839_sp.                        | 0.00<br>012<br>738<br>3 | 3.28<br>901<br>E-<br>05 | Candidatus_Berkiella_uncultured_bacterium                 | 8.46<br>726<br>E-<br>05 | 2.18<br>624<br>E-<br>05 | Armatimonadota_uncultured_bacterium       | 0 | 0 | Rickettsiales_SM2D12uncultured_Hyphomicrobiaceae        | 2.42<br>225<br>E-<br>05 | 6.24<br>906<br>E-<br>06 |
| ASV_17573                                                 | 0.00<br>022<br>314      | 5.76<br>145<br>E-<br>05 | Sphingobacteriales_nu.OPS_17_uncultured_Bacteroidetes       | 5.32<br>264<br>E-<br>05 | 1.37<br>43E<br>-05      | Blastocatella_sp.                            | 0.00<br>012<br>591<br>7 | 3.25<br>116<br>E-<br>05 | Ruminococcus_biocirculans                                 | 8.46<br>726<br>E-<br>05 | 2.18<br>624<br>E-<br>05 | Armatimonadota_uncultured_metagenome      | 0 | 0 | Aurantisolimonas_metagenome                             | 2.11<br>613<br>E-<br>05 | 5.48<br>382<br>E-<br>06 |
| Actinobacteria_PeM15_uncultured_soil                      | 0.00<br>021<br>772<br>3 | 5.62<br>158<br>E-<br>05 | Candidatus_Metachlamydia                                    | 4.57<br>112<br>E-<br>05 | 1.18<br>026<br>E-<br>05 | Fusibacter_sp.                               | 0.00<br>012<br>591<br>7 | 3.25<br>116<br>E-<br>05 | Prevotella_micans                                         | 8.33<br>552<br>E-<br>05 | 2.15<br>222<br>E-<br>05 | Armatimonadota_uncultured_sp.             | 0 | 0 | Candidatus_Limnoluna_uncultured_bacterium               | 2.11<br>613<br>E-<br>05 | 5.46<br>382<br>E-<br>06 |
| Woesearchaeales_GW2011_GWC1_47_15_Candidatus_Paearechaota | 0.00<br>021<br>772<br>3 | 5.62<br>158<br>E-<br>05 | Clostridioides_sp.                                          | 4.57<br>112<br>E-<br>05 | 1.18<br>026<br>E-<br>05 | Porphyrobacter_mercurialis                   | 0.00<br>012<br>591<br>7 | 3.25<br>116<br>E-<br>05 | ASV_17471                                                 | 8.29<br>256<br>E-<br>05 | 2.14<br>113<br>E-<br>05 | Armatimonadota_uncultured_soil            | 0 | 0 | Pseudomonas_sp.                                         | 2.11<br>613<br>E-<br>05 | 5.46<br>382<br>E-<br>06 |
| Methylophilaceae_MM1_uncultured_bacterium                 | 0.00<br>021<br>745<br>4 | 5.61<br>464<br>E-<br>05 | Candidatus_Abawacabacteria                                  | 4.27<br>789<br>E-<br>05 | 1.10<br>455<br>E-<br>05 | ASV_3026                                     | 0.00<br>012<br>566<br>4 | 2.25<br>821<br>E-<br>05 | Burkholderiales_TRA3-20uncultured_beta                    | 8.29<br>256<br>E-<br>05 | 2.14<br>113<br>E-<br>05 | Armatimonas_sp.                           | 0 | 0 | Rubinisphaeraceae_SPH-PL14_uncultured_plantomycete      | 2.11<br>613<br>E-<br>05 | 5.46<br>382<br>E-<br>06 |
| Rickettsiaceae_uncultured_metagenome                      | 0.00<br>021<br>583<br>5 | 5.57<br>284<br>E-<br>05 | alphaproteobacteria_uncultured_bacterium                    | 3.54<br>843<br>E-<br>05 | 9.16<br>201<br>E-<br>06 | Deinococcus_aquaticus                        | 0.00<br>012<br>362<br>5 | 3.19<br>198<br>E-<br>05 | Curvibacter_sp.                                           | 8.29<br>256<br>E-<br>05 | 2.14<br>113<br>E-<br>05 | Armatimonas_uncultured_bacterium          | 0 | 0 | Candidatus_Woesebacteria_uncultured_bacterium           | 2.11<br>218<br>E-<br>05 | 5.45<br>363<br>E-<br>06 |
| Spirochaetota_MVP-15_sp.                                  | 0.00<br>021<br>583<br>5 | 5.57<br>284<br>E-<br>05 | Anoxybacillus_sp.                                           | 3.54<br>843<br>E-<br>05 | 9.16<br>201<br>E-<br>06 | Propionivibrio_sp.                           | 0.00<br>012<br>281<br>1 | 3.17<br>097<br>E-<br>05 | Pedomicrobium_metagenome                                  | 8.29<br>256<br>E-<br>05 | 2.14<br>113<br>E-<br>05 | Arsenicococcus_boldensis                  | 0 | 0 | Chitinophagales_uncultured_uncultured_Sphingobacteria   | 2.05<br>442<br>E-<br>05 | 5.30<br>449<br>E-<br>06 |
| Leptolinea_sp.                                            | 0.00<br>021<br>539<br>1 | 5.56<br>137<br>E-<br>05 | Candidatus_Kaiserbacteria_uncultured_bacterium              | 3.54<br>843<br>E-<br>05 | 9.16<br>201<br>E-<br>06 | DesulfovibrioDesulfovibrio_putealis          | 0.00<br>011<br>576<br>9 | 2.98<br>914<br>E-<br>05 | Propionibacter_sp.                                        | 7.96<br>294<br>E-<br>05 | 2.05<br>602<br>E-<br>05 | Arthrobacter_sp.                          | 0 | 0 | Clostridium_sp.                                         | 2.05<br>442<br>E-<br>05 | 5.30<br>449<br>E-<br>06 |
| Candidatus_Paearechaeta                                   | 0.00<br>021<br>447<br>7 | 5.53<br>777<br>E-<br>05 | Coprococcus_metagenome                                      | 3.54<br>843<br>E-<br>05 | 9.16<br>201<br>E-<br>06 | Marvinbryantia_sp.                           | 0.00<br>011<br>576<br>9 | 2.98<br>914<br>E-<br>05 | Chitinophagales_uncultured_bacterium                      | 7.73<br>156<br>E-<br>05 | 1.99<br>628<br>E-<br>05 | Aspergillus_nidulans                      | 0 | 0 | Fibrobacteraceae_possible_genus_04_uncultured_bacterium | 2.05<br>442<br>E-<br>05 | 5.30<br>449<br>E-<br>06 |
| Chitinophagaceae_uncultured_sp.                           | 0.00<br>021<br>447<br>7 | 5.53<br>777<br>E-<br>05 | Peredibacter_sp.                                            | 3.54<br>843<br>E-<br>05 | 9.16<br>201<br>E-<br>06 | Mitochondria_Eukaryota_sp.                   | 0.00<br>011<br>496<br>9 | 2.96<br>849<br>E-<br>05 | ASV_5832                                                  | 7.46<br>659<br>E-<br>05 | 1.92<br>787<br>E-<br>05 | Asticcocaulis_sp.                         | 0 | 0 | Formivibrio_uncultured_bacterium                        | 2.05<br>442<br>E-<br>05 | 5.30<br>449<br>E-<br>06 |
| Chthoniobacter_sp.                                        | 0.00<br>021<br>447<br>7 | 5.53<br>777<br>E-<br>05 | Polyangia_mle1-27uncultured_Polyangiaceae                   | 3.54<br>843<br>E-<br>05 | 9.16<br>201<br>E-<br>06 | Sphingorhabdus_uncultured_bacterium          | 0.00<br>011<br>496<br>9 | 2.96<br>849<br>E-<br>05 | Candidatus_Azambacteria_sp.                               | 7.46<br>659<br>E-<br>05 | 1.92<br>787<br>E-<br>05 | ASV_10003                                 | 0 | 0 | Gracilibacteria_sp.                                     | 2.05<br>442<br>E-<br>05 | 5.30<br>449<br>E-<br>06 |
| Fimbrimonadaceae_uncultured_Armatimonadetes               | 0.00<br>021<br>447<br>7 | 5.53<br>777<br>E-<br>05 | 009E01-B-SD-P15_uncultured_bacterium                        | 0                       | 0                       | Armatimonadota_uncultured_uncultured_soil    | 0.00<br>011<br>432      | 2.95<br>173<br>E-<br>05 | Fluvicola_uncultured_bacterium                            | 7.46<br>659<br>E-<br>05 | 1.92<br>787<br>E-<br>05 | ASV_10004                                 | 0 | 0 | Mitochondria_metagenome                                 | 2.05<br>442<br>E-<br>05 | 5.30<br>449<br>E-<br>06 |
| Lachnibacillus_uncultured_bacterium                       | 0.00<br>021<br>447<br>7 | 5.53<br>777<br>E-<br>05 | 1013-28-CG33_uncultured_soil                                | 0                       | 0                       | Clostridium_sensu_stricto_8_sp.              | 0.00<br>011<br>432      | 2.95<br>173<br>E-<br>05 | Lewinella_uncultured_bacterium                            | 7.46<br>659<br>E-<br>05 | 1.92<br>787<br>E-<br>05 | ASV_10035                                 | 0 | 0 | Oligoflexia_uncultured_sp.                              | 2.05<br>442<br>E-<br>05 | 5.30<br>449<br>E-<br>06 |
| SAR324_clade(Marine_group_B)_uncultured_bacterium         | 0.00<br>021<br>447<br>7 | 5.53<br>777<br>E-<br>05 | Abditibacterium_sp.                                         | 0                       | 0                       | Rhizobiaceae_sp.                             | 0.00<br>011<br>432      | 2.95<br>173<br>E-<br>05 | Rubinisphaeraceae_SH-PL14_uncultured_bacterium            | 7.46<br>659<br>E-<br>05 | 1.92<br>787<br>E-<br>05 | ASV_10043                                 | 0 | 0 | Pirellula_sp.                                           | 2.05<br>442<br>E-<br>05 | 5.30<br>449<br>E-<br>06 |
| Thermomicrobium_uncultured_bacterium                      | 0.00<br>021<br>447<br>7 | 5.53<br>777<br>E-<br>05 | Absonditabacteriales_(SR1)_uncultured_bacterium             | 0                       | 0                       | Thermobacillus_uncultured_bacterium          | 0.00<br>011<br>432      | 2.95<br>173<br>E-<br>05 | Caulobacteraceae_PMMR1uncultured_endolithic               | 7.34<br>228<br>E-<br>05 | 1.89<br>577<br>E-<br>05 | ASV_10098                                 | 0 | 0 | Spirochaetaceae_uncultured_organism                     | 2.05<br>442<br>E-<br>05 | 5.30<br>449<br>E-<br>06 |
| Chloroflexi_OLB14_sp.                                     | 0.00<br>021<br>261<br>9 | 5.48<br>98E<br>-05      | Absonditabacteriales_(SR1)_candidate_division               | 0                       | 0                       | Clostridia_uncultured_Clostridiaceae         | 0.00<br>011<br>250<br>7 | 2.90<br>492<br>E-<br>05 | Gemmataceae_sp.                                           | 7.34<br>228<br>E-<br>05 | 1.89<br>577<br>E-<br>05 | ASV_10170                                 | 0 | 0 | ASV_3580                                                | 1.71<br>007<br>E-<br>05 | 4.41<br>538<br>E-<br>06 |
| Duganella_sp.                                             | 0.00<br>021<br>261<br>9 | 5.48<br>98E<br>-05      | Absonditabacteriales_(SR1)_sp.                              | 0                       | 0                       | Diploricettsia_uncultured_bacterium          | 0.00<br>011<br>250<br>7 | 2.90<br>492<br>E-<br>05 | Rickettsiales_SM2D12uncultured_Alphaproteobacteria        | 7.34<br>228<br>E-<br>05 | 1.89<br>577<br>E-<br>05 | ASV_10179                                 | 0 | 0 | Clostridium_sensu_stricto_1_metagenome                  | 1.61<br>776<br>E-<br>05 | 4.17<br>704<br>E-<br>06 |
| ASV_18750                                                 | 0.00<br>021<br>155<br>1 | 5.46<br>222<br>E-<br>05 | Absonditabacteriales_(SR1)_SR1_bacterium                    | 0                       | 0                       | Oligoflexales_uncultured_uncultured_soil     | 0.00<br>011<br>250<br>7 | 2.90<br>492<br>E-<br>05 | Pseudopropionibacterium_uncultured_bacterium              | 7.14<br>473<br>E-<br>05 | 1.84<br>476<br>E-<br>05 | ASV_1021                                  | 0 | 0 | Capnocytophaga_sp.                                      | 0.00<br>001<br>613<br>5 | 4.16<br>604<br>E-<br>06 |
| C39_sp.                                                   | 0.00<br>021<br>155<br>1 | 5.46<br>222<br>E-<br>05 | Absonditabacteriales_(SR1)_uncultured_candidate             | 0                       | 0                       | Microbacteriaceae_sp.                        | 0.00<br>011<br>160<br>4 | 2.88<br>16E<br>-05      | Agromyces_sp.                                             | 6.91<br>047<br>E-<br>05 | 1.78<br>428<br>E-<br>05 | ASV_10253                                 | 0 | 0 | SBR1031_uncultured_Gemmatimonadetes                     | 0.00<br>001<br>613<br>5 | 4.16<br>604<br>E-<br>06 |
| Dermacoccus_sp.                                           | 0.00<br>021<br>155<br>1 | 5.46<br>222<br>E-<br>05 | Absonditabacteriales_(SR1)_uncultured_Epsilonproteobacteria | 0                       | 0                       | ASV_17662                                    | 0.00<br>010<br>526<br>7 | 2.71<br>798<br>E-<br>05 | ASV_18698                                                 | 6.91<br>047<br>E-<br>05 | 1.78<br>428<br>E-<br>05 | ASV_10292                                 | 0 | 0 | Subdoligranulum_sp.                                     | 0.00<br>001<br>613<br>5 | 4.16<br>604<br>E-<br>06 |
| Oligella_urethralis                                       | 0.00<br>021<br>155<br>1 | 5.46<br>222<br>E-<br>05 | Absonditabacteriales_(SR1)_uncultured_organism              | 0                       | 0                       | SediminipirochaetaS_pirochaeta_sp.           | 0.00<br>010<br>369<br>2 | 2.67<br>732<br>E-<br>05 | Fimbrigiobus_sp.                                          | 6.91<br>047<br>E-<br>05 | 1.78<br>428<br>E-<br>05 | ASV_10316                                 | 0 | 0 | Acinetobacter_sp.                                       | 1.35<br>678<br>E-<br>05 | 3.50<br>319<br>E-<br>06 |
| Oscillospiraceae_UCG-005uncultured_prokaryote             | 0.00<br>021<br>155<br>1 | 5.46<br>222<br>E-<br>05 | Absonditabacteriales_(SR1)_uncultured_prokaryote            | 0                       | 0                       | Pedosphaeraceae_metagenome                   | 0.00<br>010<br>059<br>8 | 2.59<br>743<br>E-<br>05 | Paludibaculum_metagenome                                  | 6.91<br>047<br>E-<br>05 | 1.78<br>428<br>E-<br>05 | ASV_10346                                 | 0 | 0 | Proteobacteria_sp.                                      | 1.35<br>678<br>E-<br>05 | 3.50<br>319<br>E-<br>06 |
| Polyangia_mle1-27_metagenome                              | 0.00<br>021<br>155<br>1 | 5.46<br>222<br>E-<br>05 | ABY1_sp.                                                    | 0                       | 0                       | Phreatobacter_uncultured_Rhizobiales         | 0.00<br>010<br>059<br>8 | 2.59<br>743<br>E-<br>05 | Absonditabacteriales_(SR1)_sp.                            | 6.84<br>806<br>E-<br>05 | 1.76<br>816<br>E-<br>05 | ASV_10385                                 | 0 | 0 | Prevotella_baroniae                                     | 6.78<br>389<br>E-<br>06 | 1.75<br>159<br>E-<br>06 |
| Salinicoccus_albus                                        | 0.00<br>021<br>155<br>1 | 5.46<br>222<br>E-<br>05 | Acanthopleuribacterium_uncultured_bacterium                 | 0                       | 0                       | Ralstonia_sp.                                | 0.00<br>010<br>003<br>1 | 1.93<br>484<br>E-<br>05 | Actinobacteria_sp.                                        | 6.84<br>806<br>E-<br>05 | 1.76<br>816<br>E-<br>05 | ASV_10460                                 | 0 | 0 | 009E01-B-SD-P15_uncultured_bacterium                    | 0                       | 0                       |
| Sphingobacteriales_AKYH767_metagenome                     | 0.00<br>021<br>155<br>1 | 5.46<br>222<br>E-<br>05 | Acetitomaculum_uncultured_bacterium                         | 0                       | 0                       | Anaerolineae_A4b_sp.                         | 0.00<br>009<br>923<br>1 | 2.56<br>213<br>E-<br>05 | Flavobacteriales_NS9_marine_groupuncultured_Bacteroidetes | 6.84<br>806<br>E-<br>05 | 1.76<br>816<br>E-<br>05 | ASV_10537                                 | 0 | 0 | 1013-28-CG33_uncultured_soil                            | 0                       | 0                       |

|                                                    |                         |                         |                                                   |   |   |                                               |                         |                         |                                                       |                         |                         |           |   |   |                                                             |   |   |
|----------------------------------------------------|-------------------------|-------------------------|---------------------------------------------------|---|---|-----------------------------------------------|-------------------------|-------------------------|-------------------------------------------------------|-------------------------|-------------------------|-----------|---|---|-------------------------------------------------------------|---|---|
| Sporichthyaceae_hgcl_clade_Candidatus_Planktophila | 0.00<br>021<br>155<br>1 | 5.46<br>222<br>E-<br>05 | Acetitomaculum__uncultured_rumen                  | 0 | 0 | ASV_9544                                      | 0.00<br>009<br>923<br>1 | 2.56<br>213<br>E-<br>05 | Kiritimatiellae_WCHB1-41_uncultured_rumen             | 6.84<br>806<br>E-<br>05 | 1.76<br>816<br>E-<br>05 | ASV_10583 | 0 | 0 | Abditobacterium_sp.                                         | 0 | 0 |
| ASV_2249                                           | 0.00<br>020<br>750<br>3 | 4.02<br>756<br>E-<br>05 | Acetitomaculum_sp.                                | 0 | 0 | Cerebacter_sp.                                | 0.00<br>009<br>923<br>1 | 2.56<br>213<br>E-<br>05 | Luteolibacter_sp.                                     | 6.84<br>806<br>E-<br>05 | 1.76<br>816<br>E-<br>05 | ASV_10605 | 0 | 0 | Absonditabacteriales_(SR1)_metagenome                       | 0 | 0 |
| Azospirillum_uncultured_bacterium                  | 0.00<br>020<br>586<br>7 | 5.31<br>546<br>E-<br>05 | Acetivibrio_uncultured_bacterium                  | 0 | 0 | Chloroplast_groundwater__metagenome           | 0.00<br>009<br>923<br>1 | 2.56<br>213<br>E-<br>05 | Oligoflexia_0319-6G20_uncultured_Syntrophobacteraceae | 6.84<br>806<br>E-<br>05 | 1.76<br>816<br>E-<br>05 | ASV_10606 | 0 | 0 | Absonditabacteriales_(SR1)_uncultured_bacterium             | 0 | 0 |
| Frankiales_uncultured_actinobacterium              | 0.00<br>020<br>586<br>7 | 5.31<br>546<br>E-<br>05 | Acetoanaerobium_uncultured_bacterium              | 0 | 0 | Chloroplast_Hafniomonas_laavis                | 0.00<br>009<br>923<br>1 | 2.56<br>213<br>E-<br>05 | Parcubacteriaincultured_organism                      | 6.84<br>806<br>E-<br>05 | 1.76<br>816<br>E-<br>05 | ASV_10613 | 0 | 0 | Absonditabacteriales_(SR1)_candidata_division               | 0 | 0 |
| Polyangia_mle1-27uncultured_protobacterium         | 0.00<br>020<br>586<br>7 | 5.31<br>546<br>E-<br>05 | Acetobacter_sp.                                   | 0 | 0 | Dehalococcoidia_uncultured_Chloroflexi        | 0.00<br>009<br>923<br>1 | 2.56<br>213<br>E-<br>05 | Sporichthyaceae_hgcl_clade_sp.                        | 6.84<br>806<br>E-<br>05 | 1.76<br>816<br>E-<br>05 | ASV_10814 | 0 | 0 | Absonditabacteriales_(SR1)_sp.                              | 0 | 0 |
| Rhizobiales_Incertae_Sedis_uncultured_sp.          | 0.00<br>020<br>586<br>7 | 5.31<br>546<br>E-<br>05 | Acetobacteraceae_sp.                              | 0 | 0 | Edaphobaculum_metagenome                      | 0.00<br>009<br>923<br>1 | 2.56<br>213<br>E-<br>05 | ASV_19840                                             | 6.77<br>381<br>E-<br>05 | 1.74<br>899<br>E-<br>05 | ASV_10821 | 0 | 0 | Absonditabacteriales_(SR1)_SR1_bacterium                    | 0 | 0 |
| Tyzzerella_uncultured_clostridium                  | 0.00<br>020<br>586<br>7 | 5.31<br>546<br>E-<br>05 | Acetobacteraceae_uncultured_bacterium             | 0 | 0 | Nitrospira_defluvi                            | 0.00<br>009<br>923<br>1 | 2.56<br>213<br>E-<br>05 | FCPU426_uncultured_bacterium                          | 6.77<br>381<br>E-<br>05 | 1.74<br>899<br>E-<br>05 | ASV_10869 | 0 | 0 | Absonditabacteriales_(SR1)_uncultured_Epsilonproteobacteria | 0 | 0 |
| ASV_4909                                           | 0.00<br>020<br>083<br>9 | 3.53<br>469<br>E-<br>05 | Acetobacteraceae_uncultured__metagenome           | 0 | 0 | oc32_metagenome                               | 0.00<br>009<br>923<br>1 | 2.56<br>213<br>E-<br>05 | Thermomicrobiales_JG30-KF-CM45_uncultured_bacterium   | 6.77<br>381<br>E-<br>05 | 1.74<br>899<br>E-<br>05 | ASV_10995 | 0 | 0 | Absonditabacteriales_(SR1)_uncultured_organism              | 0 | 0 |
| Caulobacter_sp.                                    | 0.00<br>019<br>584<br>8 | 5.05<br>677<br>E-<br>05 | Acetobacteraceae_uncultured_sp.                   | 0 | 0 | Verrucomicrobiae_sp.                          | 0.00<br>009<br>923<br>1 | 2.56<br>213<br>E-<br>05 | Cutibacterium_granulosum                              | 5.81<br>294<br>E-<br>05 | 1.50<br>089<br>E-<br>05 | ASV_11002 | 0 | 0 | Absonditabacteriales_(SR1)_uncultured_prokaryote            | 0 | 0 |
| Opitutaceae_sp.                                    | 0.00<br>019<br>584<br>8 | 5.05<br>677<br>E-<br>05 | Acetobacterium_sp.                                | 0 | 0 | Empedobacter_brevis                           | 9.44<br>376<br>E-<br>05 | 2.43<br>837<br>E-<br>05 | ASV_20010                                             | 5.52<br>837<br>E-<br>05 | 1.42<br>742<br>E-<br>05 | ASV_11030 | 0 | 0 | ABY1_sp.                                                    | 0 | 0 |
| Rickettsiales_SM2D1_2_metagenome                   | 0.00<br>019<br>584<br>8 | 5.05<br>677<br>E-<br>05 | Acetothermia_uncultured_bacterium                 | 0 | 0 | SepB_3_uncultured_bacterium                   | 9.44<br>376<br>E-<br>05 | 2.43<br>837<br>E-<br>05 | Peptoclostridium_uncultured_organism                  | 5.52<br>837<br>E-<br>05 | 1.42<br>742<br>E-<br>05 | ASV_11102 | 0 | 0 | Acanthopleuribacterium_uncultured_bacterium                 | 0 | 0 |
| Schlesneria_uncultured_planctomycete               | 0.00<br>019<br>584<br>8 | 5.05<br>677<br>E-<br>05 | Acholeplasma_uncultured_bacterium                 | 0 | 0 | Aeromonas_uncultured_gamma                    | 9.35<br>629<br>E-<br>05 | 2.41<br>578<br>E-<br>05 | Ruminococcus_metagenome                               | 5.52<br>837<br>E-<br>05 | 1.42<br>742<br>E-<br>05 | ASV_11103 | 0 | 0 | Acetitomaculum_uncultured_bacterium                         | 0 | 0 |
| Enterovibrio_uncultured_bacterium                  | 0.00<br>019<br>581      | 5.05<br>579<br>E-<br>05 | Acholeplasma_axanthum                             | 0 | 0 | ASV_21484                                     | 9.35<br>629<br>E-<br>05 | 2.41<br>578<br>E-<br>05 | Coxiella_uncultured_Coxiellaceae                      | 5.50<br>671<br>E-<br>05 | 1.42<br>183<br>E-<br>05 | ASV_11163 | 0 | 0 | Acetitomaculum_uncultured_rumen                             | 0 | 0 |
| Gemmataceae_uncultured_Crater                      | 0.00<br>019<br>581      | 5.05<br>579<br>E-<br>05 | Acholeplasma_brassicae                            | 0 | 0 | ASV_21486                                     | 9.35<br>629<br>E-<br>05 | 2.41<br>578<br>E-<br>05 | Defluvitellaceae_UCG-011_uncultured_bacterium         | 5.50<br>671<br>E-<br>05 | 1.42<br>183<br>E-<br>05 | ASV_11164 | 0 | 0 | Acetivibrio_uncultured_bacterium                            | 0 | 0 |
| Luteolibacter_uncultured_bacterium                 | 0.00<br>019<br>581      | 5.05<br>579<br>E-<br>05 | Acholeplasma_morum                                | 0 | 0 | Haliangium_sp.                                | 9.35<br>629<br>E-<br>05 | 2.41<br>578<br>E-<br>05 | Gammaproteobacteria_EV818SWAP88_uncultured_bacterium  | 5.50<br>671<br>E-<br>05 | 1.42<br>183<br>E-<br>05 | ASV_11306 | 0 | 0 | Acetoanaerobium_uncultured_bacterium                        | 0 | 0 |
| Bdellovibrio_uncultured_Bdellovibrio               | 0.00<br>018<br>76       | 4.84<br>361<br>E-<br>05 | Acholeplasma_sp.                                  | 0 | 0 | Haliangium_uncultured_Myxococcales            | 9.35<br>629<br>E-<br>05 | 2.41<br>578<br>E-<br>05 | Neochlamydia_uncultured_bacterium                     | 5.50<br>671<br>E-<br>05 | 1.42<br>183<br>E-<br>05 | ASV_11362 | 0 | 0 | Acetobacter_sp.                                             | 0 | 0 |
| Patescibacteria_CPR2_uncultured_Firmicutes         | 0.00<br>018<br>76       | 4.84<br>381<br>E-<br>05 | Acholeplasmataceae_EMP-G18_uncultured_Molluscites | 0 | 0 | Nanoarchaeia_sp.                              | 9.35<br>629<br>E-<br>05 | 2.41<br>578<br>E-<br>05 | Phycisphaeraceae_SM1A02_sp.                           | 5.50<br>671<br>E-<br>05 | 1.42<br>183<br>E-<br>05 | ASV_11393 | 0 | 0 | Acetobacteraceae_sp.                                        | 0 | 0 |
| Planctopirus_metagenome                            | 0.00<br>018<br>76       | 4.84<br>381<br>E-<br>05 | Acholeplasmauncultured_Acholeplasmataceae         | 0 | 0 | Opitutus_metagenome                           | 9.35<br>629<br>E-<br>05 | 2.41<br>578<br>E-<br>05 | Afipia_sp.                                            | 5.08<br>035<br>E-<br>05 | 1.31<br>174<br>E-<br>05 | ASV_11399 | 0 | 0 | Acetobacteraceae_uncultured_bacterium                       | 0 | 0 |
| Aerococcaceae_sp.                                  | 0.00<br>018<br>595      | 4.80<br>121<br>E-<br>05 | Achromatium_sp.                                   | 0 | 0 | Afipia_genosp.                                | 9.14<br>557<br>E-<br>05 | 2.36<br>138<br>E-<br>05 | Geobacteraceae_uncultured_delta                       | 5.08<br>035<br>E-<br>05 | 1.31<br>174<br>E-<br>05 | ASV_11414 | 0 | 0 | Acetobacteraceae_uncultured__metagenome                     | 0 | 0 |
| Bacteroidetes_VC2.1_Bac22_metagenome               | 0.00<br>018<br>595      | 4.80<br>121<br>E-<br>05 | Acidaminobacter__uncultured_bacterium             | 0 | 0 | ASV_2692                                      | 9.14<br>557<br>E-<br>05 | 2.36<br>138<br>E-<br>05 | Rickettsiales_SM2D1_2_sp.                             | 5.08<br>035<br>E-<br>05 | 1.31<br>174<br>E-<br>05 | ASV_11446 | 0 | 0 | Acetobacteraceae_uncultured_sp.                             | 0 | 0 |
| Rubinisphaeraceae_uncultured_sp.                   | 0.00<br>018<br>595      | 4.80<br>121<br>E-<br>05 | Acidaminococcaceae_uncultured_bacterium           | 0 | 0 | ASV_3803                                      | 9.14<br>557<br>E-<br>05 | 2.36<br>138<br>E-<br>05 | Methylobacterium-Methyloburum_sp.                     | 4.76<br>315<br>E-<br>05 | 1.22<br>984<br>E-<br>05 | ASV_11492 | 0 | 0 | Acetobacterium_sp.                                          | 0 | 0 |
| Leptospiraceae_RBG-16-49-21_uncultured_bacterium   | 0.00<br>018<br>121<br>2 | 4.67<br>887<br>E-<br>05 | Acidibacter__metagenome                           | 0 | 0 | Caulobacteraceae_sp.                          | 9.14<br>557<br>E-<br>05 | 2.36<br>138<br>E-<br>05 | ASV_3436                                              | 4.56<br>538<br>E-<br>05 | 1.17<br>878<br>E-<br>05 | ASV_11530 | 0 | 0 | Acetothermia_uncultured_bacterium                           | 0 | 0 |
| eub62A3_uncultured_bacterium                       | 0.00<br>017<br>986<br>3 | 4.64<br>404<br>E-<br>05 | Acidibacter__uncultured_bacterium                 | 0 | 0 | Paenibacillus_sp.                             | 9.14<br>557<br>E-<br>05 | 2.36<br>138<br>E-<br>05 | ASV_5779                                              | 4.56<br>538<br>E-<br>05 | 1.17<br>878<br>E-<br>05 | ASV_11581 | 0 | 0 | Acholeplasma_uncultured_bacterium                           | 0 | 0 |
| Magnetospirillum_uncultured_bacterium              | 0.00<br>017<br>986<br>3 | 4.64<br>404<br>E-<br>05 | Acidibacter_sp.                                   | 0 | 0 | Pajarobacteriaincultured_prokaryote           | 9.14<br>557<br>E-<br>05 | 2.36<br>138<br>E-<br>05 | Caulobacter_metagenome                                | 4.56<br>538<br>E-<br>05 | 1.17<br>878<br>E-<br>05 | ASV_1161  | 0 | 0 | Acholeplasma_axanthum                                       | 0 | 0 |
| SR-FBR-L83_Ignavibacteria_bacterium                | 0.00<br>017<br>986<br>3 | 4.64<br>404<br>E-<br>05 | Acidimicrobia_IMCC26256_sp.                       | 0 | 0 | Rhizobiales_A0839__metagenome                 | 9.14<br>557<br>E-<br>05 | 2.36<br>138<br>E-<br>05 | Faecalibacterium_sp.                                  | 4.56<br>538<br>E-<br>05 | 1.17<br>878<br>E-<br>05 | ASV_11616 | 0 | 0 | Acholeplasma_laidlawii                                      | 0 | 0 |
| ASV_2390                                           | 0.00<br>017<br>825<br>3 | 4.60<br>247<br>E-<br>05 | Acidimicrobia_IMCC26256_uncultured_bacterium      | 0 | 0 | Acholeplasma_laidlawii                        | 8.77<br>224<br>E-<br>05 | 2.26<br>498<br>E-<br>05 | Fluviicola_uncultured_Fluviicola                      | 4.56<br>538<br>E-<br>05 | 1.17<br>878<br>E-<br>05 | ASV_11696 | 0 | 0 | Acholeplasma_morum                                          | 0 | 0 |
| ASV_5304                                           | 0.00<br>017<br>825<br>3 | 4.60<br>247<br>E-<br>05 | Acidimicrobia_IMCC26256_uncultured_soil           | 0 | 0 | Anaerovoraxuncultured_prokaryote              | 8.77<br>224<br>E-<br>05 | 2.26<br>498<br>E-<br>05 | Spirochaeta_2_metagenome                              | 4.56<br>538<br>E-<br>05 | 1.17<br>878<br>E-<br>05 | ASV_11732 | 0 | 0 | Acholeplasma_sp.                                            | 0 | 0 |
| Gammaproteobacteria_uncultured__metagenome         | 0.00<br>017<br>825<br>3 | 4.60<br>247<br>E-<br>05 | Acidimicrobia_IMCC26256uncultured_Aciditermonas   | 0 | 0 | ASV_18896                                     | 8.77<br>224<br>E-<br>05 | 2.26<br>498<br>E-<br>05 | Candidatus_Magasanikibacteria                         | 4.14<br>628<br>E-<br>05 | 1.07<br>056<br>E-<br>05 | ASV_11789 | 0 | 0 | Acholeplasmataceae_EMP-G18_uncultured_Molluscites           | 0 | 0 |
| Polyangia_mle1-27_sp.                              | 0.00<br>017<br>825<br>3 | 4.60<br>247<br>E-<br>05 | Acidimicrobia_IMCC26256uncultured_actinobacterium | 0 | 0 | Azospirillum_sp.                              | 8.77<br>224<br>E-<br>05 | 2.26<br>498<br>E-<br>05 | Mucilaginibacter_sp.                                  | 4.14<br>628<br>E-<br>05 | 1.07<br>056<br>E-<br>05 | ASV_11832 | 0 | 0 | Achromatium_sp.                                             | 0 | 0 |
| SB-5_sp.                                           | 0.00<br>017<br>825<br>3 | 4.60<br>247<br>E-<br>05 | Acidimicrobia_IMCC26256uncultured_Actinomycetales | 0 | 0 | Diploickettsiaceae_uncultured_proteobacterium | 8.77<br>224<br>E-<br>05 | 2.26<br>498<br>E-<br>05 | Nitrospira_japonica                                   | 4.14<br>628<br>E-<br>05 | 1.07<br>056<br>E-<br>05 | ASV_12032 | 0 | 0 | Acidaminobacter__uncultured_bacterium                       | 0 | 0 |





|                                                      |                         |                         |                                                     |   |   |                                                         |                         |                         |                                                              |                         |                         |           |   |   |                                                          |   |   |
|------------------------------------------------------|-------------------------|-------------------------|-----------------------------------------------------|---|---|---------------------------------------------------------|-------------------------|-------------------------|--------------------------------------------------------------|-------------------------|-------------------------|-----------|---|---|----------------------------------------------------------|---|---|
| Hydrogenophilaceae_uncultured_sp.                    | 0.00<br>012<br>693      | 3.27<br>732<br>E-<br>05 | Actinobacteria_PeM1<br>5_sp.                        | 0 | 0 | Pir4_lineage_uncultured_Plantomycetaceae                | 7.01<br>779<br>E-<br>05 | 1.81<br>199<br>E-<br>05 | Anaerococcusuncultured_organism                              | 1.44<br>781<br>E-<br>05 | 3.73<br>823<br>E-<br>06 | ASV_13391 | 0 | 0 | Acremonium_fuci                                          | 0 | 0 |
| Leptotrichia_wadei                                   | 0.00<br>012<br>693      | 3.27<br>732<br>E-<br>05 | Actinobacteria_PeM1<br>5_uncultured_soil            | 0 | 0 | Saccharimonadales_L<br>WQ8uncultured_Candidatus         | 7.01<br>779<br>E-<br>05 | 1.81<br>199<br>E-<br>05 | ASV_1642                                                     | 1.44<br>781<br>E-<br>05 | 3.73<br>823<br>E-<br>06 | ASV_13403 | 0 | 0 | Actinobacillus_sp.                                       | 0 | 0 |
| Omnitrophales_uncultured_bacterium                   | 0.00<br>012<br>693      | 3.27<br>732<br>E-<br>05 | Actinobacteria_sp.                                  | 0 | 0 | Leptotrichia_uncultured_bacterium                       | 6.95<br>144<br>E-<br>05 | 1.79<br>485<br>E-<br>05 | MND1_sp.                                                     | 1.44<br>781<br>E-<br>05 | 3.73<br>823<br>E-<br>06 | ASV_13405 | 0 | 0 | Actinobacteria_0319-7L14_uncultured_actinobacterium      | 0 | 0 |
| Prevotella_uncultured_bacterium                      | 0.00<br>012<br>693      | 3.27<br>732<br>E-<br>05 | Actinobacteria_uncultured_bacterium                 | 0 | 0 | Microsillaceae_OLB1<br>2uncultured_prokaryote           | 6.95<br>144<br>E-<br>05 | 1.79<br>485<br>E-<br>05 | Pirellulaceae_uncultured_bacterium_enrichment                | 1.44<br>781<br>E-<br>05 | 3.73<br>823<br>E-<br>06 | ASV_13432 | 0 | 0 | Actinobacteria_PeM1<br>5_bacterium_rJ7                   | 0 | 0 |
| Sphingomonadaceae_sp.                                | 0.00<br>012<br>693      | 3.27<br>732<br>E-<br>05 | Actinobacteria_uncultured_metagenome                | 0 | 0 | Berkeleya_fennica                                       | 6.85<br>918<br>E-<br>05 | 1.77<br>103<br>E-<br>05 | Sphingobacteriales_nv.OPS_17_uncultured_bacterium            | 1.44<br>781<br>E-<br>05 | 3.73<br>823<br>E-<br>06 | ASV_13441 | 0 | 0 | Actinobacteria_PeM1<br>5_metagenome                      | 0 | 0 |
| Tsakamuraella_pauro<br>metabola                      | 0.00<br>012<br>693      | 3.27<br>732<br>E-<br>05 | Actinobacteria_uncultured_sp.                       | 0 | 0 | Candidatus_Omnitrophus_metagenome                       | 6.85<br>918<br>E-<br>05 | 1.77<br>103<br>E-<br>05 | Sphingomonas_sp.                                             | 1.44<br>781<br>E-<br>05 | 3.73<br>823<br>E-<br>06 | ASV_13503 | 0 | 0 | Actinobacteria_PeM1<br>5_sp.                             | 0 | 0 |
| ASV_3256                                             | 0.00<br>011<br>883<br>5 | 3.06<br>831<br>E-<br>05 | Actinobacteriota_MB-<br>A2-108_metagenome           | 0 | 0 | Marinimicrobia_(SAR4<br>06_clade)_metagenome            | 6.85<br>918<br>E-<br>05 | 1.77<br>103<br>E-<br>05 | Hydrogenophilus_sp.                                          | 1.38<br>209<br>E-<br>05 | 3.56<br>854<br>E-<br>06 | ASV_13525 | 0 | 0 | Actinobacteria_PeM1<br>5_uncultured_soil                 | 0 | 0 |
| ASV_9544                                             | 0.00<br>011<br>883<br>5 | 3.06<br>831<br>E-<br>05 | Actinobacteriota_MB-<br>A2-108_sp.                  | 0 | 0 | Oscillospirales_UCG-<br>010_uncultured_bacterium        | 6.85<br>918<br>E-<br>05 | 1.77<br>103<br>E-<br>05 | 009E01-B-SD-<br>P15_uncultured_bacterium                     | 0                       | 0                       | ASV_13612 | 0 | 0 | Actinobacteria_PeM1<br>5uncultured_actinobacterium       | 0 | 0 |
| Candidatus_Yanofsk<br>yacteria_sp.                   | 0.00<br>011<br>883<br>5 | 3.06<br>831<br>E-<br>05 | Actinobacteriota_MB-<br>A2-108_uncultured_bacterium | 0 | 0 | Telmatoecia_sp.                                         | 6.85<br>918<br>E-<br>05 | 1.77<br>103<br>E-<br>05 | 1013-28-<br>CG33_uncultured_soil                             | 0                       | 0                       | ASV_13680 | 0 | 0 | Actinobacteria_sp.                                       | 0 | 0 |
| Elusimicrobiota_Line<br>age_lla_uncultured_bacterium | 0.00<br>011<br>883<br>5 | 3.06<br>831<br>E-<br>05 | Actinomadura_sp.                                    | 0 | 0 | Cyclobacteriaceae_uncultured_Flammeovirgaceae           | 6.75<br>459<br>E-<br>05 | 1.74<br>403<br>E-<br>05 | Absconditabacteriales_(SR1)_metagenome                       | 0                       | 0                       | ASV_13728 | 0 | 0 | Actinobacteria_uncultured_bacterium                      | 0 | 0 |
| Methanooocopusculum_uncultured_archaeon              | 0.00<br>011<br>883<br>5 | 3.06<br>831<br>E-<br>05 | Actinomyces_uncultured_bacterium                    | 0 | 0 | Fimbrioglobus_uncultured_plantomycete                   | 6.75<br>459<br>E-<br>05 | 1.74<br>403<br>E-<br>05 | Absconditabacteriales_(SR1)_uncultured_bacterium             | 0                       | 0                       | ASV_13765 | 0 | 0 | Actinobacteria_uncultured_metagenome                     | 0 | 0 |
| SAR324_clade(Marine_group_B)_sp.                     | 0.00<br>011<br>883<br>5 | 3.06<br>831<br>E-<br>05 | Actinomyces_dentalis                                | 0 | 0 | Hypomicrobium_metagenome                                | 6.75<br>459<br>E-<br>05 | 1.74<br>403<br>E-<br>05 | Absconditabacteriales_(SR1)_candidate_division               | 0                       | 0                       | ASV_13773 | 0 | 0 | Actinobacteria_uncultured_sp.                            | 0 | 0 |
| Actinobacteria_PeM1<br>5_sp.                         | 0.00<br>011<br>748<br>6 | 3.03<br>348<br>E-<br>05 | Actinomyces_graevenitzi                             | 0 | 0 | Planctomycetota_OM1<br>90_sp.                           | 6.65<br>671<br>E-<br>05 | 1.71<br>876<br>E-<br>05 | Absconditabacteriales_(SR1)_SR1_bacterium                    | 0                       | 0                       | ASV_13775 | 0 | 0 | Actinobacteria_uncultured_Actinomycetales_bacterium      | 0 | 0 |
| Planctomycetes_uncultured_Plantomycetaceae           | 0.00<br>011<br>748<br>6 | 3.03<br>348<br>E-<br>05 | Actinomyces_israelii                                | 0 | 0 | Actinomyces_unidentified                                | 0.00<br>006<br>E-<br>05 | 1.70<br>809<br>E-<br>05 | Absconditabacteriales_(SR1)_uncultured_candidate             | 0                       | 0                       | ASV_13785 | 0 | 0 | Actinobacteriota_MB-<br>A2-108_metagenome                | 0 | 0 |
| Thermovirga_uncultured_bacterium                     | 0.00<br>011<br>748<br>6 | 3.03<br>348<br>E-<br>05 | Actinomyces_sp.                                     | 0 | 0 | Defluviitaleaceae_UCG-<br>011_Lachnospiraceae_bacterium | 0.00<br>006<br>E-<br>05 | 1.70<br>809<br>E-<br>05 | Absconditabacteriales_(SR1)_uncultured_Epsilonproteobacteria | 0                       | 0                       | ASV_13794 | 0 | 0 | Actinobacteriota_MB-<br>A2-108_sp.                       | 0 | 0 |
| Beggiatoa_uncultured_prokaryote                      | 0.00<br>011<br>157      | 2.88<br>073<br>E-<br>05 | Actinomyces_unidentified                            | 0 | 0 | Fibrobacteriales_sp.                                    | 0.00<br>006<br>E-<br>05 | 1.70<br>809<br>E-<br>05 | Absconditabacteriales_(SR1)_uncultured_prokaryote            | 0                       | 0                       | ASV_13859 | 0 | 0 | Actinobacteriota_MB-<br>A2-108_uncultured_bacterium      | 0 | 0 |
| KF-JG30-<br>B3_metagenome                            | 0.00<br>011<br>157      | 2.88<br>073<br>E-<br>05 | Actinomycetaceae_F<br>0332_uncultured_bacterium     | 0 | 0 | Fimbriomonadaceae_uncultured_bacterium                  | 0.00<br>006<br>E-<br>05 | 1.70<br>809<br>E-<br>05 | ABY1_sp.                                                     | 0                       | 0                       | ASV_13883 | 0 | 0 | Actinobacteriota_MB-<br>A2-108uncultured_actinobacterium | 0 | 0 |
| Bacilli_RF39_gut_metagenome                          | 0.00<br>010<br>872<br>7 | 2.80<br>732<br>E-<br>05 | Actinomycetaceae_uncultured_bacterium               | 0 | 0 | Phocaeicola_abscessus                                   | 6.48<br>076<br>E-<br>05 | 1.67<br>333<br>E-<br>05 | Acanthopleinibacter_uncultured_bacterium                     | 0                       | 0                       | ASV_13900 | 0 | 0 | Actinomadura_sp.                                         | 0 | 0 |
| Chlamydiales_cvE6_uncultured_Chlamydia               | 0.00<br>010<br>872<br>7 | 2.80<br>732<br>E-<br>05 | Actinomycetaceae_uncultured_metagenome              | 0 | 0 | ASV_4673                                                | 6.34<br>994<br>E-<br>05 | 1.12<br>293<br>E-<br>05 | Acetitomaculum_uncultured_rumen                              | 0                       | 0                       | ASV_13923 | 0 | 0 | Actinomyces_uncultured_bacterium                         | 0 | 0 |
| Pirellulaceae_uncultured_sp.                         | 0.00<br>010<br>872<br>7 | 2.80<br>732<br>E-<br>05 | Actinomycetaceae_uncultured_rumen                   | 0 | 0 | Candidatus_Omnitrophus_sp.                              | 6.29<br>584<br>E-<br>05 | 1.62<br>558<br>E-<br>05 | Acetitomaculum_sp.                                           | 0                       | 0                       | ASV_13925 | 0 | 0 | Actinomyces_dentalis                                     | 0 | 0 |
| ASV_21086                                            | 0.00<br>010<br>791<br>8 | 2.78<br>643<br>E-<br>05 | Actinomycetaceae_uncultured_sp.                     | 0 | 0 | Spirochaetaceae_uncultured_prokaryote                   | 6.29<br>584<br>E-<br>05 | 1.62<br>558<br>E-<br>05 | Acetivibrio_uncultured_bacterium                             | 0                       | 0                       | ASV_13930 | 0 | 0 | Actinomyces_graevenitzi                                  | 0 | 0 |
| Candidatus_Giovannobacteria                          | 0.00<br>010<br>791<br>8 | 2.78<br>643<br>E-<br>05 | Actinoplanes_garbadiensis                           | 0 | 0 | uncultured_Capnocytophaga                               | 6.19<br>038<br>E-<br>05 | 1.21<br>774<br>E-<br>05 | Acetobacterium_uncultured_bacterium                          | 0                       | 0                       | ASV_13977 | 0 | 0 | Actinomyces_israelii                                     | 0 | 0 |
| Silvanigrella_metagenome                             | 0.00<br>010<br>630<br>9 | 2.74<br>489<br>E-<br>05 | Actinotalea_sp.                                     | 0 | 0 | Alkalibacter_uncultured_bacterium                       | 5.83<br>268<br>E-<br>05 | 1.50<br>599<br>E-<br>05 | Acetobacter_sp.                                              | 0                       | 0                       | ASV_14011 | 0 | 0 | Actinomyces_unidentified                                 | 0 | 0 |
| ASV_6176                                             | 9.79<br>048<br>E-<br>05 | 2.52<br>789<br>E-<br>05 | Actinotignum_sp.                                    | 0 | 0 | Schlegella_sp.                                          | 5.83<br>268<br>E-<br>05 | 1.50<br>599<br>E-<br>05 | Acetobacteraceae_sp.                                         | 0                       | 0                       | ASV_14013 | 0 | 0 | Actinomycetaceae_F<br>0332_uncultured_bacterium          | 0 | 0 |
| Emticia_sediminis                                    | 9.79<br>048<br>E-<br>05 | 2.52<br>789<br>E-<br>05 | Adhaeribacter_metagenome                            | 0 | 0 | Aquaspirillum_sp.                                       | 5.74<br>845<br>E-<br>05 | 1.48<br>424<br>E-<br>05 | Acetobacteraceae_uncultured_bacterium                        | 0                       | 0                       | ASV_14099 | 0 | 0 | Actinomycetaceae_F<br>0332unidentified                   | 0 | 0 |
| Methylophilaceae_uncultured_metagenome               | 9.79<br>048<br>E-<br>05 | 2.52<br>789<br>E-<br>05 | Adhaeribacter_uncultured_soil                       | 0 | 0 | Pseudarcicella_sp.                                      | 5.74<br>845<br>E-<br>05 | 1.48<br>424<br>E-<br>05 | Acetobacteraceae_uncultured_metagenome                       | 0                       | 0                       | ASV_14118 | 0 | 0 | Actinomycetaceae_uncultured_bacterium                    | 0 | 0 |
| Opitutus_metagenome                                  | 9.79<br>048<br>E-<br>05 | 2.52<br>789<br>E-<br>05 | Adhaeribacter_sp.                                   | 0 | 0 | Solirubrobacteraceae_uncultured_Colobanthus_quitensis   | 5.74<br>845<br>E-<br>05 | 1.48<br>424<br>E-<br>05 | Acetobacteraceae_uncultured_sp.                              | 0                       | 0                       | ASV_14135 | 0 | 0 | Actinomycetaceae_uncultured_rumen                        | 0 | 0 |
| Phycisphaera_metagenome                              | 9.79<br>048<br>E-<br>05 | 2.52<br>789<br>E-<br>05 | Advenella_sp.                                       | 0 | 0 | Gaiellales_sp.                                          | 5.60<br>749<br>E-<br>05 | 1.13<br>928<br>E-<br>05 | Acetobacterium_sp.                                           | 0                       | 0                       | ASV_14140 | 0 | 0 | Actinomycetaceae_uncultured_sp.                          | 0 | 0 |
| Cellvibrio_sp.                                       | 8.46<br>203<br>E-<br>05 | 2.18<br>489<br>E-<br>05 | Aenigmarchaeales_sp.                                | 0 | 0 | Mitochondria_sp.                                        | 0.00<br>005<br>E-<br>05 | 1.44<br>580<br>E-<br>05 | Acetothermia_uncultured_bacterium                            | 0                       | 0                       | ASV_14196 | 0 | 0 | Actinomycesospora_sp.                                    | 0 | 0 |
| Psychrobacter_sanguinis                              | 8.46<br>203<br>E-<br>05 | 2.18<br>489<br>E-<br>05 | Aenigmarchaeota_sp.                                 | 0 | 0 | alpha_proteobacterium                                   | 5.26<br>334<br>E-<br>05 | 1.35<br>899<br>E-<br>05 | Acholeplasma_uncultured_bacterium                            | 0                       | 0                       | ASV_14325 | 0 | 0 | Actinoplanes_garbadiensis                                | 0 | 0 |

|                                                     |                         |                         |                                                 |   |   |                                                                   |                         |                         |                                                    |   |   |           |   |   |                                                 |   |   |
|-----------------------------------------------------|-------------------------|-------------------------|-------------------------------------------------|---|---|-------------------------------------------------------------------|-------------------------|-------------------------|----------------------------------------------------|---|---|-----------|---|---|-------------------------------------------------|---|---|
| Acidimicrobia_IMCC 26256uncultured_actinobacterium  | 7.83<br>239<br>E-<br>05 | 2.02<br>231<br>E-<br>05 | Aequorivita_sp.                                 | 0 | 0 | Anaerovoracaceae_Family_XIII_AD3011_group_uncultured_rumen        | 5.26<br>334<br>E-<br>05 | 1.35<br>899<br>E-<br>05 | Acholeplasma_axanthum                              | 0 | 0 | ASV_14332 | 0 | 0 | Actinoplanes_sp.                                | 0 | 0 |
| Arcicella_rigui                                     | 7.83<br>239<br>E-<br>05 | 2.02<br>231<br>E-<br>05 | Aerococcaceae_sp.                               | 0 | 0 | ASV_21256                                                         | 5.26<br>334<br>E-<br>05 | 1.35<br>899<br>E-<br>05 | Acholeplasma_brassicae                             | 0 | 0 | ASV_14376 | 0 | 0 | Actinotalea_sp.                                 | 0 | 0 |
| ASV_19296                                           | 7.83<br>239<br>E-<br>05 | 2.02<br>231<br>E-<br>05 | Aerococcaceae_uncultured_bacterium              | 0 | 0 | ASV_21257                                                         | 5.26<br>334<br>E-<br>05 | 1.35<br>899<br>E-<br>05 | Acholeplasma_laidlawii                             | 0 | 0 | ASV_14382 | 0 | 0 | Actinotignum_sp.                                | 0 | 0 |
| Caulobacteraceae_uncultured_eubacterium             | 7.83<br>239<br>E-<br>05 | 2.02<br>231<br>E-<br>05 | Aerococcus_sp.                                  | 0 | 0 | ASV_21259                                                         | 5.26<br>334<br>E-<br>05 | 1.35<br>899<br>E-<br>05 | Acholeplasma_morum                                 | 0 | 0 | ASV_144   | 0 | 0 | Adhaeribacter_meta genome                       | 0 | 0 |
| Cyanobium_PCC-6307_Synechococcus-like_str.          | 7.83<br>239<br>E-<br>05 | 2.02<br>231<br>E-<br>05 | Aeromicrobium_sp.                               | 0 | 0 | Saprosiraceae_uncultured_metagenome                               | 5.26<br>334<br>E-<br>05 | 1.35<br>899<br>E-<br>05 | Acholeplasma_sp.                                   | 0 | 0 | ASV_14404 | 0 | 0 | Adhaeribacter_uncultured_soil                   | 0 | 0 |
| Desulfatirhabdium_uncultured_bacterium              | 7.83<br>239<br>E-<br>05 | 2.02<br>231<br>E-<br>05 | Aeromonas_metagenome                            | 0 | 0 | Gamma proteobacteria_CHAB-XL27_uncultured_bacterium               | 5.21<br>358<br>E-<br>05 | 1.34<br>614<br>E-<br>05 | Acholeplasmataceae_EMP-G18_uncultured_Molluscites  | 0 | 0 | ASV_14447 | 0 | 0 | Adhaeribacter_sp.                               | 0 | 0 |
| Gemmataceae_uncultured_plancymyctere                | 7.83<br>239<br>E-<br>05 | 2.02<br>231<br>E-<br>05 | Aeromonas_sp.                                   | 0 | 0 | Micropepsaceae_uncultured_metagenome                              | 0.00<br>005<br>E-<br>05 | 1.33<br>866<br>E-<br>05 | Acholeplasma_uncultured_Acholeplasmataceae         | 0 | 0 | ASV_14482 | 0 | 0 | Advenella_sp.                                   | 0 | 0 |
| Pectobacteriaceae_spp.                              | 7.83<br>239<br>E-<br>05 | 2.02<br>231<br>E-<br>05 | Aeromonas_uncultured_gamma                      | 0 | 0 | Peptostreptococcales-Tissierellales_uncultured_Peptostreptococcus | 0.00<br>005<br>E-<br>05 | 1.33<br>866<br>E-<br>05 | Achromatium_sp.                                    | 0 | 0 | ASV_14494 | 0 | 0 | Aerigmarchaeales_spp.                           | 0 | 0 |
| Acidimicrobia_sp.                                   | 7.43<br>799<br>E-<br>05 | 1.92<br>048<br>E-<br>05 | Aerosphaera_uncultured_bacterium                | 0 | 0 | Planctomycetes_Pla4_lineage_metagenome                            | 0.00<br>005<br>E-<br>05 | 1.33<br>866<br>E-<br>05 | Acidaminobacter_uncultured_bacterium               | 0 | 0 | ASV_14534 | 0 | 0 | Aerigmarcheota_sp.                              | 0 | 0 |
| ASV_21692                                           | 7.43<br>799<br>E-<br>05 | 1.92<br>048<br>E-<br>05 | Aerosphaera_sp.                                 | 0 | 0 | ASV_20969                                                         | 5.06<br>594<br>E-<br>05 | 1.30<br>802<br>E-<br>05 | Acidaminococcaceae_uncultured_bacterium            | 0 | 0 | ASV_14583 | 0 | 0 | Aerococcaceae_sp.                               | 0 | 0 |
| Longimicrobiaceae_uncultured_soil                   | 7.43<br>799<br>E-<br>05 | 1.92<br>048<br>E-<br>05 | Afipia_genosp.                                  | 0 | 0 | ASV_20970                                                         | 5.06<br>594<br>E-<br>05 | 1.30<br>802<br>E-<br>05 | Acidibacter_metagenome                             | 0 | 0 | ASV_14663 | 0 | 0 | Aerococcaceae_uncultured_bacterium              | 0 | 0 |
| Solirubrobacteraceae_uncultured_Phytoplasma_sp.     | 7.43<br>799<br>E-<br>05 | 1.92<br>048<br>E-<br>05 | Afipia_sp.                                      | 0 | 0 | Blastococcus_sp.                                                  | 5.06<br>594<br>E-<br>05 | 1.30<br>802<br>E-<br>05 | Acidibacter_uncultured_bacterium                   | 0 | 0 | ASV_14678 | 0 | 0 | Aerococcus_sp.                                  | 0 | 0 |
| Plantibacter_sp.                                    | 7.25<br>742<br>E-<br>05 | 1.87<br>386<br>E-<br>05 | Agathobacter_sp.                                | 0 | 0 | Burkholderiales_sp.                                               | 5.06<br>594<br>E-<br>05 | 1.30<br>802<br>E-<br>05 | Acidibacter_sp.                                    | 0 | 0 | ASV_14706 | 0 | 0 | Aeromicrobium_sp.                               | 0 | 0 |
| ZOR0006_sp.                                         | 7.24<br>848<br>E-<br>05 | 1.87<br>155<br>E-<br>05 | Aggregatibacter_actinomycetecomitans            | 0 | 0 | Ekhidna_sp.                                                       | 5.06<br>594<br>E-<br>05 | 1.30<br>802<br>E-<br>05 | Acidimicrobia_IMCC 26256_metagenome                | 0 | 0 | ASV_14729 | 0 | 0 | Aeromonas_metagenome                            | 0 | 0 |
| Candidatus_Lloydbacteria_uncultured_bacterium       | 0.00<br>007<br>E-<br>05 | 1.85<br>761<br>E-<br>05 | Aggregatibacter_sp.                             | 0 | 0 | Opitutaceae_uncultured_metagenome                                 | 5.06<br>594<br>E-<br>05 | 1.30<br>802<br>E-<br>05 | Acidimicrobia_IMCC 26256_sp.                       | 0 | 0 | ASV_14736 | 0 | 0 | Aeromonas_sp.                                   | 0 | 0 |
| Eggerthellaceae_DM ER64_Rikenellaceae_bacterium     | 0.00<br>007<br>E-<br>05 | 1.85<br>761<br>E-<br>05 | Agitococcus_lubricus_group_uncultured_bacterium | 0 | 0 | ASV_2249                                                          | 4.96<br>155<br>E-<br>05 | 1.28<br>107<br>E-<br>05 | Acidimicrobia_IMCC 26256_uncultured_bacterium      | 0 | 0 | ASV_14771 | 0 | 0 | Aeromonas_uncultured_gamma                      | 0 | 0 |
| Fibrobacteraceae_uncultured_metagenome              | 0.00<br>007<br>E-<br>05 | 1.85<br>761<br>E-<br>05 | Agitococcus_lubricus_group_sp.                  | 0 | 0 | ASV_2910                                                          | 4.96<br>155<br>E-<br>05 | 1.28<br>107<br>E-<br>05 | Acidimicrobia_IMCC 26256_uncultured_soil           | 0 | 0 | ASV_14819 | 0 | 0 | Aerosphaera_uncultured_bacterium                | 0 | 0 |
| Neochlamydia_metagenome                             | 0.00<br>007<br>E-<br>05 | 1.85<br>761<br>E-<br>05 | Agrococcus_sp.                                  | 0 | 0 | ASV_5084                                                          | 4.96<br>155<br>E-<br>05 | 1.28<br>107<br>E-<br>05 | Acidimicrobia_IMCC 26256uncultured_Actiditerimonas | 0 | 0 | ASV_14825 | 0 | 0 | Aerosphaera_sp.                                 | 0 | 0 |
| Saprosiraceae_uncultured_sp.                        | 0.00<br>007<br>E-<br>05 | 1.85<br>761<br>E-<br>05 | Agromyces_sp.                                   | 0 | 0 | Bdellovibrionaceae_O M27_clade_metagenome                         | 4.96<br>155<br>E-<br>05 | 1.28<br>107<br>E-<br>05 | Acidimicrobia_IMCC 26256uncultured_actinobacterium | 0 | 0 | ASV_14847 | 0 | 0 | Aestuaniella_uncultured_bacterium               | 0 | 0 |
| Lachnospiraceae_UCG-002_uncultured_rumen            | 5.87<br>429<br>E-<br>05 | 1.51<br>674<br>E-<br>05 | Ahniella_affigens                               | 0 | 0 | Holdemania_sp.                                                    | 4.96<br>155<br>E-<br>05 | 1.28<br>107<br>E-<br>05 | Acidimicrobia_IMCC 26256uncultured_Actinomyces     | 0 | 0 | ASV_14864 | 0 | 0 | Afipia_genosp.                                  | 0 | 0 |
| Phaselocystis_Myxococcales_bacterium                | 5.87<br>429<br>E-<br>05 | 1.51<br>674<br>E-<br>05 | Ahniella_metagenome                             | 0 | 0 | Oligoflexia_0319-6G20_metagenome                                  | 4.96<br>155<br>E-<br>05 | 1.28<br>107<br>E-<br>05 | Acidimicrobia_sp.                                  | 0 | 0 | ASV_14881 | 0 | 0 | Afipia_sp.                                      | 0 | 0 |
| Treponema_sp.                                       | 5.87<br>429<br>E-<br>05 | 1.51<br>674<br>E-<br>05 | Ahniella_uncultured_bacterium                   | 0 | 0 | Porphyromonas_catoniae                                            | 4.96<br>155<br>E-<br>05 | 1.28<br>107<br>E-<br>05 | Acidimicrobia_uncultured_bacterium                 | 0 | 0 | ASV_14909 | 0 | 0 | Agathobacter_sp.                                | 0 | 0 |
| ASV_21525                                           | 3.91<br>619<br>E-<br>05 | 1.01<br>116<br>E-<br>05 | Akkermansia_uncultured_bacterium                | 0 | 0 | uncultured_uncultured_sp.                                         | 4.96<br>155<br>E-<br>05 | 1.28<br>107<br>E-<br>05 | Acidimicrobia_uncultured_metagenome                | 0 | 0 | ASV_14953 | 0 | 0 | Aggregatibacter_actinomycetecomitans            | 0 | 0 |
| Candidatus_Nomura bacteria_uncultured_Parcubacteria | 3.91<br>619<br>E-<br>05 | 1.01<br>116<br>E-<br>05 | Alcaligenaceae_sp.                              | 0 | 0 | Gemmataceae_Zavarzinellauncultured_Zavarzinella                   | 0.00<br>004<br>E-<br>05 | 1.22<br>768<br>E-<br>05 | Acidimicrobia_uncultured_sp.                       | 0 | 0 | ASV_14967 | 0 | 0 | Aggregatibacter_sp.                             | 0 | 0 |
| Dojkabacteria_uncultured_bacterium                  | 3.91<br>619<br>E-<br>05 | 1.01<br>116<br>E-<br>05 | Alcaligenes_sp.                                 | 0 | 0 | ASV_1837                                                          | 4.57<br>279<br>E-<br>05 | 1.18<br>069<br>E-<br>05 | Acidimicrobia_uncultured_Acidimicrobia             | 0 | 0 | ASV_15004 | 0 | 0 | Agitococcus_lubricus_group_uncultured_bacterium | 0 | 0 |
| Microbacterium_sp.                                  | 3.91<br>619<br>E-<br>05 | 1.01<br>116<br>E-<br>05 | Algibacter_sp.                                  | 0 | 0 | Saccharimonadales_uncultured_soil                                 | 4.57<br>279<br>E-<br>05 | 1.18<br>069<br>E-<br>05 | Acidimicrobia_uncultured_actinobacterium           | 0 | 0 | ASV_15081 | 0 | 0 | Agitococcus_lubricus_group_sp.                  | 0 | 0 |
| 009E01-B-SD-P15_uncultured_bacterium                | 0                       | 0                       | Algoriphagus_sp.                                | 0 | 0 | WOR-1_uncultured_bacterium                                        | 4.57<br>279<br>E-<br>05 | 1.18<br>069<br>E-<br>05 | Acidimicrobia_uncultured_Actinomycetales           | 0 | 0 | ASV_15083 | 0 | 0 | Agromyces_sp.                                   | 0 | 0 |
| 1013-28-CG33_uncultured_soil                        | 0                       | 0                       | Algoriphagus_uncultured_Hongliella              | 0 | 0 | Acidimicrobia_IMCC2 6256_sp.                                      | 4.53<br>653<br>E-<br>05 | 1.17<br>133<br>E-<br>05 | Acidimicrobia_uncultured_bacterium_YC-ZSS-LKJ199   | 0 | 0 | ASV_15102 | 0 | 0 | Ahniella_affigens                               | 0 | 0 |
| Abditbacterium_sp.                                  | 0                       | 0                       | Aliidimarina_uncultured_bacterium               | 0 | 0 | Alishewanella_sp.                                                 | 4.53<br>653<br>E-<br>05 | 1.17<br>133<br>E-<br>05 | Acidiphilium_uncultured_bacterium                  | 0 | 0 | ASV_15165 | 0 | 0 | Ahniella_metagenome                             | 0 | 0 |
| Absconditbacteriales_(SRT1)_metagenome              | 0                       | 0                       | Aliidongia_dinghuensis                          | 0 | 0 | Bacteroidales_RF16_group_uncultured_bacterium                     | 4.53<br>653<br>E-<br>05 | 1.17<br>133<br>E-<br>05 | Acidiphilium_sp.                                   | 0 | 0 | ASV_15198 | 0 | 0 | Ahniella_uncultured_bacterium                   | 0 | 0 |

|                                                              |   |   |                                                        |   |   |                                                |                         |                         |                                                     |   |   |           |   |   |                                                        |   |   |
|--------------------------------------------------------------|---|---|--------------------------------------------------------|---|---|------------------------------------------------|-------------------------|-------------------------|-----------------------------------------------------|---|---|-----------|---|---|--------------------------------------------------------|---|---|
| Absconditabacteriales_(SR1)_uncultured_bacterium             | 0 | 0 | Alivivrio_sp.                                          | 0 | 0 | Pseudomonas_peli                               | 4.53<br>653<br>E-<br>05 | 1.17<br>133<br>E-<br>06 | Acidisoma_sp.                                       | 0 | 0 | ASV_15233 | 0 | 0 | Akkermansia_sp.                                        | 0 | 0 |
| Absconditabacteriales_(SR1)_candidate_division               | 0 | 0 | Alisewanella_sp.                                       | 0 | 0 | ASV_3161                                       | 4.31<br>134<br>E-<br>05 | 1.11<br>318<br>E-<br>06 | Acidithiobacillaceae_KCM-B-112_sp.                  | 0 | 0 | ASV_15253 | 0 | 0 | Akkermansia_uncultured_bacterium                       | 0 | 0 |
| Absconditabacteriales_(SR1)_sp.                              | 0 | 0 | Alisewanella_uncultured_bacterium                      | 0 | 0 | Candidatus_Portnoybacteria_uncultured_deep-sea | 4.31<br>134<br>E-<br>05 | 1.11<br>318<br>E-<br>06 | Acidithiobacillus_ferrous_oxidans                   | 0 | 0 | ASV_15298 | 0 | 0 | Alcaligenes_sp.                                        | 0 | 0 |
| Absconditabacteriales_(SR1)_SR1_bacterium                    | 0 | 0 | Alistipes_gut_metagenome                               | 0 | 0 | Cloacimonadia_sp.                              | 4.31<br>134<br>E-<br>05 | 1.11<br>318<br>E-<br>06 | Acidobacteria_bacterium                             | 0 | 0 | ASV_15306 | 0 | 0 | Algibacter_sp.                                         | 0 | 0 |
| Absconditabacteriales_(SR1)_uncultured_candidate             | 0 | 0 | Alistipes_sp.                                          | 0 | 0 | Brevifolilis_sp.                               | 3.88<br>845<br>E-<br>05 | 1.00<br>399<br>E-<br>06 | Acidobacteriaceae_(Subgroup_1)_sp.                  | 0 | 0 | ASV_15330 | 0 | 0 | Algoriphagus_sp.                                       | 0 | 0 |
| Absconditabacteriales_(SR1)_uncultured_Epsilonproteobacteria | 0 | 0 | Alistipes_uncultured_Alistipes                         | 0 | 0 | ASV_20078                                      | 3.80<br>384<br>E-<br>05 | 9.82<br>147<br>E-<br>06 | Acidobacteriae_Elev-16S-1166_sp.                    | 0 | 0 | ASV_15347 | 0 | 0 | Algoriphagus_uncultured_Bacteroidetes                  | 0 | 0 |
| Absconditabacteriales_(SR1)_uncultured_organism              | 0 | 0 | Alistipes_uncultured_bacterium                         | 0 | 0 | Planctomycetota_BD7-11_uncultured_marine       | 3.80<br>384<br>E-<br>05 | 9.82<br>147<br>E-<br>06 | Acidobacteriae_Elev-16S-1166_uncultured_bacterium   | 0 | 0 | ASV_15366 | 0 | 0 | Algoriphagus_uncultured_Hongjiella                     | 0 | 0 |
| Absconditabacteriales_(SR1)_uncultured_prokaryote            | 0 | 0 | Alistipes_uncultured_Bacteroidetes                     | 0 | 0 | SJA-15_uncultured_soil                         | 3.80<br>384<br>E-<br>05 | 9.82<br>147<br>E-<br>06 | Acidobacteriae_sp.                                  | 0 | 0 | ASV_15373 | 0 | 0 | Alivivrio_sp.                                          | 0 | 0 |
| Acanthopleuribacterium_uncultured_bacterium                  | 0 | 0 | Aliterella_cyanobacterium_OU_20                        | 0 | 0 | ASV_21920                                      | 0.00<br>003<br>508<br>9 | 9.05<br>994<br>E-<br>06 | Acidocella_uncultured_bacterium                     | 0 | 0 | ASV_15451 | 0 | 0 | Alisewanella_sp.                                       | 0 | 0 |
| Acetitomaculum_uncultured_bacterium                          | 0 | 0 | Aliterella_sp.                                         | 0 | 0 | Candidatus_Kuenenbacteria_uncultured_bacterium | 0.00<br>003<br>508<br>9 | 9.05<br>994<br>E-<br>06 | Acidothermus_uncultured_bacterium                   | 0 | 0 | ASV_15470 | 0 | 0 | Alisewanella_uncultured_bacterium                      | 0 | 0 |
| Acetitomaculum_uncultured_rumen                              | 0 | 0 | Aliterella_uncultured_bacterium                        | 0 | 0 | Alphaproteobacteria_sp.                        | 3.47<br>572<br>E-<br>05 | 8.97<br>427<br>E-<br>06 | Acidothermus_sp.                                    | 0 | 0 | ASV_15543 | 0 | 0 | Alistipes_gut_metagenome                               | 0 | 0 |
| Acetitomaculum_sp.                                           | 0 | 0 | Alkalibacter_uncultured_bacterium                      | 0 | 0 | Neisseria_sp.                                  | 3.47<br>572<br>E-<br>05 | 8.97<br>427<br>E-<br>06 | Acidovorax_sp.                                      | 0 | 0 | ASV_15546 | 0 | 0 | Alistipes_sp.                                          | 0 | 0 |
| Acetivivrio_uncultured_bacterium                             | 0 | 0 | Alkalibacterium_uncultured_bacterium                   | 0 | 0 | Oxalobacteriaceae_sp.                          | 3.47<br>572<br>E-<br>05 | 8.97<br>427<br>E-<br>06 | Acinetobacter_meta-genome                           | 0 | 0 | ASV_15570 | 0 | 0 | Alistipes_uncultured_Alistipes                         | 0 | 0 |
| Acetanaerobium_uncultured_bacterium                          | 0 | 0 | Alkanibacter_metagenome                                | 0 | 0 | Pseudorhodobacter_sp.                          | 3.47<br>572<br>E-<br>05 | 8.97<br>427<br>E-<br>06 | Acinetobacter_baumannii                             | 0 | 0 | ASV_15576 | 0 | 0 | Alistipes_uncultured_bacterium                         | 0 | 0 |
| Acetobacter_sp.                                              | 0 | 0 | Alkanindiges_sp.                                       | 0 | 0 | Ruminiclostridium_sp.                          | 3.47<br>572<br>E-<br>05 | 8.97<br>427<br>E-<br>06 | Acinetobacter_kyonggiensis                          | 0 | 0 | ASV_15672 | 0 | 0 | Alistipes_uncultured_Bacteroidetes                     | 0 | 0 |
| Acetobacteraceae_sp.                                         | 0 | 0 | Alkanindiges_uncultured_bacterium                      | 0 | 0 | Turicella_uncultured_bacterium                 | 3.47<br>572<br>E-<br>05 | 8.97<br>427<br>E-<br>06 | Acinetobacter_sp.                                   | 0 | 0 | ASV_15707 | 0 | 0 | Aliterella_cyanobacterium_OU_20                        | 0 | 0 |
| Acetobacteraceae_uncultured_bacterium                        | 0 | 0 | Alkanindiges_uncultured_gamma                          | 0 | 0 | Actinobacteria_PeM15_bacterium_rJ7             | 3.37<br>729<br>E-<br>05 | 8.72<br>013<br>E-<br>06 | Acinetobacter_towneri                               | 0 | 0 | ASV_1571  | 0 | 0 | Aliterella_sp.                                         | 0 | 0 |
| Acetobacteraceae_uncultured_metagenome                       | 0 | 0 | Allobranchiobius_sp.                                   | 0 | 0 | Agathobacter_sp.                               | 3.37<br>729<br>E-<br>05 | 8.72<br>013<br>E-<br>06 | Actinobacillus_sp.                                  | 0 | 0 | ASV_15723 | 0 | 0 | Aliterella_uncultured_bacterium                        | 0 | 0 |
| Acetobacteraceae_uncultured_sp.                              | 0 | 0 | Alloicoccus_uncultured_bacterium                       | 0 | 0 | Bacilli_RF39_uncultured_Firmicutes             | 3.37<br>729<br>E-<br>05 | 8.72<br>013<br>E-<br>06 | Actinobacteria_0319-7L14_uncultured_actinobacterium | 0 | 0 | ASV_15737 | 0 | 0 | Alkalibacter_uncultured_bacterium                      | 0 | 0 |
| Acetobacterium_sp.                                           | 0 | 0 | Alloprevotella_rava                                    | 0 | 0 | Bacteroides_graminisolvans                     | 3.37<br>729<br>E-<br>05 | 8.72<br>013<br>E-<br>06 | Actinobacteria_PeM15_bacterium_rJ7                  | 0 | 0 | ASV_15770 | 0 | 0 | Alkalibacterium_uncultured_bacterium                   | 0 | 0 |
| Acetothermia_uncultured_bacterium                            | 0 | 0 | Alloprevotella_tanneriae                               | 0 | 0 | Chloroplast_Cinnamomum_camphora                | 3.37<br>729<br>E-<br>05 | 8.72<br>013<br>E-<br>06 | Actinobacteria_PeM15_metagenome                     | 0 | 0 | ASV_15776 | 0 | 0 | Alkanibacter_metagenome                                | 0 | 0 |
| Acholeplasma_axanthum                                        | 0 | 0 | Alloprevotella_uncultured_Bacteroidales                | 0 | 0 | Pirellula_metagenome                           | 3.37<br>729<br>E-<br>05 | 8.72<br>013<br>E-<br>06 | Actinobacteria_PeM15_sp.                            | 0 | 0 | ASV_15821 | 0 | 0 | Alkanindiges_sp.                                       | 0 | 0 |
| Acholeplasma_brassicae                                       | 0 | 0 | Allorhizobium-Neorhizobium-Pararhizobium-Rhizobium_sp. | 0 | 0 | Roseimarinus_uncultured_bacterium              | 3.37<br>729<br>E-<br>05 | 8.72<br>013<br>E-<br>06 | Actinobacteria_PeM15_uncultured_soil                | 0 | 0 | ASV_15881 | 0 | 0 | Alkanindiges_uncultured_bacterium                      | 0 | 0 |
| Acholeplasma_morum                                           | 0 | 0 | Alloscardovia_omnicolens                               | 0 | 0 | Woeseearchaeales_sp.                           | 3.37<br>729<br>E-<br>05 | 8.72<br>013<br>E-<br>06 | Actinobacteria_PeM15_uncultured_actinobacterium     | 0 | 0 | ASV_15912 | 0 | 0 | Alkanindiges_uncultured_gamma                          | 0 | 0 |
| Acholeplasma_sp.                                             | 0 | 0 | allotenuales_AKIW781_uncultured_bacterium              | 0 | 0 | Xanthobacteriaceae_sp.                         | 3.37<br>729<br>E-<br>05 | 8.72<br>013<br>E-<br>06 | Actinobacteria_uncultured_bacterium                 | 0 | 0 | ASV_1592  | 0 | 0 | Allobranchiobius_sp.                                   | 0 | 0 |
| Acholeplasmataceae_EMP-G16_uncultured_Mollicutes             | 0 | 0 | alpha_proteobacterium                                  | 0 | 0 | ASV_21519                                      | 0.00<br>003<br>307<br>7 | 8.54<br>044<br>E-<br>06 | Actinobacteria_uncultured_metagenome                | 0 | 0 | ASV_15920 | 0 | 0 | Alloicoccus_uncultured_bacterium                       | 0 | 0 |
| Acholeplasmauncultured_Acholeplasmataceae                    | 0 | 0 | Alphaproteobacteria_bacterium                          | 0 | 0 | Candidatus_Diapherotrites                      | 0.00<br>003<br>307<br>7 | 8.54<br>044<br>E-<br>06 | Actinobacteria_uncultured_sp.                       | 0 | 0 | ASV_15928 | 0 | 0 | Alloprevotella_rava                                    | 0 | 0 |
| Achromatium_sp.                                              | 0 | 0 | Alphaproteobacteria_sp.                                | 0 | 0 | Ferruginibacter_uncultured_soil                | 0.00<br>003<br>307<br>7 | 8.54<br>044<br>E-<br>06 | Actinobacteria_uncultured_Actinomycetales_bacterium | 0 | 0 | ASV_15996 | 0 | 0 | Alloprevotella_sp.                                     | 0 | 0 |
| Acidaminobacter_uncultured_bacterium                         | 0 | 0 | Alphaproteobacteria_uncultured_metagenome              | 0 | 0 | Finogoldia_uncultured_bacterium                | 0.00<br>003<br>307<br>7 | 8.54<br>044<br>E-<br>06 | Actinobacteriota_MB-A2-108_metagenome               | 0 | 0 | ASV_16023 | 0 | 0 | Alloprevotella_tanneriae                               | 0 | 0 |
| Acidaminococcaceae_uncultured_bacterium                      | 0 | 0 | Alphaproteobacteria_uncultured_bacterium_enrichment    | 0 | 0 | Gemmimonadaceae_uncultured_metagenome          | 0.00<br>003<br>307<br>7 | 8.54<br>044<br>E-<br>06 | Actinobacteriota_MB-A2-108_sp.                      | 0 | 0 | ASV_16127 | 0 | 0 | Allorhizobium-Neorhizobium-Pararhizobium-Rhizobium_sp. | 0 | 0 |

|                                                     |   |   |                                                              |   |   |                                                         |                |               |                                                       |   |   |           |   |   |                                                              |   |   |
|-----------------------------------------------------|---|---|--------------------------------------------------------------|---|---|---------------------------------------------------------|----------------|---------------|-------------------------------------------------------|---|---|-----------|---|---|--------------------------------------------------------------|---|---|
| Acidbacter__metag nome                              | 0 | 0 | Alphaproteobacteria_ uncultured_eubacteri um                 | 0 | 0 | Anaerostinus_ uncultur ed_bacterium                     | 3.24 038 E-05  | 8.36 663 E-06 | Actinobacteriota_MB-A2-108_ uncultured_bact erium     | 0 | 0 | ASV_16215 | 0 | 0 | Alloscardovia_ omnico lens                                   | 0 | 0 |
| Acidbacter_ uncultur ed_bacterium                   | 0 | 0 | Alphaproteobacteria_ uncultured_gut__met agenome             | 0 | 0 | Burkholderiales_B1-7BS_metagenome                       | 3.24 038 E-05  | 8.36 663 E-06 | Actinobacteriota_MB-A2-108uncultured_actino bacterium | 0 | 0 | ASV_16250 | 0 | 0 | allotenuales_AKIW781_ uncultured_bacteri um                  | 0 | 0 |
| Acidbacter_sp.                                      | 0 | 0 | Alphaproteobacteria_ uncultured_Novosphi ngobium             | 0 | 0 | Massilia_sp.                                            | 3.24 038 E-05  | 8.36 663 E-06 | Actinomyces_ uncult ured_bacterium                    | 0 | 0 | ASV_16300 | 0 | 0 | alpha__proteobacteriu m                                      | 0 | 0 |
| Acidimicrobia_IMCC 26256_metagenome                 | 0 | 0 | Alphaproteobacteria_ uncultured_Rhodospir illaceae_bacterium | 0 | 0 | Sporichthyaceae_hgcl_clade_metageno me                  | 3.24 038 E-05  | 8.36 663 E-06 | Actinomyces_sp.                                       | 0 | 0 | ASV_16302 | 0 | 0 | Alphaproteobacteria_ bacterium                               | 0 | 0 |
| Acidimicrobia_IMCC 26256_sp.                        | 0 | 0 | Altererythrobacter_ alp ha__proteobacterium                  | 0 | 0 | Bdellovibrio_ unculture d_bacterium                     | 2.87 422 E-05  | 7.42 12E-06   | Actinomyces_ unident ified                            | 0 | 0 | ASV_16316 | 0 | 0 | Alphaproteobacteria_ sp.                                     | 0 | 0 |
| Acidimicrobia_IMCC 26256_ uncultured_ba cterium     | 0 | 0 | Alysiella_sp.                                                | 0 | 0 | Tepidimonas_sp.                                         | 2.87 422 E-05  | 7.42 12E-06   | Actinomycetaceae_F 0332_ uncultured_bac terium        | 0 | 0 | ASV_16374 | 0 | 0 | alphaproteobacteria_ uncultured__bacteriu m                  | 0 | 0 |
| Acidimicrobia_IMCC 26256_ uncultured_so il          | 0 | 0 | Alysiella_ uncultured_ bacterium                             | 0 | 0 | Alkanindiges_sp.                                        | 2.85 288 E-05  | 7.36 61E-06   | Actinomycetaceae_u ncultured__metageno me             | 0 | 0 | ASV_16382 | 0 | 0 | Alphaproteobacteria_ uncultured__bacteriu m                  | 0 | 0 |
| Acidimicrobia_IMCC 26256uncultured_Aci diterimonas  | 0 | 0 | Amaricoccus_sp.                                              | 0 | 0 | Arenimonas_sp.                                          | 2.85 288 E-05  | 7.36 61E-06   | Actinomycetaceae_u ncultured_rumen                    | 0 | 0 | ASV_16398 | 0 | 0 | Alphaproteobacteria_ uncultured__metagen ome                 | 0 | 0 |
| Acidimicrobia_IMCC 26256uncultured_Acti nomycetales | 0 | 0 | Amaricoccus_tamwor thensis                                   | 0 | 0 | ASV_21166                                               | 2.85 288 E-05  | 7.36 61E-06   | Actinomycetaceae_u ncultured_sp.                      | 0 | 0 | ASV_164   | 0 | 0 | Alphaproteobacteria_ uncultured__sp.                         | 0 | 0 |
| Acidimicrobia_ uncult ured_bacterium                | 0 | 0 | Amb-16S-1323_ uncultured_bac terium                          | 0 | 0 | Desulfobacterota_ unc ultured_Desulfuromon adales       | 2.85 288 E-05  | 7.36 61E-06   | Actinomycetospora_s p.                                | 0 | 0 | ASV_1642  | 0 | 0 | Alphaproteobacteria_ uncultured_Alphaprot eobactera          | 0 | 0 |
| Acidimicrobia_ uncult ured__metagenome              | 0 | 0 | Aminobacter_sp.                                              | 0 | 0 | Oligoflexia_0319-6520_ uncultured_prok aryote           | 2.85 288 E-05  | 7.36 61E-06   | Actinoplanes_garbadi nensis                           | 0 | 0 | ASV_16447 | 0 | 0 | Alphaproteobacteria_ uncultured_bacterium _enrichment        | 0 | 0 |
| Acidimicrobia_ uncult ured_sp.                      | 0 | 0 | Ammonibacillus_aga riperforans                               | 0 | 0 | ASV_20020                                               | 0.00 002 592 3 | 6.69 329 E-06 | Actinoplanes_sp.                                      | 0 | 0 | ASV_16467 | 0 | 0 | Alphaproteobacteria_ uncultured_eubacteriu m                 | 0 | 0 |
| Acidimicrobia_ uncult ured_Acidimicrobia            | 0 | 0 | Amnibacterium_sp.                                            | 0 | 0 | ASV_20022                                               | 0.00 002 592 3 | 6.69 329 E-06 | Actinotalea_sp.                                       | 0 | 0 | ASV_16643 | 0 | 0 | Alphaproteobacteria_ uncultured_gut__met agenome             | 0 | 0 |
| Acidimicrobia_ uncult ured_actinobacterium          | 0 | 0 | Amnipla_sp.                                                  | 0 | 0 | Acidimicrobia_ uncultu red_sp.                          | 1.94 423 E-05  | 5.01 998 E-06 | Actinotignum_sp.                                      | 0 | 0 | ASV_16667 | 0 | 0 | Alphaproteobacteria_ uncultured_Laciobacter ium_aquatile     | 0 | 0 |
| Acidimicrobia_ uncult ured_Actinomycetale s         | 0 | 0 | Amycolatopsis_sp.                                            | 0 | 0 | Arcicella_sp.                                           | 1.94 423 E-05  | 5.01 998 E-06 | Adhaeribacter__meta genome                            | 0 | 0 | ASV_16713 | 0 | 0 | Alphaproteobacteria_ uncultured_Novosphi ngobium             | 0 | 0 |
| Acidimicrobia_ uncult ured_bacterium_YC-ZSS-LKJ199  | 0 | 0 | Anaerobacterium_ un cultured_bacterium                       | 0 | 0 | ASV_21115                                               | 1.94 423 E-05  | 5.01 998 E-06 | Adhaeribacter__uncu ltured_soil                       | 0 | 0 | ASV_16736 | 0 | 0 | Alphaproteobacteria_ uncultured_Rhodospir illaceae_bacterium | 0 | 0 |
| Acidiphilium__ uncultu red_bacterium                | 0 | 0 | Anaerococcus_octavi us                                       | 0 | 0 | Chlamydiales_sp.                                        | 1.94 423 E-05  | 5.01 998 E-06 | Adhaeribacter_sp.                                     | 0 | 0 | ASV_16822 | 0 | 0 | Altererythrobacter_ alp ha__proteobacterium                  | 0 | 0 |
| Acidiphilium_sp.                                    | 0 | 0 | Anaerococcus_prevot ii                                       | 0 | 0 | Sulfuricurvum_sp.                                       | 1.94 423 E-05  | 5.01 998 E-06 | Aenigmarchaeales_s p.                                 | 0 | 0 | ASV_16866 | 0 | 0 | Altererythrobacter_sp.                                       | 0 | 0 |
| Acidisoma_sp.                                       | 0 | 0 | Anaerococcus_sp.                                             | 0 | 0 | Woesearchaeales_GW2011_GWC1.47_15_ uncultured_archae on | 1.90 192 E-05  | 4.91 074 E-06 | Aenigmarcheota_sp.                                    | 0 | 0 | ASV_16876 | 0 | 0 | Alysiella_sp.                                                | 0 | 0 |
| Acidithiobacillaceae_KCM-B-112_sp.                  | 0 | 0 | Anaerococcus_ uncult ured_bacterium                          | 0 | 0 | ASV_21851                                               | 1.29 615 E-05  | 3.34 664 E-06 | Aequorivita_sp.                                       | 0 | 0 | ASV_16882 | 0 | 0 | Alysiella_ uncultured_ bacterium                             | 0 | 0 |
| Acidithiobacillus_ ferr oxidans                     | 0 | 0 | Anaerococcusuncultu red_organism                             | 0 | 0 | Gammaproteobacteria_ uncultured__bacteriu m             | 1.29 615 E-05  | 3.34 664 E-06 | Aerococcaceae_sp.                                     | 0 | 0 | ASV_16940 | 0 | 0 | Amaricoccus_sp.                                              | 0 | 0 |
| Acidobacteria_bacteri um                            | 0 | 0 | Anaerocolumna_ uncult ured_bacterium                         | 0 | 0 | ASV_2180                                                | 6.48 076 E-06  | 1.67 333 E-06 | Aerococcaceae_ uncu ltured_bacterium                  | 0 | 0 | ASV_16946 | 0 | 0 | Amaricoccus_tamwort hensis                                   | 0 | 0 |

| Implant                              |                            |               |                                      |                            |                |                                      |                            |                |                                      |                            |                |                               |                            |                |                              |                            |                |
|--------------------------------------|----------------------------|---------------|--------------------------------------|----------------------------|----------------|--------------------------------------|----------------------------|----------------|--------------------------------------|----------------------------|----------------|-------------------------------|----------------------------|----------------|------------------------------|----------------------------|----------------|
| Assistant                            |                            |               | Environment                          |                            |                | Operator                             |                            |                | Patient                              |                            |                | Saliva                        |                            |                | Waterline                    |                            |                |
| Taxon ID                             | Mea n rela tive abu ndance | Std dev       | Taxon ID                             | Mea n rela tive abu ndance | Std dev        | Taxon ID                             | Mea n rela tive abu ndance | Std dev        | Taxon ID                             | Mea n rela tive abu ndance | Std dev        | Taxon ID                      | Mea n rela tive abu ndance | Std dev        | Taxon ID                     | Mea n rela tive abu ndance | Std dev        |
| Uncultured_Vulcanibac terium         | 0.4 981 289 5              | 0.0 812 1     | Uncultured_Vulcaniba cterium         | 0.51 205 435 5             | 0.03 145 270 8 | Uncultured_Vulcanib acterium         | 0.37 801 008 5             | 0.03 308 094 8 | Uncultured_Vulcanibac terium         | 0.46 793 617 5             | 0.03 320 851 7 | Rothia_aeria                  | 0.02 542 166 3             | 0.00 310 045 1 | Uncultured_Vulcanib acterium | 0.32 122 835 3             | 0.03 046 835 3 |
| Uncultured_Vulcanibact erium         | 0.4 161 596 3              | 0.0 257 319 9 | Uncultured_Vulcaniba cterium         | 0.46 797 693 2             | 0.02 692 099 9 | Uncultured_Vulcanib acterium         | 0.34 667 832 3             | 0.03 042 424 6 | Uncultured_Vulcanibac terium         | 0.40 125 175 7             | 0.02 358 167 7 | Prevotella_nigrescens         | 0.02 061 078 2             | 0.00 578 966 5 | Uncultured_Vulcanib acterium | 0.30 120 888 7             | 0.02 969 756 1 |
| Schlegellella_ uncultured _bacterium | 0.0 852 136 3              | 0.0 000 000 0 | Schlegellella_ unculture d_bacterium | 0.04 955 45                | 0              | Schlegellella_ uncultu red_bacterium | 0.04 621 071 5             | 0.00 958 153 3 | Schlegellella_ unculture d_bacterium | 0.01 692 529 8             | 0.00 217 529 8 | Solobacterium_moorei          | 0.00 992 383 1             | 0.00 119 318 3 | ASV_363                      | 0.03 073 387 7             | 0.00 613 513 2 |
| Cellvibrio_ uncultured_C ellvibrio   | 0.0 062 914 9              | 0.0 007 641 2 | Rhodococcus_ erythro polis           | 0.00 715 908 6             | 0              | Rhodococcus_ erythri opolis          | 0.01 040 738 4             | 0.00 116 285 5 | Rhodococcus_ erythrop olis           | 0.01 624 886 8             | 0.00 167 433 4 | Butyrivibrio_Eubacteriu m_sp. | 0.00 771 154               | 0.00 200 414 1 | ASV_366                      | 0.03 023 286 5             | 0.00 566 993 4 |

|                                            |            |            |                                                   |             |             |                                                |             |             |                                                   |             |             |                                          |             |             |                                                  |            |             |
|--------------------------------------------|------------|------------|---------------------------------------------------|-------------|-------------|------------------------------------------------|-------------|-------------|---------------------------------------------------|-------------|-------------|------------------------------------------|-------------|-------------|--------------------------------------------------|------------|-------------|
| Rhodococcus_erythropolis                   | 0.0038521  | 0.0000000  | ASV_363                                           | 0.005384657 | 0.000860771 | Methylobacterium_or_ganophilum                 | 0.008599509 | 0.002719404 | Cellvibrio_uncultured_Cellvibrio                  | 0.005035574 | 0.000574775 | ASV_292                                  | 0.004822044 | 0.000831838 | Schlegella_uncultured_bacterium                  | 0.02641167 | 0.004956664 |
| ASV_720                                    | 0.0051671  | 0.0008201  | Brevundimonas_diminuta                            | 0.005098239 | 0.000953258 | Solobacterium_mooriei                          | 0.008100413 | 0.001922327 | Saccharimonadalesuncultured_organism              | 0.004516243 | 0.001133779 | ASV_256                                  | 0.004636821 | 0.000811774 | Brevundimonas_diminuta                           | 0.00591973 | 0.000571455 |
| ASV_709                                    | 0.0046415  | 0.0007132  | Acetobacteraceae_uncultured_alpha_proteobacterium | 0.004833691 | 0.00115850  | ASV_709                                        | 0.00646412  | 0.00126219  | ASV_1161                                          | 0.00393194  | 0.000770518 | Leptotrichia_wadei                       | 0.00410933  | 0.00111308  | Obscuribacteraceae_sp.                           | 0.00560534 | 0.00177256  |
| ASV_2465                                   | 0.00037104 | 0.0011733  | ASV_1161                                          | 0.00435108  | 0.000583716 | ASV_720                                        | 0.00454393  | 0.00068384  | Rubellimicrobiumuncultured_Alphaproteobacteria    | 0.00388126  | 0.00122736  | ASV_2163                                 | 0.00321730  | 0.00101740  | Rhodococcus_erythropolis                         | 0.00484637 | 0.00054510  |
| ASV_2084                                   | 0.00037029 | 0.0011709  | ASV_366                                           | 0.00432456  | 0.00086223  | ASV_20325                                      | 0.00491400  | 0.00155394  | Brevundimonas_diminuta                            | 0.00356312  | 0.00037584  | ASV_1976                                 | 0.00321598  | 0.00086226  | ASV_211                                          | 0.00456333 | 0.00140854  |
| Brevundimonas_diminuta                     | 0.00395328 | 0.00056584 | Blattabacterium_uncultured_bacterium              | 0.00414550  | 0.00131092  | ASV_292                                        | 0.00472248  | 0.00060716  | Rothia_aeria                                      | 0.00355267  | 0.00091667  | Fusobacterium_necrophorum                | 0.00309640  | 0.00097916  | Denitratisoma_sp.                                | 0.00439700 | 0.00139045  |
| Acidimicrobia_uncultured_Acidimicrobia     | 0.00031328 | 0.00095928 | ASV_720                                           | 0.00410837  | 0.0007794   | ASV_256                                        | 0.00432012  | 0.00053940  | ASV_1208                                          | 0.00348418  | 0.00079890  | ASV_2250                                 | 0.00244274  | 0.00071024  | ASV_720                                          | 0.00372073 | 0.00050964  |
| uncultured_Anaeromyxobacter                | 0.00029218 | 0.0000000  | ASV_709                                           | 0.00380177  | 0.00071461  | ASV_366                                        | 0.00420710  | 0.00060342  | Acetobacteraceae_uncultured_alpha_proteobacterium | 0.00344408  | 0.00051557  | ASV_2802                                 | 0.00219050  | 0.00069269  | Paenidostiroidium_sp.                            | 0.0036056  | 0.00079424  |
| Lactobacillus_delbrueckii                  | 0.0026743  | 0.0008008  | Pseudoxanthomonas_taiwanensis                     | 0.00374711  | 0.00086429  | ASV_363                                        | 0.00405864  | 0.00063159  | ASV_4615                                          | 0.00319722  | 0.00101105  | Prevotella_intermedia                    | 0.00201152  | 0.00063610  | ASV_709                                          | 0.00345154 | 0.00046375  |
| Polyangium_sp.                             | 0.0020631  | 0.0008317  | ASV_4077                                          | 0.00366065  | 0.00115760  | Diplorickeetsiaceae_uncultured_sp.             | 0.00368550  | 0.00116545  | Sphingomonas_crusticola                           | 0.00288209  | 0.00091391  | Streptococcus_anginosus                  | 0.00200784  | 0.00058915  | Solobacterium_mooriei                            | 0.00339211 | 0.00057069  |
| Rhodanobacteraceae_uncultured_sp.          | 0.00024553 | 0.0000000  | Brevundimonas_alba                                | 0.00353079  | 0.00111653  | Patesobacteria_CP_R2_uncultured_bacterium      | 0.00368550  | 0.00116545  | ASV_720                                           | 0.00266812  | 0.00047057  | ASV_3085                                 | 0.00191669  | 0.00060611  | ASV_621                                          | 0.00266841 | 0.00084382  |
| Corynebacterium_aurimucosum                | 0.00024553 | 0.0007579  | Clostridia_UCG-014_unidentified                   | 0.00353079  | 0.00111653  | Rickettsia_sp.                                 | 0.00368550  | 0.00116545  | ASV_2692                                          | 0.00246642  | 0.00077995  | Treponema_lectithinolyticum              | 0.00181213  | 0.00033369  | Desulfomonile_uncultured_delta                   | 0.0025988  | 0.00082175  |
| Psychrobacter_sanguinis                    | 0.00023874 | 0.0000000  | ASV_1642                                          | 0.00332712  | 0.00086342  | Thermobacillus_sp.                             | 0.00368550  | 0.00116545  | ASV_2103                                          | 0.00220602  | 0.00044920  | Peptococcus_sp.                          | 0.00178191  | 0.00022153  | ASV_1161                                         | 0.00256164 | 0.000341    |
| Oligoflexales_uncultured_soil              | 0.00023523 | 0.0000318  | ASV_292                                           | 0.00249202  | 0.00078804  | Brevundimonas_diminuta                         | 0.00352139  | 0.00052373  | ASV_6343                                          | 0.00218340  | 0.00069646  | ASV_305                                  | 0.00174172  | 0.00055078  | ASV_4322                                         | 0.00250900 | 0.00076939  |
| Rarobacter_faecitabidus                    | 0.00023021 | 0.0000000  | ASV_8009                                          | 0.00226067  | 0.00093567  | Parcubacteria_group                            | 0.00325102  | 0.00107782  | Desulfovermiculus_sp.                             | 0.00218340  | 0.00069646  | Anaerovoracaceae_Family_XIII_UCG-001_sp. | 0.00172631  | 0.00032151  | Chloroplast_Melosira_varians                     | 0.00231206 | 0.00070492  |
| ASV_5051                                   | 0.00022148 | 0.0000303  | Scoytonema_UTEX_2349_sp.                          | 0.00222087  | 0.00094003  | Actinobacteria_uncultured_metagenome           | 0.00303358  | 0.00095936  | ASV_709                                           | 0.00214640  | 0.00022706  | Alloscardovia_omnicolors                 | 0.00149640  | 0.00029135  | Cloacibacterium_sp.                              | 0.00226535 | 0.00067609  |
| Chryseobacterium_gregarium                 | 0.00022143 | 0.0000254  | ASV_5961                                          | 0.00219298  | 0.00069348  | Negativibacillus_uncultured_bacterium          | 0.00256299  | 0.00081269  | Lawsonella_uncultured_bacterium                   | 0.00210683  | 0.00044425  | Anaerovoracaceae_Family_XIII_UCG-002_sp. | 0.00149576  | 0.00023492  | Dysgonomonadaceae_uncultured_bacterium           | 0.00214807 | 0.00067928  |
| ASV_6823                                   | 0.00021881 | 0.0000691  | ASV_6381                                          | 0.00216337  | 0.00068412  | ASV_21995                                      | 0.00245700  | 0.00077697  | Megamonasuncultured_organism                      | 0.00209209  | 0.00068283  | Lactobacillus_kalixensis                 | 0.00147174  | 0.00046540  | Rothia_aeria                                     | 0.00203784 | 0.0008722   |
| ASV_6826                                   | 0.00021881 | 0.0000691  | Lawsonella_uncultured_bacterium                   | 0.00203047  | 0.00064723  | Deinococcus_antarcticus                        | 0.00245700  | 0.00077697  | ASV_366                                           | 0.00208630  | 0.00041448  | Prevotella_baroniae                      | 0.00134171  | 0.00033698  | ASV_7836                                         | 0.00203314 | 0.0002935   |
| Blastopirellula_sp.                        | 0.00021881 | 0.0000691  | Chthoniobacter_metagenome                         | 0.00199362  | 0.00063043  | Parcubacteria_sp.                              | 0.00245700  | 0.00077697  | Chloroplast_Cinnamomum_camphora                   | 0.00200968  | 0.00063551  | Mycoplasmataceae_genomosp.               | 0.00129938  | 0.00041090  | ASV_10253                                        | 0.00200486 | 0.00063399  |
| Alphaproteobacteria_uncultured_eubacterium | 0.00021257 | 0.0000683  | Cellvibrio_uncultured_Cellvibrio                  | 0.00195946  | 0.00037364  | ASV_1161                                       | 0.00225891  | 0.00057307  | Lactobacillus_senioris                            | 0.00200968  | 0.00063551  | Actinomycetaceae_F0332unidentified       | 0.00128681  | 0.00028276  | Desulfocapsaceae_sp.                             | 0.00200486 | 0.00063399  |
| Fibrobacteraceae_uncultured_Juncus_effusus | 0.00020993 | 0.00006423 | ASV_8569                                          | 0.00186547  | 0.00058991  | ASV_5337                                       | 0.00216684  | 0.00068521  | uncultured_Chloroflexi                            | 0.00194063  | 0.00061368  | Leptotrichia_buccalis                    | 0.00124034  | 0.00039223  | Kaistia_uncultured_bacterium                     | 0.00200486 | 0.00063399  |
| NKB15_uncultured_bacterium                 | 0.00020930 | 0.00006618 | Paenidostiroidium_sp.                             | 0.00186547  | 0.00058991  | Bacteroidales_sp.                              | 0.00209461  | 0.00066237  | ASV_363                                           | 0.00192729  | 0.00042179  | ASV_346                                  | 0.00123026  | 0.00038904  | Pedospaeraceae_S_H3-11uncultured_verucumicrobium | 0.00186166 | 0.00058871  |
| Hypnocyclus_uncultured_bacterium           | 0.00020930 | 0.00006618 | alphaproteobacteria_uncultured_bacterium          | 0.00173070  | 0.00054729  | SBR1031_uncultured_Gemmatimonadetes            | 0.00209461  | 0.00066237  | ASV_3228                                          | 0.00182461  | 0.00057774  | Corynebacterium_durum                    | 0.00106590  | 0.00013955  | Pseudoxanthomonas_Xanthomonas_sp.                | 0.00182982 | 0.00057864  |
| Diplorickeetsia_uncultured_bacterium       | 0.00020930 | 0.00006618 | ASV_1760                                          | 0.00170154  | 0.00041213  | Prevotellaceae_UCG-004uncultured_Bacteroidales | 0.00202239  | 0.00063953  | ASV_7992                                          | 0.00178665  | 0.00056495  | Treponema_denticola                      | 0.00100648  | 0.00019145  | ASV_292                                          | 0.00181989 | 0.00036240  |
| Oligella_sp.                               | 0.00019027 | 0.00006017 | Coprococcus_metagenome                            | 0.00164729  | 0.00052092  | Fodinicurvataceae_uncultured_Rhodospirillaceae | 0.00201889  | 0.00063843  | ASV_8075                                          | 0.00173563  | 0.00054885  | Selenomonas_Veillonellaceae_bacterium    | 0.00099246  | 0.00031384  | Simkaniaceae_uncultured_Candidatus               | 0.00181250 | 0.00057316  |
| Brevibacillus_sp.                          | 0.00018987 | 0.00005912 | Clostridium_sensu_stricto_1_human_gut             | 0.00164416  | 0.00051993  | Oxalobacteraceae_CMIT08_sp.                    | 0.00199730  | 0.00061521  | bacterium                                         | 0.00158125  | 0.00050003  | Ottowia_sp.                              | 0.00083625  | 0.00026444  | Oligoflexales_uncultured_soil                    | 0.00176751 | 0.00030990  |
| Halomonas_uncultured_soil                  | 0.00018032 | 0.00004814 | Chelatococcus_sp.                                 | 0.00163335  | 0.00051051  | ASV_3419                                       | 0.00197851  | 0.00062566  | Anaerolineaceae_uncultured_Bellilinea             | 0.00157433  | 0.00049849  | Enterococcus_faecium                     | 0.00082144  | 0.00025976  | Salinicola_sp.                                   | 0.00176334 | 0.00055761  |
| Lawsonella_sp.                             | 0.00018032 | 0.00004814 | Gemmatimonas_phototrophica                        | 0.00149521  | 0.00048287  | Exiguobacterium_sp.                            | 0.00197225  | 0.00062368  | Candidatus_Nitrotoga_sp.                          | 0.00157049  | 0.0004912   | Streptococcus_mutans                     | 0.00074020  | 0.00020798  | Edaphobaculum_uncultured_Chitinophagaceae        | 0.00176175 | 0.00055274  |
| Paenibacillaceae_uncultured_bacterium      | 0.00018032 | 0.00004814 | MND1uncultured_Burkholderiales                    | 0.00147109  | 0.00046520  | Cloacibacterium_sp.                            | 0.00194985  | 0.00061659  | Methylomonadaceae_sp.                             | 0.00147594  | 0.00046673  | Lachnoanaerobaculum_uncultured_bacterium | 0.00073515  | 0.00023247  | ASV_144                                          | 0.00167824 | 0.00053073  |

|                                                    |             |             |                                                    |             |             |                                                       |                |             |                                                  |               |             |                                                     |             |              |                                                  |             |             |
|----------------------------------------------------|-------------|-------------|----------------------------------------------------|-------------|-------------|-------------------------------------------------------|----------------|-------------|--------------------------------------------------|---------------|-------------|-----------------------------------------------------|-------------|--------------|--------------------------------------------------|-------------|-------------|
| Rhodobacter_uncultured_bacterium                   | 0.00170532  | 0.0000000   | Sphingomonadaceae_Ellin6055_sp.                    | 0.001395534 | 0           | NB1-j_sp.                                             | 0.00180575932  | 0.000571086 | Globicatella_uncultured_bacterium                | 0.001437504   | 0.000454579 | Porphyromonas_catoniae                              | 0.000569306 | 0.000119306  | ASV_9468                                         | 0.001626512 | 0.000514348 |
| ASV_8087                                           | 0.000168291 | 0.000053218 | Candidatus_Wolfebacteria_uncultured_Microgenomates | 0.001373087 | 0.000434208 | ASV_6329                                              | 0.001800575706 | 0.000571014 | TG3_uncultured_Chitinivibronia                   | 0.00141044601 | 0.000446019 | Neisseria_oralis                                    | 0.000551369 | 0.000174358  | Butyrivibrio_Eubacterium_sp.                     | 0.001609662 | 0.000509021 |
| Blastocatellaceae_uncultured_metagenome            | 0.000160200 | 0.000051233 | Hydrogenispora_uncultured_bacterium                | 0.001373087 | 0.000434208 | ASV_2390                                              | 0.001740099    | 0.000499446 | Coldixtribacter_uncultured_rumen                 | 0.001371375   | 0.000435618 | Anaerovoracaceae_Family_XIII_UCG-004Eubacterium_sp. | 0.000530249 | 8.71E-05     | Acetobacteraceae_uncultured_alpha_protobacterium | 0.001513459 | 0.000239633 |
| Oceanobacter_uncultured_bacterium                  | 0.000160200 | 0.000051233 | ASV_3161                                           | 0.001373087 | 0.000434208 | Staphylococcus_pettenkoferi                           | 0.00173729     | 0.00054938  | Ohtaekwangia_uncultured_Bacteroidetes            | 0.001371375   | 0.000435618 | Anaeroglobus_uncultured_organism                    | 0.000477853 | 0.00015111   | Singulisphaera_Isosphaera_sp.                    | 0.00151042  | 0.000477637 |
| Rufibacter_sp.                                     | 0.000160200 | 0.000051233 | ASV_2285                                           | 0.001280407 | 0.000720705 | Marinagarivorans_gammaproteobacterium                 | 0.00173647     | 0.00054912  | Pedosphaeraceae_Adurobin063-1_sp.                | 0.001371375   | 0.000435618 | Bulleidia_extracta                                  | 0.000461903 | 0.00010131   | Mucilagibacter_myungsuensis                      | 0.00148698  | 0.000470227 |
| Paenibacillus_rigui                                | 0.00015919  | 0.000050342 | ASV_3021                                           | 0.001280407 | 0.000720705 | Gottschalkia_uncultured_bacterium                     | 0.001733478    | 0.00054817  | VHS-B3-70_sp.                                    | 0.001274509   | 0.000409153 | Prevotella_micans                                   | 0.00043896  | 0.00043705   | Hydrogenispora_uncultured_Firmicutes             | 0.00143245  | 0.00025854  |
| Cyclobacteriaceae_uncultured_bacterium             | 0.00015003  | 0.00003778  | ASV_10821                                          | 0.00124039  | 0.000930498 | ASV_1208                                              | 0.00171059     | 0.00035266  | Caulobacter_metagenome                           | 0.00122122    | 0.00038038  | Anaerovoracaceae_Family_XIII_UCG-003_sp.            | 0.00042042  | 0.00013013   | Methylomirabilaceae_MIZ17_uncultured_bacterium   | 0.00142319  | 0.00005045  |
| Megamonasuncultured_organism                       | 0.00015003  | 0.00003778  | Diploickettsiaceae_uncultured_Legionellales        | 0.00121038  | 0.000149310 | Candidatus_Ovatubacterium_gammaproteobacterium        | 0.001686056    | 0.000533178 | Rhodoluna_uncultured_actinobacterium             | 0.00122068    | 0.00038038  | Clostridia_vadinBB60_group.Clostridiales_bacterium  | 0.00046056  | 9.45E-05     | Alkalibacterium_uncultured_bacterium             | 0.00139144  | 0.00021022  |
| ASV_8378                                           | 0.00015003  | 0.00003778  | Clostridium_sensu_stricto_12_sp.                   | 0.00117037  | 0.000693212 | Hydrocarboniphaga_sp.                                 | 0.00166125     | 0.00052533  | ASV_10814                                        | 0.00122037    | 0.00038655  | Paludibacteraceae_F0058_uncultured_bacterium        | 0.000390224 | 0.00012403   | Shinella_sp.                                     | 0.00133287  | 0.00032266  |
| Cyclobacteriaceae_uncultured_Sphingobacteriales    | 0.00015003  | 0.00003778  | Comamonas_sp.                                      | 0.00117037  | 0.000693212 | Isosphaeraceae_uncultured_Isosphaera_sp.              | 0.00165051     | 0.00052351  | Gemmatimonas_uncultured_bacterium                | 0.00122037    | 0.00038655  | Cryptobacterium_sp.                                 | 0.00038946  | 0.00025E-05  | Oscillospiraceae_uncultured_rumen                | 0.00128040  | 0.00040756  |
| Acetobacteraceae_uncultured_alpha_proteobacterium  | 0.00015003  | 0.00003778  | Finexgolia_uncultured_bacterium                    | 0.00115036  | 0.000295459 | Rothia_aeria                                          | 0.00159205     | 0.00034326  | ASV_3531                                         | 0.00118118    | 0.00037553  | Metamycoplasma_salivarium                           | 0.00036011  | 0.00026449   | ASV_4353                                         | 0.00126599  | 0.00035011  |
| ASV_1208                                           | 0.00014054  | 0.00003031  | Gammaproteobacteria_JTB23_metagenome               | 0.00115036  | 0.000295459 | ASV_4250                                              | 0.00153436     | 0.00048520  | Bacteroidales_p-251-o5_uncultured_bacterium      | 0.00118075    | 0.00038337  | Bacilli_RF39_Firmicutes_oral                        | 0.00035011  | 0.0003654    | ASV_256                                          | 0.00122240  | 0.00029146  |
| Rubinisphaeraceae_SH-PL14_uncultured_planctomycete | 0.00014054  | 0.00003031  | Clostridioides_sp.                                 | 0.00109649  | 0.00037411  | Aquisphaera_uncultured_bacterium                      | 0.00151745     | 0.00047986  | ASV_2390                                         | 0.00115018    | 0.00024525  | Actinomycetaceae_F0332_uncultured_bacterium         | 0.00035131  | 0.00038E-05  | Oscillospiraceae_UCG-003_sp.                     | 0.00120338  | 0.00015278  |
| Agromyces_sp.                                      | 0.00014054  | 0.00003031  | Sphaerotilus_natans                                | 0.00109649  | 0.00037411  | Hungateiclostridiaceae_HN-HFD106_uncultured_bacterium | 0.00151745     | 0.00047986  | ASV_11002                                        | 0.00113113    | 0.00035035  | Porphyromonas_gingivalis                            | 0.00035011  | 0.0002837    | Actinobacillus_sp.                               | 0.00115036  | 0.00036056  |
| ASV_9779                                           | 0.00014054  | 0.00003031  | Streptococcus_mutans                               | 0.00109649  | 0.00037411  | ASV_3544                                              | 0.00151745     | 0.00047986  | Rhizobiales_Incertae_Sedis_uncultured_metagenome | 0.00113113    | 0.00035035  | Eggerthia_catenaformis                              | 0.00034010  | 0.0002892    | ASV_164                                          | 0.00114120  | 0.00036088  |
| ASV_9780                                           | 0.00014054  | 0.00003031  | Vicinibacteria_uncultured_Acidobacteriales_S       | 0.00109649  | 0.00037411  | Uliginosibacterium_uncultured_bacterium               | 0.00145045     | 0.00045907  | ASV_3716                                         | 0.00109761    | 0.00034709  | Lachnospiraebaculum_sp.                             | 0.00033062  | 0.0004619    | ASV_3349                                         | 0.00111368  | 0.00035217  |
| Roseococcus_sp.                                    | 0.00014054  | 0.00003031  | Beijerinckiacae_FukuN57_uncultured_bacterium       | 0.00105033  | 0.00068742  | ASV_2510                                              | 0.00144456     | 0.00045681  | Anaerolineaceae_sp.                              | 0.00104803    | 0.00033141  | Campylobacter_concisus                              | 0.00032032  | 0.0003805    | ASV_5066                                         | 0.00110311  | 0.00031958  |
| ASV_5386                                           | 0.00013013  | 0.00003031  | FCPU426uncultured_microorganism                    | 0.00105033  | 0.00068742  | Coriobacteria_OPB41_uncultured_bacterium              | 0.00144456     | 0.00045681  | ASV_3568                                         | 0.00104803    | 0.00033141  | Absconditibacteriales_(SR1)_SR1_bacterium           | 0.00029029  | 0.000381E-05 | Anaerolineaceae_uncultured_eubacterium           | 0.00107333  | 0.00033960  |
| Auranisilimonas_Terrimonas_sp.                     | 0.00013013  | 0.00003031  | Solobacterium_moorei                               | 0.00100100  | 0.000479    | Frankiales_sp.                                        | 0.00144456     | 0.00045681  | Limnobacter_sp.                                  | 0.00103432    | 0.00032708  | ASV_366                                             | 0.00027132  | 6.10E-05     | Babeliales_UBA12409_metagenome                   | 0.00106613  | 0.00033714  |
| Pseudomonas_bioreactor_metagenome                  | 0.00013013  | 0.00003031  | ASV_8590                                           | 0.00098031  | 0.00077014  | Lawsonella_uncultured_bacterium                       | 0.00143464     | 0.00031448  | Saprospiraceae_OLB8_sp.                          | 0.00103432    | 0.00032708  | Prevotella_maculosa                                 | 0.00027121  | 8.57E-05     | Amb-16S-1323_uncultured_bacterium                | 0.00104272  | 0.00022116  |
| Desemzia_sp.                                       | 0.00013013  | 0.00003031  | Kribbella_sp.                                      | 0.00098031  | 0.00077014  | Rhodospirillales_uncultured_Rhodospirillales          | 0.00142818     | 0.00045163  | Sporichthyaceae_hgcl_clade_marine_metagenome     | 0.00103432    | 0.00032708  | Amnippila_sp.                                       | 0.00025188  | 7.96E-05     | Kocuria_marina                                   | 0.00100632  | 0.00017450  |
| Klenkia_sp.                                        | 0.00013013  | 0.00003031  | Sphingomonas_groudwater_metagenome                 | 0.00098031  | 0.00077014  | Staphylococcus_vitulinus                              | 0.00137137     | 0.00043285  | Bacteroidetes_BD2-2_uncultured_organism          | 0.00100625    | 0.00031820  | Aggregatibacter_actinomycetecomitans                | 0.00024881  | 7.86E-05     | Propionibacteriaceae_uncultured_Actinomycetales  | 0.00102088  | 0.00023283  |
| Corynebacterium_amycolatum                         | 0.00013013  | 0.00003031  | Candidatus_Kerfeldbacteria_Parcubacteria_group     | 0.00095030  | 0.000188101 | Gemmataceae_uncultured_Plantomycetaceae               | 0.00134884     | 0.00042654  | ASV_1837                                         | 0.00097884    | 0.00026099  | ASV_6                                               | 0.00023437  | 6.93E-05     | ASV_13503                                        | 0.00101657  | 0.00032146  |
| Actinotignum_sp.                                   | 0.00012012  | 0.00004789  | ASV_1208                                           | 0.00094019  | 0.000257154 | Oligoflexia_0319-6G20_uncultured_deita                | 0.00134884     | 0.00042654  | SphingobiumSphingobium_sufflavum                 | 0.00096884    | 0.00030069  | Tannerella_forsythia                                | 0.00022972  | 5.07E-05     | Acidothermus_uncultured_bacterium                | 0.00100926  | 0.00015915  |
| Clostridium_sensu_stricto_1_uncultured_Clostridia  | 0.00012012  | 0.00004789  | ASV_14447                                          | 0.00093029  | 0.000273495 | Megamonasuncultured_organism                          | 0.00129129     | 0.00038668  | Blastocatellaceae_uncultured_Acidobacteria       | 0.00094094    | 0.00029793  | Cardiobacterium_uncultured_bacterium                | 0.00022065  | 6.97E-05     | Leeia_uncultured_bacterium                       | 0.00100243  | 0.00031699  |
| Sphingobacterium_uncultured_bacterium              | 0.00012012  | 0.00004789  | Dongia_rigui                                       | 0.00091028  | 0.00051694  | ASV_3560                                              | 0.00129209     | 0.00040859  | Anaerolineaceae_uncultured_sludge                | 0.00094094    | 0.00029793  | Anaerovoracaceae_Family_XIII_UCG-005Eubacterium_sp. | 0.00020020  | 4.43E-05     | Nitrosomonadaceae_IS-44_sp.                      | 0.00100243  | 0.00031699  |
| ASV_2303                                           | 0.00012012  | 0.00004789  | Tepidimonas_sp.                                    | 0.00091028  | 0.00051694  | ASV_5010                                              | 0.00129209     | 0.00040859  | Pseudorhodobacterium_etagenome                   | 0.00094094    | 0.00029793  | Prevotella_pleuritidis                              | 0.00020020  | 6.49E-05     | Treponema_uncultured_bacterium                   | 0.00100243  | 0.00031699  |
| Spirosoma_arcticum                                 | 0.00011000  | 0.00000937  | Pir4_lineage_sp.                                   | 0.00086027  | 0.000535364 | ASV_1592                                              | 0.00128128     | 0.00037037  | Neisseria_uncultured_bacterium                   | 0.00091931    | 0.00029071  | Murdochella_uncultured_bacterium                    | 0.00019019  | 6.11E-05     | Thermomicrobiales_JG30-KF-CM45bacterium_QTYC46b  | 0.00099099  | 0.00031132  |
| Allivibrio_sp.                                     | 0.00011000  | 0.00000937  | Trichococcus_sp.                                   | 0.00086027  | 0.000535364 | ASV_8346                                              | 0.00122415     | 0.00038712  | Pedobacter_composti                              | 0.00088415    | 0.0002856   | Treponema_socranskii                                | 0.00019019  | 6.11E-05     | ASV_3639                                         | 0.00098027  | 0.00031015  |
| Lawsonella_uncultured_bacterium                    | 0.00011000  | 0.00000937  | ASV_2061                                           | 0.00085014  | 0.000241808 | bacterium_YT0326                                      | 0.00121133     | 0.00038305  | Rokubacteriales_sp.                              | 0.00088415    | 0.0002856   | Kingella_sp.                                        | 0.00018018  | 5.81E-05     | Monoglobus_sp.                                   | 0.00092027  | 0.00038443  |

|                                       |            |            |                                                   |            |            |                                                    |            |            |                                                           |            |            |                                        |            |             |                                                           |            |            |
|---------------------------------------|------------|------------|---------------------------------------------------|------------|------------|----------------------------------------------------|------------|------------|-----------------------------------------------------------|------------|------------|----------------------------------------|------------|-------------|-----------------------------------------------------------|------------|------------|
| Candidatus_Planktophilum_13325        | 0.00113325 | 0.00035837 | Cutibacterium_granulosum                          | 0.00084744 | 0.00024156 | Bacillus_thermofaciens                             | 0.00118080 | 0.00037340 | Syntrophus_sp.                                            | 0.00088556 | 0.00028004 | ASV_2084                               | 0.00181081 | 5.71775E-05 | ASV_12634                                                 | 0.00090871 | 0.00028736 |
| Sediment_bacterium_13325              | 0.00113325 | 0.00000000 | Jeotgalbaca_sp.                                   | 0.00082364 | 0.00026046 | Roseomonas_genospecies                             | 0.00117096 | 0.00037029 | Acidimicrobia_IMCC26256uncultured_Actinomycetales         | 0.00086250 | 0.00027274 | ASV_363                                | 0.00017334 | 3.65867E-05 | ASV_2692                                                  | 0.00087575 | 0.00027693 |
| Rokubacteriales_WX65_1899             | 0.00111899 | 0.00000000 | Clostridium_sensu_stricto_1_metagenome            | 0.00079744 | 0.00025217 | Sphingomonas_oligoaromativorans                    | 0.00115614 | 0.00036560 | ASV_13859                                                 | 0.00084626 | 0.00026761 | Filifactor_alocis                      | 0.00017113 | 5.4117E-05  | ASV_6828                                                  | 0.00087575 | 0.00027693 |
| Megamonas_10846                       | 0.00111084 | 0.00035056 | Fimbrigliobus_10846                               | 0.00079744 | 0.00025217 | Clostridium_sensu_stricto_8_10846                  | 0.00115565 | 0.00036544 | Burkholderiales_A21b_10846                                | 0.00084626 | 0.00026761 | Mogibacterium_timidum                  | 0.00016974 | 3.77355E-05 | Leptotrichia_wadei                                        | 0.00086538 | 0.00027376 |
| Cryobacterium_sp.                     | 0.00111074 | 0.00035022 | Solirubrobacteraceae_1074                         | 0.00078462 | 0          | Lactobacillus_iners                                | 0.00112949 | 0.00031793 | Chloroplast_Vischeria_sp.                                 | 0.00084626 | 0.00026761 | Pseudopropionibacterium_sp.            | 0.00016963 | 4.62501E-05 | ASV_7664                                                  | 0.00086518 | 0.00027587 |
| ASV_1592                              | 0.00111054 | 0.00020451 | ASV_14325                                         | 0.00077881 | 0.0002463  | Oligoflexales_uncultured_soil                      | 0.00112228 | 0.00031441 | Planctopirus_sp.                                          | 0.00084626 | 0.00026761 | Tannerella_sp.                         | 0.00015958 | 5.0149E-05  | Actinotalea_sp.                                           | 0.00085923 | 0.00027172 |
| ASV_363                               | 0.00111017 | 0.00023455 | Candidatus_Roizmanbacteria                        | 0.00077881 | 0.0002463  | Acidobacteriales_Elev-16S-1166_sp.                 | 0.00111134 | 0.00035143 | Spirochaetaceae_uncultured_Spiroplasma_culicis            | 0.00084626 | 0.00026761 | Oribacterium_parvum                    | 0.00015821 | 5.00304E-05 | Candidatus_Staskawiczbacteria                             | 0.00085923 | 0.00027172 |
| Arcticobacter_sp.                     | 0.00110746 | 0.00033986 | Fermentomonas_sp.                                 | 0.00077111 | 0.00024384 | Beggiatoaceae_sp.                                  | 0.00109020 | 0.00034475 | Prevotellaceae_bacterium                                  | 0.00082026 | 0.00032321 | Leptotrichia_hofstadii                 | 0.00014914 | 3.81951E-05 | Eubacterium_nodatum_group_sp.                             | 0.00085923 | 0.00027172 |
| ASV_1901                              | 0.00110628 | 0.00033611 | ASV_3986                                          | 0.00073779 | 0.0002351  | Paenidictyodermium_sp.                             | 0.00109020 | 0.00034475 | ASV_256                                                   | 0.00082026 | 0.00032321 | Fretibacterium_sp.                     | 0.00014703 | 4.64956E-05 | Flectobacillus_sp.                                        | 0.00085923 | 0.00027172 |
| Ulvibacter_1028                       | 0.00110628 | 0.00033611 | Clostridium_sensu_stricto_9uncultured_Clostridium | 0.00072546 | 0.00022941 | Desulfobacterota_uncultured_delta_proteobacterium  | 0.00108813 | 0.0003441  | Oligoflexales_uncultured_d_sp.                            | 0.00079458 | 0.0002365  | Olsenella_sp.                          | 0.00014703 | 4.64956E-05 | Geobacter_sp.                                             | 0.00085923 | 0.00027172 |
| Aquicella_unidentified                | 0.00110100 | 0.00033092 | Ferruginibacter_metagenome                        | 0.00072546 | 0.00022941 | Actinomyces_israelii                               | 0.00108813 | 0.0003441  | Aeromonas_uncultured_gamma                                | 0.00078716 | 0.00024924 | Alloprevotella_tannerae                | 0.00014393 | 4.55159E-05 | Ruminococcaceae_sp.                                       | 0.00085923 | 0.00027172 |
| Chlamydiales_sp.                      | 0.00110010 | 0.00033092 | Mariniflavobacterium_uncultured_sp.               | 0.00072546 | 0.00022941 | MidBa8_sp.                                         | 0.00108813 | 0.0003441  | Graulobacterium_aerophilum                                | 0.00078716 | 0.00024924 | Prevotella_melaninogenica              | 0.00013690 | 4.32938E-05 | ASV_5713                                                  | 0.00083768 | 0.00026489 |
| Thermobacillus_uncultured_red_compost | 0.00110010 | 0.00033092 | Gammaproteobacteria_JG36-TZT-191_metagenome       | 0.00069776 | 0.00022065 | ASV_2249                                           | 0.00105788 | 0.00032462 | Modestobacter_sp.                                         | 0.00078716 | 0.00024924 | Kingella_uncultured_bacterium          | 0.00013230 | 4.18382E-05 | Haliaceae_OM60(N-OR5)_cladeuncultured_d_Oceanospirillales | 0.00083768 | 0.00026489 |
| ASV_9969                              | 0.00110010 | 0.00033092 | Salinispira_sp.                                   | 0.00069776 | 0.00022065 | Acetobacteraceae_uncultured_alpha_protobacterium   | 0.00104188 | 0.00032947 | Sphingomonas_fonticola                                    | 0.00078716 | 0.00024924 | ASV_2285                               | 0.00012594 | 3.98264E-05 | Anaerobacterium_uncultured_bacterium                      | 0.00083768 | 0.00026489 |
| Dietzia_sp.                           | 0.00110010 | 0.00033092 | ASV_2386                                          | 0.00069776 | 0.00022065 | ASV_9967                                           | 0.00104188 | 0.00032947 | Leeia_uncultured_bacterium                                | 0.00078716 | 0.00024924 | Desulfomicrobium_orale                 | 0.00012440 | 3.93416E-05 | Pseudodavibacter_sp.                                      | 0.00083768 | 0.00026489 |
| oc32_sp.                              | 0.00110010 | 0.00033092 | ASV_15306                                         | 0.00069776 | 0.00022065 | Propionimonomas_metagenome                         | 0.00102102 | 0.00032259 | Planctomycetales_uncultured_sp.                           | 0.00078716 | 0.00024924 | ASV_476                                | 0.00011893 | 3.76118E-05 | ASV_2820                                                  | 0.00081348 | 0.00026724 |
| Cutibacterium_granulosum              | 0.00109973 | 0.00032426 | ASV_4353                                          | 0.00069776 | 0.00022065 | Babeliaceaeuncultured_organism                     | 0.00101163 | 0.00031990 | ASV_14847                                                 | 0.00078716 | 0.00024924 | Fretibacterium_Synergistales_bacterium | 0.00011893 | 3.76118E-05 | Caldicellulosiruptor_sp.                                  | 0.00081348 | 0.00026724 |
| Hydrogenophilus_sp.                   | 0.00109973 | 0.00032426 | Fibrobacteraceae_uncultured_bacterium             | 0.00069776 | 0.00022065 | Berkeleibacterium_uncultured_Epsilonproteobacteria | 0.00101163 | 0.00031990 | Saccharimonadalesuncultured_Sphingobium                   | 0.00078716 | 0.00024924 | Leptotrichia_unidentified              | 0.00011893 | 3.76118E-05 | Candidatus_Collieraeriauncultured_Aerolineales            | 0.00081348 | 0.00026724 |
| ASV_12391                             | 0.00109973 | 0.00032426 | Ignatzschineria_sp.                               | 0.00069776 | 0.00022065 | Desulfobacterota_uncultured_sp.                    | 0.00101163 | 0.00031990 | Anaerococcus_uncultured_bacterium                         | 0.00078716 | 0.00024924 | Pasteurellaceae_sp.                    | 0.00011893 | 3.24703E-05 | Clostridioides_sp.                                        | 0.00081348 | 0.00026724 |
| ASV_12397                             | 0.00109973 | 0.00032426 | Spirosoma_litoris                                 | 0.00069776 | 0          | Stenotrophobacterium_uncultured_bacterium          | 0.00101163 | 0.00031990 | ASV_292                                                   | 0.00078716 | 0.00024924 | WolinellaWolinella_sp.                 | 0.00011893 | 3.0599E-05  | ASV_2390                                                  | 0.00081348 | 0.00026724 |
| Megamonas_hypermergale                | 0.00109973 | 0.00032426 | ASV_15881                                         | 0.00069776 | 0.00022065 | Luteitalea_uncultured_bacterium                    | 0.00100944 | 0.00031921 | Terrisporobacter_sp.                                      | 0.00078716 | 0.00024924 | Cardiobacterium_sp.                    | 0.00011893 | 2.79113E-05 | Afipia_sp.                                                | 0.00081348 | 0.00026724 |
| Vitreoscilla_sp.                      | 0.00109973 | 0.00032426 | Sphingomonas_solii                                | 0.00069776 | 0          | Candidatus_Omnitrophusuncultured_organism          | 0.00100944 | 0.00031921 | Pelotomaculum_sp.                                         | 0.00078716 | 0.00024924 | Butyrivibrio_Firmicutes_oral           | 0.00011893 | 2.62277E-05 | Rhodanobacter_uncultured_Rudaea                           | 0.00081348 | 0.00026724 |
| Deinococcus_aquatilis                 | 0.00109973 | 0.00032426 | ASV_2850                                          | 0.00066521 | 0.00016221 | Paenibacillus_hordei                               | 0.00093896 | 0.00029692 | Pseudoglutamicibacter_sp.                                 | 0.00078716 | 0.00024924 | Butyrivibrio_unidentified              | 0.00011893 | 2.62277E-05 | ASV_2622                                                  | 0.00081348 | 0.00026724 |
| Kocuria_marina                        | 0.00109973 | 0.00032426 | ASV_2888                                          | 0.00066521 | 0.00016221 | Shinella_sp.                                       | 0.00093896 | 0.00029692 | Anaerotruncum_lactifermentans                             | 0.00078716 | 0.00024924 | Actinomyces_israelii                   | 0.00011893 | 2.46679E-05 | Acholeplasma_axanthum                                     | 0.00081348 | 0.00026724 |
| ASV_13191                             | 0.00109973 | 0.00032426 | ASV_2910                                          | 0.00066521 | 0.00016221 | Butyrivibrio_Eubacterium_sp.                       | 0.00093896 | 0.00029692 | Blastomonas_sp.                                           | 0.00078716 | 0.00024924 | Neisseriaceae_sp.                      | 0.00011893 | 2.32478E-05 | Chitinophagales_37-13_uncultured_Bacteroidetes            | 0.00081348 | 0.00026724 |
| ASV_13193                             | 0.00109973 | 0.00032426 | Methylobacterium_komagatae                        | 0.00066521 | 0.00016221 | Prevotella_colorans                                | 0.00093896 | 0.00029692 | Lactobacillus_helveticus                                  | 0.00078716 | 0.00024924 | Paludibacteraceae_F0058_sp.            | 0.00011893 | 2.27007E-05 | Lawsonella_uncultured_bacterium                           | 0.00081348 | 0.00026724 |
| Limnohabitans_sp.                     | 0.00109973 | 0.00032426 | ASV_2303                                          | 0.00064591 | 0.00013737 | ASV_3526                                           | 0.00089383 | 0.00019199 | ASV_15996                                                 | 0.00078716 | 0.00024924 | Micrococccaceae_sp.                    | 0.00011893 | 2.16533E-05 | Parablastomonas_uncultured_bacterium                      | 0.00081348 | 0.00026724 |
| Paeniosporosarcina_sp.                | 0.00109973 | 0.00032426 | Arcobacter_sp.                                    | 0.00064591 | 0.00013737 | Antricoccus_suffuscus                              | 0.00089383 | 0.00019199 | Erwiniaceae_sp.                                           | 0.00078716 | 0.00024924 | Leptotrichia_shahii                    | 0.00011893 | 2.0919E-05  | ASV_18385                                                 | 0.00081348 | 0.00026724 |
| Alistipes_uncultured_Bacteroidetes    | 0.00109973 | 0.00032426 | ASV_16215                                         | 0.00064591 | 0.00013737 | Plantibacter_sp.                                   | 0.00089383 | 0.00019199 | Verrucomicrobiaceae_uncultured_uncultured_Verrucomicrobia | 0.00078716 | 0.00024924 | Veillonella_sp.                        | 0.00011893 | 1.97054E-05 | Frankiales_sp.                                            | 0.00081348 | 0.00026724 |
| Mogibacterium_sp.                     | 0.00109973 | 0.00032426 | Calothrix_PCC-6303_uncultured_cyanobacterium      | 0.00064591 | 0.00013737 | Cellvibrionaceae_uncultured_metagenome             | 0.00089383 | 0.00019199 | Anoxybacillus_sp.                                         | 0.00078716 | 0.00024924 | Oribacterium_asaccharolyticum          | 0.00011893 | 1.70753E-05 | Streptococcus_mutans                                      | 0.00081348 | 0.00026724 |
| ASV_9910                              | 0.00109973 | 0.00032426 | Kocuria_marina                                    | 0.00062062 | 0.00013013 | bacterium_YT0325                                   | 0.00084084 | 0.00026026 | Nitrosotaleaceae_uncultured_archaeon                      | 0.00078716 | 0.00024924 | Filifactor_sp.                         | 0.00011893 | 1.42028E-05 | Crocinitomix_sp.                                          | 0.00081348 | 0.00026724 |



|                                                                   | 324<br>9 | 948<br>8  |                                             | 688<br>8 | 728<br>9 |                                            | 302<br>8 | 658<br>9 |                                                          | 820<br>8 | 814<br>2 |                                                                     | E-<br>05 | E-<br>05   |                                                       | 537<br>5 | 673<br>5 |
|-------------------------------------------------------------------|----------|-----------|---------------------------------------------|----------|----------|--------------------------------------------|----------|----------|----------------------------------------------------------|----------|----------|---------------------------------------------------------------------|----------|------------|-------------------------------------------------------|----------|----------|
| Isosphaeraceae_uncultured_soil                                    | 0.0009   | 0.002948  | ASV_2160                                    | 0.006218 | 0.00217  | Hypomonas_uncultured_bacterium             | 0.00084  | 0.00026  | Nocardia_pseudovaccinii                                  | 0.00065  | 0.00020  | Anaerovoracaceae_Family_XIII_UCG-006Peptostreptococcaceae_bacterium | 4.14697  | 1.31139    | Solitaleuncultured_Solitalea                          | 0.00068  | 0.00021  |
| Lentimicrobiaceae_uncultured_bacterium                            | 0.0009   | 0.002948  | Myxococcaceae_P30B-42uncultured_delta       | 0.00060  | 0.000159 | Amaricoccus_tarnworthensis                 | 0.00083  | 0.00026  | ASV_1592                                                 | 0.00064  | 0.00013  | ASV_1071                                                            | 4.14697  | 1.31139    | Patesciobacteria_CP_R2_uncultured_Firmicutes          | 0.00066  | 0.00014  |
| Prevotella_nigrescens                                             | 0.0008   | 0.000965  | Terrimicrobium_metagenome                   | 0.00060  | 0.000574 | ASV_7706                                   | 0.00080  | 0.00025  | Rickettsiales_SM2D12_unidentified_marine                 | 0.00063  | 0.00020  | Odoribacter_Bacteroidetes_sp.                                       | 4.14697  | 1.31139    | Rhodoblastus_uncultured_bacterium                     | 0.00065  | 0.00020  |
| ASV_4838                                                          | 0.0008   | 0.000866  | ASV_17791                                   | 0.00059  | 0.000808 | Tundrisphaera_lichenicola                  | 0.00079  | 0.00025  | Pedobacter_cryoconitis                                   | 0.00062  | 0.00021  | Rhodococcus_erythropolis                                            | 3.79579  | 1.16239    | Cultibacterium_granulosum                             | 0.00064  | 0.00014  |
| Fusicatenibacter_uncultured_organism                              | 0.0008   | 0.000857  | Pseudomonas_anguilliseptica                 | 0.00059  | 0.000808 | ASV_1760                                   | 0.00078  | 0.00024  | Opitutaceae_uncultured_soil_metagenome                   | 0.00062  | 0.00024  | ASV_678                                                             | 3.30595  | 1.04595    | Hungateostrictiaceae_uncultured_Firmicutes            | 0.00064  | 0.00020  |
| LIUU-11-16uncultured_Bacteroidetes                                | 0.0008   | 0.000857  | Bacteroidetes_vadinHA17_sp.                 | 0.00058  | 0.000608 | Actinomycetaceae_uncultured_sp.            | 0.00076  | 0.00024  | Flavobacteriales_NS9_marine_group_uncultured_soil        | 0.00061  | 0.00019  | Neisseriaceae_uncultured_organism                                   | 3.30595  | 1.04595    | ASV_3580                                              | 0.00063  | 0.00015  |
| Micrococcales_sp.                                                 | 0.0008   | 0.000840  | Chloroplast_Melosira_varians                | 0.00058  | 0.000608 | CAG-56_uncultured_bacterium                | 0.00076  | 0.00024  | Marinifilaceae_uncultured_sp.                            | 0.00061  | 0.00019  | Slackia_exigua                                                      | 2.26014  | 7.14719    | Bdellovibrionales_bacterium                           | 0.00060  | 0.00019  |
| ASV_2160                                                          | 0.0008   | 0.000727  | Halieaceae_OM60(NO_R5)_clade_sp.            | 0.00058  | 0.000608 | Candidatus_Protoclimydia_metagenome        | 0.00076  | 0.00024  | Micrarchaeales.CG1-02-32-21_sp.                          | 0.00061  | 0.00019  | ASV_9                                                               | 1.65974  | 5.22939    | Candidatus_Shapiro_bacteria_uncultured_bacterium      | 0.00060  | 0.00019  |
| Hypomicrobiaceae_uncultured_metagenome                            | 0.0008   | 0.000562  | Holosporaceae_uncultured_Holosporaceae      | 0.00058  | 0.000608 | Bergeyella_sp.                             | 0.00075  | 0.00023  | Tardiphaga_sp.                                           | 0.00061  | 0.00019  | Xanthomonadaceae_Xanthomonas_sp.                                    | 1.56014  | 4.9336E-05 | Chloroflexi_KD4-96_uncultured_bacterium               | 0.00060  | 0.00019  |
| ASV_6442                                                          | 0.0008   | 0.000526  | Leuconostoc_sp.                             | 0.00058  | 0.000608 | ASV_8430                                   | 0.00072  | 0.00022  | WPS-2_uncultured_bacterium                               | 0.00061  | 0.00019  | 009E01-B-SD-P15_uncultured_bacterium                                | 0        | 0          | Ruminiclostridium_metagenome                          | 0.00060  | 0.00013  |
| Dehalococcoidia_S085_metagenome                                   | 0.0008   | 0.000526  | Thermomicrobiales_JG30-KF-CM45_metagenome   | 0.00058  | 0.000608 | Lachnospiraceae_uncultured_Eubacterium     | 0.00072  | 0.00022  | C39_uncultured_bacterium                                 | 0.00059  | 0.00018  | 1013-28-CG33_uncultured_soil                                        | 0        | 0          | Acidithiobacillaceae_KCM-B-112_sp.                    | 0.00057  | 0.00018  |
| Saccharimonadales_uncultured_organism                             | 0.0008   | 0.000499  | ASV_12970                                   | 0.00058  | 0.000544 | Ferruginibacter_uncultured_Ferruginibacter | 0.00068  | 0.00021  | Actinomyces_uncultured_bacterium                         | 0.00059  | 0.00018  | Abditibacterium_sp.                                                 | 0        | 0          | Hydrogenophilus_sp.                                   | 0.00057  | 0.00018  |
| ASV_366                                                           | 0.0008   | 0.000473  | Bdellovibrio_uncultured_delta               | 0.00057  | 0.000229 | Rubritepida_uncultured_bacterium           | 0.00068  | 0.00021  | ASV_5066                                                 | 0.00059  | 0.00018  | Absconditabacteriales_(SR1)_metagenome                              | 0        | 0          | Intrasporangiaceae_sp.                                | 0.00057  | 0.00018  |
| Anaerovoracaceae_Family_XIII_AD3011_groupuncultured_Clostridiales | 0.0008   | 0.000305  | Methylacidiphilaceae_uncultured_sp.         | 0.00057  | 0.000229 | Catelicoccus_sp.                           | 0.00068  | 0.00021  | Cloacimonadaceae_uncultured_bacterium                    | 0.00059  | 0.00018  | Absconditabacteriales_(SR1)_uncultured_bacterium                    | 0        | 0          | Arco bacteraceae_sp.                                  | 0.00057  | 0.00018  |
| Rothia_aeria                                                      | 0.0008   | 0.000276  | Patesciobacteria_CPR2_uncultured_Firmicutes | 0.00057  | 0.000229 | Lentimicrobiaceae_wastewater_metagenome    | 0.00067  | 0.00021  | Dehalococcoidia_uncultured_sp.                           | 0.00059  | 0.00018  | Absconditabacteriales_(SR1)_candidate_division                      | 0        | 0          | Berkelbacteria_sp.                                    | 0.00057  | 0.00014  |
| Rhodospirillales_uncultured_Rhodospirillaceae                     | 0.0008   | 0.000228  | Oligoflexales_uncultured_soil               | 0.00057  | 0.00015  | Tepidiphilus_uncultured_bacterium          | 0.00067  | 0.00021  | Lachnospiraceae_NK4A136_group_sp.                        | 0.00059  | 0.00018  | Absconditabacteriales_(SR1)_sp.                                     | 0        | 0          | Candidatus_Blackburnbacteria                          | 0.00057  | 0.00014  |
| Solobacterium_moorei                                              | 0.0008   | 0.000228  | ASV_7308                                    | 0.00055  | 0.00017  | Atoposipes_sp.                             | 0.00067  | 0.00021  | MarmoricolaMarmoricola_sp.                               | 0.00057  | 0.00018  | Absconditabacteriales_(SR1)_uncultured_candidate                    | 0        | 0          | Candidatus_Saccharimonas_uncultured_rumen             | 0.00057  | 0.00014  |
| Slackia_isoflavonicovergens                                       | 0.0008   | 0.000081  | Candidatus_Finniella                        | 0.00054  | 0.00017  | Dorea_sp.                                  | 0.00067  | 0.00021  | Rhodocytophaga_sp.                                       | 0.00057  | 0.00018  | Absconditabacteriales_(SR1)_uncultured_Epsilonproteobacteria        | 0        | 0          | Dorea_uncultured_Lachnospiraceae                      | 0.00057  | 0.00014  |
| ASV_4573                                                          | 0.0008   | 0.00029   | Saccharina_japonica                         | 0.00052  | 0.000779 | Peptoclostridium_uncultured_organism       | 0.00067  | 0.00021  | Sporomusaceae_uncultured_bacterium                       | 0.00057  | 0.00018  | Absconditabacteriales_(SR1)_uncultured_organism                     | 0        | 0          | Erysipelatoclostridium_sp.                            | 0.00057  | 0.00014  |
| ASV_14135                                                         | 0.0007   | 0.0002971 | Pseudomonas_agarici                         | 0.00052  | 0.00018  | ASV_2888                                   | 0.00066  | 0.00021  | ASV_3544                                                 | 0.00057  | 0.00018  | Absconditabacteriales_(SR1)_uncultured_prokaryote                   | 0        | 0          | Jeotgallcoccus_sp.                                    | 0.00057  | 0.00014  |
| Planctomycetota_OM190_metagenome                                  | 0.0007   | 0.0002971 | Sporomusaceae_uncultured_bacterium          | 0.00051  | 0.00021  | Smithella_sp.                              | 0.00065  | 0.00020  | Finegoldia_uncultured_bacterium                          | 0.00056  | 0.00015  | ABY1_sp.                                                            | 0        | 0          | Leptospiraceae_RB-G-16-49-21_sp.                      | 0.00057  | 0.00014  |
| Noviherbaspirillum_sp.                                            | 0.0007   | 0.0002912 | uncultured_Thermoflavimicrobium             | 0.00051  | 0.00021  | Uliginosibacterium_metagenome              | 0.00065  | 0.00020  | Anaerolineaceae_uncultured_Longilinea                    | 0.00056  | 0.00017  | Acanthopleuribacterium_uncultured_bacterium                         | 0        | 0          | Spirosomaceae_uncultured_bacterium                    | 0.00057  | 0.00014  |
| ASV_13923                                                         | 0.0007   | 0.0002673 | ASV_256                                     | 0.00049  | 0.00015  | ASV_5871                                   | 0.00064  | 0.00020  | BSV26_uncultured_bacterium                               | 0.00056  | 0.00017  | Acetitomaculum_uncultured_bacterium                                 | 0        | 0          | Thermoleophilum_uncultured_sp.                        | 0.00057  | 0.00014  |
| ASV_13925                                                         | 0.0007   | 0.0002673 | Chloroplast_Cymbella_suburgidula            | 0.00049  | 0.00015  | Bacillaceae_uncultured_bacterium           | 0.00064  | 0.00020  | Rs-M47uncultured_delta                                   | 0.00056  | 0.00017  | Acetitomaculum_uncultured_rumen                                     | 0        | 0          | Candidatus_Colwellbacteria_uncultured_bacterium       | 0.00057  | 0.00014  |
| ASV_13930                                                         | 0.0007   | 0.0002673 | Streptomyces_sp.                            | 0.00049  | 0.00015  | Propionivibrio_metagenome                  | 0.00064  | 0.00020  | Cytophaga_xylanolytica_groupuncultured_prokaryote        | 0.00056  | 0.00017  | Acetitomaculum_sp.                                                  | 0        | 0          | Christensenellaceae_R-7_group_iron-reducing_bacterium | 0.00057  | 0.00014  |
| Candidatus_Methanoplasma_uncultured_archaeon                      | 0.0007   | 0.0002613 | ASV_1592                                    | 0.00048  | 0.000205 | Marinifilaceae_uncultured_bacterium        | 0.00062  | 0.00020  | ASV_17382                                                | 0.00054  | 0.00017  | Acetivibrio_uncultured_bacterium                                    | 0        | 0          | Clostridium_acidisoli                                 | 0.00057  | 0.00014  |
| Pirellulauncultured_organism                                      | 0.0007   | 0.0002611 | Sporichthyaceae_metagenome                  | 0.00046  | 0.00015  | ASV_13794                                  | 0.00061  | 0.00020  | Thermomicrobiales_JG30-KF-CM45uncultured_Thermomicrobium | 0.00054  | 0.00017  | Acetoanaerobium_uncultured_bacterium                                | 0        | 0          | Prolixibacteraceae_sp.                                | 0.00057  | 0.00014  |
| ASV_14819                                                         | 0.0007   | 0.0002555 | Syntrophia_sp.                              | 0.00046  | 0.00015  | SBR1031_wastewater_metagenome              | 0.00061  | 0.00020  | Epulopiscium_uncultured_Clostridium                      | 0.00053  | 0.00017  | Acetobacter_sp.                                                     | 0        | 0          | Gracilbacteria_Candidatus_Peregrinibacteria           | 0.00057  | 0.00014  |
| ASV_14825                                                         | 0.0007   | 0.0002555 | ASV_2249                                    | 0.00046  | 0.00014  | Burkholderiales_TRA3-20_metagenome         | 0.00060  | 0.00020  | Nakamurella_uncultured_bacterium                         | 0.00050  | 0.00016  | Acetobacteraceae_sp.                                                | 0        | 0          | Defluviitaleaceae_UCG-011_sp.                         | 0.00055  | 0.00015  |
| Thermomicrobiales_AKYG1722_sp.                                    | 0.0007   | 0.0002555 | Sandaracinus_sp.                            | 0.00046  | 0.00015  | Cavicella_uncultured_bacterium             | 0.00060  | 0.00020  | ASV_11446                                                | 0.00049  | 0.00015  | Acetobacteraceae_uncultured_bacterium                               | 0        | 0          | ASV_7512                                              | 0.00055  | 0.00017  |

|                                                     |                        |                        |                                                                |                        |                        |                                                         |                        |                        |                                                      |                        |                        |                                                    |   |   |                                                         |                        |                        |
|-----------------------------------------------------|------------------------|------------------------|----------------------------------------------------------------|------------------------|------------------------|---------------------------------------------------------|------------------------|------------------------|------------------------------------------------------|------------------------|------------------------|----------------------------------------------------|---|---|---------------------------------------------------------|------------------------|------------------------|
| Lentimicrobium_saccharophilum                       | 0.0<br>002<br>459<br>9 | 0.0<br>002<br>359<br>0 | Izomoplasmataceae_uncultured_bacterium                         | 0.0<br>046<br>734<br>4 | 0.0<br>014<br>778<br>7 | Corynebacterium_ropinquinum                             | 0.0<br>060<br>427<br>5 | 0.0<br>019<br>108<br>9 | Acetobacter_sp.                                      | 0.0<br>049<br>198<br>1 | 0.0<br>015<br>557<br>8 | Acetobacteraceae_uncultured_metagenome             | 0 | 0 | Novosphingobium_uncultured_prokaryote                   | 0.0<br>055<br>684<br>5 | 0.0<br>017<br>609<br>1 |
| Mitochondria_Eukaryota_sp.                          | 0.0<br>007<br>304<br>5 | 0.0<br>001<br>774<br>1 | Lachnoanaerobaculum_umeense                                    | 0.0<br>046<br>734<br>4 | 0.0<br>014<br>778<br>7 | Moraxella_sp.                                           | 0.0<br>060<br>427<br>5 | 0.0<br>019<br>108<br>9 | Anaerofilumuncultured_Anaerofilum                    | 0.0<br>049<br>198<br>1 | 0.0<br>015<br>557<br>8 | Acetobacteraceae_uncultured_sp.                    | 0 | 0 | Oscillospiraceae_NK4A214_group_sp.                      | 0.0<br>055<br>684<br>5 | 0.0<br>017<br>609<br>1 |
| ASV_7625                                            | 0.0<br>007<br>200<br>2 | 0.0<br>002<br>276<br>9 | Caldicoprobacter_uncultured_bacterium                          | 0.0<br>045<br>758<br>6 | 0.0<br>014<br>47       | Rokubacteriales_WX69bacterium_WX65                      | 0.0<br>057<br>974<br>1 | 0.0<br>018<br>333      | Armatimonadota_uncultured_metagenome                 | 0.0<br>049<br>198<br>1 | 0.0<br>015<br>557<br>8 | Acetobacteraceae_uncultured_alpha_protobacterium   | 0 | 0 | Sulfurimonas_Sulfurimonas_sp.                           | 0.0<br>055<br>684<br>5 | 0.0<br>017<br>609<br>1 |
| Galbitalea_sp.                                      | 0.0<br>007<br>121<br>6 | 0.0<br>002<br>252<br>1 | Vampirovibrio_sp.                                              | 0.0<br>044<br>397<br>7 | 0                      | ASV_15081                                               | 0.0<br>057<br>782<br>6 | 0.0<br>018<br>272<br>5 | ASV_18394                                            | 0.0<br>049<br>198<br>1 | 0.0<br>015<br>557<br>8 | Acetobacterium_sp.                                 | 0 | 0 | Phreatobacter_metagenome                                | 0.0<br>054<br>500<br>3 | 0.0<br>017<br>234<br>5 |
| Clostridium_sensu_stricto_1_metagenome              | 0.0<br>007<br>085<br>9 | 0.0<br>002<br>240<br>8 | Flavobacteriales_NS9_marine_group_uncultured_bacterium         | 0.0<br>043<br>267<br>8 | 0.0<br>013<br>682<br>4 | ASV_15083                                               | 0.0<br>057<br>782<br>6 | 0.0<br>018<br>272<br>5 | Candidatus_Renichlamydia_uncultured_Candidatus       | 0.0<br>049<br>198<br>1 | 0.0<br>015<br>557<br>8 | Acetothermia_uncultured_bacterium                  | 0 | 0 | Fusobacterium_necrophorum                               | 0.0<br>053<br>306<br>9 | 0.0<br>016<br>857<br>1 |
| Myxococcaceae_uncultured_sp.                        | 0.0<br>006<br>985<br>3 | 0.0<br>002<br>208<br>9 | Moraxella_catarhalis                                           | 0.0<br>043<br>267<br>6 | 0.0<br>013<br>682<br>4 | Hypomonadaceae_SWB02_uncultured_soil                    | 0.0<br>057<br>782<br>6 | 0.0<br>018<br>272<br>5 | Cytophaga_uncultured_Bacteroidetes                   | 0.0<br>049<br>198<br>1 | 0.0<br>015<br>557<br>8 | Acholeplasma_uncultured_bacterium                  | 0 | 0 | Pirellulauncultured_Pirellula                           | 0.0<br>053<br>306<br>9 | 0.0<br>016<br>857<br>1 |
| LActobacillales_sp.                                 | 0.0<br>006<br>876<br>1 | 0.0<br>002<br>174<br>4 | Prevotella_corporis                                            | 0.0<br>042<br>031<br>2 | 0.0<br>013<br>291<br>4 | Rothia_dentocariosa                                     | 0.0<br>057<br>782<br>6 | 0.0<br>018<br>272<br>5 | Dysgonomonadaceae_uncultured_uncultured_soil         | 0.0<br>049<br>198<br>1 | 0.0<br>015<br>557<br>8 | Acholeplasma_axanthum                              | 0 | 0 | Deinococcus_radiosistens                                | 0.0<br>052<br>481<br>8 | 0.0<br>016<br>596<br>2 |
| Gaiellales_sp.                                      | 0.0<br>006<br>838<br>2 | 0.0<br>002<br>162<br>4 | Anoxybacillus_sp.                                              | 0.0<br>041<br>455<br>1 | 0.0<br>013<br>109<br>3 | ASV_10346                                               | 0.0<br>056<br>529<br>1 | 0.0<br>017<br>876<br>1 | Microsillaceae_sp.                                   | 0.0<br>049<br>198<br>1 | 0.0<br>015<br>557<br>8 | Acholeplasma_brassicae                             | 0 | 0 | Candidatus_Abawacabacteria                              | 0.0<br>052<br>136<br>5 | 0.0<br>011<br>058<br>1 |
| Sphingobacteriaceae_uncultured_sp.                  | 0.0<br>008<br>036<br>2 | 0.0<br>000<br>000<br>0 | Prevotella_nigrescens                                          | 0.0<br>041<br>455<br>1 | 0.0<br>013<br>109<br>3 | ASV_3443                                                | 0.0<br>056<br>529<br>1 | 0.0<br>017<br>876<br>1 | Rhizobiales_Incertae_Sedis_uncultured_bacterium      | 0.0<br>049<br>198<br>1 | 0.0<br>015<br>557<br>8 | Acholeplasma_laidlawii                             | 0 | 0 | Freitbacterium_uncultured_bacterium                     | 0.0<br>051<br>924<br>7 | 0.0<br>016<br>42<br>0  |
| Sphingobacteriales_KD3-93_metagenome                | 0.0<br>006<br>838<br>2 | 0.0<br>000<br>000<br>0 | Cloacimonadia_PBS-18_uncultured_bacterium                      | 0.0<br>041<br>388<br>2 | 0.0<br>013<br>088<br>2 | Salinicoccus_sp.                                        | 0.0<br>056<br>529<br>1 | 0.0<br>017<br>876<br>1 | Rhizobiales_sp.                                      | 0.0<br>049<br>198<br>1 | 0.0<br>015<br>557<br>8 | Acholeplasma_morum                                 | 0 | 0 | ASV_19068                                               | 0.0<br>050<br>828<br>5 | 0.0<br>016<br>073<br>4 |
| Acidocella_uncultured_bacterium                     | 0.0<br>006<br>821<br>3 | 0.0<br>002<br>157<br>1 | Physcisphaerales_AKA_U3564_sediment_group_uncultured_bacterium | 0.0<br>041<br>050<br>9 | 0.0<br>012<br>981<br>4 | Eubacterium_coprostanoligenes_group_uncultured_rumen    | 0.0<br>055<br>567<br>1 | 0.0<br>017<br>571<br>9 | Paenicostridium_sp.                                  | 0.0<br>048<br>201<br>3 | 0.0<br>015<br>242<br>6 | Acholeplasma_sp.                                   | 0 | 0 | ASV_2910                                                | 0.0<br>050<br>828<br>5 | 0.0<br>016<br>073<br>4 |
| ASV_14909                                           | 0.0<br>006<br>821<br>3 | 0.0<br>002<br>157<br>1 | SR-FBR-L83_uncultured_bacterium                                | 0.0<br>041<br>050<br>9 | 0                      | Acidithiobacillus_ferrioxidans                          | 0.0<br>054<br>407<br>2 | 0.0<br>017<br>205      | ASV_5832                                             | 0.0<br>047<br>396<br>9 | 0.0<br>014<br>988<br>2 | Acholeplasmataceae_E-MP-G18_uncultured_Mollicutes  | 0 | 0 | Chloroflexia_JG30-KF-CM69_uncultured_soil               | 0.0<br>050<br>828<br>5 | 0.0<br>016<br>073<br>4 |
| Butyrivococaceae_UCG-009_uncultured_Ruminococcaceae | 0.0<br>006<br>821<br>3 | 0.0<br>002<br>157<br>1 | Afipia_sp.                                                     | 0.0<br>039<br>404<br>2 | 0.0<br>012<br>460<br>7 | ASV_14771                                               | 0.0<br>054<br>407<br>2 | 0.0<br>017<br>205      | Bacteroidetes_vadinHA17_uncultured_soil              | 0.0<br>047<br>014<br>6 | 0.0<br>014<br>867<br>3 | Acholeplasmauncultured_Acholeplasmataceae          | 0 | 0 | Parcubacteriawastewater_metagenome                      | 0.0<br>050<br>828<br>5 | 0.0<br>016<br>073<br>4 |
| Fibrobacteria_sp.                                   | 0.0<br>006<br>821<br>3 | 0.0<br>002<br>157<br>1 | ASV_2889                                                       | 0.0<br>039<br>231<br>1 | 0.0<br>012<br>406      | Gammaproteobacteria_CHAB-X1-28_uncultured_bacterium     | 0.0<br>054<br>407<br>2 | 0.0<br>017<br>205      | Rikenellaceae_uncultured_bacterium                   | 0.0<br>047<br>014<br>6 | 0.0<br>014<br>867<br>3 | Achromatium_sp.                                    | 0 | 0 | ASV_1642                                                | 0.0<br>050<br>828<br>5 | 0.0<br>016<br>073<br>4 |
| Dialister_sp.                                       | 0.0<br>006<br>659<br>7 | 0.0<br>002<br>106<br>0 | ASV_9591                                                       | 0.0<br>039<br>231<br>1 | 0.0<br>012<br>406      | Leptospiraceae_RB_G-16-49-21_microbial_mat              | 0.0<br>054<br>407<br>2 | 0.0<br>017<br>205      | ASV_3349                                             | 0.0<br>045<br>391<br>1 | 0.0<br>014<br>931<br>2 | Acidaminobacter_uncultured_bacterium               | 0 | 0 | ASV_5529                                                | 0.0<br>050<br>193<br>9 | 0.0<br>016<br>872<br>7 |
| Tissierella_sp.                                     | 0.0<br>006<br>653<br>6 | 0.0<br>000<br>310<br>1 | Candidatus_Colwellbacteria_sp.                                 | 0.0<br>039<br>231<br>1 | 0.0<br>012<br>406      | Leeia_uncultured_bacterium                              | 0.0<br>053<br>770<br>1 | 0.0<br>011<br>404<br>8 | Leptospira_biflexa                                   | 0.0<br>045<br>391<br>1 | 0.0<br>014<br>931<br>2 | Acidaminococcaceae_uncultured_bacterium            | 0 | 0 | Clostridia_UCG-014_Clostridiales_bacterium              | 0.0<br>050<br>193<br>9 | 0.0<br>016<br>872<br>7 |
| Candidatus_Saccharimonas                            | 0.0<br>006<br>630<br>5 | 0.0<br>002<br>096<br>7 | Acetobacterium_sp.                                             | 0.0<br>038<br>432<br>3 | 0.0<br>012<br>153<br>3 | Ktedonobacteraceae_uncultured_Ktedonobacteria           | 0.0<br>052<br>874<br>1 | 0.0<br>016<br>720<br>3 | Atopobiaceae_sp.                                     | 0.0<br>044<br>392<br>3 | 0.0<br>014<br>199<br>4 | Acidibacter_metagenome                             | 0 | 0 | ASV_2084                                                | 0.0<br>049<br>668<br>6 | 0.0<br>015<br>706<br>6 |
| Candidatus_Collierauncultured_Chloroflexi           | 0.0<br>006<br>610<br>6 | 0.0<br>002<br>090<br>5 | Saprospraceae_uncultured_Bacteroidetes                         | 0.0<br>037<br>789<br>5 | 0                      | Pedococcus_sp.                                          | 0.0<br>052<br>703<br>7 | 0.0<br>016<br>666<br>4 | Simkaniaceae_uncultured_marine_sediment              | 0.0<br>043<br>777<br>7 | 0.0<br>013<br>843<br>5 | Acidibacter_uncultured_bacterium                   | 0 | 0 | Bhvi28_wastewater-sludge_group_uncultured_Bacteroidetes | 0.0<br>049<br>566<br>3 | 0.0<br>015<br>674<br>2 |
| Coriobacteria_OPB41_sp.                             | 0.0<br>006<br>610<br>6 | 0.0<br>002<br>090<br>5 | Corynebacterium_amycolatum                                     | 0.0<br>037<br>387<br>5 | 0.0<br>011<br>823      | Cellvibrio_metagenome                                   | 0.0<br>052<br>491<br>3 | 0.0<br>016<br>599<br>2 | Solitaleauncultured_Sphingobacteriales               | 0.0<br>043<br>777<br>7 | 0.0<br>013<br>843<br>5 | Acidibacter_sp.                                    | 0 | 0 | Monoglobus_uncultured_Firmicutes                        | 0.0<br>049<br>566<br>3 | 0.0<br>015<br>674<br>2 |
| Luteolibacter_luojensis                             | 0.0<br>006<br>610<br>6 | 0.0<br>002<br>090<br>5 | Myroides_indicus                                               | 0.0<br>037<br>387<br>5 | 0.0<br>011<br>823      | Chitinophagaceae_uncultured_uncultured_Sphingobacterium | 0.0<br>050<br>581<br>7 | 0.0<br>015<br>995<br>3 | WS4_uncultured_bacterium                             | 0.0<br>043<br>777<br>7 | 0.0<br>013<br>843<br>5 | Acidimicrobia_IMCC26_256_metagenome                | 0 | 0 | Ruminococcus_birculans                                  | 0.0<br>048<br>463<br>3 | 0.0<br>015<br>325<br>3 |
| Cloacibacterium_sp.                                 | 0.0<br>006<br>569<br>6 | 0.0<br>001<br>484<br>8 | Tundrisphaera_sp.                                              | 0.0<br>037<br>387<br>5 | 0                      | Methylotenera_sp.                                       | 0.0<br>050<br>581<br>7 | 0.0<br>015<br>995<br>3 | Anaerohabdus_furcosa_group_uncultured_bacterium      | 0.0<br>043<br>668<br>1 | 0.0<br>013<br>809<br>1 | Acidimicrobia_IMCC26_256_sp.                       | 0 | 0 | ASV_6484                                                | 0.0<br>048<br>444<br>7 | 0.0<br>015<br>319<br>6 |
| Flexibacter_flexilis                                | 0.0<br>006<br>448<br>0 | 0.0<br>002<br>039<br>0 | Clostridium_gasigenes                                          | 0.0<br>036<br>777<br>3 | 0.0<br>011<br>63       | Runella_sp.                                             | 0.0<br>050<br>581<br>7 | 0.0<br>015<br>995<br>3 | ASV_10605                                            | 0.0<br>043<br>668<br>1 | 0.0<br>013<br>809<br>1 | Acidimicrobia_IMCC26_256_uncultured_bacterium      | 0 | 0 | Meiothermus_uncultured_Deinococci                       | 0.0<br>046<br>990<br>9 | 0.0<br>014<br>859<br>8 |
| Fibrobacteriales_sp.                                | 0.0<br>006<br>233<br>2 | 0.0<br>001<br>350<br>5 | Flavobacterium_unidentified                                    | 0.0<br>036<br>606<br>6 | 0.0<br>011<br>576      | Oscillospirales_UCG-010uncultured_Ruminococcaceae       | 0.0<br>050<br>559<br>8 | 0.0<br>015<br>988<br>4 | Woeseearchaeales_SC_GC_AA286-E23_uncultured_archaeon | 0.0<br>042<br>407<br>8 | 0.0<br>013<br>410<br>5 | Acidimicrobia_IMCC26_256_uncultured_soil           | 0 | 0 | Gemmataceae_uncultured_plantomycete_WY69                | 0.0<br>046<br>732<br>2 | 0.0<br>014<br>778<br>0 |
| Anaerococcusuncultured_organism                     | 0.0<br>006<br>216<br>6 | 0.0<br>001<br>965<br>9 | Flexibacter_sp.                                                | 0.0<br>036<br>606<br>6 | 0.0<br>011<br>576      | ASV_11616                                               | 0.0<br>048<br>453<br>5 | 0.0<br>015<br>322<br>3 | ASV_12965                                            | 0.0<br>041<br>371<br>9 | 0.0<br>013<br>982<br>2 | Acidimicrobia_IMCC26_256uncultured_Aciditerrimonas | 0 | 0 | Chujibacter_uncultured_Xanthomonadaceae                 | 0.0<br>046<br>564<br>3 | 0.0<br>014<br>724<br>9 |
| Ochrobactrum_sp.                                    | 0.0<br>006<br>216<br>6 | 0.0<br>001<br>965<br>9 | Babelialesuncultured_prokaryote                                | 0.0<br>035<br>99       | 0.0<br>011<br>381      | Rikenellaceae_uncultured_anaerobic                      | 0.0<br>048<br>453<br>5 | 0.0<br>015<br>322<br>3 | ASV_2250                                             | 0.0<br>039<br>399<br>4 | 0.0<br>012<br>459<br>2 | Acidimicrobia_IMCC26_256uncultured_actinobacterium | 0 | 0 | Siphonobacter_uncultured_bacterium                      | 0.0<br>046<br>426<br>2 | 0.0<br>014<br>681<br>3 |
| Photobacterium_sp.                                  | 0.0<br>006<br>216<br>6 | 0.0<br>001<br>965<br>9 | Cloacibacterium_sp.                                            | 0.0<br>035<br>896<br>5 | 7.56<br>95E-05         | Bacteriovoraceae_uncultured_deep-sea                    | 0.0<br>047<br>606<br>1 | 0.0<br>015<br>054<br>4 | ASV_19717                                            | 0.0<br>039<br>358<br>5 | 0.0<br>012<br>446<br>3 | Acidimicrobia_IMCC26_256uncultured_Actinomycetales | 0 | 0 | Candidatus_Collierauncultured_bacterium                 | 0.0<br>046<br>403<br>7 | 0.0<br>014<br>674<br>1 |
| ASV_3161                                            | 0.0<br>006<br>179<br>3 | 0.0<br>001<br>954<br>1 | Armatimonadales_uncultured_Chloroflexi                         | 0.0<br>035<br>186<br>5 | 0.0<br>011<br>126<br>3 | Corynebacterium_mycetoides                              | 0.0<br>047<br>606<br>1 | 0.0<br>015<br>054<br>4 | Brevundimonas_terrae                                 | 0.0<br>039<br>358<br>5 | 0.0<br>012<br>446<br>3 | Acidimicrobia_sp.                                  | 0 | 0 | Eubacterium_limosum                                     | 0.0<br>046<br>403<br>7 | 0.0<br>014<br>674<br>1 |
| Oxalobacteraceae_CM1G08_sp.                         | 0.0<br>006<br>171<br>6 | 0.0<br>001<br>951<br>6 | ASV_3560                                                       | 0.0<br>035<br>186<br>5 | 0.0<br>011<br>126<br>3 | Ralstonia_sp.                                           | 0.0<br>047<br>606<br>1 | 0.0<br>015<br>054<br>4 | Flectobacillus_fontis                                | 0.0<br>039<br>358<br>5 | 0.0<br>012<br>446<br>3 | Acidimicrobia_uncultured_bacterium                 | 0 | 0 | Holophagaceae_uncultured_bacterium                      | 0.0<br>046<br>403<br>7 | 0.0<br>014<br>674<br>1 |
| Actinobacteria_PeM15_metagenome                     | 0.0<br>005<br>968<br>6 | 0.0<br>001<br>887<br>4 | Lacibacter_sp.                                                 | 0.0<br>035<br>186<br>5 | 0.0<br>011<br>126<br>3 | Candidatus_Limnoluna_uncultured_bacterium               | 0.0<br>047<br>392<br>5 | 0.0<br>010<br>127<br>1 | LIUU-11-161_metagenome                               | 0.0<br>039<br>358<br>5 | 0.0<br>012<br>446<br>3 | Acidimicrobia_uncultured_metagenome                | 0 | 0 | Hungateidostridiales_uncultured_Saccharofermentans      | 0.0<br>046<br>403<br>7 | 0.0<br>014<br>674<br>1 |
| Chloroflexi_TK10uncultured_Chloroflexus             | 0.0<br>005<br>968<br>6 | 0.0<br>001<br>887<br>4 | ASV_20168                                                      | 0.0<br>034<br>614<br>1 | 0.0<br>010<br>945<br>9 | Lachnospiraceae_uncultured_Cellulosilyfivium            | 0.0<br>047<br>269<br>2 | 0.0<br>010<br>947<br>8 | Macellibacteroides_uncultured_bacterium              | 0.0<br>039<br>358<br>5 | 0.0<br>012<br>446<br>3 | Acidimicrobia_uncultured_sp.                       | 0 | 0 | Sporichthyaceae_sp.                                     | 0.0<br>046<br>403<br>7 | 0.0<br>014<br>674<br>1 |
| Demequinaceae_uncultured_bacterium                  | 0.0<br>005             | 0.0<br>001             | ASV_3349                                                       | 0.0<br>034             | 0.0<br>010             | Methanobacterium_millerae                               | 0.0<br>045             | 0.0<br>010             | Planctomycetota_OM190_planctomycete_A-2              | 0.0<br>039             | 0.0<br>012             | Acidimicrobia_uncultured_Acidimicrobia             | 0 | 0 | Sulfurospirillum_sp.                                    | 0.0<br>046             | 0.0<br>014             |

|                                                 |                        |                        |                                                           |                          |                         |                                                                               |                         |                         |                                                                |                         |                         |                                                               |   |   |                                                                 |                                |                         |
|-------------------------------------------------|------------------------|------------------------|-----------------------------------------------------------|--------------------------|-------------------------|-------------------------------------------------------------------------------|-------------------------|-------------------------|----------------------------------------------------------------|-------------------------|-------------------------|---------------------------------------------------------------|---|---|-----------------------------------------------------------------|--------------------------------|-------------------------|
|                                                 | 968<br>4               | 887<br>4               |                                                           | 614<br>1                 | 945<br>9                |                                                                               | 676<br>5                | 444<br>2                |                                                                | 358<br>5                | 446<br>3                |                                                               |   |   | 403<br>7                                                        | 674<br>1                       |                         |
| Lactobacillus_acidipiscis                       | 0.0<br>005<br>968<br>6 | 0.0<br>001<br>887<br>4 | Beijerinckiaeeae_1174<br>-901-<br>12_uncultured_bacterium | 0.00<br>034<br>614       | 0.00<br>010<br>945<br>9 | Nocardia_sp.                                                                  | 0.00<br>045<br>320<br>6 | 0.00<br>014<br>331<br>6 | ASV_9917                                                       | 0.00<br>038<br>053<br>7 | 0.00<br>012<br>032<br>6 | Acidimicrobia_uncultured_actinobacterium                      | 0 | 0 | Woesearchaeales_S<br>CGC_AA011-<br>D5Nanorchaetola_a<br>rchaeta | 0.00<br>046<br>043<br>7        | 0.00<br>014<br>674<br>1 |
| Flavobacteriales_sp.                            | 0.0<br>005<br>964<br>2 | 0.0<br>001<br>886<br>9 | Candidatus_Ryanbact<br>eria_sp.                           | 0.00<br>034<br>614       | 0.00<br>010<br>945<br>9 | Noviherbaspirillum_s<br>p.                                                    | 0.00<br>045<br>320<br>6 | 0.00<br>014<br>331<br>6 | Candidatus_Vogelbact<br>eria_uncultured_Parcu<br>bacteria      | 0.00<br>037<br>611<br>7 | 0.00<br>011<br>893<br>9 | Acidimicrobia_uncultured_Actinomycetales                      | 0 | 0 | Cloacimonadales_un<br>cultured_soil                             | 0.00<br>045<br>012<br>2        | 0.00<br>014<br>234<br>1 |
| Microtrichales_sp.                              | 0.0<br>005<br>964<br>8 | 0.0<br>001<br>886<br>2 | Hyaloperonospora_ara<br>bidopsis                          | 0.00<br>034<br>614       | 0.00<br>010<br>945<br>9 | Paludisphaera_sp.                                                             | 0.00<br>045<br>320<br>6 | 0.00<br>014<br>331<br>6 | Dehalococcoidia_RBG-<br>13-46-9_metagenome                     | 0.00<br>037<br>611<br>9 | 0.00<br>011<br>893<br>9 | Acidimicrobia_uncultured_bacterium_YC-ZSS-<br>LKJ199          | 0 | 0 | Saccharimonadalesu<br>ncultured_organism                        | 0.00<br>045<br>012<br>2        | 0.00<br>014<br>234<br>1 |
| ASV_3228                                        | 0.0<br>005<br>910<br>6 | 0.0<br>001<br>869<br>1 | ASV_7625                                                  | 0.00<br>034<br>150<br>3  | 0.00<br>010<br>799<br>3 | Peptoniphilus_sp.                                                             | 0.00<br>045<br>320<br>6 | 0.00<br>014<br>331<br>6 | Flavobacterium_subsa<br>xonium                                 | 0.00<br>037<br>611<br>9 | 0.00<br>011<br>893<br>9 | Acidiphilium_uncultured_bacterium                             | 0 | 0 | Methanofastidiosales<br>_uncultured_archaeo<br>n                | 0.00<br>045<br>001<br>4        | 0.00<br>014<br>230<br>7 |
| Rhizorhapis_uncultured_Sphingomonadaceae        | 0.0<br>005<br>708<br>3 | 0.0<br>000<br>000<br>0 | ASV_5084                                                  | 0.00<br>033<br>841<br>3  | 8.31<br>018<br>E-<br>05 | Rhizobiales_Incertae<br>Sedis_uncultured_<br>Alphaproteobacteria              | 0.00<br>045<br>320<br>6 | 0.00<br>014<br>331<br>6 | Luteolibacter_uncultured<br>_Verrucomicrobia                   | 0.00<br>037<br>611<br>9 | 0.00<br>011<br>893<br>9 | Acidiphilium_sp.                                              | 0 | 0 | Chloroplast_Planogl<br>abratella_opercularis                    | 0.00<br>043<br>634<br>4        | 0.00<br>013<br>798<br>4 |
| Sumeriaeauncultured_Desulfococcus               | 0.0<br>005<br>708<br>3 | 0.0<br>000<br>000<br>0 | Chloroplast_Cymatopl<br>eura_solea                        | 0.00<br>032<br>714<br>1  | 0.00<br>010<br>345<br>1 | Sphingobacteriales_<br>NS11-<br>12_marine_groupHa<br>ematococcus_lacstr<br>is | 0.00<br>045<br>320<br>6 | 0.00<br>014<br>331<br>6 | Pedospheraeae_AD<br>urb.Bin118_uncultured<br>_bacterium        | 0.00<br>037<br>611<br>9 | 0.00<br>011<br>893<br>9 | Acidisoma_sp.                                                 | 0 | 0 | ASV_6340                                                        | 0.00<br>043<br>270<br>6        | 0.00<br>013<br>683<br>4 |
| Enterobacteriaceae_sp.                          | 0.0<br>005<br>666<br>3 | 0.0<br>001<br>791<br>8 | ASV_11414                                                 | 0.00<br>031<br>523<br>4  | 9.96<br>857<br>E-<br>05 | ASV_6702                                                                      | 0.00<br>045<br>299<br>7 | 0.00<br>014<br>325<br>6 | Rubinsphaeraeae_S<br>H-PL14_sp.                                | 0.00<br>037<br>611<br>9 | 0.00<br>011<br>893<br>9 | Acidithiobacillaceae_K<br>CM-B-112_sp.                        | 0 | 0 | allotenuales_AKIW7<br>81_uncultured_bacte<br>rium               | 0.00<br>042<br>961<br>5        | 0.00<br>013<br>585<br>6 |
| Oligoflexus_uncultured_delta                    | 0.0<br>005<br>666<br>3 | 0.0<br>001<br>791<br>8 | Pyrinomonadaceae_R<br>B41_sp.                             | 0.00<br>031<br>327<br>3  | 0                       | Devosia_uncultured_<br>Rhizobiales                                            | 0.00<br>045<br>299<br>7 | 0.00<br>014<br>325<br>6 | S-BQ2-<br>57_soil_group_uncultu<br>red_bacterium               | 0.00<br>037<br>611<br>9 | 0.00<br>011<br>893<br>9 | Acidithiobacillus_ferro<br>xidans                             | 0 | 0 | Candidatus_Moranb<br>acteria_uncultured_<br>soil                | 0.00<br>042<br>961<br>5        | 0.00<br>013<br>585<br>6 |
| Paludibacteraceae_uncultured_bacterium          | 0.0<br>005<br>666<br>3 | 0.0<br>001<br>791<br>8 | Acidothermus_sp.                                          | 0.00<br>030<br>377<br>4  | 9.60<br>618<br>E-<br>05 | Eisenbergiella_sp.                                                            | 0.00<br>044<br>415<br>7 | 0.00<br>014<br>045<br>5 | Sericytochromatium_u<br>ncultured_bacterium                    | 0.00<br>037<br>611<br>9 | 0.00<br>011<br>893<br>9 | Acidobacteria_bacteri<br>um                                   | 0 | 0 | Hyphomonadaceae_<br>SWB02_sp.                                   | 0.00<br>042<br>961<br>5        | 0.00<br>013<br>585<br>6 |
| Enhydrobacter_sp.                               | 0.0<br>005<br>648<br>2 | 0.0<br>001<br>786<br>1 | Oscillospiraceae_UCG<br>002gut_metagenome                 | 0.00<br>030<br>377<br>4  | 9.60<br>618<br>E-<br>05 | Geobacteraceae_un<br>cultured_bacterium                                       | 0.00<br>044<br>415<br>7 | 0.00<br>014<br>045<br>5 | ASV_9602                                                       | 0.00<br>037<br>611<br>9 | 0.00<br>011<br>893<br>9 | Acidobacteriaceae_(Su<br>bgroup_1)_sp.                        | 0 | 0 | Kapapobacteriales_met<br>agenome                                | 0.00<br>042<br>961<br>5        | 0.00<br>013<br>585<br>6 |
| Sphingomonas_koreensis                          | 0.0<br>005<br>642<br>0 | 0.0<br>000<br>000<br>0 | ASV_21390                                                 | 0.00<br>029<br>904<br>3  | 9.45<br>657<br>E-<br>05 | Prevotella_nigrescen<br>s                                                     | 0.00<br>044<br>242<br>2 | 0.00<br>010<br>155<br>6 | Planktothrix_NIVA-<br>CYA_15_sp.                               | 0.00<br>037<br>611<br>9 | 0.00<br>011<br>774<br>6 | Acidobacteriae_Elev-<br>16S-1166_sp.                          | 0 | 0 | NannocystaceaeEnh<br>ygromyxa_sp.                               | 0.00<br>042<br>961<br>5        | 0.00<br>013<br>585<br>6 |
| ASV_2433                                        | 0.0<br>005<br>594<br>9 | 0.0<br>001<br>769<br>3 | Solirubrobacteriales_6<br>7-14_sp.                        | 0.00<br>029<br>904<br>3  | 0                       | Candidatus_Ovatub<br>acter                                                    | 0.00<br>043<br>336<br>9 | 0.00<br>013<br>704<br>3 | Methanobacteriumuncu<br>ltured_Methanobacteri<br>aceae         | 0.00<br>037<br>611<br>9 | 0.00<br>011<br>767<br>5 | Acidobacteriae_Elev-<br>16S-<br>1166_uncultured_bacte<br>rium | 0 | 0 | Oligoflexales_uncult<br>ured_sp.                                | 0.00<br>042<br>961<br>5        | 0.00<br>013<br>585<br>6 |
| Johnsonella_ignava                              | 0.0<br>005<br>557<br>0 | 0.0<br>001<br>751<br>0 | Clostridium_sensu_stri<br>cto_13_Clostridium_sp<br>0      | 0.00<br>029<br>322<br>4  | 9.27<br>246<br>E-<br>05 | Microsillaceae_unc<br>ultured_Cytophagac<br>eae                               | 0.00<br>042<br>163<br>1 | 0.00<br>013<br>333<br>1 | ASV_19908                                                      | 0.00<br>036<br>539<br>7 | 0.00<br>011<br>554<br>9 | Acidobacteriae_sp.                                            | 0 | 0 | Sphingobacteriales_<br>NS11-<br>12_marine_group_m<br>etagenome  | 0.00<br>042<br>961<br>5        | 0.00<br>013<br>585<br>6 |
| ASV_6989                                        | 0.0<br>005<br>402<br>6 | 0.0<br>001<br>708<br>5 | ASV_12134                                                 | 0.00<br>028<br>896<br>4  | 9.13<br>784<br>E-<br>05 | Trueperanuncultured_<br>Deinococcales                                         | 0.00<br>041<br>675<br>3 | 0.00<br>013<br>178<br>9 | Candidatus_Saccharim<br>onas_uncultured_bacte<br>rium          | 0.00<br>036<br>539<br>7 | 0.00<br>011<br>554<br>9 | Acidocella_uncultured<br>_bacterium                           | 0 | 0 | Methylobacterium_je<br>otgalii                                  | 0.00<br>042<br>389<br>1        | 0.00<br>013<br>404<br>6 |
| Clostridia_UCG-014_uncultured_organism          | 0.0<br>005<br>314<br>4 | 0.0<br>001<br>680<br>6 | Gardnerella_sp.                                           | 0.00<br>028<br>824<br>05 | 9.11<br>495<br>E-<br>05 | ASV_16969                                                                     | 0.00<br>040<br>805<br>2 | 0.00<br>012<br>903<br>7 | Sphingobacteriales_KD<br>3-<br>93_uncultured_Bactero<br>idetes | 0.00<br>036<br>539<br>7 | 0.00<br>011<br>554<br>9 | Acidothermus_uncultu<br>red_bacterium                         | 0 | 0 | Chromobacteriaceae<br>_sp.                                      | 0.00<br>042<br>157<br>5        | 0.00<br>013<br>331<br>4 |
| Dehalococcoidia_RBG-13-46-9hot_springs          | 0.0<br>005<br>314<br>4 | 0.0<br>001<br>680<br>6 | Gemmata_uncultured_<br>Gemmata                            | 0.00<br>028<br>824<br>05 | 9.11<br>495<br>E-<br>05 | Fervidobacterium_un<br>cultured_bacterium                                     | 0.00<br>040<br>805<br>2 | 0.00<br>012<br>903<br>7 | ASV_9492                                                       | 0.00<br>034<br>934<br>5 | 0.00<br>011<br>047<br>3 | Acidothermus_sp.                                              | 0 | 0 | Polynucleobacter_co<br>smopolitanus                             | 0.00<br>041<br>539<br>7        | 0.00<br>013<br>136<br>3 |
| Sporichthyaceae_hgd_clade_uncultured_Frankineae | 0.0<br>005<br>314<br>4 | 0.0<br>000<br>000<br>0 | Simplicispira_metagen<br>ome                              | 0.00<br>028<br>824<br>0  | 0                       | Geobacter_uncultured<br>_Bansveld                                             | 0.00<br>040<br>805<br>2 | 0.00<br>012<br>903<br>7 | Cellvibrionaceae_sp.                                           | 0.00<br>034<br>934<br>5 | 0.00<br>011<br>047<br>3 | Acidovorax_sp.                                                | 0 | 0 | Anoxybacillus_sp.                                               | 0.00<br>041<br>305<br>2        | 0.00<br>013<br>061<br>9 |
| Chryseoglobus_sp.                               | 0.0<br>005<br>116<br>0 | 0.0<br>001<br>617<br>8 | Candidatus_Paracaedi<br>bacter_sp.                        | 0.00<br>028<br>792<br>05 | 9.10<br>483<br>E-<br>05 | Agromyces_sp.                                                                 | 0.00<br>040<br>377<br>9 | 0.00<br>012<br>768<br>6 | Candidatus_Finniella_s<br>p.                                   | 0.00<br>034<br>924<br>9 | 0.00<br>011<br>043<br>9 | Acinetobacter_metage<br>nome                                  | 0 | 0 | SJA-<br>28uncultured_ignavi<br>bacterium                        | 0.00<br>041<br>305<br>2        | 0.00<br>013<br>061<br>9 |
| Corynebacterium_mycoetoides                     | 0.0<br>005<br>116<br>0 | 0.0<br>001<br>617<br>8 | Desulfotribacteriales_T<br>C1_uncultured_bacteri<br>um    | 0.00<br>027<br>454<br>9  | 8.68<br>2E-<br>05       | ASV_13184                                                                     | 0.00<br>040<br>377<br>9 | 0.00<br>012<br>768<br>6 | Mycobacterium_absce<br>ssus                                    | 0.00<br>034<br>924<br>9 | 0.00<br>011<br>043<br>9 | Acinetobacter_bauman<br>nii                                   | 0 | 0 | ASV_3568                                                        | 0.00<br>040<br>756<br>E-<br>05 | 9.43<br>391<br>E-<br>05 |
| Gemmataceae_uncultured_Zavarziella              | 0.0<br>005<br>116<br>0 | 0.0<br>001<br>617<br>8 | Oscillospirales_UCG-<br>010_sp.                           | 0.00<br>027<br>454<br>9  | 8.68<br>2E-<br>05       | ASV_3442                                                                      | 0.00<br>040<br>377<br>9 | 0.00<br>012<br>768<br>6 | Centipeda_uncultured_<br>bacterium                             | 0.00<br>032<br>979<br>9 | 0.00<br>010<br>429<br>2 | Acinetobacter_kyonggi<br>ensis                                | 0 | 0 | ASV_20342                                                       | 0.00<br>040<br>662<br>8        | 0.00<br>012<br>858<br>7 |
| Spongibacteraceae_BD1-7_clade_sp.               | 0.0<br>005<br>116<br>0 | 0.0<br>000<br>000<br>0 | Spirosoma_sp.                                             | 0.00<br>027<br>454<br>9  | 0                       | Paenarthrobacter_sp                                                           | 0.00<br>040<br>377<br>9 | 0.00<br>012<br>768<br>6 | Staphylococcus_vitulin<br>us                                   | 0.00<br>032<br>979<br>9 | 0.00<br>010<br>429<br>2 | Acinetobacter_sp.                                             | 0 | 0 | ASV_2433                                                        | 0.00<br>040<br>662<br>8        | 0.00<br>012<br>858<br>7 |
| Sporobacter_sp.                                 | 0.0<br>005<br>116<br>0 | 0.0<br>000<br>000<br>0 | Candidatus_Amoebop<br>hilus_microbial_mat                 | 0.00<br>026<br>992<br>5  | 8.53<br>578<br>E-<br>05 | Chamaesiphon_PCC-<br>7430_uncultured_ba<br>cterium                            | 0.00<br>037<br>767<br>2 | 0.00<br>011<br>943<br>6 | ASV_1976                                                       | 0.00<br>032<br>832<br>8 | 0.00<br>010<br>382<br>6 | Acinetobacter_towneri                                         | 0 | 0 | Fibrobacteraceae_po<br>ssible_genus_04_me<br>tagenome           | 0.00<br>040<br>662<br>8        | 0.00<br>012<br>858<br>7 |
| Rhizorhapis_metagenome                          | 0.0<br>005<br>104<br>7 | 0.0<br>000<br>000<br>0 | Absonditobacteriales<br>(SR1)_uncultured_ba<br>cterium    | 0.00<br>025<br>960<br>5  | 8.20<br>943<br>E-<br>05 | Chitinimonas_taiwan<br>ensis                                                  | 0.00<br>037<br>767<br>2 | 0.00<br>011<br>943<br>6 | ASV_9639                                                       | 0.00<br>032<br>832<br>8 | 0.00<br>010<br>382<br>6 | Acremonium_fuci                                               | 0 | 0 | Halangium_uncultu<br>red_bacterium                              | 0.00<br>040<br>662<br>8        | 0.00<br>012<br>858<br>7 |
| Kaistia_uncultured_bacterium                    | 0.0<br>005<br>047<br>1 | 0.0<br>001<br>596<br>5 | Candidatus_Kerfeldba<br>cteria_uncultured_bact<br>erium   | 0.00<br>025<br>960<br>5  | 8.20<br>943<br>E-<br>05 | Rhodomicrobium_sp.                                                            | 0.00<br>037<br>767<br>2 | 0.00<br>011<br>943<br>6 | Chloroflexia_JG30-KF-<br>CM69_uncultured_soil                  | 0.00<br>032<br>429<br>5 | 0.00<br>010<br>255<br>5 | Actinobacillus_sp.                                            | 0 | 0 | Woeselia_uncultured<br>_bacterium                               | 0.00<br>040<br>370<br>6        | 0.00<br>012<br>766<br>3 |
| Oligoflexales_uncultured_bacterium              | 0.0<br>004<br>911<br>5 | 0.0<br>001<br>553<br>1 | Gracilibacteriuncultu<br>red_beta                         | 0.00<br>025<br>960<br>5  | 8.20<br>943<br>E-<br>05 | Verrucomicrobiaceae<br>_sp.                                                   | 0.00<br>037<br>767<br>2 | 0.00<br>011<br>943<br>6 | Oligoflexales_uncultu<br>red_soil                              | 0.00<br>032<br>429<br>5 | 0.00<br>010<br>255<br>5 | Actinobacteria_0319-<br>7L14_uncultured_actin<br>obacterium   | 0 | 0 | ASV_6623                                                        | 0.00<br>040<br>277<br>9        | 0.00<br>012<br>737<br>3 |
| 1013-28-CG33_uncultured_soil                    | 0.0<br>004<br>836<br>0 | 0.0<br>001<br>529<br>3 | Gracilibacteriawastew<br>ater_metagenome                  | 0.00<br>025<br>960<br>5  | 8.20<br>943<br>E-<br>05 | ASV_7913                                                                      | 0.00<br>037<br>421<br>5 | 0.00<br>011<br>833<br>7 | ASV_2910                                                       | 0.00<br>031<br>291<br>4 | 0.00<br>046<br>E-<br>05 | Actinobacteria_PeM15-<br>bacterium_rJ7                        | 0 | 0 | Bacteroidales_FTLp<br>ost3_uncultured_bac<br>terium             | 0.00<br>038<br>803<br>6        | 0.00<br>012<br>270<br>8 |
| ASV_3021                                        | 0.0<br>004<br>836<br>0 | 0.0<br>001<br>529<br>3 | Oligoflexia_0319-<br>6G20_uncultured_Ros<br>eobacter      | 0.00<br>025<br>960<br>5  | 8.20<br>943<br>E-<br>05 | Balneolaceae_sp.                                                              | 0.00<br>037<br>421<br>5 | 0.00<br>011<br>833<br>7 | Gaiellales_sp.                                                 | 0.00<br>030<br>644<br>5 | 0.00<br>048<br>E-<br>05 | Actinobacteria_PeM15-<br>metagenome                           | 0 | 0 | Gulosibacter_sp.                                                | 0.00<br>038<br>599<br>7        | 0.00<br>012<br>206<br>3 |
| Erysipelothrix_uncultured_bacterium             | 0.0<br>004<br>836<br>0 | 0.0<br>001<br>529<br>3 | Spirochaetaceae_uncu<br>ltured_bacterium                  | 0.00<br>025<br>960<br>5  | 0                       | Pararhodospirillum_p<br>hotometricum                                          | 0.00<br>037<br>421<br>5 | 0.00<br>011<br>833<br>7 | ASV_11789                                                      | 0.00<br>030<br>442<br>9 | 0.00<br>048<br>E-<br>05 | Actinobacteria_PeM15-<br>sp.                                  | 0 | 0 | ASV_1760                                                        | 0.00<br>038<br>352<br>1        | 0.00<br>012<br>128<br>8 |
| Lentimicrobiaceae_wastewater_metagenome         | 0.0<br>004<br>836<br>0 | 0.0<br>001<br>529<br>3 | ASV_13785                                                 | 0.00<br>023<br>642<br>5  | 7.47<br>E-<br>05        | Aquicella_uidentifie<br>d                                                     | 0.00<br>036<br>340<br>1 | 0.00<br>011<br>491<br>7 | Oligoflexus_uncultured<br>_Desulfococcus                       | 0.00<br>030<br>442<br>9 | 0.00<br>048<br>E-<br>05 | Actinobacteria_PeM15-<br>uncultured_soil                      | 0 | 0 | Chloroflexi_OLB14-<br>metagenome                                | 0.00<br>038<br>352<br>1        | 0.00<br>012<br>128<br>8 |
| Mucilagibacter_jinjuensis                       | 0.0<br>004<br>004      | 0.0<br>001<br>001      | Prolixibacteraceae_W<br>CHB1-                             | 0.00<br>023              | 0                       | SS1-B-02-<br>17uncultured_Lentis<br>phaerae                                   | 0.00<br>036             | 0.00<br>011             | Paludibaculum_uncultu<br>red_bacterium                         | 0.00<br>030             | 0.00<br>048<br>689      | Actinobacteria_PeM15u<br>ncultured_actinobacteri<br>um        | 0 | 0 | ASV_7105                                                        | 0.00<br>038                    | 0.00<br>012             |

|                                             | 836<br>0          | 529<br>3               | 32uncultured_Bacteroidetes                     | 642<br>5                |                         |                                                     | 340<br>1                | 491<br>7                 |                                                | 442<br>9                       | E-<br>05                |                                                      |   |   | 078<br>1                                          | 041<br>4                |                                |
|---------------------------------------------|-------------------|------------------------|------------------------------------------------|-------------------------|-------------------------|-----------------------------------------------------|-------------------------|--------------------------|------------------------------------------------|--------------------------------|-------------------------|------------------------------------------------------|---|---|---------------------------------------------------|-------------------------|--------------------------------|
| Eubacterium_eligens_group_sp.               | 0.0<br>004<br>817 | 0.0<br>001<br>523      | ASV_19533                                      | 0.00<br>023<br>457<br>7 | 7.41<br>798<br>E-<br>05 | ASV_18612                                           | 0.00<br>036<br>114<br>1 | 0.00<br>011<br>420<br>3  | Anaerolineaceae_uncultured_bacterium           | 0.00<br>029<br>934<br>9        | 9.46<br>625<br>E-<br>05 | Actinobacteria_sp.                                   | 0 | 0 | Victivallales_GWF2-44-16_Lentisphaerae_bacterium  | 0.00<br>038<br>078<br>1 | 0.00<br>012<br>041<br>4        |
| Candidatus_Omnitrophus_uncultured_Banisveid | 0.0<br>004<br>756 | 0.0<br>001<br>504<br>3 | ASV_5218                                       | 0.00<br>023<br>457<br>9 | 7.41<br>798<br>E-<br>05 | ASV_18619                                           | 0.00<br>036<br>114<br>3 | 0.00<br>011<br>420<br>3  | ASV_11362                                      | 0.00<br>029<br>934<br>5        | 9.46<br>625<br>E-<br>05 | Actinobacteria_uncultured_bacterium                  | 0 | 0 | MoheibacterMoheibacter_sediminis                  | 0.00<br>037<br>251<br>5 | 0.00<br>011<br>011<br>78       |
| Cephalosporium_sp.                          | 0.0<br>004<br>756 | 0.0<br>001<br>504<br>3 | Prevotellaceae_uncultured_metagenome           | 0.00<br>023<br>457<br>7 | 7.41<br>798<br>E-<br>05 | Erysipelothrix_sp.                                  | 0.00<br>036<br>114<br>1 | 0.00<br>011<br>420<br>3  | Bacteroides_massiliensis                       | 0.00<br>029<br>934<br>9        | 9.46<br>625<br>E-<br>05 | Actinobacteria_uncultured_metagenome                 | 0 | 0 | ASV_7984                                          | 0.00<br>037<br>197<br>8 | 0.00<br>011<br>011<br>763      |
| Opitutaceae_IMCC26134_metagenome            | 0.0<br>004<br>756 | 0.0<br>001<br>504<br>3 | ASV_2433                                       | 0.00<br>023<br>393<br>5 | 7.39<br>767<br>E-<br>05 | Silvanigrella_uncultured_bacterium                  | 0.00<br>036<br>114<br>1 | 0.00<br>011<br>420<br>3  | ASV_20846                                      | 0.00<br>029<br>466<br>518<br>8 | 9.33<br>466<br>E-<br>05 | Actinobacteria_uncultured_sp.                        | 0 | 0 | Gastranaerophilales_uncultured_cyanobacterium     | 0.00<br>037<br>197<br>8 | 0.00<br>011<br>011<br>763      |
| ASV_18243                                   | 0.0<br>004<br>721 | 0.0<br>001<br>493<br>2 | Clavibacter_sp.                                | 0.00<br>023<br>393<br>5 | 7.39<br>767<br>E-<br>05 | ASV_1642                                            | 0.00<br>035<br>451<br>9 | 0.00<br>011<br>210<br>9  | ASV_20847                                      | 0.00<br>029<br>466<br>518<br>8 | 9.33<br>466<br>E-<br>05 | Actinobacteria_uncultured_Actinomycetales_bacterium  | 0 | 0 | Aquicoella_unidentified                           | 0.00<br>037<br>123      | 0.00<br>011<br>011<br>739<br>3 |
| ASV_3442                                    | 0.0<br>004<br>721 | 0.0<br>001<br>493<br>2 | ASV_1901                                       | 0.00<br>021<br>594      | 6.82<br>862<br>E-<br>05 | ASV_8293                                            | 0.00<br>035<br>451<br>9 | 0.00<br>011<br>210<br>9  | Beggiatoa_uncultured_gamma                     | 0.00<br>029<br>466<br>518<br>8 | 9.33<br>466<br>E-<br>05 | Actinobacteriota_MB-A2-108_metagenome                | 0 | 0 | ASV_19669                                         | 0.00<br>037<br>123      | 0.00<br>011<br>011<br>739<br>3 |
| ASV_5084                                    | 0.0<br>004<br>721 | 0.0<br>001<br>493<br>2 | Limnobacter_metagenome                         | 0.00<br>021<br>594      | 6.82<br>862<br>E-<br>05 | Qipengyuania_uncultured_bacterium                   | 0.00<br>035<br>135<br>8 | 0.00<br>011<br>110<br>9  | Lacurnisphaera_sp.                             | 0.00<br>029<br>466<br>518<br>8 | 9.33<br>466<br>E-<br>05 | Actinobacteriota_MB-A2-108_sp.                       | 0 | 0 | Bdellovibrio_uncultured_gamma                     | 0.00<br>037<br>123      | 0.00<br>011<br>011<br>739<br>3 |
| bacterium_RS30A                             | 0.0<br>004<br>721 | 0.0<br>001<br>493<br>2 | Solirubrobacteraceae_uncultured_Phytolasma_sp. | 0.00<br>021<br>030<br>5 | 2.21<br>681<br>E-<br>05 | ASV_19037                                           | 0.00<br>034<br>729<br>5 | 0.00<br>010<br>982<br>4  | Spirochaetaceae_GWE-2-31-10_sp.                | 0.00<br>029<br>466<br>518<br>8 | 9.33<br>466<br>E-<br>05 | Actinobacteriota_MB-A2-108_uncultured_bacterium      | 0 | 0 | Caulobacteraceae_uncultured_sp.                   | 0.00<br>037<br>123      | 0.00<br>011<br>011<br>739<br>3 |
| Pleomorphomonas_uncultured_bacterium        | 0.0<br>004<br>721 | 0.0<br>001<br>493<br>2 | Dermabacter_sp.                                | 0.00<br>021<br>015<br>6 | 6.64<br>572<br>E-<br>05 | ASV_7974                                            | 0.00<br>034<br>004<br>4 | 0.00<br>010<br>753<br>1  | WPS-2_metagenome                               | 0.00<br>029<br>466<br>518<br>8 | 9.33<br>466<br>E-<br>05 | Actinobacteriota_MB-A2-108uncultured_actinobacterium | 0 | 0 | Kiritimatiellae_WCH-B1-41unidentified_rumen       | 0.00<br>037<br>123      | 0.00<br>011<br>011<br>739<br>3 |
| ASV_3531                                    | 0.0<br>004<br>567 | 0.0<br>001<br>444<br>3 | SB-5_uncultured_Bacteroidetes                  | 0.00<br>021<br>015<br>6 | 0                       | Dorea_uncultured_Dorea                              | 0.00<br>034<br>004<br>4 | 0.00<br>010<br>753<br>1  | ASV_15821                                      | 0.00<br>028<br>960<br>3        | 9.15<br>805<br>E-<br>05 | Actinomadura_sp.                                     | 0 | 0 | Panacagrimonas_uncultured_bacterium               | 0.00<br>037<br>123      | 0.00<br>011<br>011<br>739<br>3 |
| ASV_8725                                    | 0.0<br>004<br>567 | 0.0<br>001<br>444<br>3 | Christensenellaceae_R-7_group_sp.              | 0.00<br>020<br>727<br>5 | 6.55<br>461<br>E-<br>05 | Gammaproteobacteria_CHAB-XI-27_uncultured_bacterium | 0.00<br>034<br>004<br>4 | 0.00<br>010<br>753<br>1  | Chroococcidiopsaceae_uncultured_cyanobacterium | 0.00<br>028<br>960<br>3        | 9.15<br>805<br>E-<br>05 | Actinomycetes_uncultured_bacterium                   | 0 | 0 | Phytophthora_agathidica                           | 0.00<br>037<br>123      | 0.00<br>011<br>011<br>739<br>3 |
| Cytophaga_xylanolytica_group_sp.            | 0.0<br>004<br>567 | 0.0<br>001<br>444<br>3 | Peptococcus_sp.                                | 0.00<br>019<br>936<br>2 | 6.30<br>438<br>E-<br>05 | Hallangium_uncultured_sludge                        | 0.00<br>034<br>004<br>4 | 0.00<br>010<br>753<br>1  | Confluentibacter_sp.                           | 0.00<br>028<br>960<br>3        | 9.15<br>805<br>E-<br>05 | Actinomycetes_dentalis                               | 0 | 0 | Rhizobiaceae_metagenome                           | 0.00<br>037<br>123      | 0.00<br>011<br>011<br>739<br>3 |
| Genmatimonas_phototrophica                  | 0.0<br>004<br>428 | 0.0<br>001<br>400<br>5 | ASV_12382                                      | 0.00<br>019<br>794<br>5 | 6.25<br>957<br>E-<br>05 | Bacteroidia_uncultured_metagenome                   | 0.00<br>033<br>721<br>1 | 0.00<br>010<br>663<br>5  | Corynebacterium_glutamicum                     | 0.00<br>028<br>960<br>3        | 9.15<br>805<br>E-<br>05 | Actinomycetes_graevenitzi                            | 0 | 0 | Tyzzerella_uncultured_Eubacteriaceae              | 0.00<br>037<br>123      | 0.00<br>011<br>011<br>739<br>3 |
| Planctomycetes_uncultured_Planctomycetes    | 0.0<br>004<br>428 | 0.0<br>001<br>400<br>5 | Oligoflexia_0319-6G20_uncultured_organism      | 0.00<br>019<br>794<br>5 | 6.25<br>957<br>E-<br>05 | Candidatus_Uhrbacteria                              | 0.00<br>033<br>721<br>1 | 0.00<br>010<br>663<br>5  | Quadrifera_uncultured_bacterium                | 0.00<br>028<br>960<br>3        | 9.15<br>805<br>E-<br>05 | Actinomycetes_sp.                                    | 0 | 0 | Williamsia_sp.                                    | 0.00<br>037<br>123      | 0.00<br>011<br>011<br>739<br>3 |
| Plantibacter_sp.                            | 0.0<br>004<br>428 | 0.0<br>001<br>400<br>5 | Mitochondria_Eukaryota_sp.                     | 0.00<br>019<br>216      | 6.07<br>663<br>E-<br>05 | Nitrosomonadaceae_966-1_metagenome                  | 0.00<br>033<br>482<br>4 | 0.00<br>010<br>588<br>1  | ASV_20321                                      | 0.00<br>028<br>750<br>1        | 9.09<br>158<br>E-<br>05 | Actinomycetes_unidentified                           | 0 | 0 | Candidatus_Bealeia_uncultured_Alphaproteobacteria | 0.00<br>036<br>921<br>6 | 0.00<br>011<br>011<br>675<br>6 |
| Lactobacillales_P5D1-392Granulicatella_sp.  | 0.0<br>004<br>000 | 0.0<br>001<br>397<br>8 | ASV_2862                                       | 0.00<br>018<br>693<br>8 | 5.91<br>15E-<br>05      | Rudanelia_uncultured_bacterium                      | 0.00<br>033<br>482<br>4 | 0.00<br>010<br>588<br>1  | Hypnocyclus_sp.                                | 0.00<br>028<br>750<br>1        | 9.09<br>158<br>E-<br>05 | Actinomycetaceae_uncultured_bacterium                | 0 | 0 | Oceanobacter_sp.                                  | 0.00<br>036<br>921<br>6 | 0.00<br>011<br>011<br>675<br>6 |
| ASV_2862                                    | 0.0<br>004<br>389 | 0.0<br>000<br>935<br>4 | Megasphaera_sp.                                | 0.00<br>018<br>693<br>8 | 5.91<br>15E-<br>05      | Rummelbaciillus_sp.                                 | 0.00<br>033<br>379<br>4 | 0.00<br>010<br>555<br>4  | Schaalia_odontolytica                          | 0.00<br>028<br>829<br>1        | 8.99<br>829<br>E-<br>05 | Actinomycetaceae_uncultured_metagenome               | 0 | 0 | ASV_14099                                         | 0.00<br>034<br>268<br>7 | 0.00<br>010<br>010<br>836<br>7 |
| Candidatus_Limnoluna_uncultured_bacterium   | 0.0<br>004<br>378 | 0.0<br>001<br>100<br>6 | Chitinophagaceae_uncultured_bacterium          | 0.00<br>018<br>388<br>6 | 5.81<br>499<br>E-<br>05 | ASV_3026                                            | 0.00<br>032<br>302<br>3 | 0.00<br>010<br>214<br>9  | Candidatus_Campbellia                          | 0.00<br>028<br>208<br>7        | 8.92<br>037<br>E-<br>05 | Actinomycetaceae_uncultured_rumen                    | 0 | 0 | MBNT15_sp.                                        | 0.00<br>034<br>268<br>7 | 0.00<br>010<br>010<br>836<br>7 |
| ASV_16382                                   | 0.0<br>004<br>351 | 0.0<br>001<br>376<br>6 | DEV114_uncultured_bacterium                    | 0.00<br>018<br>388<br>6 | 5.81<br>499<br>E-<br>05 | Candidatus_Korneliibacteria_uncultured_bacterium    | 0.00<br>032<br>302<br>3 | 0.00<br>010<br>214<br>9  | Fibrobacteriales_sp.                           | 0.00<br>028<br>208<br>7        | 8.92<br>037<br>E-<br>05 | Actinomycetaceae_uncultured_sp.                      | 0 | 0 | ASV_2303                                          | 0.00<br>033<br>564<br>9 | 0.00<br>010<br>010<br>614<br>2 |
| Proteiniphilum_uncultured_prokaryote        | 0.0<br>004<br>351 | 0.0<br>000<br>000<br>6 | Escherichia-Shigella_sp.                       | 0.00<br>018<br>388<br>6 | 5.81<br>499<br>E-<br>05 | Edaphobaculum_Chitinophagaceae_bacterium            | 0.00<br>032<br>302<br>3 | 0.00<br>010<br>214<br>9  | Mitsuokella_sp.                                | 0.00<br>028<br>208<br>7        | 8.92<br>037<br>E-<br>05 | Actinomycetospores                                   | 0 | 0 | ASV_5218                                          | 0.00<br>033<br>564<br>9 | 0.00<br>010<br>010<br>614<br>2 |
| Tolypothrix_sp.                             | 0.0<br>004<br>351 | 0.0<br>000<br>000<br>6 | ASV_21806                                      | 0.00<br>018<br>303<br>3 | 5.78<br>801<br>E-<br>05 | ASV_9126                                            | 0.00<br>031<br>512<br>8 | 0.00<br>010<br>522<br>05 | Pleurocapsa_PCC-7319_sp.                       | 0.00<br>028<br>208<br>7        | 8.92<br>037<br>E-<br>05 | Actinoplanes_garbadinensis                           | 0 | 0 | Parapodobacter_sp.                                | 0.00<br>033<br>044<br>2 | 0.00<br>010<br>010<br>449<br>5 |
| Gammaproteobacteria_EV818SWAP88_sp.         | 0.0<br>004<br>298 | 0.0<br>001<br>359<br>7 | Bacteroidetes_BD2-2_Bacteroidetes_bacterium    | 0.00<br>018<br>303<br>3 | 5.78<br>801<br>E-<br>05 | Xanthomonadaceae_uncultured_Luteimonas_sp.          | 0.00<br>031<br>512<br>8 | 0.00<br>010<br>522<br>05 | Saccharibacillus_deserti                       | 0.00<br>028<br>208<br>7        | 8.92<br>037<br>E-<br>05 | Actinoplanes_sp.                                     | 0 | 0 | Reichenbachiaella_uncultured_bacterium            | 0.00<br>033<br>044<br>2 | 0.00<br>010<br>010<br>449<br>5 |
| Cnuella_uncultured_organism                 | 0.0<br>004<br>263 | 0.0<br>001<br>348<br>2 | Candidatus_Megaira_uncultured_bacterium        | 0.00<br>018<br>303<br>3 | 5.78<br>801<br>E-<br>05 | Cellvibrio_uncultured_Cellvibrio                    | 0.00<br>031<br>329<br>9 | 0.00<br>010<br>095<br>05 | Sanguibacter_sp.                               | 0.00<br>028<br>208<br>7        | 8.92<br>037<br>E-<br>05 | Actinotalea_sp.                                      | 0 | 0 | Saprosiraceae_uncultured_Sargassum_vachellianum   | 0.00<br>033<br>044<br>2 | 0.00<br>010<br>010<br>449<br>5 |
| KI89A_clade_sp.                             | 0.0<br>004<br>263 | 0.0<br>001<br>348<br>2 | Leeia_uncultured_bacterium                     | 0.00<br>018<br>303<br>3 | 5.78<br>801<br>E-<br>05 | Bacteroidia_uncultured_Bacteroidales                | 0.00<br>030<br>213<br>8 | 0.00<br>010<br>444<br>05 | Tolomonas_sp.                                  | 0.00<br>028<br>208<br>7        | 8.92<br>037<br>E-<br>05 | Actinotignum_sp.                                     | 0 | 0 | ASV_7299                                          | 0.00<br>030<br>595<br>4 | 0.00<br>010<br>010<br>307<br>4 |
| Microscillaceae_uncultured_prokaryote       | 0.0<br>004<br>263 | 0.0<br>001<br>348<br>2 | Peredibacter_uncultured_delta                  | 0.00<br>018<br>303<br>3 | 5.78<br>801<br>E-<br>05 | Saccharimonadales_TM7a_sp.                          | 0.00<br>030<br>213<br>8 | 0.00<br>010<br>444<br>05 | Dendrosporobacter_unidentified_eubacterium     | 0.00<br>027<br>906<br>5        | 8.82<br>465<br>E-<br>05 | Adhaeribacter_metagenome                             | 0 | 0 | Legionella_drancourtii                            | 0.00<br>032<br>296<br>5 | 0.00<br>010<br>010<br>213<br>1 |
| Rhodanobacteraceae_uncultured_metagenome    | 0.0<br>004<br>263 | 0.0<br>007<br>764<br>3 | Verrucomicrobiaceae_uncultured_bacterium       | 0.00<br>018<br>303<br>3 | 0                       | SJA-28uncultured_Chlorobi                           | 0.00<br>030<br>213<br>8 | 0.00<br>010<br>444<br>05 | Rhizorhapis_uncultured_Sphingomonas            | 0.00<br>027<br>906<br>5        | 8.82<br>465<br>E-<br>05 | Adhaeribacter_uncultured_soil                        | 0 | 0 | Candidatus_Captivus                               | 0.00<br>031<br>886<br>7 | 0.00<br>010<br>010<br>083<br>5 |
| ASV_6710                                    | 0.0<br>004<br>174 | 0.0<br>001<br>320<br>2 | Algibacter_sp.                                 | 0.00<br>017<br>995      | 5.69<br>052<br>E-<br>05 | Undibacterium_sp.                                   | 0.00<br>030<br>213<br>8 | 0.00<br>010<br>444<br>05 | Candidatus_Jidaibacter_uncultured_bacterium    | 0.00<br>027<br>440<br>3        | 8.67<br>738<br>E-<br>05 | Adhaeribacter_sp.                                    | 0 | 0 | Acidimicrobia_uncultured_actinobacterium          | 0.00<br>031<br>154<br>8 | 9.85<br>201<br>E-<br>05        |
| Microscillaceae_OLB12_sp.                   | 0.0<br>004<br>174 | 0.0<br>001<br>320<br>2 | Ferruginibacter_uncultured_Sphingobacteriales  | 0.00<br>017<br>995      | 5.69<br>052<br>E-<br>05 | Catonella_uncultured_bacterium                      | 0.00<br>029<br>543<br>3 | 0.00<br>010<br>241<br>05 | Clostridium_sensu_stricto_9_sp.                | 0.00<br>027<br>440<br>3        | 8.67<br>738<br>E-<br>05 | Advenella_sp.                                        | 0 | 0 | ASV_15920                                         | 0.00<br>030<br>497<br>1 | 9.64<br>403<br>E-<br>05        |
| Edaphobaculum_sp.                           | 0.0<br>004<br>152 | 0.0<br>001<br>313<br>2 | Babelia_sp.                                    | 0.00<br>017<br>593<br>2 | 5.56<br>346<br>E-<br>05 | Flavobacterium_uncultured_Bacteroidetes             | 0.00<br>029<br>543<br>3 | 0.00<br>010<br>241<br>05 | Rothia_mucluginosa                             | 0.00<br>027<br>440<br>3        | 8.67<br>738<br>E-<br>05 | Aenigmarchaeales_sp.                                 | 0 | 0 | ASV_5084                                          | 0.00<br>030<br>497<br>1 | 9.64<br>403<br>E-<br>05        |
| ASV_8328                                    | 0.0<br>004<br>129 | 0.0<br>001<br>305<br>5 | Caenarcaniphilales_uncultured_bacterium        | 0.00<br>017<br>593<br>2 | 5.56<br>346<br>E-<br>05 | ASV_13680                                           | 0.00<br>028<br>891<br>3 | 0.00<br>010<br>913<br>05 | Entomoplasmatales_bacterium                    | 0.00<br>027<br>404<br>8        | 8.66<br>616<br>E-<br>05 | Aenigmarchaeota_sp.                                  | 0 | 0 | Bdellovibrio_bacteriovorus                        | 0.00<br>030<br>497<br>1 | 9.64<br>403<br>E-<br>05        |

|                                                                |           |          |                                                  |           |             |                                                 |           |             |                                                       |           |             |                                                 |   |   |                                                   |            |             |
|----------------------------------------------------------------|-----------|----------|--------------------------------------------------|-----------|-------------|-------------------------------------------------|-----------|-------------|-------------------------------------------------------|-----------|-------------|-------------------------------------------------|---|---|---------------------------------------------------|------------|-------------|
| Candidatus_Amesbacteria_uncultured_soil                        | 0.0004144 | 0.000301 | ASV_15723                                        | 0.0016357 | 5.17257E-05 | Fimbrigliobus_metagenome                        | 0.0022881 | 9.13623E-05 | Simkaniaceae_uncultured_Rhabdochlamydiaceae_bacterium | 0.0020709 | 8.66616E-05 | Aequorivita_sp.                                 | 0 | 0 | Brachybacterium_sp.                               | 0.00030497 | 9.64403E-05 |
| Trichuris_trichiura                                            | 0.0004114 | 0.000000 | Blastocatella_sp.                                | 0.0016357 | 5.17257E-05 | Fluviicola_uncultured_Fluxibacter               | 0.0022881 | 9.13623E-05 | ASV_21042                                             | 0.0020620 | 8.28545E-05 | Aerococcaceae_sp.                               | 0 | 0 | Myxococcaceae_P3OB-42_uncultured_bacterium        | 0.00030497 | 9.64403E-05 |
| ASV_9657                                                       | 0.0004030 | 0.000274 | Corynebacterium_glucuronolyticum                 | 0.0016357 | 5.17257E-05 | lamia_metagenome                                | 0.0022881 | 9.13623E-05 | ASV_2386                                              | 0.0020620 | 8.28545E-05 | Aerococcaceae_uncultured_bacterium              | 0 | 0 | Saccharimonadales_LWQ8_sp.                        | 0.00030497 | 9.64403E-05 |
| Saccharimonadaeae_metagenome                                   | 0.0003929 | 0.000000 | Fokiales_uncultured_bacterium                    | 0.0016357 | 5.17257E-05 | Salinireps_sp.                                  | 0.0022881 | 9.13623E-05 | ASV_3639                                              | 0.0020620 | 8.28545E-05 | Aerococcus_sp.                                  | 0 | 0 | oc32_uncultured_bacterium                         | 0.00030208 | 9.55273E-05 |
| Caulobacter_metagenome                                         | 0.0003901 | 0.00072  | Ilumatobacteraceae_uncultured_marine             | 0.0016357 | 5.17257E-05 | Dysgonomonadaeae_uncultured_bacterium           | 0.0022881 | 8.88108E-05 | Bacillaceae_sp.                                       | 0.0020620 | 8.28545E-05 | Aeromicrobium_sp.                               | 0 | 0 | 009E01-B-SD-P15_uncultured_bacterium              | 0.00028641 | 9.05708E-05 |
| ASV_8696                                                       | 0.0003003 | 0.000233 | ASV_14118                                        | 0.0016357 | 5.17257E-05 | Subgroup_7_sp.                                  | 0.0022881 | 8.88108E-05 | Nitrosomonadaeae_Elfin6067_uncultured_bacterium       | 0.0020620 | 8.28545E-05 | Aeromonas_metagenome                            | 0 | 0 | ASV_21679                                         | 0.00028641 | 9.05708E-05 |
| Blastocatellaceae_uncultured_bacterium                         | 0.0003900 | 0.000233 | Acholeplasmataceae_EMP-G18_uncultured_Mollicutes | 0.0016357 | 4.98761E-05 | ASV_20307                                       | 0.0022881 | 8.78595E-05 | Arobacter_cryaeophilus                                | 0.0020620 | 8.02241E-05 | Aeromonas_sp.                                   | 0 | 0 | Candidatus_Anammoximicrobium_uncultured_soil      | 0.00028641 | 9.05708E-05 |
| ASV_2910                                                       | 0.0003003 | 0.000205 | Babeliales_uncultured_Candidatus                 | 0.0016357 | 4.43014E-05 | Solirubrobacter_sp.                             | 0.0022881 | 8.78595E-05 | ASV_13391                                             | 0.0020620 | 8.02241E-05 | Aeromonas_uncultured_gamma                      | 0 | 0 | Clostridium_sensu_stricto_13_sp.                  | 0.00028641 | 9.05708E-05 |
| ASV_2249                                                       | 0.0003003 | 0.000859 | Shinella_sp.                                     | 0.0016357 | 0           | Weissella_sp.                                   | 0.0022881 | 8.78595E-05 | Solobacterium_moorei                                  | 0.0020620 | 7.89042E-05 | Aerosphaera_uncultured_bacterium                | 0 | 0 | Plantibacter_sp.                                  | 0.00028641 | 9.05708E-05 |
| ASV_3803                                                       | 0.0003003 | 0.00194  | Chloroplast_Guillardia_theta                     | 0.0016357 | 4.15013E-05 | Acidimicrobia_uncultured_Actinomycetales        | 0.0022881 | 8.71957E-05 | Streptococcus_mutans                                  | 0.0020620 | 7.89042E-05 | Aerosphaera_sp.                                 | 0 | 0 | Singulisphaera_metagenome                         | 0.00028641 | 9.05708E-05 |
| Turicibacter_sp.                                               | 0.0003003 | 0.000777 | Anaerolineae_1-20uncultured_Chloroflexia         | 0.0016357 | 3.98012E-05 | ASV_2889                                        | 0.0022881 | 8.71957E-05 | Alysiella_sp.                                         | 0.0020620 | 7.88852E-05 | Aestuariaella_uncultured_bacterium              | 0 | 0 | Woesearchaeales_uncultured_euryarchaeote          | 0.00028641 | 9.05708E-05 |
| Algoriphagus_uncultured_Hongiella                              | 0.0003003 | 0.00179  | Geobacteraceae_uncultured_sp.                    | 0.0016357 | 4.15011E-05 | Rhodospirillaceae_uncultured_Magnetospirillum   | 0.0022881 | 8.71957E-05 | ASV_12880                                             | 0.0020620 | 7.88852E-05 | Afiplia_genosp.                                 | 0 | 0 | ASV_413                                           | 0.00028641 | 9.02204E-05 |
| ASV_5713                                                       | 0.0003003 | 0.00179  | Hydrogenophilus_sp.                              | 0.0016357 | 4.15011E-05 | Turicella_uncultured_bacterium                  | 0.0022881 | 8.71957E-05 | Dongia_metagenome                                     | 0.0020620 | 7.88852E-05 | Afiplia_sp.                                     | 0 | 0 | CL500-29_marine_group_uncultured_Acidimicrobiales | 0.00028641 | 9.02204E-05 |
| Candidatus_Bacilloplasma_sp.                                   | 0.0003003 | 0.00179  | ASV_18112                                        | 0.0016357 | 3.69011E-05 | Dolosigranulum_sp.                              | 0.0022881 | 8.60203E-05 | Fluviicoccus_metagenome                               | 0.0020620 | 7.88852E-05 | Agathobacter_sp.                                | 0 | 0 | Chloroflexi_OLB13_uncultured_bacterium            | 0.00027938 | 8.83496E-05 |
| Steroidobacterium_Mi-37                                        | 0.0003003 | 0.000730 | ASV_17387                                        | 0.0016357 | 3.41010E-05 | Gaiellales_uncultured_d_organism                | 0.0022881 | 8.60203E-05 | Pedomicrobium_uncultured_Pedomicrobium                | 0.0020620 | 7.88852E-05 | Aggregatibacter_sp.                             | 0 | 0 | Diplorickettsia_uncultured_bacterium              | 0.00027842 | 8.80448E-05 |
| ASV_9586                                                       | 0.0003003 | 0.00164  | Cryomorphaceae_sp.                               | 0.0016357 | 3.41010E-05 | Kintimatiellaceae_M_SBL3_uncultured_bacterium   | 0.0022881 | 8.60203E-05 | ASV_2862                                              | 0.0020620 | 7.84975E-05 | Agitococcus_lubricus_group_uncultured_bacterium | 0 | 0 | Lachnospiraceae_uncultured_rumen                  | 0.00027842 | 8.80448E-05 |
| Flavobacterium_chenia                                          | 0.0003003 | 0.00164  | Anaerolineae_UCG_001_uncultured_bacterium        | 0.0016357 | 3.32010E-05 | ASV_9616                                        | 0.0022881 | 8.33026E-05 | Bordetella_sp.                                        | 0.0020620 | 7.84975E-05 | Agitococcus_lubricus_group_sp.                  | 0 | 0 | Neisseriaceae_uncultured_metagenome               | 0.00027842 | 8.80448E-05 |
| Anoxybacillus_sp.                                              | 0.0003003 | 0.00160  | ASV_19465                                        | 0.0016357 | 3.32010E-05 | Nostoc_PCC-73102_sp.                            | 0.0022881 | 8.33026E-05 | Dermabacter_sp.                                       | 0.0020620 | 7.61394E-05 | Agrococcus_sp.                                  | 0 | 0 | Peredibacter_metagenome                           | 0.00027842 | 8.80448E-05 |
| Nevskia_uncultured_bacterium                                   | 0.0003003 | 0.00160  | Chloroplast_Prasidolopsis_sp.                    | 0.0016357 | 3.32010E-05 | Oligoflexia_0319-6G20_uncultured_marine         | 0.0022881 | 8.33026E-05 | Holosporaceae_uncultured_metagenome                   | 0.0020620 | 7.09451E-05 | Agromyces_sp.                                   | 0 | 0 | Syntrophomonas_sp.                                | 0.00027842 | 8.80448E-05 |
| Candidatus_Kaiserbacteria_sp.                                  | 0.0003003 | 0.00120  | Lactobacillus_iners                              | 0.0016357 | 3.32010E-05 | Chloroplast_Castanea_mollissima                 | 0.0022881 | 8.09025E-05 | Hypomicrobium_uncultured_Hypomicrobiales              | 0.0020620 | 7.09451E-05 | Ahniella_affigens                               | 0 | 0 | ASV_2103                                          | 0.00027693 | 8.75693E-05 |
| Corynebacterium_glutamicum                                     | 0.0003003 | 0.00120  | Dyadobacter_metagenome                           | 9.34689   | 2.95575E-05 | ASV_1837                                        | 0.0022881 | 7.77595E-05 | Gemmataceae_uncultured_Plantomycetales                | 0.0020620 | 6.92175E-05 | Ahniella_metagenome                             | 0 | 0 | ASV_9331                                          | 0.00027693 | 8.75693E-05 |
| Nordella_oligomobilis                                          | 0.0003003 | 0.00146  | FCPU426_sp.                                      | 9.34689   | 2.95575E-05 | Coriobacteria_OPB41uncultured_Coriobacteriaceae | 0.0022881 | 7.77595E-05 | Opitutus_uncultured_Verrucomicrobia                   | 0.0020620 | 6.92175E-05 | Ahniella_uncultured_bacterium                   | 0 | 0 | Mitochondria_marine_metagenome                    | 0.00027693 | 8.75693E-05 |
| Bradyrhizobium_sp.                                             | 0.0003003 | 0.00143  | K189A_clade_uncultured_bacterium                 | 0.00208   | 2.84526E-05 | Elusimicrobia_MVP-88uncultured_delta            | 0.0022881 | 7.77595E-05 | Candidatus_Magasaniakbacteria_uncultured_plantomycete | 0.0020620 | 6.81869E-05 | Akkermansia_sp.                                 | 0 | 0 | Ancalomicrobium_sp.                               | 0.00027278 | 8.62619E-05 |
| Clostridioides_sp.                                             | 0.0003003 | 0.00143  | Uruburuella_sp.                                  | 0.00208   | 0           | Fimbrigliobus_Gemmata_sp.                       | 0.0022881 | 7.77595E-05 | Acholeplasma_uncultured_bacterium                     | 0.0020620 | 6.54146E-05 | Akkermansia_uncultured_bacterium                | 0 | 0 | ASV_6422                                          | 0.00027278 | 8.62619E-05 |
| Gracilbacteria_JGI_000069-P22_uncultured_Epsilonproteobacteria | 0.0003003 | 0.00143  | Actinobacteriota_MB-A2-108_metagenome            | 7.88084   | 2.49214E-05 | Rhodocyclus_Z-35_uncultured_bacterium           | 0.0022881 | 7.77595E-05 | Chloroplast_Guillardia_theta                          | 0.0020620 | 6.54146E-05 | Alcaligenaceae_sp.                              | 0 | 0 | Fusobacterium_gut_metagenome                      | 0.00027278 | 8.62619E-05 |
| Silvanigrella_sp.                                              | 0.0003003 | 0.00143  | ASV_20641                                        | 7.88084   | 2.49214E-05 | ASV_17351                                       | 0.0022881 | 7.66119E-05 | Demequina_uncultured_bacterium                        | 0.0020620 | 6.54146E-05 | Alcaligenes_sp.                                 | 0 | 0 | Fimbrimonadaeae_sp.                               | 0.00026387 | 8.50136E-05 |
| Actinobacteria_0319-7L14_uncultured_actinobacterium            | 0.0003003 | 0.00143  | ASV_5322                                         | 0.00207   | 2.27621E-05 | ASV_17352                                       | 0.0022881 | 7.66119E-05 | LD29_uncultured_Xiphinematobacteriaceae               | 0.0020620 | 6.54146E-05 | Algibacter_sp.                                  | 0 | 0 | Saccharimonadales_WWH38_uncultured_soil           | 0.00026387 | 8.50136E-05 |
| Ahniella_uncultured_bacterium                                  | 0.0003003 | 0.00143  | Caproiciproducens_sp.                            | 0.00207   | 2.27621E-05 | ASV_3630                                        | 0.0022881 | 7.66119E-05 | ASV_2850                                              | 0.0020620 | 3.46359E-05 | Algoriphagus_sp.                                | 0 | 0 | Corynebacterium_ammocatum                         | 0.00026387 | 8.2981E-05  |
| ASV_19671                                                      | 0.0003003 | 0.00143  | Neochlamydia_sp.                                 | 0.00207   | 2.27621E-05 | Christensenellaceae_uncultured_bacterium        | 0.0022881 | 7.47023E-05 | ASV_15298                                             | 0.0020620 | 6.41295E-05 | Algoriphagus_uncultured_Bacteroidetes           | 0 | 0 | Diplorickettsiaceae_ssp.                          | 0.00026387 | 8.2981E-05  |
| Candidatus_Planktophila_sp.                                    | 0.0003003 | 0.00143  | Candidatus_Omnitrophus_bioreactor_metagenome     | 7.01016   | 2.21681E-05 | Clostridia_uncultured_sp.                       | 0.0022881 | 7.47023E-05 | Chloroplast_Sarcinofilum_mucosum                      | 0.0020620 | 6.41295E-05 | Algoriphagus_uncultured_Hongiella               | 0 | 0 | Gammaproteobacteria_Ga0077536_sp.                 | 0.00026387 | 8.2981E-05  |

|                                               |             |            |                                                             |             |             |                                                  |             |             |                                                  |             |             |                                           |   |   |                                                     |             |             |
|-----------------------------------------------|-------------|------------|-------------------------------------------------------------|-------------|-------------|--------------------------------------------------|-------------|-------------|--------------------------------------------------|-------------|-------------|-------------------------------------------|---|---|-----------------------------------------------------|-------------|-------------|
| DEV008_metagenome                             | 0.00034106  | 0.00010785 | Chitinophagales_37-13_Bacteroidetes_bacterium               | 7.01016E-05 | 2.21681E-05 | Kapabacteriales_sp.                              | 0.0002363   | 7.47392E-05 | Clostridiales_uncultured_Bacillus                | 0.000202953 | 6.41794E-05 | Aliidomarina_uncultured_bacterium         | 0 | 0 | ASV_4563                                            | 0.000259623 | 8.21E-05    |
| Margulisbacteria_uncultured_Gram-positive     | 0.00034106  | 0.00010785 | Naumannella_sp.                                             | 7.01016E-05 | 2.21681E-05 | Schaalia_radingae                                | 0.000228383 | 7.221E-05   | Terriglobus_sp.                                  | 0.000202953 | 6.41794E-05 | Aliidongia_dinghuensis                    | 0 | 0 | Pseudoramibacter_uncultured_bacterium               | 0.000259623 | 8.21E-05    |
| Paraprevotella_clara                          | 0.00034106  | 0.00010785 | Planctomycetota_OM190_uncultured_bacterium                  | 7.01016E-05 | 2.21681E-05 | alphaproteobacteria_uncultured_bacterium         | 0.000226603 | 7.1652E-05  | Treponema_zuelzeriae                             | 0.000202953 | 6.41794E-05 | Aliivibrio_sp.                            | 0 | 0 | Anaerofustis_uncultured_bacterium                   | 0.000247985 | 7.84197E-05 |
| Taibaiella_sp.                                | 0.00034106  | 0.00010785 | Plantibacter_sp.                                            | 7.01016E-05 | 2.21681E-05 | Oscillospiraceae_UCG_005_uncultured_rumen        | 0.000226603 | 7.1652E-05  | Acetivibrio_uncultured_bacterium                 | 0.000199566 | 6.31083E-05 | Alishevanella_sp.                         | 0 | 0 | Chloroflexia_JG30-KF-CM66_metagenome                | 0.000247985 | 7.84197E-05 |
| Thermoleophilia_uncultured_actinobacterium    | 0.00034106  | 0.00010785 | Solirubrobacterales_67-14_metagenome                        | 7.01016E-05 | 0           | Paludibacteraceae_sp.                            | 0.000226603 | 7.1652E-05  | ASV_14706                                        | 0.000199566 | 6.31083E-05 | Alishevanella_uncultured_bacterium        | 0 | 0 | Clostridium_sensu_stricto_12_uncultured_Clostridium | 0.000247985 | 7.84197E-05 |
| Unknown_Family_sp.                            | 0.00034106  | 0.00010785 | ASV_21025                                                   | 0.000505    | 1.70715E-05 | Phaselocystis_metagenome                         | 0.000226603 | 7.1652E-05  | Chitinophagaceae_uncultured_bacterium            | 0.000199566 | 6.31083E-05 | Alistipes_gut_metagenome                  | 0 | 0 | Gastranaerophilales_uncultured_rumen                | 0.000247985 | 7.84197E-05 |
| Candidatus_HepaticolaCandidatus_Hepaticola    | 0.000322405 | 0.00010195 | Bdellovibrionaceae_OM27_clade_uncultured_bacterium          | 0.000505    | 1.70715E-05 | Rickettsiales_SM2D12_uncultured_bacterium        | 0.000226603 | 7.1652E-05  | Flavobacteriaceae_sp.                            | 0.000199566 | 6.31083E-05 | Alistipes_sp.                             | 0 | 0 | Bifidobacterium_sp.                                 | 0.000247985 | 7.84197E-05 |
| ASV_10170                                     | 0.00032118  | 0.00010157 | Lentimicrobiaceae_wastewater_metagenome                     | 0.000505    | 1.70715E-05 | Sandaracinaceae_uncultured_bacterium             | 0.000226603 | 7.1652E-05  | Sphingobacteriales_FFCH9454_metagenome           | 0.000199566 | 6.31083E-05 | Alistipes_uncultured_Alistipes            | 0 | 0 | Deinococcus_sp.                                     | 0.000247985 | 7.84197E-05 |
| Desulfomicrobium_sp.                          | 0.00032118  | 0.00010157 | Anaerovorax_uncultured_bacterium                            | 5.25389E-05 | 1.66143E-05 | Simkaniaceae_uncultured_bacterium                | 0.000226603 | 7.1652E-05  | ASV_13773                                        | 0.000199566 | 6.31083E-05 | Alistipes_uncultured_bacterium            | 0 | 0 | ASV_4527                                            | 0.000247985 | 7.84197E-05 |
| LIUU-11-161_sp.                               | 0.00032118  | 0.00010157 | Gaiellales_sp.                                              | 5.25389E-05 | 1.66143E-05 | Solirubrobacteriales_bacterium                   | 0.000226603 | 7.1652E-05  | ASV_13775                                        | 0.000199566 | 6.31083E-05 | Alistipes_uncultured_Bacteroidetes        | 0 | 0 | Pirellula_uncultured_soil                           | 0.000247985 | 7.84197E-05 |
| ASV_9591                                      | 0.000319209 | 0.00010095 | Peptoniphilus_sp.                                           | 5.25389E-05 | 1.66143E-05 | Akkermansia_uncultured_bacterium                 | 0.000226603 | 7.1652E-05  | Fusibacteruncultured_porkaryote                  | 0.000199566 | 6.31083E-05 | Aliterella_cyanobacterium_OU_20           | 0 | 0 | ASV_2862                                            | 0.000234955 | 7.84197E-05 |
| Chroococcidiopsaceae_uncultured_bacterium     | 0.000319209 | 0.00010095 | Thermoleophilia_uncultured_metagenome                       | 5.25389E-05 | 1.66143E-05 | Chloroflexi_TK10_metagenome                      | 0.000226603 | 7.1652E-05  | Hirschia_sp.                                     | 0.000199566 | 6.31083E-05 | Aliterella_sp.                            | 0 | 0 | Chitinophagales_uncultured_bacterium                | 0.000234955 | 7.84197E-05 |
| ASV_2180                                      | 0.00031083  | 0.00010829 | ASV_6240                                                    | 4.67344E-05 | 1.47787E-05 | Chloroplast_Melosira_varians                     | 0.000226603 | 7.1652E-05  | Oligoflexia_0319-6G20_uncultured_Myxococcales    | 0.000199566 | 6.31083E-05 | Aliterella_uncultured_bacterium           | 0 | 0 | Cellvibrio_uncultured_Cellvibrio                    | 0.000234955 | 7.84197E-05 |
| bacterium_enrichment                          | 0.00031083  | 0.00010829 | Tessaracoccus_sp.                                           | 4.67344E-05 | 1.47787E-05 | Planctomycetes_Pla4_lineage_uncultured_bacterium | 0.000226603 | 7.1652E-05  | ASV_3352                                         | 0.000199566 | 6.31083E-05 | Alkalibacter_uncultured_bacterium         | 0 | 0 | Sulfuritalea_sp.                                    | 0.000228485 | 7.84197E-05 |
| Exiguobacterium_undae                         | 0.00031083  | 0.00010829 | Bacilli_RF39_uncultured_bacterium                           | 0.000303599 | 1.1381E-05  | Prevotella_gut_metagenome                        | 0.000226603 | 7.1652E-05  | ASV_5779                                         | 0.000199566 | 6.31083E-05 | Alkalibacterium_uncultured_bacterium      | 0 | 0 | Anaerolineae_sp.                                    | 0.000228485 | 7.84197E-05 |
| Halomonas_sp.                                 | 0.00031083  | 0.00010829 | Cellulosimicrobium_sp                                       | 0.000303599 | 1.1381E-05  | Butyrivibrionaceae_UCG_008_uncultured_bacterium  | 0.000226603 | 7.1652E-05  | ASV_7664                                         | 0.000199566 | 6.31083E-05 | Alkanibacter_metagenome                   | 0 | 0 | ASV_10995                                           | 0.000228485 | 7.84197E-05 |
| Rhodanobacteraceae_uncultured_bacterium       | 0.00031083  | 0.00010829 | Desulfuregula_uncultured_bacterium                          | 0.000303599 | 1.1381E-05  | Novosphingobium_rossa                            | 0.000226603 | 7.1652E-05  | Gemmata_uncultured_bacterium                     | 0.000199566 | 6.31083E-05 | Alkanindiges_sp.                          | 0 | 0 | Paludibacteraceae_uncultured_sp.                    | 0.000228485 | 7.84197E-05 |
| Weeksellaceae_uncultured_Chishuiella_sp.      | 0.00031083  | 0.00010829 | Oligoflexia_0319-6G20_uncultured_gamma                      | 0.000303599 | 1.1381E-05  | Gaiellales_sp.                                   | 0.000226603 | 7.1652E-05  | Gemmataceae_Zavarzinaella_uncultured_bacterium   | 0.000199566 | 6.31083E-05 | Alkanindiges_uncultured_bacterium         | 0 | 0 | Ferribacterium_sp.                                  | 0.000228485 | 7.84197E-05 |
| DEV008_uncultured_bacterium                   | 0.00030858  | 0.00010975 | Salinispira_uncultured_bacterium                            | 0.000303599 | 0           | Botryosphaeria_dothidea                          | 0.000226603 | 7.1652E-05  | Haliangium_uncultured_soil                       | 0.000199566 | 6.31083E-05 | Alkanindiges_uncultured_gamma             | 0 | 0 | ASV_11102                                           | 0.000228485 | 7.84197E-05 |
| Fokiaceae_uncultured_bacterium                | 0.00030858  | 0.00010975 | 009E01-B-SD-P15_uncultured_bacterium                        | 0           | 0           | Candidatus_Nomura_bacteria_marine_metagenome     | 0.000226603 | 7.1652E-05  | Muribaculaceae_uncultured_bacterium              | 0.000199566 | 6.31083E-05 | Allobranchiobius_sp.                      | 0 | 0 | ASV_11103                                           | 0.000228485 | 7.84197E-05 |
| Kapabacteriales_uncultured_bacterium          | 0.00030858  | 0.00010975 | 1013-28-CG33_uncultured_soil                                | 0           | 0           | Sphingopyxis_sp.                                 | 0.000226603 | 7.1652E-05  | Patesobacteriaceae_CPR2_uncultured_microorganism | 0.000199566 | 6.31083E-05 | Alloicoccus_uncultured_bacterium          | 0 | 0 | ASV_3026                                            | 0.000228485 | 7.84197E-05 |
| Oligoflexia_0319-6G20_uncultured_bacterium    | 0.00030858  | 0.00010975 | Abdiibacterium_sp.                                          | 0           | 0           | Acetobacteraceae_uncultured_bacterium            | 0.000226603 | 7.1652E-05  | Chloroplast_Pyramimonas_tetrahynchus             | 0.000199566 | 6.31083E-05 | Alloprevotella_rava                       | 0 | 0 | Beijerinckiaceae_1174-901-12_Rhizobiales_bacterium  | 0.000228485 | 7.84197E-05 |
| Sphingomonadaceae_uncultured_Sphingopyxis_sp. | 0.00030858  | 0.00010975 | Absonditabacteriales_(SR1)_metagenome                       | 0           | 0           | Rhodococcus_sp.                                  | 0.000226603 | 7.1652E-05  | Micropepsaceae_uncultured_bacterium              | 0.000199566 | 6.31083E-05 | Alloprevotella_sp.                        | 0 | 0 | Psychrobacter_sanguiinis                            | 0.000228485 | 7.84197E-05 |
| Acidibacter_uncultured_bacterium              | 0.00029824  | 0.00010943 | Absonditabacteriales_(SR1)_candidate_division               | 0           | 0           | Sphingobium_metagenome                           | 0.000226603 | 7.1652E-05  | Phreatobacter_sp.                                | 0.000199566 | 6.31083E-05 | Alloprevotella_uncultured_Bacteroidales   | 0 | 0 | Verrucomicrobia_bacterium                           | 0.000228485 | 7.84197E-05 |
| Oligoflexia_sp.                               | 0.00029824  | 0.00010943 | Absonditabacteriales_(SR1)_sp.                              | 0           | 0           | ASV_18573                                        | 0.000226603 | 7.1652E-05  | Vermiphilaceae_sp.                               | 0.000199566 | 6.31083E-05 | Alloprevotella_sp.                        | 0 | 0 | ASV_10179                                           | 0.000228485 | 7.84197E-05 |
| WPS-2_sp.                                     | 0.00029824  | 0.00010943 | Absonditabacteriales_(SR1)_SR1_bacterium                    | 0           | 0           | Leptotrichia_shahii                              | 0.000226603 | 7.1652E-05  | Cutibacterium_granulosum                         | 0.000199566 | 6.31083E-05 | allotenuales_AKIW781_uncultured_bacterium | 0 | 0 | ASV_1592                                            | 0.000228485 | 7.84197E-05 |
| Pajaroellobacteriumuncultured_Polyangaceae    | 0.00029559  | 0.00010934 | Absonditabacteriales_(SR1)_uncultured_candidate             | 0           | 0           | Chloroflexia_JG30-KF-CM70_uncultured_soil        | 0.000226603 | 7.1652E-05  | Isosphaeraceae_uncultured_bacterium              | 0.000199566 | 6.31083E-05 | alpha_proteobacterium                     | 0 | 0 | Actinomyetaceae_F0332unidentified                   | 0.000228485 | 7.84197E-05 |
| ASV_21009                                     | 0.000285492 | 0.00010902 | Absonditabacteriales_(SR1)_uncultured_Epsilonproteobacteria | 0           | 0           | Lactobacillus_mucosae                            | 0.000226603 | 7.1652E-05  | Armatimonadia_sp.                                | 0.000199566 | 6.31083E-05 | Alphaproteobacteria_bacterium             | 0 | 0 | Campylobacter_concivus                              | 0.000228485 | 7.84197E-05 |
| Caldilineaceae_uncultured_bacterium           | 0.000285492 | 0.00010902 | Absonditabacteriales_(SR1)_uncultured_organism              | 0           | 0           | Chloroflexia_JG30-KF-CM69_uncultured_soil        | 0.000226603 | 7.1652E-05  | Mucispilium_sp.                                  | 0.000199566 | 6.31083E-05 | Alphaproteobacteria_sp.                   | 0 | 0 | ASV_2249                                            | 0.000228485 | 7.84197E-05 |
| Staphylococcus_sp.                            | 0.000285492 | 0.00010902 | Absonditabacteriales_(SR1)_uncultured_prokaryote            | 0           | 0           | Halscomenobacter_uncultured_Halscomenobacter     | 0.000226603 | 7.1652E-05  | Paludisphaera_uncultured_bacterium               | 0.000199566 | 6.31083E-05 | alphaproteobacteria_uncultured_bacterium  | 0 | 0 | Candidatus_Ovatusbacter_sp.                         | 0.000228485 | 7.84197E-05 |

|                                                     |             |            |                                               |   |   |                                                        |             |             |                                                              |             |             |                                                            |   |   |                                              |             |             |
|-----------------------------------------------------|-------------|------------|-----------------------------------------------|---|---|--------------------------------------------------------|-------------|-------------|--------------------------------------------------------------|-------------|-------------|------------------------------------------------------------|---|---|----------------------------------------------|-------------|-------------|
| Chitinophaga_sp.                                    | 0.00028524  | 0.00006166 | ABY1_sp.                                      | 0 | 0 | Ruminiclostridium_m etagenome                          | 0.0001726   | 5.60545E-05 | Rhodanobacter_sp.                                            | 0.000175108 | 5.5374E-05  | Alphaproteobacteria_uncultured_bacterium                   | 0 | 0 | ASV_12862                                    | 0.00021853  | 6.38315E-05 |
| ASV_3443                                            | 0.00028331  | 0.00008959 | Acanthopleuribacter_ uncultured_bacterium     | 0 | 0 | Leptotrichia_hofstadii                                 | 0.000164987 | 5.21735E-05 | ASV_15707                                                    | 0.00017462  | 5.52197E-05 | Alphaproteobacteria_uncultured_metagenome                  | 0 | 0 | Bradymonadalesuncultured_organism            | 0.00021853  | 6.38315E-05 |
| Fibrobacteriales_B18_ uncultured_bacterium          | 0.00028331  | 0.00008959 | Acetitomaculum_ uncultured_bacterium          | 0 | 0 | Saccharimonadacea_ uncultured_bacterium                | 0.000164987 | 5.21735E-05 | Pararheinheimeria_soli                                       | 0.00017462  | 5.52197E-05 | Alphaproteobacteria_uncultured_sp.                         | 0 | 0 | Devosiaceae_uncultured_sp.                   | 0.00021853  | 6.38315E-05 |
| Hungateiclostridiaceae_ uncultured_metagenome       | 0.00028331  | 0.00008959 | Acetitomaculum_ uncultured_rumen              | 0 | 0 | Candidatus_Omnitrophus_ Omnitrophica_bacterium         | 0.000161512 | 5.10746E-05 | Achromatium_sp.                                              | 0.000165488 | 5.23319E-05 | Alphaproteobacteria_uncultured_Alphaproteobacteria         | 0 | 0 | Solibacillus_sp.                             | 0.0002139   | 6.38851E-05 |
| Microtrichaceae_IMCC26207_ uncultured_bacterium     | 0.00028331  | 0.00008959 | Acetitomaculum_sp.                            | 0 | 0 | Rhodovastum_metagenome                                 | 0.000161512 | 5.10746E-05 | ASV_19509                                                    | 0.000165488 | 5.23319E-05 | Alphaproteobacteria_uncultured_bacterium_enrichment        | 0 | 0 | Aeromonas_uncultured_gamma                   | 0.00019838  | 6.27358E-05 |
| Rhodanobacteriaceae_s p.                            | 0.00028331  | 0.00008959 | Acetivibrio_uncultured_bacterium              | 0 | 0 | Candidatus_Ovatusbacter_metagenome                     | 0.00015811  | 4.99991E-05 | ASV_19510                                                    | 0.000165488 | 5.23319E-05 | Alphaproteobacteria_uncultured_eubacterium                 | 0 | 0 | Clostridium_sensu_stricto_1_metagenome       | 0.00019838  | 6.27358E-05 |
| Rs-M47_ uncultured_bacterium                        | 0.00028331  | 0.00008959 | Acetonaerobium_uncultured_bacterium           | 0 | 0 | Methanosphaera_sp.                                     | 0.00015811  | 4.99991E-05 | Bdellovibrio_unidentified                                    | 0.000165488 | 5.23319E-05 | Alphaproteobacteria_uncultured_gut_metagenome              | 0 | 0 | Lentimicrobiaceae_wastewater_metagenome      | 0.00019838  | 6.27358E-05 |
| Solirubrobacteriales_67-14_ uncultured_soil         | 0.00028331  | 0.00004377 | Acetobacter_sp.                               | 0 | 0 | Opitutaceae_IMCC26134Verrucomicrobia_bacterium         | 0.00015811  | 4.99991E-05 | Beggiatoa_uncultured_bacterium                               | 0.000165488 | 5.23319E-05 | Alphaproteobacteria_uncultured_Lacobacterium_aquatile      | 0 | 0 | Candidatus_lainarchaeumuncultured_arc haeon  | 0.00019039  | 6.02066E-05 |
| Thauera_sp.                                         | 0.00028331  | 0.00004377 | Acetobacteraceae_sp.                          | 0 | 0 | ASV_14663                                              | 0.000157564 | 4.98261E-05 | Oligoflexus_sp.                                              | 0.000165488 | 5.23319E-05 | Alphaproteobacteria_uncultured_Novosphingobium             | 0 | 0 | Gracilibacteria_JGI_0000069-P22_metagenome   | 0.00019039  | 6.02066E-05 |
| ASV_1161                                            | 0.000276865 | 0.00008755 | Acetobacteraceae_ uncultured_bacterium        | 0 | 0 | ASV_4322                                               | 0.000157564 | 4.98261E-05 | Pirellulaceae_ uncultured_Plandctomycetaceae                 | 0.000165488 | 5.23319E-05 | Alphaproteobacteria_uncultured_Rhodospirillaceae_bacterium | 0 | 0 | Geothrix_sp.                                 | 0.000190382 | 6.02041E-05 |
| Gemmataceae_uncultured_sludge                       | 0.000276865 | 0.00008755 | Acetobacteraceae_ uncultured_metagenome       | 0 | 0 | Prevotella_nanceiensis                                 | 0.000157564 | 4.98261E-05 | Sedimentibacter_sp.                                          | 0.000165488 | 5.23319E-05 | Altererythrobracter_alpha_proteobacterium                  | 0 | 0 | Psychrobacillus_sp.                          | 0.000190382 | 6.02041E-05 |
| Saccharimonadales_T M7a_Candidatus_Saccharibacteria | 0.000276865 | 0.00008755 | Acetobacteraceae_ uncultured_sp.              | 0 | 0 | Allorhizobium-Neorhizobium-Pararhizobium-Rhizobium_sp. | 0.000157564 | 4.98261E-05 | Sericytochromatiumcultured_prokaryote                        | 0.000165488 | 5.23319E-05 | Altererythrobracter_sp.                                    | 0 | 0 | ASV_11399                                    | 0.000186257 | 5.88996E-05 |
| ASV_11393                                           | 0.000275306 | 0.00008706 | Acetothermia_ uncultured_bacterium            | 0 | 0 | Gemmataceae_ uncultured_bacterium                      | 0.000157564 | 4.98261E-05 | Luteitalea_sp.                                               | 0.000165488 | 5.23319E-05 | Alysiella_sp.                                              | 0 | 0 | Bacteroidales_genomosp.                      | 0.000185615 | 5.86966E-05 |
| Olsenella_ uncultured_bacterium                     | 0.000275306 | 0.00008706 | Acholeplasma_ uncultured_bacterium            | 0 | 0 | Kocuria_marina                                         | 0.000157564 | 4.98261E-05 | Nitrososphaeraeae_s p.                                       | 0.000165488 | 5.23319E-05 | Alysiella_ uncultured_bacterium                            | 0 | 0 | Diplorickeetsiaceae_ uncultured_bacterium    | 0.000185615 | 5.86966E-05 |
| Perfluoridibaca_sp.                                 | 0.000275306 | 0.00008706 | Acholeplasma_exanthum                         | 0 | 0 | Micavibrionaceae_ uncultured_Alphaproteobacteria       | 0.000157564 | 4.98261E-05 | ASV_15770                                                    | 0.000165488 | 5.23319E-05 | Amaricoccus_sp.                                            | 0 | 0 | Flavobacterium_sp.                           | 0.000185615 | 5.86966E-05 |
| Prevotellacultured_Bacteroidetes                    | 0.000275306 | 0.00008706 | Acholeplasma_brassicae                        | 0 | 0 | SaccharimonadalesT M7_phylum                           | 0.000157564 | 4.98261E-05 | ASV_15776                                                    | 0.000165488 | 5.23319E-05 | Amaricoccus_tamworthensis                                  | 0 | 0 | Gastranaerophilales_ uncultured_organism     | 0.000185615 | 5.86966E-05 |
| Methyloplasma_sp.                                   | 0.000270173 | 0.00008542 | Acholeplasma_laidlawii                        | 0 | 0 | Saccharimonadia_sp_67-                                 | 0.000157564 | 4.98261E-05 | Caulobacteraceae_ uncultured_metagenome                      | 0.000165488 | 5.23319E-05 | Amb-16S-1323_ uncultured_bacterium                         | 0 | 0 | Haloplasma_ uncultured_bacterium             | 0.000185615 | 5.86966E-05 |
| Dialister_Veillonellaceae_bacterium                 | 0.000268677 | 0.00008496 | Acholeplasma_morum                            | 0 | 0 | Solirubrobacteriales_67-14_ uncultured_Coneixibacter   | 0.000157564 | 4.98261E-05 | Gaiella_ uncultured_Coneixibacteraceae                       | 0.000165488 | 5.23319E-05 | Aminobacter_sp.                                            | 0 | 0 | Paracaedibacteraceae_ uncultured_sp.         | 0.000185615 | 5.86966E-05 |
| Taibaella_metagenome                                | 0.000268677 | 0.00008496 | Acholeplasma_sp.                              | 0 | 0 | Tepidimonas_sp.                                        | 0.000157564 | 4.98261E-05 | RsaH231_ uncultured_bacterium                                | 0.000165488 | 5.23319E-05 | Ammonibacillus_agariferans                                 | 0 | 0 | ASV_4143                                     | 0.000184607 | 5.83779E-05 |
| Candidatus_Komeilbacteria_sp.                       | 0.00026572  | 0.00008403 | Acholeplasmauncultured_Acholeplasmataceae     | 0 | 0 | Woesearchaeales_m etagenome                            | 0.000157564 | 4.98261E-05 | Labrys_sp.                                                   | 0.000165488 | 5.23319E-05 | Ammoniphilus_oxalaticus                                    | 0 | 0 | Azovibrio_ uncultured_bacterium              | 0.000184607 | 5.83779E-05 |
| Chloroplast_Carteria_s p.                           | 0.00026572  | 0.00008403 | Achromatium_sp.                               | 0 | 0 | ASV_7664                                               | 0.000144456 | 4.5681E-05  | Malikia_ uncultured_bacterium                                | 0.000152215 | 4.81346E-05 | Amnibacterium_sp.                                          | 0 | 0 | ASV_1901                                     | 0.000182724 | 5.3974E-05  |
| Desulfovibrio_sp.                                   | 0.00026572  | 0.00008403 | Acidaminobacter_ uncultured_bacterium         | 0 | 0 | Prevotella_paludivivens                                | 0.000144456 | 4.5681E-05  | ASV_2433                                                     | 0.000149674 | 4.73311E-05 | Amycolatopsis_sp.                                          | 0 | 0 | ASV_13728                                    | 0.00018166  | 5.48485E-05 |
| Marinimicrobia_(SAR406_clade)_metagenome            | 0.00026572  | 0.00008403 | Acidaminococcaceae_ uncultured_bacterium      | 0 | 0 | Acetobacteraceae_ uncultured_metagenome                | 0.000140543 | 4.44436E-05 | Bejerinckiaaceae_1174-901-12_ uncultured_Alphaproteobacteria | 0.000149674 | 4.73311E-05 | Anaerobacterium_ uncultured_bacterium                      | 0 | 0 | Berkelbacteria_Candidatus_Berkelbacteria     | 0.00017359  | 5.4894E-05  |
| ASV_1837                                            | 0.00026528  | 0.00006350 | Acidibacter_metagenome                        | 0 | 0 | ASV_14729                                              | 0.000140543 | 4.44436E-05 | Holosporaceae_ uncultured_sp.                                | 0.000149674 | 4.73311E-05 | Anaerobiosprillum_suciniciproducens                        | 0 | 0 | Dyadobacter_fermentans                       | 0.00017359  | 5.4894E-05  |
| Arthrobacter_sp.                                    | 0.00025580  | 0.00008089 | Acidibacter_ uncultured_bacterium             | 0 | 0 | Bauldia_metagenome                                     | 0.000140543 | 4.44436E-05 | Synergistaceae_ uncultured_bacterium_enrichment              | 0.000149674 | 4.73311E-05 | Anaerococcus_hydrogenalis                                  | 0 | 0 | Lachnospiraceae_NK3A20_groupuncultured_rumen | 0.00017359  | 5.4894E-05  |
| Candidatus_Lloydbacteria_sp.                        | 0.00025580  | 0.00008089 | Acidibacter_sp.                               | 0 | 0 | Lentimicrobiaceae_s p.                                 | 0.000140543 | 4.44436E-05 | Vicinamibacteria_ uncultured_Acidobacteria                   | 0.000149674 | 4.73311E-05 | Anaerococcus_octavus                                       | 0 | 0 | Spirochaetaceae_ uncultured_Treponema        | 0.00017359  | 5.4894E-05  |
| Candidatus_Rhabdochlamydia                          | 0.00025580  | 0.00008089 | Acidimicrobia_IMCC26256_metagenome            | 0 | 0 | Pseudomonas_caeni                                      | 0.000140543 | 4.44436E-05 | ASV_3580                                                     | 0.000149674 | 4.73311E-05 | Anaerococcus_prevotii                                      | 0 | 0 | Subgroup_10_sp.                              | 0.00017359  | 5.4894E-05  |
| Chlamydiales_cvE6_ uncultured_bacterium             | 0.00025580  | 0.00008089 | Acidimicrobia_IMCC26256_sp.                   | 0 | 0 | Woesearchaeales_SCGC_AAA011-D5_sp.                     | 0.000140543 | 4.44436E-05 | Bdellovibrio_metagenome                                      | 0.000149674 | 4.73311E-05 | Anaerococcus_sp.                                           | 0 | 0 | Thioclava_ uncultured_bacterium              | 0.00017359  | 5.4894E-05  |
| Christensenellaceae_R7_groupuncultured_prokaryote   | 0.00025580  | 0.00008089 | Acidimicrobia_IMCC26256_ uncultured_bacterium | 0 | 0 | ASV_15672                                              | 0.000140543 | 4.44436E-05 | Chloroplast_metagenome                                       | 0.000149674 | 4.73311E-05 | Anaerococcus_ uncultured_bacterium                         | 0 | 0 | Armatimonadota_ uncultured_sp.               | 0.00017359  | 5.4894E-05  |
| Fimbrilglobusuncultured_Gemmata                     | 0.00025580  | 0.00008089 | Acidimicrobia_IMCC26256_ uncultured_soil      | 0 | 0 | Calothrix_KVSF5_ uncultured_bacterium                  | 0.000140543 | 4.44436E-05 | Parubacteria_UBA9983_sp.                                     | 0.000149674 | 4.73311E-05 | Anaerococcusuncultured_organism                            | 0 | 0 | Chlamydiales_cvE6_metagenome                 | 0.00017359  | 5.4894E-05  |

|                                             |           |           |                                                   |   |   |                                                          |                |             |                                                                |              |             |                                                           |   |   |                                                              |              |             |
|---------------------------------------------|-----------|-----------|---------------------------------------------------|---|---|----------------------------------------------------------|----------------|-------------|----------------------------------------------------------------|--------------|-------------|-----------------------------------------------------------|---|---|--------------------------------------------------------------|--------------|-------------|
| Flavobacterium_unidentif                    | 0.0025580 | 0.0008089 | Acidimicrobia_IMCC26256uncultured_Acidifermonas   | 0 | 0 | Candidatus_Microthrix_sp.                                | 0.0010137869   | 4.9598E-05  | Ruminococcaceae_uncultured_Ruminococcaceae                     | 0.001014375  | 4.54577E-05 | Anaerocolumna_uncultured_bacterium                        | 0 | 0 | Oligoflexia_0319-6G20_uncultured_protobacterium              | 0.001015221  | 5.22475E-05 |
| Lachnospiraceae_UCG010_uncultured_bacterium | 0.0025580 | 0.0008089 | Acidimicrobia_IMCC26256uncultured_actinobacterium | 0 | 0 | Candidatus_Planktophila_sp.                              | 0.0010137869   | 4.3598E-05  | ASV_2285                                                       | 0.0010131331 | 4.15305E-05 | Anaerofilumuncultured_Anaerofilum                         | 0 | 0 | Pelosinus_sp.                                                | 0.001015221  | 5.22475E-05 |
| LD29_uncultured_bacterium                   | 0.0025580 | 0.0008089 | Acidimicrobia_IMCC26256uncultured_Actinomycetales | 0 | 0 | Gemmatataceae_uncultured_Plantomycetia                   | 0.0010137869   | 4.9598E-05  | Anaerovoracaceae_Family_XIII_AD3011_group_uncultured_bacterium | 0.001012121  | 4.01122E-05 | Anaerofustis_uncultured_bacterium                         | 0 | 0 | Intestinimonas_Clostridium_sp.                               | 0.0010161482 | 5.10651E-05 |
| Microtrichaceae_uncultured_sp.              | 0.0025580 | 0.0008089 | Acidimicrobia_sp.                                 | 0 | 0 | ASV_21599                                                | 0.0010136017   | 4.30124E-05 | ASV_18878                                                      | 0.001012121  | 4.01122E-05 | Anaeroglobus_geminatus                                    | 0 | 0 | Lentimicrobiaceae_uncultured_Sphingobacteriales              | 0.0010161482 | 5.10651E-05 |
| Rickettsiaceae_sp.                          | 0.0025580 | 0.0008089 | Acidimicrobia_uncultured_bacterium                | 0 | 0 | Candidatus_Udaebacter_sp.                                | 0.0010136017   | 4.30124E-05 | Methanobacterium_sp.                                           | 0.001012121  | 4.01122E-05 | Anaerolineaceae_bacterium                                 | 0 | 0 | Saccharibacillus_sp.                                         | 0.0010161482 | 5.10651E-05 |
| Sphingobacteriales_env.OPS_17_metagenome    | 0.0025580 | 0.0008089 | Acidimicrobia_uncultured_metagenome               | 0 | 0 | Corynebacterium_aurimucosum                              | 0.0010136017   | 4.30124E-05 | Rurimicrobium_uncultured_bacterium                             | 0.001012121  | 4.01122E-05 | Anaerolineaceae_sp.                                       | 0 | 0 | ASV_14140                                                    | 0.001015774  | 4.92601E-05 |
| Verrucomicrobiaceae_uncultured_sp.          | 0.0025580 | 0.0008089 | Acidimicrobia_uncultured_sp.                      | 0 | 0 | Lachnospira_sp.                                          | 0.0010136017   | 4.30124E-05 | Cellulosimicrobium_sp.                                         | 0.001012121  | 3.94519E-05 | Anaerolineaceae_UCG001_uncultured_bacterium               | 0 | 0 | Actinobacteria_PeM15uncultured_actinobacterium               | 0.001015521  | 4.9083E-05  |
| Armatimonadota_uncultured_bacterium         | 0.0025236 | 0.0007980 | Acidimicrobia_uncultured_Acidimicrobia            | 0 | 0 | Telmatocola_metagenome                                   | 0.0010136017   | 4.30124E-05 | Latescibacterota_sp.                                           | 0.001012121  | 3.94519E-05 | Anaerolineaceae_uncultured_bacterium                      | 0 | 0 | Azospira_uncultured_Rhodocyclusaceae                         | 0.0010152306 | 5.34601E-05 |
| Formivivrio_sp.                             | 0.0025236 | 0.0007980 | Acidimicrobia_uncultured_actinobacterium          | 0 | 0 | Woeseearchaeales_SCGC_AAA011-D5_uncultured_euryarchaeote | 0.0010136017   | 4.30124E-05 | Legionella_pneumophila                                         | 0.001012121  | 3.94519E-05 | Anaerolineaceae_uncultured_metagenome                     | 0 | 0 | Cavicella_sp.                                                | 0.0010152306 | 5.34601E-05 |
| NannocystaceaeEnhygromyxa_sp.               | 0.0025236 | 0.0007980 | Acidimicrobia_uncultured_Actinomycetales          | 0 | 0 | ASV_5084                                                 | 0.001013441462 | 2.8641E-05  | Burkholderiales_B1-7BS_uncultured_bacterium                    | 0.001012121  | 3.94428E-05 | Anaerolineaceae_uncultured_sp.                            | 0 | 0 | Fokiniaceae_uncultured_bacterium                             | 0.0010152306 | 5.34601E-05 |
| Aurantimicrobium_sp.                        | 0.0024866 | 0.0007863 | Acidimicrobia_uncultured_bacterium_YC-ZSS-LKJ199  | 0 | 0 | ASV_12525                                                | 0.001012936963 | 4.0993E-05  | Hungateiclostridiaceae_uncultured_bacterium                    | 0.001012121  | 3.94428E-05 | Anaerolineaceae_uncultured_uncultured_soil                | 0 | 0 | Ilumatobacter_sp.                                            | 0.0010152306 | 5.34601E-05 |
| Eubacterium_coprostanoligenes_group_sp.     | 0.0024866 | 0.0007863 | Acidiphilium_uncultured_bacterium                 | 0 | 0 | ASV_15737                                                | 0.0010122975   | 3.8881E-05  | Acidobacteria_bacterium                                        | 0.001012121  | 3.92489E-05 | Anaerolineaceae_uncultured_Bellilinea                     | 0 | 0 | Rhodocyclusaceae_uncultured_metagenome                       | 0.0010152306 | 5.34601E-05 |
| Ferruginibacter_uncultured_bacterium        | 0.0024866 | 0.0007863 | Acidiphilium_sp.                                  | 0 | 0 | bacterium_UW                                             | 0.0010122975   | 3.8881E-05  | Acidobacteriales_sp.                                           | 0.001012121  | 3.92489E-05 | Anaerolineaceae_uncultured_delta                          | 0 | 0 | Treponema_denticola                                          | 0.0010151042 | 4.77637E-05 |
| Ga0077536_sp.                               | 0.0024866 | 0.0007863 | Acidisoma_sp.                                     | 0 | 0 | Candidatus_Hepaticola_uncultured_bacterium               | 0.0010122975   | 3.8881E-05  | ASV_20677                                                      | 0.001012121  | 3.92489E-05 | Anaerolineaceae_uncultured_eubacterium                    | 0 | 0 | Micavibrionaceae_uncultured_sp.                              | 0.0010151042 | 4.77637E-05 |
| Nocardioideis_sp.                           | 0.0024866 | 0.0007863 | Acidithiobacillaceae_KCM-B-112_sp.                | 0 | 0 | Neisseriaceae_uncultured_sp.                             | 0.0010122975   | 3.8881E-05  | ASV_4527                                                       | 0.001012121  | 3.92489E-05 | Anaerolineaceae_uncultured_Longilinea                     | 0 | 0 | Parasutterella_sp.                                           | 0.0010151042 | 4.77637E-05 |
| Psychrobacter_pulmonis                      | 0.0024866 | 0.0007863 | Acidithiobacillus_ferrooxidans                    | 0 | 0 | ASV_21002                                                | 0.0010121134   | 3.83059E-05 | Methylomonadaceae_pLW-20_uncultured_soil                       | 0.001012121  | 3.92489E-05 | Anaerolineaceae_uncultured_sludge                         | 0 | 0 | Roseomonas_aquatitica                                        | 0.0010151042 | 4.77637E-05 |
| Kineosporia_sp.                             | 0.0024557 | 0.0007766 | Acidobacteria_bacterium                           | 0 | 0 | ASV_2433                                                 | 0.0010121134   | 3.83059E-05 | Microtrichaceae_IMCC26207_sp.                                  | 0.001012121  | 3.92489E-05 | Anaerolineaceae_uncultured_toluene_degrading_methanogenic | 0 | 0 | Candidatus_Limnoluna_uncultured_bacterium                    | 0.0010151042 | 4.77637E-05 |
| Pusillimonasuncultured_Pusillimonas         | 0.0024557 | 0.0007766 | Acidobacteriaceae_(Subgroup_1)_sp.                | 0 | 0 | Nitzschia_sp.                                            | 0.0010121134   | 3.83059E-05 | Pedospheraeaceae_sp.                                           | 0.001012121  | 3.92489E-05 | Anaerolineae_1-20_sp.                                     | 0 | 0 | Spirochaetaceae_M2PT2-76_thermite_group_uncultured_bacterium | 0.0010151297 | 4.4682E-05  |
| Shuttleworthia_uncultured_bacterium         | 0.0024557 | 0.0007766 | Acidobacteriae_Elev-16S-1166_sp.                  | 0 | 0 | Nostocoida_limicola                                      | 0.0010121134   | 3.83059E-05 | Peredibacter_uncultured_bacterium                              | 0.001012121  | 3.92489E-05 | Anaerolineae_1-20uncultured_Chloroflexia                  | 0 | 0 | Tepidisphaeraceae_uncultured_bacterium                       | 0.0010151297 | 4.4682E-05  |
| Acidobacteriaceae_(Subgroup_1)_sp.          | 0.0024180 | 0.0007646 | Acidobacteriae_Elev-16S-1166_uncultured_bacterium | 0 | 0 | Reyranella_sp.                                           | 0.0010121134   | 3.83059E-05 | Polyangia_mie1-27_uncultured_bacterium                         | 0.001012121  | 3.92489E-05 | Anaerolineae_A4b_metagenome                               | 0 | 0 | ASV_15102                                                    | 0.0010138466 | 4.3786E-05  |
| Pseudarcobacter_uncultured_Arobacter        | 0.0024180 | 0.0007646 | Acidobacteriales_sp.                              | 0 | 0 | Afipia_sp.                                               | 0.0010118173   | 3.73696E-05 | Ruminococcaceae_uncultured_bacterium                           | 0.001012121  | 3.92489E-05 | Anaerolineae_A4b_uncultured_bacterium                     | 0 | 0 | Cephalotococcusuncultured_Verrucomicrobia                    | 0.0010138466 | 4.3786E-05  |
| Tsakumarella_paurometabola                  | 0.0024180 | 0.0007646 | Acidocella_uncultured_bacterium                   | 0 | 0 | ASV_4527                                                 | 0.0010118173   | 3.73696E-05 | Saccharimonadales_WWH38_sp.                                    | 0.001012121  | 3.92489E-05 | Anaerolineae_A4b_uncultured_soil                          | 0 | 0 | Edaphobaculum_uncultured_Bacteroidetes                       | 0.0010138466 | 4.3786E-05  |
| Brevundimonas_aveniformis                   | 0.0022942 | 0.0007255 | Acidothermus_uncultured_bacterium                 | 0 | 0 | Hydrogenophilaceae_sp.                                   | 0.0010118173   | 3.73696E-05 | Thermus_sp.                                                    | 0.001012121  | 3.92489E-05 | Anaerolineae_A4b_sp.                                      | 0 | 0 | Desulfobacterota_sp.                                         | 0.0010138466 | 4.3786E-05  |
| Chloroplast_Guillardia_theta                | 0.0022942 | 0.0007255 | Acidovorax_sp.                                    | 0 | 0 | MidBa8_uncultured_bacterium                              | 0.0010118173   | 3.73696E-05 | Actinobacteria_uncultured_sp.                                  | 0.001012121  | 3.46089E-05 | Anaerolineae_A4b_wastewater_metagenome                    | 0 | 0 | TelmatocolaTelmatocola_sphagniphila                          | 0.0010138466 | 4.3786E-05  |
| Blri41_uncultured_bacterium                 | 0.0022102 | 0.0006982 | Acinetobacter_metagenome                          | 0 | 0 | Capnocytophaga_haemolytica                               | 0.0010117848   | 3.72668E-05 | Anaerococcusuncultured_organism                                | 0.001012121  | 3.46089E-05 | Anaerolineae_sp.                                          | 0 | 0 | ASV_3442                                                     | 0.0010138466 | 4.3786E-05  |
| Flavobacterium_kingseongi                   | 0.0022102 | 0.0006982 | Acinetobacter_baumannii                           | 0 | 0 | Paludisphaeraalsospira_aera_sp.                          | 0.0010117848   | 3.72668E-05 | ASV_2249                                                       | 0.001012121  | 3.46089E-05 | Anaerolineae_uncultured_bacterium                         | 0 | 0 | Flavobacterium_tegetincola                                   | 0.0010138466 | 4.3786E-05  |
| Sulfurimonas_sp.                            | 0.0022102 | 0.0006982 | Acinetobacter_kyonggiensis                        | 0 | 0 | Candidatus_Endoechinascidia_uncultured_gamma             | 0.0010105407   | 3.33705E-05 | ASV_3026                                                       | 0.001012121  | 3.46089E-05 | Anaeromusa-Anaerococcus_sp.                               | 0 | 0 | Gaiellales_sp.                                               | 0.001012121  | 3.92666E-05 |
| Anaerocolumna_uncultured_bacterium          | 0.0020764 | 0.0006566 | Acinetobacter_sp.                                 | 0 | 0 | Paludibacteraceae_uncultured_marine_metagenome           | 0.0010105407   | 3.33705E-05 | Chlamydiales_sp.                                               | 0.001012121  | 3.46089E-05 | Anaeromyxobacter_dehalogenans                             | 0 | 0 | ASV_18208                                                    | 0.001012121  | 3.92399E-05 |
| Berkelbacteria_metagenome                   | 0.0020764 | 0.0006566 | Acinetobacter_townieri                            | 0 | 0 | Caulobacter_metagenome                                   | 0.0010105407   | 3.11775E-05 | Clostridia_UCG-014_gut_metagenome                              | 0.001012121  | 3.46089E-05 | Anaeromyxobacter_uncultured_bacterium                     | 0 | 0 | ASV_10385                                                    | 0.001012121  | 3.83135E-05 |
| Lactobacillus_iners                         | 0.0020764 | 0.0006566 | Acremonium_fucis                                  | 0 | 0 | Conexibacter_sp.                                         | 0.0010105407   | 3.11775E-05 | Kocuria_marina                                                 | 0.001012121  | 3.46089E-05 | Anaerorhabdus_furcosus_group_uncultured_bacterium         | 0 | 0 | Candidatus_Ovatubacter_uncultured_proteobacterium            | 0.001012121  | 3.83135E-05 |
| Leptotrichia_wadei                          | 0.002002  | 0.0008089 | Actinobacillus_sp.                                | 0 | 0 | Eubacterium_siraenum_group_sp.                           | 0.0010105407   | 3.11775E-05 | Myxococcaceae_sp.                                              | 0.001012121  | 3.46089E-05 | Anaerosinus_uncultured_bacterium                          | 0 | 0 | Gammaaproteobacteria_CHAB-XI-                                | 0.001012121  | 3.83135E-05 |



|                                                                      | 076<br>4                      | 656<br>6               |                                                                   |   |   | E-<br>05                                                       | E-<br>05                |                         | 944<br>3                                                | E-<br>05                  |                           |                                                                                  |   | 27_uncultured_bacte-<br>rium | 115<br>8                                                          | E-<br>05                       |                         |
|----------------------------------------------------------------------|-------------------------------|------------------------|-------------------------------------------------------------------|---|---|----------------------------------------------------------------|-------------------------|-------------------------|---------------------------------------------------------|---------------------------|---------------------------|----------------------------------------------------------------------------------|---|------------------------------|-------------------------------------------------------------------|--------------------------------|-------------------------|
| ASV_13765                                                            | 0.0<br>002<br>064<br>7        | 0.0<br>000<br>652<br>9 | Actinobacteria_0319-<br>7L14_uncultured_actin-<br>obacterium      | 0 | 0 | Neisseriaceae_uncul-<br>tured_marine                           | 9.84<br>775<br>E-<br>05 | 3.11<br>413<br>E-<br>05 | SandarakinorhabdusSa-<br>ndarakinorhabdus_sp.           | 0.00<br>010<br>944<br>3   | 3.46<br>089<br>E-<br>05   | Anaerostipes_sp.                                                                 | 0 | 0                            | Mycoplasmataceae_<br>genomos.                                     | 0.00<br>012<br>135<br>E-<br>05 | 3.83<br>135<br>E-<br>05 |
| SalinispirillumSalinispiril-<br>lum_sp.                              | 0.0<br>002<br>000<br>0        | 0.0<br>000<br>000<br>0 | Actinobacteria_PeM15<br>_bacterium_rj7                            | 0 | 0 | Prevotella_marshii                                             | 9.42<br>785<br>E-<br>05 | 2.98<br>135<br>E-<br>05 | Berkelbacterium_uncultu-<br>red_bacterium               | 0.00<br>010<br>147<br>6   | 3.20<br>895<br>E-<br>05   | Anaeroligium_lactatifer<br>mentans                                               | 0 | 0                            | Patescibacteria_WW<br>E3uncultured_Alpha<br>proteobacteria        | 0.00<br>012<br>135<br>E-<br>05 | 3.83<br>135<br>E-<br>05 |
| Candidatus_Nomuraba-<br>cteria_uncultured_bact-<br>erium             | 0.0<br>002<br>000<br>057<br>2 | 0.0<br>000<br>650<br>5 | Actinobacteria_PeM15<br>_metagenome                               | 0 | 0 | Aerococcus_sp.                                                 | 8.78<br>395<br>E-<br>05 | 2.77<br>773<br>E-<br>05 | Candidatus_Adlerbacte-<br>ria_metagenome                | 0.00<br>010<br>147<br>6   | 3.20<br>895<br>E-<br>05   | Anaerovibrio_sp.                                                                 | 0 | 0                            | Treponema_metage-<br>nome                                         | 0.00<br>012<br>135<br>E-<br>05 | 3.83<br>135<br>E-<br>05 |
| Methanobrevibacter_sp                                                | 0.0<br>002<br>000<br>057<br>2 | 0.0<br>000<br>650<br>5 | Actinobacteria_PeM15<br>_sp.                                      | 0 | 0 | Ahniella_affigens                                              | 8.78<br>395<br>E-<br>05 | 2.77<br>773<br>E-<br>05 | Moraxellaceae_uncultu-<br>red_sp.                       | 0.00<br>010<br>147<br>6   | 3.20<br>895<br>E-<br>05   | Anaerovoracaceae_Fa-<br>mily_XIII_AD3011_grou-<br>p_sp.                          | 0 | 0                            | ASV_16882                                                         | 0.00<br>012<br>111<br>2        | 3.82<br>99E-<br>05      |
| ASV_14678                                                            | 0.0<br>001<br>964<br>6        | 0.0<br>000<br>621<br>3 | Actinobacteria_PeM15<br>_uncultured_soil                          | 0 | 0 | ASV_9492                                                       | 8.78<br>395<br>E-<br>05 | 2.77<br>773<br>E-<br>05 | Phaeodactylbacter_un-<br>cultured_bacterium             | 0.00<br>010<br>147<br>6   | 3.20<br>895<br>E-<br>05   | Anaerovoracaceae_Fa-<br>mily_XIII_AD3011_grou-<br>p_uncultured_bacteriu-<br>m    | 0 | 0                            | Candidatus_Aquilun-<br>a_sp.                                      | 0.00<br>012<br>111<br>2        | 3.82<br>99E-<br>05      |
| Hydrogenophaga_sp.                                                   | 0.0<br>001<br>964<br>6        | 0.0<br>000<br>621<br>3 | Actinobacteria_PeM15<br>uncultured_actinobact-<br>erium           | 0 | 0 | Babeliaceae_uncultu-<br>red_bacterium                          | 8.78<br>395<br>E-<br>05 | 2.77<br>773<br>E-<br>05 | Sphingobium_sp.                                         | 0.00<br>010<br>147<br>6   | 3.20<br>895<br>E-<br>05   | Anaerovoracaceae_Fa-<br>mily_XIII_AD3011_grou-<br>p_uncultured_rumen             | 0 | 0                            | Rickettsiales_AB1_s-<br>p.                                        | 0.00<br>012<br>111<br>2        | 3.82<br>99E-<br>05      |
| Marinilibiaceae_uncul-<br>tured_bacterium                            | 0.0<br>001<br>964<br>6        | 0.0<br>000<br>621<br>3 | Actinobacteria_sp.                                                | 0 | 0 | Nitrosomonadaceae_<br>uncultured_bacteri-<br>um                | 8.24<br>937<br>E-<br>05 | 2.60<br>868<br>E-<br>05 | Bradymonadales_uncul-<br>tured_rumen                    | 0.00<br>009<br>978<br>3   | 3.15<br>542<br>E-<br>05   | Anaerovoracaceae_Fa-<br>mily_XIII_AD3011_grou-<br>puncultured_Clostridia-<br>les | 0 | 0                            | Spirosoma_agri                                                    | 0.00<br>012<br>111<br>2        | 3.82<br>99E-<br>05      |
| Candidatus_Zambryski<br>bacteria_Parcubacteria_<br>_group            | 0.0<br>001<br>902<br>8        | 0.0<br>000<br>601<br>7 | Actinobacteria_uncultu-<br>red_bacterium                          | 0 | 0 | Peptococcus_sp.                                                | 8.24<br>937<br>E-<br>05 | 2.60<br>868<br>E-<br>05 | Coxiella_sp.                                            | 0.00<br>009<br>978<br>3   | 3.15<br>542<br>E-<br>05   | Anaerovoracaceae_Fa-<br>mily_XIII_UCG-<br>007Peptostreptococac-<br>eae_bacterium | 0 | 0                            | ASV_3443                                                          | 0.00<br>012<br>096             | 2.63<br>308<br>E-<br>05 |
| Candidatus_Peregrinib-<br>acteria_uncultured_bact-<br>erium          | 0.0<br>001<br>888<br>8        | 0.0<br>000<br>597<br>3 | Actinobacteria_uncultu-<br>red_metagenome                         | 0 | 0 | Candidatus_Peribact-<br>eria_metagenome                        | 8.07<br>559<br>E-<br>05 | 2.55<br>373<br>E-<br>05 | RCP2-<br>54hydrothermal_vent                            | 0.00<br>009<br>978<br>3   | 3.15<br>542<br>E-<br>05   | Anaerovoracaceae_sp.                                                             | 0 | 0                            | Amnibacterium_sp.                                                 | 0.00<br>011<br>747<br>7        | 3.71<br>495<br>E-<br>05 |
| Leeia_uncultured_bact-<br>erium                                      | 0.0<br>001<br>888<br>8        | 0.0<br>000<br>597<br>3 | Actinobacteria_uncultu-<br>red_sp.                                | 0 | 0 | Kiritimatellae_WCH<br>B1-<br>4uncultured_verruc-<br>omicrobium | 8.07<br>559<br>E-<br>05 | 2.55<br>373<br>E-<br>05 | Rickettsiaceae_uncultu-<br>red_Alphaproteobacteri-<br>a | 0.00<br>009<br>978<br>3   | 3.15<br>542<br>E-<br>05   | Anaerovoracaceae_unc-<br>ultured_bacterium                                       | 0 | 0                            | ASV_16398                                                         | 0.00<br>011<br>747<br>7        | 3.71<br>495<br>E-<br>05 |
| Pajaroellobacter_metag-<br>enome                                     | 0.0<br>001<br>888<br>8        | 0.0<br>000<br>597<br>3 | Actinobacteria_uncultu-<br>red_Actinomycetales_<br>bacterium      | 0 | 0 | Alistipes_uncultured_<br>bacterium                             | 0.00<br>007<br>878<br>2 | 2.49<br>131<br>E-<br>05 | ASV_4322                                                | 9.40<br>291<br>E-<br>05   | 2.97<br>346<br>E-<br>05   | Anaerovorax_sp.                                                                  | 0 | 0                            | ASV_3630                                                          | 0.00<br>011<br>747<br>7        | 3.71<br>495<br>E-<br>05 |
| Plasticumulans_lactati-<br>vorans                                    | 0.0<br>001<br>880<br>7        | 0.0<br>000<br>594<br>7 | Actinobacteriota_MB-<br>A2-108_sp.                                | 0 | 0 | ASV_19357                                                      | 0.00<br>007<br>878<br>2 | 2.49<br>131<br>E-<br>05 | Bdellovibrio_uncultured_<br>_deep-sea                   | 9.35<br>687<br>89E-<br>05 | 2.95<br>687<br>89E-<br>05 | Anaerovorax_uncultu-<br>red_bacterium                                            | 0 | 0                            | Blastocatella_11-<br>24_sp.                                       | 0.00<br>011<br>747<br>7        | 3.71<br>495<br>E-<br>05 |
| Absconditobacteriales<br>(SR1)_uncultured_Epsil-<br>onproteobacteria | 0.0<br>001<br>865<br>8        | 0.0<br>000<br>589<br>8 | Actinobacteriota_MB-<br>A2-<br>108_uncultured_bact-<br>erium      | 0 | 0 | Negativicutes_sp.                                              | 0.00<br>007<br>878<br>2 | 2.49<br>131<br>E-<br>05 | Candidatus_Omnitroph-<br>us_uncultured_bacteriu-<br>m   | 9.35<br>687<br>89E-<br>05 | 2.95<br>687<br>89E-<br>05 | Anaerovoraxuncultured_<br>_prokaryote                                            | 0 | 0                            | Flavobacteriaceae_b-<br>acterium                                  | 0.00<br>011<br>747<br>7        | 3.71<br>495<br>E-<br>05 |
| ASV_3568                                                             | 0.0<br>001<br>865<br>8        | 0.0<br>000<br>589<br>8 | Actinobacteriota_MB-<br>A2-<br>108uncultured_actinob-<br>acterium | 0 | 0 | Rathayibacter_sp.                                              | 0.00<br>007<br>878<br>2 | 2.49<br>131<br>E-<br>05 | Chryseobacterium_sp.                                    | 9.35<br>687<br>89E-<br>05 | 2.95<br>687<br>89E-<br>05 | Ancalomicrobium_sp.                                                              | 0 | 0                            | Pseudarcobacter_un-<br>cultured_Arcobacter                        | 0.00<br>011<br>747<br>7        | 3.71<br>495<br>E-<br>05 |
| ASV_3639                                                             | 0.0<br>001<br>865<br>8        | 0.0<br>000<br>589<br>8 | Actinomadura_sp.                                                  | 0 | 0 | Thaumarchaeota_ar-<br>chaeon                                   | 0.00<br>007<br>878<br>2 | 2.49<br>131<br>E-<br>05 | Eubacterium_brachy-                                     | 9.35<br>687<br>89E-<br>05 | 2.95<br>687<br>89E-<br>05 | Aneurinibacillus_uncul-<br>tured_bacterium                                       | 0 | 0                            | ASV_2061                                                          | 0.00<br>011<br>422<br>9        | 3.61<br>224<br>E-<br>05 |
| Rikenellaceae_sp.                                                    | 0.0<br>001<br>865<br>0        | 0.0<br>000<br>000<br>0 | Actinomycetes_uncultu-<br>red_bacterium                           | 0 | 0 | Woesearchaeales_A<br>R15uncultured_eury-<br>archaeote          | 0.00<br>007<br>878<br>2 | 2.49<br>131<br>E-<br>05 | Flexibacter_sp.                                         | 9.35<br>687<br>89E-<br>05 | 2.95<br>687<br>89E-<br>05 | Angustibacter_uncultu-<br>red_bacterium                                          | 0 | 0                            | ASV_21015                                                         | 0.00<br>011<br>422<br>9        | 3.61<br>224<br>E-<br>05 |
| Senegalimassilia_uncul-<br>tured_bacterium                           | 0.0<br>001<br>865<br>0        | 0.0<br>000<br>000<br>0 | Actinomycetes_dentalis                                            | 0 | 0 | Bly10_metagenome                                               | 7.07<br>089<br>E-<br>05 | 2.23<br>601<br>E-<br>05 | Afpia_sp.                                               | 8.75<br>542<br>E-<br>05   | 2.76<br>871<br>E-<br>05   | Anoxybacillus_sp.                                                                | 0 | 0                            | Leptotrichia_sp.                                                  | 0.00<br>011<br>422<br>9        | 3.61<br>224<br>E-<br>05 |
| ASV_14736                                                            | 0.0<br>001<br>835<br>3        | 0.0<br>000<br>580<br>4 | Actinomycetes_graeveni-<br>tzi                                    | 0 | 0 | Brevundimonas_sp.                                              | 7.02<br>716<br>E-<br>05 | 2.22<br>218<br>E-<br>05 | ASV_19457                                               | 8.75<br>542<br>E-<br>05   | 2.76<br>871<br>E-<br>05   | Antarctic_bacterium                                                              | 0 | 0                            | ASV_17401                                                         | 0.00<br>010<br>384<br>9        | 3.28<br>399<br>E-<br>05 |
| Blastocatella_uncultu-<br>red_bacterium                              | 0.0<br>001<br>835<br>3        | 0.0<br>000<br>580<br>4 | Actinomycetes_israelii                                            | 0 | 0 | Clostridia_UCG-<br>014_uncultured_rum-<br>en                   | 7.02<br>716<br>E-<br>05 | 2.22<br>218<br>E-<br>05 | ASV_2061                                                | 8.75<br>542<br>E-<br>05   | 2.76<br>871<br>E-<br>05   | Antriccoccus_suffuscus                                                           | 0 | 0                            | Gammaproteobacteri-<br>a_CHAB-XI-<br>28_uncultured_bacte-<br>rium | 0.00<br>010<br>384<br>9        | 3.28<br>399<br>E-<br>05 |
| Paenibacillus_barengot-<br>zii                                       | 0.0<br>001<br>835<br>3        | 0.0<br>000<br>580<br>4 | Actinomycetes_sp.                                                 | 0 | 0 | Leptolinea_uncultu-<br>red_bacterium                           | 7.02<br>716<br>E-<br>05 | 2.22<br>218<br>E-<br>05 | Eubacteriaceae_uncult-<br>ured_bacterium                | 8.75<br>542<br>E-<br>05   | 2.76<br>871<br>E-<br>05   | Apibacter_sp.                                                                    | 0 | 0                            | Parvibaculum_sp.                                                  | 0.00<br>010<br>384<br>9        | 3.28<br>399<br>E-<br>05 |
| Chlamydiales_cvE6_sp                                                 | 0.0<br>001<br>771<br>5        | 0.0<br>000<br>560<br>2 | Actinomycetes_unidentifi-<br>ed                                   | 0 | 0 | Rickettsiella_sp.                                              | 7.02<br>716<br>E-<br>05 | 2.22<br>218<br>E-<br>05 | Longimicrobiaceae_un-<br>cultured_bacterium             | 8.75<br>542<br>E-<br>05   | 2.76<br>871<br>E-<br>05   | Aquabacterium_sp.                                                                | 0 | 0                            | Rubinsphaeraceae_<br>SH-<br>PL14uncultured_Pla-<br>nctomycetaceae | 0.00<br>010<br>384<br>9        | 3.28<br>399<br>E-<br>05 |
| Simkaniaceae_uncultu-<br>red_Chlamydiales                            | 0.0<br>001<br>771<br>5        | 0.0<br>000<br>000<br>0 | Actinomycetaceae_F0<br>332_uncultured_bact-<br>erium              | 0 | 0 | Solobacterium_uncul-<br>tured_rumen                            | 7.02<br>716<br>E-<br>05 | 2.22<br>218<br>E-<br>05 | Verrucomicrobiaceae_<br>uncultured_metageno-<br>me      | 8.75<br>542<br>E-<br>05   | 2.76<br>871<br>E-<br>05   | Aquaspirillum_putridico-<br>nchyium                                              | 0 | 0                            | ASV_5779                                                          | 0.00<br>010<br>165<br>7        | 3.21<br>468<br>E-<br>05 |
| Calothrix_PCC-<br>6303_Calothrix_sp.                                 | 0.0<br>001<br>719<br>0        | 0.0<br>000<br>543<br>6 | Actinomycetaceae_F0<br>332unidentified                            | 0 | 0 | Chitinophagaceae_u-<br>ncultured_bacteriu-<br>m                | 6.80<br>087<br>E-<br>05 | 2.15<br>062<br>E-<br>05 | ASV_2303                                                | 8.27<br>438<br>E-<br>05   | 2.61<br>659<br>E-<br>05   | Aquaspirillum_sp.                                                                | 0 | 0                            | ASV_4909                                                          | 0.00<br>010<br>092<br>7        | 3.19<br>159<br>E-<br>05 |
| Candidatus_Pacebacte-<br>ria_uncultured_bacteriu-<br>m               | 0.0<br>001<br>719<br>0        | 0.0<br>000<br>543<br>6 | Actinomycetaceae_un-<br>cultured_bacterium                        | 0 | 0 | ASV_20561                                                      | 5.90<br>865<br>E-<br>05 | 1.86<br>848<br>E-<br>05 | Hylemonella_sp.                                         | 8.27<br>438<br>E-<br>05   | 2.61<br>659<br>E-<br>05   | Aquicella_metagenome                                                             | 0 | 0                            | CR-115_sp.                                                        | 0.00<br>010<br>069<br>5        | 3.18<br>426<br>E-<br>05 |
| Corynebacterium_maris                                                | 0.0<br>001<br>719<br>0        | 0.0<br>000<br>543<br>6 | Actinomycetaceae_un-<br>cultured_metagenom-<br>e                  | 0 | 0 | ASV_2080                                                       | 5.90<br>865<br>E-<br>05 | 1.86<br>848<br>E-<br>05 | Mitochondria_Eukaryot-<br>a_sp.                         | 8.27<br>438<br>E-<br>05   | 2.61<br>659<br>E-<br>05   | Aquicella_sp.                                                                    | 0 | 0                            | Lysinibacillus_sp.                                                | 0.00<br>010<br>069<br>5        | 3.18<br>426<br>E-<br>05 |
| Oligoflexia_0319-<br>6G20_uncultured_micr-<br>oorganism              | 0.0<br>001<br>719<br>0        | 0.0<br>000<br>543<br>6 | Actinomycetaceae_un-<br>cultured_rumen                            | 0 | 0 | Nannocystis_metage-<br>nome                                    | 5.90<br>865<br>E-<br>05 | 1.86<br>848<br>E-<br>05 | Sandaraciaceae_unc-<br>ultured_delta                    | 8.27<br>438<br>E-<br>05   | 2.61<br>659<br>E-<br>05   | Aquicella_uncultured_b-<br>acterium                                              | 0 | 0                            | Anaerolineae_A4b_<br>uncultured_bacteriu-<br>m                    | 0.00<br>009<br>919<br>4        | 3.13<br>679<br>E-<br>05 |
| Selenomonas_sp.                                                      | 0.0<br>001<br>719<br>0        | 0.0<br>000<br>000<br>0 | Actinomycetaceae_un-<br>cultured_sp.                              | 0 | 0 | Parachlamydiaceae_<br>sp.                                      | 5.90<br>865<br>E-<br>05 | 1.86<br>848<br>E-<br>05 | Solitalea_uncultured_b-<br>acterium                     | 8.27<br>438<br>E-<br>05   | 2.61<br>659<br>E-<br>05   | Aquicella_unidentified                                                           | 0 | 0                            | ASV_19506                                                         | 0.00<br>009<br>919<br>4        | 3.13<br>679<br>E-<br>05 |
| ASV_21678                                                            | 0.0<br>001<br>705<br>3        | 0.0<br>000<br>539<br>3 | Actinomycetozoa_sp                                                | 0 | 0 | bacterium_PS7                                                  | 0.00<br>005<br>892<br>4 | 1.86<br>334<br>E-<br>05 | Sphingobacteriales_AK<br>YH767_sp.                      | 8.27<br>438<br>E-<br>05   | 2.61<br>659<br>E-<br>05   | Aquihabitans_daechun-<br>gensis                                                  | 0 | 0                            | Candidatus_Captivu-<br>s_uncultured_bact-<br>erium                | 0.00<br>009<br>919<br>4        | 3.13<br>679<br>E-<br>05 |
| Bacteroides_vulgatus                                                 | 0.0<br>001<br>705<br>3        | 0.0<br>000<br>539<br>3 | Actinoplanes_garbadin-<br>ensis                                   | 0 | 0 | Chlorella_pyrenoidosa                                          | 0.00<br>005<br>892<br>4 | 1.86<br>334<br>E-<br>05 | ASV_21242                                               | 7.61<br>074<br>E-<br>05   | 2.40<br>673<br>E-<br>05   | Aquisphaera_sp.                                                                  | 0 | 0                            | Clostridia_UCG-<br>014_uncultured_Acet-<br>ivibrio                | 0.00<br>009<br>919<br>4        | 3.13<br>679<br>E-<br>05 |
| Candidatus_Zambryski<br>bacteria_uncultured_ba-<br>cterium           | 0.0<br>001<br>705<br>3        | 0.0<br>000<br>539<br>3 | Actinoplanes_sp.                                                  | 0 | 0 | Fusobacterium_neor-<br>ophorum                                 | 0.00<br>005<br>892<br>4 | 1.86<br>334<br>E-<br>05 | ASV_4563                                                | 7.61<br>074<br>E-<br>05   | 2.40<br>673<br>E-<br>05   | Aquisphaera_uncultu-<br>red_bacterium                                            | 0 | 0                            | Gammaproteobacteri-<br>a_RTC24_sp.                                | 0.00<br>009<br>919<br>4        | 3.13<br>679<br>E-<br>05 |

|                                                           |            |           |                                                 |   |   |                                                    |             |             |                                                     |             |             |                                            |   |   |                                                              |             |             |
|-----------------------------------------------------------|------------|-----------|-------------------------------------------------|---|---|----------------------------------------------------|-------------|-------------|-----------------------------------------------------|-------------|-------------|--------------------------------------------|---|---|--------------------------------------------------------------|-------------|-------------|
| Cellvibrionaceae_uncultured_bacterium                     | 0.00016120 | 0.0005098 | Actinotalea_sp.                                 | 0 | 0 | Johnsonella_ignava                                 | 0.00058924  | 1.86334E-05 | Btvi28_wastewater-sludge_group_uncultured_bacterium | 7.61074E-05 | 2.40673E-05 | Arachis_hypogaea                           | 0 | 0 | Paludibacteraceae_uncultured_metagenome                      | 0.0009194   | 3.13679E-05 |
| Oscillibacter_sp.                                         | 0.00016120 | 0.0005098 | Actinotignum_sp.                                | 0 | 0 | Spongospora_subterranea                            | 0.00058924  | 1.86334E-05 | Microsillaceae_uncultured_sp.                       | 7.61074E-05 | 2.40673E-05 | Arboricooccus_pini                         | 0 | 0 | Polyangiaceae_sp.                                            | 0.0009194   | 3.13679E-05 |
| Sphingobacteriales_KD3-93_uncultured_bacterium            | 0.00016120 | 0.0000000 | Adhaeribacter_metagenome                        | 0 | 0 | Johnsonella_uncultured_Lachnospiraceae             | 5.27037E-05 | 1.66664E-05 | Saccharimonadales_uncultured_gamma                  | 7.61074E-05 | 2.40673E-05 | Arcicella_rigui                            | 0 | 0 | ASV_16940                                                    | 9.31287E-05 | 2.94499E-05 |
| Sutterellaceae_AAP99_sp.                                  | 0.00016120 | 0.0000000 | Adhaeribacter_uncultured_soil                   | 0 | 0 | Rhodothermaceae_uncultured_bacterium               | 5.27037E-05 | 1.66664E-05 | Sphingobacteriales_NS11-12_marine_group_sp.         | 7.61074E-05 | 2.40673E-05 | Arcicella_sp.                              | 0 | 0 | ASV_16946                                                    | 9.31287E-05 | 2.94499E-05 |
| Flexibacter_sp.                                           | 0.00016120 | 0.0005078 | Adhaeribacter_sp.                               | 0 | 0 | ASV_20126                                          | 4.71392E-05 | 1.49067E-05 | ASV_6710                                            | 7.48372E-05 | 2.36656E-05 | Arcicella_uncultured_bacterium             | 0 | 0 | Candidatus_Kaiserbacteria_uncultured_Parcubacteria           | 9.31287E-05 | 2.94499E-05 |
| Frigoribacterium_sp.                                      | 0.00016120 | 0.0005078 | Advenella_sp.                                   | 0 | 0 | Chloroplast_Cryptomonas_curvata                    | 4.71392E-05 | 1.49067E-05 | C1-B045_uncultured_gamma                            | 7.48372E-05 | 2.36656E-05 | Arcobacter_cryaerophilus                   | 0 | 0 | Micropepsis_pineolis                                         | 9.31287E-05 | 2.94499E-05 |
| MN_122.2a_uncultured_bacterium                            | 0.00016120 | 0.0005078 | Aenigmarchaeales_sp.                            | 0 | 0 | Paracoccus_sp.                                     | 4.71392E-05 | 1.49067E-05 | Erysipelotrichaceae_ZOR0006_uncultured_bacterium    | 7.48372E-05 | 2.36656E-05 | Arcobacter_sp.                             | 0 | 0 | Singulisphaera_uncultured_bacterium                          | 9.31287E-05 | 2.94499E-05 |
| Ohtaekwangia_metagenome                                   | 0.00016120 | 0.0005078 | Aenigmarchaeota_sp.                             | 0 | 0 | ASV_4563                                           | 0.00039391  | 1.24565E-05 | Pedospharaceae_uncultured_Verrucomicrobia           | 7.48372E-05 | 2.36656E-05 | Arcobacteraceae_sp.                        | 0 | 0 | ASV_2080                                                     | 8.65411E-05 | 2.73667E-05 |
| Quadriflora_Quadriflora_sp.                               | 0.00016120 | 0.0000000 | Aequorivita_sp.                                 | 0 | 0 | Bacteroidales_oral                                 | 0.00039391  | 1.24565E-05 | Plantibacter_sp.                                    | 7.48372E-05 | 2.36656E-05 | Arcobacteraceae_uncultured_sp.             | 0 | 0 | Candidatus_Harrisonbacteria                                  | 8.65411E-05 | 2.73667E-05 |
| Acidibacter_metagenome                                    | 0.00016120 | 0.0004659 | Aerococcaeae_sp.                                | 0 | 0 | Leptospira_metagenome                              | 0.00039391  | 1.24565E-05 | Sphingobacteria_bacterium                           | 7.48372E-05 | 2.36656E-05 | Arcobacter_sp.                             | 0 | 0 | Paracaedibacteraceae_uncultured_bacterium                    | 8.65411E-05 | 2.73667E-05 |
| ASV_16866                                                 | 0.00016120 | 0.0004659 | Aerococcaeae_uncultured_bacterium               | 0 | 0 | Rhodopirella_sp.                                   | 0.00039391  | 1.24565E-05 | ASV_3630                                            | 6.56666E-05 | 2.07653E-05 | Arcobacter_uncultured_bacterium            | 0 | 0 | Erysipelotrichaceae_uncultured_bacterium                     | 8.39123E-05 | 2.65354E-05 |
| ASV_16876                                                 | 0.00016120 | 0.0004659 | Aerococcus_sp.                                  | 0 | 0 | Actinomyces_dentalis                               | 3.53544E-05 | 1.118E-05   | Slackia_sp.                                         | 6.56666E-05 | 2.07653E-05 | Arenicellaceae_uncultured_prokaryote       | 0 | 0 | Rhodopseudomonas_sp.                                         | 8.39123E-05 | 2.65354E-05 |
| ASV_2103                                                  | 0.00016120 | 0.0004659 | Aeromicrobium_sp.                               | 0 | 0 | Candidatus_Falkowbacteria                          | 3.53544E-05 | 1.118E-05   | ASV_6176                                            | 6.23791E-05 | 1.9726E-05  | Arenimonas_oryziterrae                     | 0 | 0 | Sporomusaceae_uncultured_bacterium                           | 8.07412E-05 | 2.55326E-05 |
| Clostridia_vadinBB60_group_unidentified                   | 0.00016120 | 0.0004659 | Aeromonas_metagenome                            | 0 | 0 | Dyadobacter_uncultured_bacterium                   | 3.53544E-05 | 1.118E-05   | ASV_6240                                            | 6.23791E-05 | 1.9726E-05  | Arenimonas_sp.                             | 0 | 0 | uncultured_Asticcacaulis                                     | 8.07412E-05 | 2.55326E-05 |
| Methylophilaceae_sp.                                      | 0.00016120 | 0.0004659 | Aeromonas_sp.                                   | 0 | 0 | Nitrosomonadaceae_Etilin6067_sp.                   | 3.53544E-05 | 1.118E-05   | Candidatus_Methylophilus_uncultured_beta            | 6.23791E-05 | 1.9726E-05  | Aridibacter_sp.                            | 0 | 0 | ASV_18156                                                    | 7.76072E-05 | 2.45416E-05 |
| Nordella_uncultured_bacterium                             | 0.00016120 | 0.0004659 | Aeromonas_uncultured_gamma                      | 0 | 0 | Saccharimonadales_LWQ8_uncultured_s_oil            | 3.53544E-05 | 1.118E-05   | Candidatus_Vogelbacteria                            | 5.07392E-05 | 1.60448E-05 | Armatimonadales_metagenome                 | 0 | 0 | Erysipelotrichaceae_UCG-004_sp.                              | 7.76072E-05 | 2.45416E-05 |
| Picea_glauca                                              | 0.00016120 | 0.0004659 | Aerosphaera_uncultured_bacterium                | 0 | 0 | Bacteroidia_uncultured_bacterium                   | 3.51388E-05 | 1.11109E-05 | Pseudanabaena_PCC-6802_uncultured_cyanobacterium    | 5.07392E-05 | 1.60448E-05 | Armatimonadales_uncultured_bacterium       | 0 | 0 | Sphingobacteriales_NS11-12_marine_group_uncultured_bacterium | 7.76072E-05 | 2.45416E-05 |
| Rhodobacteraceae_Yaungia_sp.                              | 0.00016120 | 0.0004659 | Aerosphaera_sp.                                 | 0 | 0 | Candidatus_Uhrbacteria_metagenome                  | 3.51388E-05 | 1.11109E-05 | Allerella_sp.                                       | 4.98915E-05 | 1.57771E-05 | Armatimonadales_uncultured_Chloroflexi     | 0 | 0 | Yersiniaceae_Yersinia_sp.                                    | 7.76072E-05 | 2.45416E-05 |
| Gemmataceae_uncultured_sp.                                | 0.00016120 | 0.0004373 | Aestuariicella_uncultured_bacterium             | 0 | 0 | Gemmata_uncultured_Planctomycetales                | 3.51388E-05 | 1.11109E-05 | ASV_21560                                           | 4.98915E-05 | 1.57771E-05 | Armatimonadales_uncultured_eubacterium     | 0 | 0 | Acidimicrobia_uncultured_metagenome                          | 7.61528E-05 | 2.40816E-05 |
| Gemmataceae_uncultured_prokaryote                         | 0.00016120 | 0.0004373 | Afia_genosp.                                    | 0 | 0 | Nakamurella_sp.                                    | 3.51388E-05 | 1.11109E-05 | Candidatus_Campbellbacteria_uncultured_bacterium    | 4.98915E-05 | 1.57771E-05 | Armatimonadales_uncultured_Armatimonadetes | 0 | 0 | ASV_305                                                      | 7.61528E-05 | 2.40816E-05 |
| Saccharimonadales_uncultured_bacterium                    | 0.00016120 | 0.0000000 | Agathobacter_sp.                                | 0 | 0 | ASV_21907                                          | 2.35696E-05 | 7.45336E-06 | Chloroflexi_Gtt-GS-136_sp.                          | 4.98915E-05 | 1.57771E-05 | Armatimonadia_sp.                          | 0 | 0 | ASV_346                                                      | 7.61528E-05 | 2.40816E-05 |
| Solirubrobacteriales_67-14_Solirubrobacteriales_bacterium | 0.00016120 | 0.0000000 | Aggregatibacter_actinomycesommitans             | 0 | 0 | Pedobacter_sp.                                     | 2.35696E-05 | 7.45336E-06 | Cytophaga_sp.                                       | 4.98915E-05 | 1.57771E-05 | Armatimonadota_uncultured_bacterium        | 0 | 0 | Bulleidia_extracta                                           | 7.61528E-05 | 2.40816E-05 |
| Caldalkalibacillus_uncultured_compost                     | 0.00016120 | 0.0004353 | Aggregatibacter_sp.                             | 0 | 0 | Rubinisphaeraceae_SH-PL14_uncultured_planctomycete | 2.35696E-05 | 7.45336E-06 | Ruminococcus_torques_group_uncultured_Clostridiales | 4.98915E-05 | 1.57771E-05 | Armatimonadota_uncultured_metagenome       | 0 | 0 | Armatimonadales_uncultured_bacterium                         | 7.43955E-05 | 2.35259E-05 |
| Candidatus_Woykebacteria_uncultured_Microgenomates        | 0.00016120 | 0.0004353 | Agitococcus_lubricus_group_uncultured_bacterium | 0 | 0 | Faecalibacterium_metagenome                        | 1.96955E-05 | 6.22826E-06 | Sandaracinaceae_uncultured_sp.                      | 4.98915E-05 | 1.57771E-05 | Armatimonadota_uncultured_sp.              | 0 | 0 | ASV_1837                                                     | 7.43955E-05 | 2.35259E-05 |
| Phreatobacter_uncultured_bacterium                        | 0.00016120 | 0.0004353 | Agitococcus_lubricus_group_sp.                  | 0 | 0 | 009E01-B-SD-P15_uncultured_bacterium               | 0           | 0           | Candidatus_Jorgensenbacteria_sp.                    | 4.37771E-05 | 1.38435E-05 | Armatimonadota_uncultured_uncultured_soil  | 0 | 0 | Candidatus_Kerfeldbacteria_sp.                               | 7.43955E-05 | 2.35259E-05 |
| Rhizobiaceae_uncultured_metagenome                        | 0.00016120 | 0.0000000 | Agrococcus_sp.                                  | 0 | 0 | 1013-28-CG33_uncultured_s_oil                      | 0           | 0           | Methanobrevibacter_archaeon_enrichment              | 4.37771E-05 | 1.38435E-05 | Armatimonas_sp.                            | 0 | 0 | Candidatus_Protocliamydia                                    | 7.43955E-05 | 2.35259E-05 |
| ASV_256                                                   | 0.00016120 | 0.0003932 | Agromyces_sp.                                   | 0 | 0 | Abditibacterium_sp.                                | 0           | 0           | Propionispirapauvivorans                            | 4.37771E-05 | 1.38435E-05 | Armatimonas_uncultured_bacterium           | 0 | 0 | Prevotellaceae_UCG004_uncultured_bacterium                   | 7.43955E-05 | 2.35259E-05 |
| Candidatus_Yanofskybacteria_uncultured_bacterium          | 0.00016120 | 0.0003932 | Ahniella_affgens                                | 0 | 0 | Absconditabacteriales_(SR1)_metagenome             | 0           | 0           | 009E01-B-SD-P15_uncultured_bacterium                | 0           | 0           | Arsenicococcus_boldensis                   | 0 | 0 | Skermanella_sp.                                              | 7.43955E-05 | 2.35259E-05 |
| ASV_18078                                                 | 0.00016120 | 0.0003883 | Ahniella_metagenome                             | 0 | 0 | Absconditabacteriales_(SR1)_uncultured_bacterium   | 0           | 0           | 1013-28-CG33_uncultured_soil                        | 0           | 0           | Arthrobacter_sp.                           | 0 | 0 | ASV_19928                                                    | 6.92329E-05 | 2.18934E-05 |
| ASV_2889                                                  | 0.00016120 | 0.0003883 | Ahniella_uncultured_bacterium                   | 0 | 0 | Absconditabacteriales_(SR1)_candidate_division     | 0           | 0           | Abditibacterium_sp.                                 | 0           | 0           | Aspergillus_nidulans                       | 0 | 0 | Candidatus_Falkowbacteria_uncultured_prokaryote              | 6.92329E-05 | 2.18934E-05 |

|                                                                    |            |            |                                       |   |   |                                                             |   |   |                                                             |   |   |                   |   |   |                                                |             |             |
|--------------------------------------------------------------------|------------|------------|---------------------------------------|---|---|-------------------------------------------------------------|---|---|-------------------------------------------------------------|---|---|-------------------|---|---|------------------------------------------------|-------------|-------------|
| Bacteroidales_RF16_groupuncultured_Parabacteroides                 | 0.00012279 | 0.00003883 | Akkermansia_sp.                       | 0 | 0 | Abconditabacteriales_(SR1)_sp.                              | 0 | 0 | Abconditabacteriales_(SR1)_metagenome                       | 0 | 0 | Asticcacaulis_sp. | 0 | 0 | Bryobacter_sp.                                 | 6.71299E-05 | 2.12283E-05 |
| Campylobacteria_uncultured_sp.                                     | 0.00012279 | 0.00003883 | Akkermansia_uncultured_bacterium      | 0 | 0 | Abconditabacteriales_(SR1)_SR1_bacterium                    | 0 | 0 | Abconditabacteriales_(SR1)_uncultured_bacterium             | 0 | 0 | ASV_10003         | 0 | 0 | Sericytochromatium_identified                  | 6.71299E-05 | 2.12283E-05 |
| Candidatus_Obscuribacter_sp.                                       | 0.00012279 | 0.00003883 | Alcaligenaceae_sp.                    | 0 | 0 | Abconditabacteriales_(SR1)_uncultured_candidate             | 0 | 0 | Abconditabacteriales_(SR1)_candidate_division               | 0 | 0 | ASV_10004         | 0 | 0 | ASV_19447                                      | 6.20858E-05 | 1.96333E-05 |
| Chloroplast_Monophidium_neglectum                                  | 0.00012279 | 0.00003883 | Alcaligenes_sp.                       | 0 | 0 | Abconditabacteriales_(SR1)_uncultured_Epsilonproteobacteria | 0 | 0 | Abconditabacteriales_(SR1)_sp.                              | 0 | 0 | ASV_10035         | 0 | 0 | DEV007_uncultured_verrucomicrobium             | 6.20858E-05 | 1.96333E-05 |
| Coriobacterii_OPB41_uncultured_soil                                | 0.00012279 | 0.00003883 | Algoriphagus_sp.                      | 0 | 0 | Abconditabacteriales_(SR1)_uncultured_organism              | 0 | 0 | Abconditabacteriales_(SR1)_SR1_bacterium                    | 0 | 0 | ASV_10043         | 0 | 0 | Faecalibacterium_metalenome                    | 6.20858E-05 | 1.96333E-05 |
| Desulfuromonada_PB19_sp.                                           | 0.00012279 | 0.00003883 | Algoriphagus_uncultured_Bacteroidetes | 0 | 0 | Abconditabacteriales_(SR1)_uncultured_prokaryote            | 0 | 0 | Abconditabacteriales_(SR1)_uncultured_candidate             | 0 | 0 | ASV_10098         | 0 | 0 | Pajarocellibacterium_uncultured_delta          | 6.20858E-05 | 1.96333E-05 |
| Holophagaceae_sp.                                                  | 0.00012279 | 0.00003883 | Algoriphagus_uncultured_Hongiella     | 0 | 0 | ABY1_sp.                                                    | 0 | 0 | Abconditabacteriales_(SR1)_uncultured_Epsilonproteobacteria | 0 | 0 | ASV_10170         | 0 | 0 | Simkaniaceae_Ga0074140_sp.                     | 6.05559E-05 | 1.91495E-05 |
| Lactobacillus_senioris                                             | 0.00012279 | 0.00003883 | Aliidomarina_uncultured_bacterium     | 0 | 0 | Acanthopleuribacterium_uncultured_bacterium                 | 0 | 0 | Abconditabacteriales_(SR1)_uncultured_organism              | 0 | 0 | ASV_10179         | 0 | 0 | Spongibacteraceae_BD1-7_clade_metagenome       | 6.05559E-05 | 1.91495E-05 |
| Limnochordia_MBA03_uncultured_bacterium                            | 0.00012279 | 0.00003883 | Aliidongia_dinghuensis                | 0 | 0 | Acetitomaculum_uncultured_bacterium                         | 0 | 0 | Abconditabacteriales_(SR1)_uncultured_prokaryote            | 0 | 0 | ASV_1021          | 0 | 0 | Sporosarcina_sp.                               | 6.05559E-05 | 1.91495E-05 |
| ASV_18142                                                          | 0.0001471  | 0.00003627 | Aliivibrio_sp.                        | 0 | 0 | Acetitomaculum_uncultured_rumen                             | 0 | 0 | ABY1_sp.                                                    | 0 | 0 | ASV_10253         | 0 | 0 | Phaselicystis_uncultured                       | 5.19247E-05 | 1.642E-05   |
| Babeliales_metagenome                                              | 0.0001471  | 0.00003627 | Alishewanella_sp.                     | 0 | 0 | Acetitomaculum_sp.                                          | 0 | 0 | Acanthopleuribacterium_uncultured_bacterium                 | 0 | 0 | ASV_10292         | 0 | 0 | Aenigmarchaeales_sp.                           | 5.03474E-05 | 1.59212E-05 |
| Patescibacteria_CPR2_uncultured_eubacterium                        | 0.0001471  | 0.00003627 | Alishewanella_uncultured_bacterium    | 0 | 0 | Acetivibrio_uncultured_bacterium                            | 0 | 0 | Acetitomaculum_uncultured_bacterium                         | 0 | 0 | ASV_10316         | 0 | 0 | ASV_21236                                      | 5.03474E-05 | 1.59212E-05 |
| Patescibacteria_CPR2_uncultured_Firmicutes                         | 0.0001471  | 0.00003627 | Alistipes_gut_metagenome              | 0 | 0 | Acetoanaerobium_uncultured_bacterium                        | 0 | 0 | Acetitomaculum_uncultured_rumen                             | 0 | 0 | ASV_10346         | 0 | 0 | Bacilli_RF39_uncultured_Erysipelotrichaceae    | 5.03474E-05 | 1.59212E-05 |
| Propioniciclava_sp.                                                | 0.0001471  | 0.00003627 | Alistipes_sp.                         | 0 | 0 | Acetobacter_sp.                                             | 0 | 0 | Acetitomaculum_sp.                                          | 0 | 0 | ASV_10385         | 0 | 0 | Bacterivoracaceae_sp.                          | 5.03474E-05 | 1.59212E-05 |
| Saccharimonadales_TM7_sp.                                          | 0.0001471  | 0.00003627 | Alistipes_uncultured_Alistipes        | 0 | 0 | Acetobacteraceae_sp.                                        | 0 | 0 | Acetoanaerobium_uncultured_bacterium                        | 0 | 0 | ASV_10460         | 0 | 0 | Brachymonas_sp.                                | 5.03474E-05 | 1.59212E-05 |
| Tahibacter_sp.                                                     | 0.0001471  | 0.00003627 | Alistipes_uncultured_bacterium        | 0 | 0 | Acetobacteraceae_uncultured_sp.                             | 0 | 0 | Acetobacteraceae_sp.                                        | 0 | 0 | ASV_10537         | 0 | 0 | Chitinophagales_37-13_sp.                      | 5.03474E-05 | 1.59212E-05 |
| ASV_19488                                                          | 0.0001747  | 0.00003398 | Alistipes_uncultured_Bacteroidetes    | 0 | 0 | Acetobacterium_sp.                                          | 0 | 0 | Acetobacteraceae_uncultured_bacterium                       | 0 | 0 | ASV_10583         | 0 | 0 | Desulfobacterota_uncultured_Desulfuromonadales | 5.03474E-05 | 1.59212E-05 |
| ASV_19490                                                          | 0.0001747  | 0.00003398 | Aliterella_cyanobacterium_OU_20       | 0 | 0 | Acetothermia_uncultured_bacterium                           | 0 | 0 | Acetobacteraceae_uncultured_metagenome                      | 0 | 0 | ASV_10605         | 0 | 0 | Methylacidiphilaceae_uncultured_metagenome     | 5.03474E-05 | 1.59212E-05 |
| Antriccoccus_suffuscus                                             | 0.00009823 | 0.00003106 | Aliterella_sp.                        | 0 | 0 | Acholeplasma_uncultured_bacterium                           | 0 | 0 | Acetobacteraceae_uncultured_sp.                             | 0 | 0 | ASV_10606         | 0 | 0 | Obscuribacteraceae_metagenome                  | 5.03474E-05 | 1.59212E-05 |
| ASV_19368                                                          | 0.00009823 | 0.00003106 | Aliterella_uncultured_bacterium       | 0 | 0 | Acholeplasma_axanthum                                       | 0 | 0 | Acetobacterium_sp.                                          | 0 | 0 | ASV_10613         | 0 | 0 | Pelosinus_uncultured_bacterium                 | 5.03474E-05 | 1.59212E-05 |
| Babelialescandidate_division                                       | 0.00009823 | 0.00003106 | Alkalibacter_uncultured_bacterium     | 0 | 0 | Acholeplasma_brassicae                                      | 0 | 0 | Acetothermia_uncultured_bacterium                           | 0 | 0 | ASV_10814         | 0 | 0 | SB-5_uncultured_soil                           | 5.03474E-05 | 1.59212E-05 |
| Cryptobacterium_sp.                                                | 0.00009823 | 0.00003106 | Alkalibacterium_uncultured_bacterium  | 0 | 0 | Acholeplasma_laidlawii                                      | 0 | 0 | Acholeplasma_axanthum                                       | 0 | 0 | ASV_10821         | 0 | 0 | Sphingobacteriales_KD3-93_sp.                  | 5.03474E-05 | 1.59212E-05 |
| Gemmata_uncultured_planctomycete                                   | 0.00009823 | 0.00003106 | Alkanibacter_metagenome               | 0 | 0 | Acholeplasma_morum                                          | 0 | 0 | Acholeplasma_brassicae                                      | 0 | 0 | ASV_10869         | 0 | 0 | ASV_21606                                      | 0.00049597  | 1.56839E-05 |
| Geodermatophilaceae_sp.                                            | 0.00009823 | 0.00003106 | Alkanindiges_sp.                      | 0 | 0 | Acholeplasma_sp.                                            | 0 | 0 | Acholeplasma_laidlawii                                      | 0 | 0 | ASV_10995         | 0 | 0 | Bacteroides_plebeius                           | 0.00049597  | 1.56839E-05 |
| Gracilbacteria_JGI_000069-P22_sp.                                  | 0.00009823 | 0.00003106 | Alkanindiges_uncultured_bacterium     | 0 | 0 | Acholeplasmataceae_EMP-G18_uncultured_Mollicutes            | 0 | 0 | Acholeplasma_morum                                          | 0 | 0 | ASV_11002         | 0 | 0 | Clavibacter_sp.                                | 0.00049597  | 1.56839E-05 |
| Sphingobacteriales_NS11-12_marine_groupuncultured_Flexibacteraceae | 0.00009823 | 0.00003106 | Alkanindiges_uncultured_gamma         | 0 | 0 | Acholeplasmauncultured_Acholeplasmataceae                   | 0 | 0 | Acholeplasma_sp.                                            | 0 | 0 | ASV_11030         | 0 | 0 | Coxiella_uncultured_bacterium                  | 0.00049597  | 1.56839E-05 |
| Tissierella_uncultured_bacterium                                   | 0.00009823 | 0.00003106 | Allobranchibius_sp.                   | 0 | 0 | Achromatium_sp.                                             | 0 | 0 | Acholeplasmataceae_EMP-G18_uncultured_Mollicutes            | 0 | 0 | ASV_11102         | 0 | 0 | Granulicella_sp.                               | 0.00049597  | 1.56839E-05 |
| ASV_2061                                                           | 0.00009444 | 0.00002986 | Alloicoccus_uncultured_bacterium      | 0 | 0 | Acidaminobacterium_uncultured_bacterium                     | 0 | 0 | Acholeplasmauncultured_Acholeplasmataceae                   | 0 | 0 | ASV_11103         | 0 | 0 | Phycosphaeraceae_SM1A02_uncultured_bacterium   | 4.65643E-05 | 1.47249E-05 |
| Candidatus_Aquirestis_sp.                                          | 0.00009444 | 0.00002986 | Alloprevotella_rava                   | 0 | 0 | Acidaminococcaceae_uncultured_bacterium                     | 0 | 0 | Acidaminobacterium_uncultured_bacterium                     | 0 | 0 | ASV_11163         | 0 | 0 | Silvanigrella_Geobacter_sp.                    | 4.65643E-05 | 1.47249E-05 |
| Candidatus_Magasankbacteria_uncultured_Parcubacteria               | 0.00009177 | 0.00002902 | Alloprevotella_sp.                    | 0 | 0 | Acidibacter_metagenome                                      | 0 | 0 | Acidaminococcaceae_uncultured_bacterium                     | 0 | 0 | ASV_11164         | 0 | 0 | Corynebacterium_mycetoids                      | 4.03706E-05 | 1.27663E-05 |
| Candidatus_Peribacterium_a_sp.                                     | 0.00009177 | 0.00002902 | Alloprevotella_tannerae               | 0 | 0 | Acidibacterium_uncultured_bacterium                         | 0 | 0 | Acidibacterium_metagenome                                   | 0 | 0 | ASV_11306         | 0 | 0 | Flavobacterium_unidentified                    | 4.03706E-05 | 1.27663E-05 |

|                                                               | 917<br>7               | 290<br>2               |                                                            |   |   |                                                      |   |   |                                                      |   |   |           |   |   |                                                             | E-<br>05                | E-<br>05                |
|---------------------------------------------------------------|------------------------|------------------------|------------------------------------------------------------|---|---|------------------------------------------------------|---|---|------------------------------------------------------|---|---|-----------|---|---|-------------------------------------------------------------|-------------------------|-------------------------|
| Chitinophaga_niastensis                                       | 0.0<br>000<br>917<br>7 | 0.0<br>000<br>290<br>2 | Alloprevotella_uncultured_Bacteroidales                    | 0 | 0 | Acidibacter_sp.                                      | 0 | 0 | Acidibacter_uncultured_bacterium                     | 0 | 0 | ASV_11362 | 0 | 0 | Acidaminobacter_uncultured_bacterium                        | 3.46<br>164<br>E-<br>05 | 1.09<br>467<br>E-<br>05 |
| Conexibacter_uncultured_bacterium                             | 0.0<br>000<br>917<br>7 | 0.0<br>000<br>290<br>2 | Allorhizobium-Neorhizobium-Pararhizobium-Rhizobium_sp.     | 0 | 0 | Acidimicrobia_IMCC26256_metagenome                   | 0 | 0 | Acidibacter_sp.                                      | 0 | 0 | ASV_11393 | 0 | 0 | ASV_2510                                                    | 3.46<br>164<br>E-<br>05 | 1.09<br>467<br>E-<br>05 |
| Eubacterium_coprostanoligenes_group_uncultured_Clostridia     | 0.0<br>000<br>917<br>7 | 0.0<br>000<br>290<br>2 | Alloscardovia_omnicolorans                                 | 0 | 0 | Acidimicrobia_IMCC26256_sp.                          | 0 | 0 | Acidimicrobia_IMCC26256_metagenome                   | 0 | 0 | ASV_11399 | 0 | 0 | Chloroplast_sp.                                             | 3.46<br>164<br>E-<br>05 | 1.09<br>467<br>E-<br>05 |
| MBNT15uncultured_Anaeromyxobacter                             | 0.0<br>000<br>917<br>7 | 0.0<br>000<br>290<br>2 | allotenuales_AKIW781_uncultured_bacterium                  | 0 | 0 | Acidimicrobia_IMCC26256uncultured_bacterium          | 0 | 0 | Acidimicrobia_IMCC26256_sp.                          | 0 | 0 | ASV_11414 | 0 | 0 | Bacteriovorax_sp.                                           | 3.35<br>649<br>E-<br>05 | 1.06<br>142<br>E-<br>05 |
| Pirellulaceae_uncultured_bacterium                            | 0.0<br>000<br>917<br>7 | 0.0<br>000<br>290<br>2 | alpha_proteobacterium                                      | 0 | 0 | Acidimicrobia_IMCC26256_uncultured_soil              | 0 | 0 | Acidimicrobia_IMCC26256_uncultured_bacterium         | 0 | 0 | ASV_11446 | 0 | 0 | LCP-89_uncultured_bacterium                                 | 3.35<br>649<br>E-<br>05 | 1.06<br>142<br>E-<br>05 |
| ASV_7664                                                      | 0.0<br>000<br>885<br>7 | 0.0<br>000<br>280<br>1 | Alphaproteobacteria_bacterium                              | 0 | 0 | Acidimicrobia_IMCC26256uncultured_Aciditerrimonas    | 0 | 0 | Acidimicrobia_IMCC26256_uncultured_soil              | 0 | 0 | ASV_11492 | 0 | 0 | ASV_2889                                                    | 3.10<br>429<br>E-<br>05 | 9.81<br>663<br>E-<br>06 |
| Chitinophagales_uncultured_delta                              | 0.0<br>000<br>806<br>0 | 0.0<br>000<br>254<br>9 | Alphaproteobacteria_sp.                                    | 0 | 0 | Acidimicrobia_IMCC26256uncultured_Actinobacterium    | 0 | 0 | Acidimicrobia_IMCC26256uncultured_Actinobacterium    | 0 | 0 | ASV_11530 | 0 | 0 | Candidatus_Vogelbacteria                                    | 3.10<br>429<br>E-<br>05 | 9.81<br>663<br>E-<br>06 |
| Spingobacterales_NS11-12_marine_groupuncultured_Bacteroidetes | 0.0<br>000<br>806<br>0 | 0.0<br>000<br>000<br>0 | Alphaproteobacteria_uncultured_bacterium                   | 0 | 0 | Acidimicrobia_IMCC26256uncultured_Actinomyetales     | 0 | 0 | Acidimicrobia_IMCC26256uncultured_actinobacterium    | 0 | 0 | ASV_11581 | 0 | 0 | Lentimicrobium_metagenome                                   | 3.10<br>429<br>E-<br>05 | 9.81<br>663<br>E-<br>06 |
| Spingopyxis_uncultured_bacterium                              | 0.0<br>000<br>806<br>0 | 0.0<br>000<br>000<br>0 | Alphaproteobacteria_uncultured_metagenome                  | 0 | 0 | Acidimicrobia_sp.                                    | 0 | 0 | Acidimicrobia_sp.                                    | 0 | 0 | ASV_1161  | 0 | 0 | ASV_2160                                                    | 2.47<br>985<br>E-<br>05 | 7.84<br>197<br>E-<br>06 |
| ASV_2386                                                      | 0.0<br>000<br>736<br>7 | 0.0<br>000<br>233<br>0 | Alphaproteobacteria_uncultured_sp.                         | 0 | 0 | Acidimicrobia_uncultured_bacterium                   | 0 | 0 | Acidimicrobia_uncultured_bacterium                   | 0 | 0 | ASV_11616 | 0 | 0 | 1013-28-CG33_uncultured_soil                                | 0                       | 0                       |
| Bryobacter_metagenome                                         | 0.0<br>000<br>736<br>7 | 0.0<br>000<br>233<br>0 | Alphaproteobacteria_uncultured_Alphaproteobacteria         | 0 | 0 | Acidimicrobia_uncultured_metagenome                  | 0 | 0 | Acidimicrobia_uncultured_metagenome                  | 0 | 0 | ASV_11696 | 0 | 0 | Abditobacterium_sp.                                         | 0                       | 0                       |
| Caedibacteraceae_uncultured_bacterium                         | 0.0<br>000<br>736<br>7 | 0.0<br>000<br>233<br>0 | Alphaproteobacteria_uncultured_bacterium_enrichment        | 0 | 0 | Acidimicrobia_uncultured_sp.                         | 0 | 0 | Acidimicrobia_uncultured_sp.                         | 0 | 0 | ASV_11732 | 0 | 0 | Absonditabacteriales_(SR1)_metagenome                       | 0                       | 0                       |
| Desulfobacteraceae_uncultured_delta                           | 0.0<br>000<br>736<br>7 | 0.0<br>000<br>233<br>0 | Alphaproteobacteria_uncultured_eubacterium                 | 0 | 0 | Acidimicrobia_uncultured_Actinimicrobia              | 0 | 0 | Acidimicrobia_uncultured_Actinimicrobia              | 0 | 0 | ASV_11789 | 0 | 0 | Absonditabacteriales_(SR1)_SR1_uncultured_bacterium         | 0                       | 0                       |
| Lentimicrobium_sp.                                            | 0.0<br>000<br>736<br>7 | 0.0<br>000<br>233<br>0 | Alphaproteobacteria_uncultured_gut_metagenome              | 0 | 0 | Acidimicrobia_uncultured_actinobacterium             | 0 | 0 | Acidimicrobia_uncultured_actinobacterium             | 0 | 0 | ASV_11832 | 0 | 0 | Absonditabacteriales_(SR1)_candidate_division               | 0                       | 0                       |
| Prolixibacteraceae_uncultured_prokaryote                      | 0.0<br>000<br>736<br>7 | 0.0<br>000<br>000<br>0 | Alphaproteobacteria_uncultured_Laobacterium_aquatlie       | 0 | 0 | Acidimicrobia_uncultured_bacterium_YC-ZSS-LKJ199     | 0 | 0 | Acidimicrobia_uncultured_Actinomyetales              | 0 | 0 | ASV_12032 | 0 | 0 | Absonditabacteriales_(SR1)_sp.                              | 0                       | 0                       |
| Silene dioica                                                 | 0.0<br>000<br>736<br>7 | 0.0<br>000<br>000<br>0 | Alphaproteobacteria_uncultured_Novosphingobium             | 0 | 0 | Acidiphilium_uncultured_bacterium                    | 0 | 0 | Acidimicrobia_uncultured_bacterium_YC-ZSS-LKJ199     | 0 | 0 | ASV_1208  | 0 | 0 | Absonditabacteriales_(SR1)_SR1_bacterium                    | 0                       | 0                       |
| Verrucomicrobiae_uncultured_metagenome                        | 0.0<br>000<br>736<br>7 | 0.0<br>000<br>000<br>0 | Alphaproteobacteria_uncultured_Rhodospirillaceae_bacterium | 0 | 0 | Acidiphilium_sp.                                     | 0 | 0 | Acidiphilium_uncultured_bacterium                    | 0 | 0 | ASV_12134 | 0 | 0 | Absonditabacteriales_(SR1)_uncultured_candidate             | 0                       | 0                       |
| Aerococcus_sp.                                                | 0.0<br>000<br>688<br>2 | 0.0<br>000<br>217<br>6 | Altererythrobacter_alpha_proteobacterium                   | 0 | 0 | Acidisoma_sp.                                        | 0 | 0 | Acidiphilium_sp.                                     | 0 | 0 | ASV_12280 | 0 | 0 | Absonditabacteriales_(SR1)_uncultured_Epsilonproteobacteria | 0                       | 0                       |
| ASV_20627                                                     | 0.0<br>000<br>688<br>2 | 0.0<br>000<br>217<br>6 | Altererythrobacter_sp.                                     | 0 | 0 | Acidithiobacillaceae_KCM-B-112_sp.                   | 0 | 0 | Acidisoma_sp.                                        | 0 | 0 | ASV_12284 | 0 | 0 | Absonditabacteriales_(SR1)_uncultured_organism              | 0                       | 0                       |
| ASV_3526                                                      | 0.0<br>000<br>688<br>2 | 0.0<br>000<br>217<br>6 | Alysiella_sp.                                              | 0 | 0 | Acidobacteria_bacterium                              | 0 | 0 | Acidithiobacillaceae_KCM-B-112_sp.                   | 0 | 0 | ASV_12313 | 0 | 0 | Absonditabacteriales_(SR1)_uncultured_prokaryote            | 0                       | 0                       |
| Campylobacter_ureolyticus                                     | 0.0<br>000<br>688<br>2 | 0.0<br>000<br>217<br>6 | Alysiella_uncultured_bacterium                             | 0 | 0 | Acidobacteriaceae_(Subgroup_1)_sp.                   | 0 | 0 | Acidithiobacillus_ferroxidans                        | 0 | 0 | ASV_12382 | 0 | 0 | ABY1_sp.                                                    | 0                       | 0                       |
| Gallionellaceae_sp.                                           | 0.0<br>000<br>688<br>2 | 0.0<br>000<br>217<br>6 | Amaricoccus_sp.                                            | 0 | 0 | Acidobacteriaceae_Elev-16S-1166_uncultured_bacterium | 0 | 0 | Acidobacteriaceae_(Subgroup_1)_sp.                   | 0 | 0 | ASV_12391 | 0 | 0 | Acanthopleuribacter_uncultured_bacterium                    | 0                       | 0                       |
| Hungateidostriaceae_HN-HF0106_sp.                             | 0.0<br>000<br>688<br>2 | 0.0<br>000<br>217<br>6 | Amaricoccus_tamworthensis                                  | 0 | 0 | Acidobacteriaceae_sp.                                | 0 | 0 | Acidobacteriaceae_Elev-16S-1166_sp.                  | 0 | 0 | ASV_12397 | 0 | 0 | Acetitomaculum_uncultured_bacterium                         | 0                       | 0                       |
| Mariprofundus_sp.                                             | 0.0<br>000<br>688<br>2 | 0.0<br>000<br>217<br>6 | Amb-16S-1323_uncultured_bacterium                          | 0 | 0 | Acidocella_uncultured_bacterium                      | 0 | 0 | Acidobacteriaceae_Elev-16S-1166_uncultured_bacterium | 0 | 0 | ASV_12420 | 0 | 0 | Acetitomaculum_uncultured_rumen                             | 0                       | 0                       |
| Oscillospiraceae_NK4A214_group_uncultured_rumen               | 0.0<br>000<br>688<br>2 | 0.0<br>000<br>217<br>6 | Aminobacter_sp.                                            | 0 | 0 | Acidothermus_uncultured_bacterium                    | 0 | 0 | Acidocella_uncultured_bacterium                      | 0 | 0 | ASV_12452 | 0 | 0 | Acetitomaculum_sp.                                          | 0                       | 0                       |
| Planctomycetota_OM190_uncultured_soil                         | 0.0<br>000<br>688<br>2 | 0.0<br>000<br>217<br>6 | Ammonibacillus_agari perforans                             | 0 | 0 | Acidothermus_sp.                                     | 0 | 0 | Acidothermus_uncultured_bacterium                    | 0 | 0 | ASV_12478 | 0 | 0 | Acetivibrio_uncultured_bacterium                            | 0                       | 0                       |
| Prostheobacter_sp.                                            | 0.0<br>000<br>688<br>2 | 0.0<br>000<br>000<br>0 | Ammoniphilus_oxalaticus                                    | 0 | 0 | Acidovorax_sp.                                       | 0 | 0 | Acidothermus_sp.                                     | 0 | 0 | ASV_12525 | 0 | 0 | Acetoanaerobium_uncultured_bacterium                        | 0                       | 0                       |
| Rikenellaceae_RC9_group_sp.                                   | 0.0<br>000<br>688<br>2 | 0.0<br>000<br>589<br>8 | Amnibacterium_sp.                                          | 0 | 0 | Acinetobacter_metagenome                             | 0 | 0 | Acidovorax_sp.                                       | 0 | 0 | ASV_12573 | 0 | 0 | Acetobacter_sp.                                             | 0                       | 0                       |
| Roseococcus_uncultured_bacterium                              | 0.0<br>000<br>688<br>2 | 0.0<br>000<br>000<br>0 | Amnipila_sp.                                               | 0 | 0 | Acinetobacter_baumannii                              | 0 | 0 | Acinetobacter_metagenome                             | 0 | 0 | ASV_12623 | 0 | 0 | Acetobacteraceae_sp.                                        | 0                       | 0                       |
| ASV_6240                                                      | 0.0<br>000<br>621<br>7 | 0.0<br>000<br>196<br>6 | Amycolatopsis_sp.                                          | 0 | 0 | Acinetobacter_kyonggiensis                           | 0 | 0 | Acinetobacter_baumannii                              | 0 | 0 | ASV_12634 | 0 | 0 | Acetobacteraceae_uncultured_bacterium                       | 0                       | 0                       |

|                                                     |            |            |                                        |   |   |                                                     |   |   |                                                     |   |   |           |   |   |                                                  |   |   |
|-----------------------------------------------------|------------|------------|----------------------------------------|---|---|-----------------------------------------------------|---|---|-----------------------------------------------------|---|---|-----------|---|---|--------------------------------------------------|---|---|
| Armatimonas_uncultured_bacterium                    | 0.00005373 | 0.0001699  | Anaerobacterium_uncultured_bacterium   | 0 | 0 | Acinetobacter_sp.                                   | 0 | 0 | Acinetobacter_kyonggiensis                          | 0 | 0 | ASV_12731 | 0 | 0 | Acetobacteraceae_uncultured_metagenome           | 0 | 0 |
| Bacteroidia_sp.                                     | 0.00005373 | 0.0001699  | Anaerobiospirillum_succinicoproductens | 0 | 0 | Acinetobacter_towneri                               | 0 | 0 | Acinetobacter_sp.                                   | 0 | 0 | ASV_12760 | 0 | 0 | Acetobacteraceae_uncultured_sp.                  | 0 | 0 |
| TaibaiellaTaibaiella_sp.                            | 0.00005373 | 0.0000000  | Anaerococcus_hydrogenalis              | 0 | 0 | Acremonium_fucci                                    | 0 | 0 | Acinetobacter_towneri                               | 0 | 0 | ASV_12772 | 0 | 0 | Acetobacterium_sp.                               | 0 | 0 |
| Woeseearchaeales_SC_GC_AA011-D5_uncultured_archaeon | 0.00005373 | 0.0000000  | Anaerococcus_octavius                  | 0 | 0 | Actinobacillus_sp.                                  | 0 | 0 | Acremonium_fucci                                    | 0 | 0 | ASV_12862 | 0 | 0 | Acetothermia_uncultured_bacterium                | 0 | 0 |
| Pirellulaceae_uncultured_metagenome                 | 0.00004911 | 0.00001553 | Anaerococcus_prevotii                  | 0 | 0 | Actinobacteria_0319-7L14_uncultured_actinobacterium | 0 | 0 | Actinobacillus_sp.                                  | 0 | 0 | ASV_12880 | 0 | 0 | Acholeplasma_uncultured_bacterium                | 0 | 0 |
| Acholeplasma_sp.                                    | 0.00004588 | 0.00001451 | Anaerococcus_sp.                       | 0 | 0 | Actinobacteria_PeM15_bacterium_rJ7                  | 0 | 0 | Actinobacteria_0319-7L14_uncultured_actinobacterium | 0 | 0 | ASV_12965 | 0 | 0 | Acholeplasma_brassicae                           | 0 | 0 |
| ASV_21578                                           | 0.00004588 | 0.00001451 | Anaerococcus_uncultured_bacterium      | 0 | 0 | Actinobacteria_PeM15_metagenome                     | 0 | 0 | Actinobacteria_PeM15_bacterium_rJ7                  | 0 | 0 | ASV_12970 | 0 | 0 | Acholeplasma_laidlawii                           | 0 | 0 |
| Candidatus_Magasaniibacteria_Parcubacteria_group    | 0.00004588 | 0.00001451 | Anaerococcusuncultured_organism        | 0 | 0 | Actinobacteria_PeM15_sp.                            | 0 | 0 | Actinobacteria_PeM15_metagenome                     | 0 | 0 | ASV_13011 | 0 | 0 | Acholeplasma_morum                               | 0 | 0 |
| Gracilibacteria_JGI_000069-P22_uncultured_bacterium | 0.00004588 | 0.00001451 | Anaerocolumna_uncultured_bacterium     | 0 | 0 | Actinobacteria_PeM15_uncultured_soil                | 0 | 0 | Actinobacteria_PeM15_sp.                            | 0 | 0 | ASV_13022 | 0 | 0 | Acholeplasma_sp.                                 | 0 | 0 |
| Neisseriaceae_uncultured_beta                       | 0.00004588 | 0.00001451 | Anaerofilumuncultured_Anaerofilum      | 0 | 0 | Actinobacteria_PeM15uncultured_actinobacterium      | 0 | 0 | Actinobacteria_PeM15_uncultured_soil                | 0 | 0 | ASV_13091 | 0 | 0 | Acholeplasmataceae_EMP-G18_uncultured_Mollicutes | 0 | 0 |
| Saccharimonadales_wastewater_metagenome             | 0.00004588 | 0.0000000  | Anaerofustis_uncultured_bacterium      | 0 | 0 | Actinobacteria_sp.                                  | 0 | 0 | Actinobacteria_PeM15uncultured_actinobacterium      | 0 | 0 | ASV_13184 | 0 | 0 | Acholeplasmauncultured_Acholeplasmataceae        | 0 | 0 |
| Simkaniaceae_uncultured_sp.                         | 0.00004588 | 0.0000000  | Anaeroglobus_geminatus                 | 0 | 0 | Actinobacteria_uncultured_bacterium                 | 0 | 0 | Actinobacteria_sp.                                  | 0 | 0 | ASV_13191 | 0 | 0 | Achromatium_sp.                                  | 0 | 0 |

| Restorative                                  |                         |            |                                      |                         |            |                                 |                         |            |                                    |                         |            |                                                       |                         |              |                                           |                         |            |
|----------------------------------------------|-------------------------|------------|--------------------------------------|-------------------------|------------|---------------------------------|-------------------------|------------|------------------------------------|-------------------------|------------|-------------------------------------------------------|-------------------------|--------------|-------------------------------------------|-------------------------|------------|
| Assistant                                    |                         |            | Environment                          |                         |            | Operator                        |                         |            | Patient                            |                         |            | Saliva                                                |                         |              | Waterline                                 |                         |            |
| Taxon ID                                     | Mean relative abundance | Std dev    | Taxon ID                             | Mean relative abundance | Std dev    | Taxon ID                        | Mean relative abundance | Std dev    | Taxon ID                           | Mean relative abundance | Std dev    | Taxon ID                                              | Mean relative abundance | Std dev      | Taxon ID                                  | Mean relative abundance | Std dev    |
| Uncultured_Vulcanibacterium                  | 0.10941917              | 0.03535827 | Uncultured_Vulcanibacterium          | 0.10390528              | 0.02611684 | Uncultured_Vulcanibacterium     | 0.05251929              | 0.01374113 | Streptococcus_mutans               | 0.11684685              | 0.02615485 | Streptococcus_mutans                                  | 0.00670346              | 0.00049099   | ASV_211                                   | 0.041766                | 0.01102878 |
| Uncultured_Vulcanibacterium                  | 0.10124024              | 0.03319062 | Uncultured_Vulcanibacterium          | 0.0989517               | 0.0203019  | Uncultured_Vulcanibacterium     | 0.0486132               | 0.011667   | Uncultured_Vulcanibacterium        | 0.08095306              | 0.014307   | Prevotella_nigrescens                                 | 0.00309012              | 0.00011266   | ASV_413                                   | 0.0266037               | 0.00153596 |
| Schlegellella_uncultured_bacterium           | 0.023426                | 0.01299206 | Schlegellella_uncultured_bacterium   | 0.0125437               | 0.0063848  | Streptococcus_mutans            | 0.0410628               | 0.02263536 | Uncultured_Vulcanibacterium        | 0.06673392              | 0.0105523  | Leptotrichia_wadei                                    | 0.01120056              | 0.00052516   | ASV_164                                   | 0.157123                | 0.0085201  |
| Actinomyces_israelii                         | 0.00894752              | 0.00651058 | Streptococcus_mutans                 | 0.00624378              | 0.00346947 | Lactobacillus_amylovorus        | 0.0277156               | 0.01603994 | Lactobacillus_amylovorus           | 0.00827626              | 0.00047783 | Atopobium_uncultured_bacterium                        | 0.00090058              | 0.00007001   | Amb-16S-1323_uncultured_bacterium         | 0.0144191               | 0.00283803 |
| Aquisphaera_sp.                              | 0.00858034              | 0.00495386 | ASV_1901                             | 0.0042605               | 0.0024598  | Prevotella_nigrescens           | 0.0081324               | 0.00237072 | Rhodococcus_erythropolis           | 0.00812199              | 0.000455   | Solobacterium_moorei                                  | 0.0005639               | 0.00002674   | ASV_144                                   | 0.124618                | 0.0067532  |
| Adhaeribacter_uncultured_soil                | 0.00639626              | 0.00369288 | ASV_8402                             | 0.002708                | 0.0015813  | Solobacterium_moorei            | 0.0057382               | 0.00277949 | Cryptobacterium_sp.                | 0.0044375               | 0.001013   | Streptococcus_anginosus                               | 0.00047663              | 0.00004711   | Uncultured_Vulcanibacterium               | 0.00091771              | 0.00046342 |
| Aurantisolimonas_halimipatens                | 0.00514821              | 0.00297232 | ASV_8010                             | 0.00229017              | 0.0014377  | Actinomyces_israelii            | 0.004438                | 0.00252988 | Denitratisona_sp.                  | 0.00428082              | 0.0012533  | ASV_292                                               | 0.0003769               | 0.00001764   | Denitratisona_sp.                         | 0.000808                | 0.00046198 |
| Rubiniisphaeraceae_SH-PL14_metagenome        | 0.00446983              | 0.00419446 | ASV_2160                             | 0.0022824               | 0.0013177  | Lactobacillus_salivarius        | 0.0039001               | 0.0022131  | Prevotella_nigrescens              | 0.0027027               | 0.001008   | Rothia_aeria                                          | 0.0003067               | 0.00001764   | Azospira_sp.                              | 0.000754                | 0.0003631  |
| Solobacterium_moorei                         | 0.00344569              | 0.00198937 | ASV_4487                             | 0.0022824               | 0.0013177  | Rhodococcus_erythropolis        | 0.0039001               | 0.0022131  | Actinomyces_israelii               | 0.0027027               | 0.001008   | Pseudoramibacter_sp.                                  | 0.0003067               | 0.00001764   | Uncultured_Vulcanibacterium               | 0.000754                | 0.0003631  |
| Prevotella_nigrescens                        | 0.00344569              | 0.00198937 | ASV_9735                             | 0.0022824               | 0.0013177  | ASV_2108                        | 0.0028177               | 0.0016388  | Schlegellella_uncultured_bacterium | 0.004883                | 0.0025675  | Cryptobacterium_sp.                                   | 0.0002002               | 0.00001764   | C1-B045_uncultured_gamma                  | 0.0003030               | 0.0002738  |
| Defluviococcusuncultured_Defluviococcus      | 0.00327613              | 0.00189148 | ASV_9740                             | 0.0022824               | 0.0013177  | Howardella_sp.                  | 0.0020023               | 0.0011560  | ASV_14967                          | 0.0022831               | 0.0011811  | Selenomonadaceae_uncultured_Veillonellaceae_bacterium | 0.0002948               | 0.00001764   | Edaphobaculum_uncultured_Chitinophagaceae | 0.00048156              | 0.0002308  |
| Opitutaceae_uncultured_sp.                   | 0.00327613              | 0.00189148 | Methylomonadaceae_uncultured_sp.     | 0.0022824               | 0.0013177  | Jonquetella_anthropi            | 0.0011012               | 0.0007859  | Lautropia_uncultured_bacterium     | 0.0017026               | 0.0008309  | ASV_1071                                              | 0.0002328               | 0.0000344    | Obscuribacteraceae_sp.                    | 0.000191                | 0.000383   |
| Gemmatimonadaceae_uncultured_proteobacterium | 0.00312013              | 0.0018014  | ASV_10292                            | 0.0021302               | 0.0012529  | Cryptobacterium_sp.             | 0.0012003               | 0.0007643  | Actinomyces_dentalis               | 0.0015939               | 0.0008202  | Eubacterium_infirimum                                 | 0.0001707               | 0.000057E-05 | Streptococcus_mutans                      | 0.000668                | 0.0001760  |
| Chloroplast_Synura_petersenii                | 0.00296412              | 0.00171133 | Microtrichaceae_uncultured_bacterium | 0.0021302               | 0.0012529  | Lawsonella_uncultured_bacterium | 0.0012003               | 0.0007643  | Lawsonella_uncultured_bacterium    | 0.0014269               | 0.0008238  | Stomatobaculum_longum                                 | 0.0001707               | 0.000057E-05 | ASV_1777                                  | 0.00021962              | 0.0001012  |

|                                                   |                        |                        |                                            |                          |                        |                                                             |                          |                          |                                                  |                        |                          |                                                              |                           |                    |                                                    |                        |                        |
|---------------------------------------------------|------------------------|------------------------|--------------------------------------------|--------------------------|------------------------|-------------------------------------------------------------|--------------------------|--------------------------|--------------------------------------------------|------------------------|--------------------------|--------------------------------------------------------------|---------------------------|--------------------|----------------------------------------------------|------------------------|------------------------|
| Saprosiraceae_uncultured_Haliscomenobacter        | 0.0<br>029<br>641<br>2 | 0.0<br>017<br>113<br>3 | Brevundimonas_diminuta                     | 0.0<br>020<br>713<br>1   | 0.0<br>005<br>980<br>7 | Flavobacterium_metagenome                                   | 0.0<br>011<br>584<br>5   | 0.0<br>006<br>688<br>5   | Actinomycetaceae_F0332unidentified               | 0.0<br>014<br>128<br>4 | 0.0<br>008<br>157<br>0   | Campylobacter_concissus                                      | 0.0<br>001<br>552<br>1    | 8.9<br>609<br>E-05 | ASV_1862                                           | 0.0<br>015<br>087<br>7 | 0.0<br>008<br>610<br>8 |
| Sulfurifustis_sp.                                 | 0.0<br>028<br>081<br>1 | 0.0<br>016<br>212<br>6 | ASV_256                                    | 0.0<br>019<br>780<br>4   | 0.0<br>011<br>420<br>5 | Brevundimonas_diminuta                                      | 0.0<br>010<br>813<br>4   | 0.0<br>006<br>243<br>4   | Flavobacterium_terrigena                         | 0.0<br>014<br>128<br>4 | 0.0<br>008<br>157<br>0   | Howardella_sp.                                               | 0.0<br>001<br>241<br>7    | 7.1<br>687<br>E-05 | Thiodiava_uncultured_bacterium                     | 0.0<br>011<br>882<br>2 | 0.0<br>003<br>632<br>9 |
| Howardella_sp.                                    | 0.0<br>023<br>941<br>4 | 0.0<br>013<br>822<br>6 | Prevotella_nigrescens                      | 0.0<br>018<br>882<br>3   | 0.0<br>010<br>902<br>7 | Schlegella_uncultured_bacterium                             | 0.0<br>009<br>347<br>3   | 0.0<br>002<br>194<br>7   | ASV_3436                                         | 0.0<br>013<br>041<br>6 | 0.0<br>007<br>529<br>6   | Anaerococcusuncultured_organism                              | 0.0<br>001<br>161<br>5    | 6.7<br>06E-05      | Schlegella_uncultured_bacterium                    | 0.0<br>009<br>167<br>1 | 0.0<br>005<br>292<br>6 |
| Nitrososphaeraeae_uncultured_bacterium            | 0.0<br>023<br>400<br>9 | 0.0<br>013<br>510<br>5 | ASV_2820                                   | 0.0<br>018<br>348<br>6   | 0.0<br>010<br>593<br>6 | Arboricoccus_pini                                           | 0.0<br>008<br>978<br>2   | 0.0<br>005<br>183<br>6   | ASV_3803                                         | 0.0<br>012<br>679<br>3 | 0.0<br>007<br>320<br>4   | Lactobacillus_amylovorus                                     | 8.7<br>113<br>E-05        | 5.0<br>29E-05      | Prevotella_nigrescens                              | 0.0<br>004<br>594<br>9 | 0.0<br>004<br>961<br>9 |
| Amycolatopsis_sp.                                 | 0.0<br>021<br>840<br>9 | 0.0<br>012<br>609<br>8 | Chryseobacterium_uncultured_Bacteroidetes  | 0.0<br>018<br>348<br>6   | 0.0<br>010<br>593<br>6 | Intestinibacter_sp.                                         | 0.0<br>008<br>978<br>2   | 0.0<br>005<br>183<br>6   | Prevotella_oralis                                | 0.0<br>011<br>592<br>3 | 0.0<br>006<br>692<br>4   | Bulleidia_extracta                                           | 5.8<br>075<br>E-05        | 3.3<br>53E-05      | Singulisphaera_losophera_sp.                       | 0.0<br>008<br>212<br>2 | 0.0<br>004<br>741<br>3 |
| Chitinivorax_sp.                                  | 0.0<br>021<br>840<br>9 | 0.0<br>012<br>609<br>8 | Cryptobacterium_sp.                        | 0.0<br>017<br>309<br>2   | 0.0<br>009<br>593<br>5 | ASV_5309                                                    | 0.0<br>008<br>668<br>4   | 0.0<br>005<br>016<br>4   | Coprococcus_metagenome                           | 0.0<br>011<br>415<br>5 | 0.0<br>006<br>590<br>4   | Treponema_jecithinolyticum                                   | 0.0<br>005<br>075<br>E-05 | 3.3<br>53E-05      | Fibrisoma_sp.                                      | 0.0<br>007<br>639<br>3 | 0.0<br>004<br>104<br>5 |
| Rhodococcus_hoagii                                | 0.0<br>020<br>280<br>8 | 0.0<br>011<br>709<br>1 | Peptostreptococcales-Tissierellales_sp.    | 0.0<br>017<br>309<br>2   | 0.0<br>009<br>593<br>5 | Methylomonas_sp.                                            | 0.0<br>008<br>668<br>4   | 0.0<br>005<br>016<br>4   | Babeliales_sp.                                   | 0.0<br>011<br>230<br>3 | 0.0<br>006<br>483<br>8   | Dialister_microaerophilus                                    | 0.0<br>005<br>562<br>E-05 | 2.6<br>883<br>E-05 | Lactobacillus_rhamnosus                            | 0.0<br>007<br>448<br>3 | 0.0<br>004<br>300<br>3 |
| Sumeriaea_uncultured_bacterium                    | 0.0<br>020<br>280<br>8 | 0.0<br>011<br>709<br>1 | ASV_10869                                  | 0.0<br>017<br>038<br>9   | 0.0<br>009<br>038<br>9 | Fimbrimonadaceae_sp.                                        | 0.0<br>008<br>668<br>4   | 0.0<br>002<br>636<br>4   | Acetobacteraceae_uncultured_alpha_protobacterium | 0.0<br>010<br>090<br>8 | 0.0<br>003<br>418<br>5   | ASV_2084                                                     | 0.0<br>005<br>050<br>5    | 3.1<br>041<br>E-05 | ASV_1071                                           | 0.0<br>006<br>875<br>4 | 0.0<br>003<br>969<br>5 |
| Woesearchaeales_GW2011_GWC1_47_15_sp.             | 0.0<br>020<br>011<br>8 | 0.0<br>009<br>719<br>1 | Fusarium_circinatum                        | 0.0<br>016<br>737<br>7   | 0.0<br>009<br>663<br>5 | Chitinibacter_metagenome                                    | 0.0<br>004<br>008<br>3   | 0.0<br>004<br>849<br>2   | Holophagaceae_uncultured_Acidobacteria           | 0.0<br>008<br>332<br>1 | 0.0<br>010<br>804<br>6   | Campylobacter_sp.                                            | 0.0<br>005<br>050<br>5    | 3.1<br>041<br>E-05 | ASV_4516                                           | 0.0<br>006<br>875<br>4 | 0.0<br>003<br>969<br>5 |
| ASV_1071                                          | 0.0<br>020<br>279<br>8 | 0.0<br>011<br>708<br>5 | ASV_292                                    | 0.0<br>015<br>216<br>1   | 0.0<br>008<br>785<br>7 | Leptotrichia_trevisanii                                     | 0.0<br>007<br>992<br>9   | 0.0<br>004<br>614<br>7   | Listeria_sp.                                     | 0.0<br>007<br>305<br>6 | 0.0<br>014<br>217<br>9   | Prevotella_saccharolytica                                    | 0.0<br>005<br>041<br>E-05 | 1.7<br>922<br>E-05 | Lactobacillus_fermentum                            | 0.0<br>005<br>538<br>5 | 0.0<br>003<br>197<br>6 |
| Streptococcus_mutans                              | 0.0<br>019<br>340<br>9 | 0.0<br>011<br>166<br>5 | Lachnospiraceae_UCG-010uncultured_organism | 0.0<br>014<br>416<br>8   | 0.0<br>008<br>323<br>5 | Phycisphaerae_mle1-8_uncultured_bacterium                   | 0.0<br>007<br>819<br>7   | 0.0<br>004<br>514<br>7   | ASV_1208                                         | 0.0<br>006<br>158<br>5 | 0.0<br>003<br>555<br>6   | ASV_9                                                        | 0.0<br>005<br>521<br>E-05 | 8.9<br>609<br>E-06 | Actinomyces_israelii                               | 0.0<br>005<br>347<br>5 | 0.0<br>003<br>087<br>4 |
| Spirochaetaeae_uncultured_Ruditapes_philippinarum | 0.0<br>018<br>720<br>8 | 0.0<br>010<br>808<br>4 | ASV_14013                                  | 0.0<br>013<br>694<br>5   | 0.0<br>007<br>906<br>5 | SphingorhabdusSphingopyxis_sp.                              | 0.0<br>007<br>240<br>5   | 0.0<br>004<br>180<br>3   | Parasubdolobacterium_uncultured_bacterium        | 0.0<br>005<br>796<br>3 | 0.0<br>003<br>346<br>5   | 009E01-B-SD-P15_uncultured_bacterium                         | 0.0<br>000<br>0           | 0                  | ASV_800                                            | 0.0<br>004<br>821<br>4 | 0.0<br>001<br>980<br>5 |
| ASV_1837                                          | 0.0<br>018<br>651<br>4 | 0.0<br>005<br>615<br>4 | Novosphingobium_alpha_proteobacterium      | 0.0<br>013<br>694<br>5   | 0.0<br>007<br>906<br>5 | Bacillus_thermoamylovorans                                  | 0.0<br>006<br>935<br>7   | 0.0<br>004<br>004<br>3   | Leptotrichia_wadei                               | 0.0<br>005<br>084<br>1 | 0.0<br>002<br>617<br>6   | 1013-28-CG33_uncultured_soil                                 | 0.0<br>000<br>0           | 0                  | ASV_6399                                           | 0.0<br>004<br>774<br>6 | 0.0<br>002<br>756<br>6 |
| ASV_8384                                          | 0.0<br>017<br>394<br>7 | 0.0<br>010<br>042<br>8 | Peptoniphilus_sp.                          | 0.0<br>013<br>694<br>5   | 0.0<br>007<br>906<br>5 | ASV_720                                                     | 0.0<br>002<br>62<br>1    | 0.0<br>002<br>668<br>1   | Alkanibacter_metagenome                          | 0.0<br>004<br>709<br>5 | 0.0<br>002<br>002<br>719 | Abditibacterium_sp.                                          | 0.0<br>000<br>0           | 0                  | Rothia_aeria                                       | 0.0<br>004<br>306<br>5 | 0.0<br>001<br>929<br>5 |
| ASV_720                                           | 0.0<br>015<br>461<br>9 | 0.0<br>008<br>926<br>9 | Mycococcaceae_uncultured_bacterium         | 0.0<br>013<br>106<br>2   | 0.0<br>007<br>566<br>8 | Sphingobacteriales_NS11-marine_groupBacteroidetes_bacterium | 0.0<br>006<br>582<br>4   | 0.0<br>003<br>003<br>3   | ASV_6292                                         | 0.0<br>004<br>347<br>2 | 0.0<br>002<br>509<br>2   | Absconditibacteriales_(SR1)_metagenome                       | 0.0<br>000<br>0           | 0                  | ASV_363                                            | 0.0<br>003<br>255<br>8 | 0.0<br>001<br>879<br>7 |
| ASV_1571                                          | 0.0<br>018<br>928<br>2 | 0.0<br>008<br>618<br>8 | Oikopleura_metagenome                      | 0.0<br>012<br>172<br>0   | 0.0<br>007<br>028<br>8 | ASV_7050                                                    | 0.0<br>006<br>603<br>7   | 0.0<br>003<br>678<br>7   | Beijerinckiaceae_uncultured_endolithic           | 0.0<br>004<br>347<br>2 | 0.0<br>002<br>502<br>9   | Absconditibacteriales_(SR1)_uncultured_bacterium             | 0.0<br>000<br>0           | 0                  | Leptotrichia_wadei                                 | 0.0<br>002<br>864<br>7 | 0.0<br>001<br>654<br>8 |
| Lautropia_metagenome                              | 0.0<br>014<br>040<br>6 | 0.0<br>008<br>106<br>3 | Collimonas_sp.                             | 0.0<br>011<br>801<br>7   | 0.0<br>006<br>813<br>7 | Chloroplast_Cucumis_sativus                                 | 0.0<br>005<br>792<br>4   | 0.0<br>003<br>344<br>2   | SanguibacterSanguibacter_sp.                     | 0.0<br>004<br>347<br>2 | 0.0<br>002<br>509<br>9   | Absconditibacteriales_(SR1)_candidate_division               | 0.0<br>000<br>0           | 0                  | Prevotella_genomsp.                                | 0.0<br>002<br>673<br>8 | 0.0<br>001<br>543<br>7 |
| Nitrosomonadaceae_DSSD61_uncultured_bacterium     | 0.0<br>014<br>040<br>6 | 0.0<br>008<br>106<br>3 | Methyloplia_sp.                            | 0.0<br>011<br>801<br>7   | 0.0<br>006<br>813<br>7 | Varibaculum_sp.                                             | 0.0<br>005<br>502<br>8   | 0.0<br>002<br>003<br>177 | Streptococcus_sobrinus                           | 0.0<br>004<br>308<br>4 | 0.0<br>002<br>487<br>5   | Absconditibacteriales_(SR1)_sp.                              | 0.0<br>000<br>0           | 0                  | Obscuribacteraceae_metagenome                      | 0.0<br>002<br>629<br>7 | 0.0<br>001<br>518<br>2 |
| Thermomonas_sp.                                   | 0.0<br>014<br>040<br>6 | 0.0<br>008<br>106<br>3 | ASV_366                                    | 0.0<br>011<br>795<br>5   | 0.0<br>006<br>810<br>2 | Leptotrichia_wadei                                          | 0.0<br>002<br>005<br>371 | 0.0<br>002<br>722<br>6   | Pseudomonas_pertucinogena                        | 0.0<br>003<br>984<br>9 | 0.0<br>002<br>300<br>7   | Absconditibacteriales_(SR1)_SR1_bacterium                    | 0.0<br>000<br>0           | 0                  | Rhodococcus_erythropolis                           | 0.0<br>002<br>601<br>7 | 0.0<br>001<br>097<br>3 |
| Roseiflexaceae_uncultured_sp.                     | 0.0<br>012<br>562<br>8 | 0.0<br>007<br>253<br>1 | CCD24_sp.                                  | 0.0<br>010<br>651<br>3   | 0.0<br>006<br>149<br>5 | Kocuria_marina                                              | 0.0<br>005<br>280<br>7   | 0.0<br>002<br>563<br>7   | Psychrobacter_fozii                              | 0.0<br>003<br>984<br>9 | 0.0<br>002<br>300<br>7   | Absconditibacteriales_(SR1)_uncultured_candidate             | 0.0<br>000<br>0           | 0                  | Acetobacteraceae_uncultured_alpha_protobacterium   | 0.0<br>002<br>396<br>7 | 0.0<br>005<br>759<br>5 |
| Pirellula_uncultured_Planctomycetales             | 0.0<br>012<br>480<br>5 | 0.0<br>007<br>205<br>6 | Gemmatimonas_phototrophica                 | 0.0<br>010<br>651<br>3   | 0.0<br>006<br>149<br>5 | Oligoflexales_uncultured_sp.                                | 0.0<br>005<br>171<br>9   | 0.0<br>002<br>002<br>986 | Oligoflexales_uncultured_soil                    | 0.0<br>003<br>622<br>7 | 0.0<br>002<br>091<br>5   | Absconditibacteriales_(SR1)_uncultured_Epsilonproteobacteria | 0.0<br>000<br>0           | 0                  | Clostridia_vadinBB60_group_Clostridiales_bacterium | 0.0<br>002<br>291<br>8 | 0.0<br>001<br>323<br>2 |
| Rhodococcus_erythropolis                          | 0.0<br>012<br>065<br>9 | 0.0<br>006<br>563<br>9 | PirellulaPlanctomycetes_bacterium          | 0.0<br>010<br>651<br>3   | 0.0<br>006<br>149<br>5 | Acholeplasma_morum                                          | 0.0<br>004<br>923<br>5   | 0.0<br>002<br>842<br>6   | Rhynchosporium_secalis                           | 0.0<br>003<br>622<br>7 | 0.0<br>002<br>091<br>5   | Absconditibacteriales_(SR1)_uncultured_organism              | 0.0<br>000<br>0           | 0                  | Meiothermus_uncultured_bacterium                   | 0.0<br>001<br>302<br>2 | 0.0<br>001<br>031<br>3 |
| ASV_11530                                         | 0.0<br>011<br>596<br>4 | 0.0<br>006<br>695<br>2 | Persiciatella_uncultured_bacterium         | 0.0<br>009<br>441<br>6   | 0.0<br>005<br>451<br>1 | Alkanindiges_uncultured_gamma                               | 0.0<br>004<br>923<br>5   | 0.0<br>002<br>842<br>6   | ASV_14011                                        | 0.0<br>003<br>260<br>4 | 0.0<br>001<br>882<br>4   | Absconditibacteriales_(SR1)_uncultured_prokaryote            | 0.0<br>000<br>0           | 0                  | ASV_1021                                           | 0.0<br>001<br>909<br>8 | 0.0<br>001<br>102<br>6 |
| Arenicellaceae_uncultured_prokaryote              | 0.0<br>010<br>920<br>4 | 0.0<br>006<br>304<br>9 | Lawsonella_uncultured_bacterium            | 0.0<br>009<br>129<br>6   | 0.0<br>005<br>271<br>1 | ASV_1208                                                    | 0.0<br>004<br>923<br>5   | 0.0<br>002<br>842<br>6   | ASV_211                                          | 0.0<br>003<br>260<br>4 | 0.0<br>001<br>882<br>4   | ABY1_sp.                                                     | 0.0<br>000<br>0           | 0                  | Ureibacillus_sp.                                   | 0.0<br>001<br>909<br>8 | 0.0<br>001<br>102<br>6 |
| ASV_709                                           | 0.0<br>010<br>630<br>1 | 0.0<br>006<br>137<br>3 | Patescibacteria_uncultured_bacterium       | 0.0<br>009<br>129<br>6   | 0.0<br>005<br>271<br>1 | Candidatus_Buchananbacteria_metagenome                      | 0.0<br>004<br>923<br>5   | 0.0<br>002<br>842<br>6   | ASV_3256                                         | 0.0<br>003<br>260<br>4 | 0.0<br>001<br>882<br>4   | Acanthopleuribacterium_uncultured_bacterium                  | 0.0<br>000<br>0           | 0                  | Streptococcus_sobrinus                             | 0.0<br>001<br>718<br>8 | 0.0<br>005<br>805<br>5 |
| Peptoniphilus_duerdenii                           | 0.0<br>010<br>630<br>1 | 0.0<br>006<br>137<br>3 | Peptoniphilus_uninimassiliensis            | 0.0<br>009<br>129<br>6   | 0.0<br>005<br>271<br>1 | Parasutterella_uncultured_organism                          | 0.0<br>004<br>923<br>5   | 0.0<br>002<br>842<br>6   | Gastranaerophilales_uncultured_cyanobacterium    | 0.0<br>003<br>260<br>4 | 0.0<br>001<br>882<br>4   | Acetitomaculum_uncultured_bacterium                          | 0.0<br>000<br>0           | 0                  | Leptotrichiaceae_uncultured_marine_metagenome      | 0.0<br>001<br>627<br>9 | 0.0<br>005<br>905<br>5 |
| Saccharimonadales_TMfauncultured_compact          | 0.0<br>009<br>663<br>7 | 0.0<br>005<br>579<br>3 | ASV_720                                    | 0.0<br>007<br>863<br>1   | 0.0<br>004<br>540<br>1 | ASV_709                                                     | 0.0<br>001<br>449<br>7   | 0.0<br>001<br>669<br>4   | Brevundimonas_diminuta                           | 0.0<br>002<br>997<br>2 | 0.0<br>001<br>730<br>4   | Acetitomaculum_uncultured_rumen                              | 0.0<br>000<br>0           | 0                  | Prevotella_aurantiaca                              | 0.0<br>001<br>626<br>9 | 0.0<br>005<br>905<br>5 |
| Chitinophagales_37-13_metagenome                  | 0.0<br>009<br>360<br>4 | 0.0<br>005<br>404<br>2 | Fibrobacteraceae_uncultured_bacterium      | 0.0<br>007<br>608<br>5   | 0.0<br>004<br>392<br>5 | Cloacibacterium_sp.                                         | 0.0<br>004<br>362<br>8   | 0.0<br>002<br>518<br>8   | Flavobacterium_aquatile                          | 0.0<br>002<br>898<br>1 | 0.0<br>001<br>673<br>2   | Acetitomaculum_sp.                                           | 0.0<br>000<br>0           | 0                  | ASV_366                                            | 0.0<br>001<br>502<br>7 | 0.0<br>005<br>757<br>5 |
| Neisseriaceae_uncultured_bacterium                | 0.0<br>009<br>360<br>4 | 0.0<br>005<br>404<br>2 | Rhodospirillales_uncultured_protobacterium | 0.0<br>007<br>608<br>5   | 0.0<br>004<br>392<br>5 | Eikenella_sp.                                               | 0.0<br>004<br>362<br>8   | 0.0<br>002<br>518<br>8   | Microsillaceae_uncultured_Flexibacteraceae       | 0.0<br>002<br>898<br>1 | 0.0<br>001<br>673<br>2   | Acetivibrio_uncultured_bacterium                             | 0.0<br>000<br>0           | 0                  | Microsillaceae_uncultured_Candidatus               | 0.0<br>001<br>355<br>7 | 0.0<br>005<br>757<br>5 |
| ASV_13977                                         | 0.0<br>008<br>697<br>3 | 0.0<br>005<br>021<br>4 | Lactobacillus_vaginalis                    | 0.0<br>004<br>007<br>081 | 0.0<br>004<br>088<br>2 | ASV_1071                                                    | 0.0<br>004<br>250<br>9   | 0.0<br>002<br>454<br>3   | Rhodobacteraceae_uncultured_Amaricoccus          | 0.0<br>002<br>809<br>8 | 0.0<br>001<br>622<br>3   | Acetonaerobium_uncultured_bacterium                          | 0.0<br>000<br>0           | 0                  | Howardella_sp.                                     | 0.0<br>001<br>336<br>9 | 0.0<br>005<br>905<br>5 |
| Jatrophihabits_uncultured_bacterium               | 0.0<br>008<br>005      | 0.0<br>005             | ASV_363                                    | 0.0<br>006               | 0.0<br>003             | Tepidimonas_sp.                                             | 0.0<br>003               | 0.0<br>002               | Rothia_kristinae                                 | 0.0<br>002             | 0.0<br>001               | Acetobacter_sp.                                              | 0.0<br>000                | 0                  | ASV_17763                                          | 0.0<br>001             | 0.0<br>158             |

|                                                 |                        |                        |                                                |                        |                        |                                                     |                        |                        |                                                  |                        |                         |                                                    |   |   |                                           |                              |                        |
|-------------------------------------------------|------------------------|------------------------|------------------------------------------------|------------------------|------------------------|-----------------------------------------------------|------------------------|------------------------|--------------------------------------------------|------------------------|-------------------------|----------------------------------------------------|---|---|-------------------------------------------|------------------------------|------------------------|
|                                                 | 697<br>3               | 021<br>4               |                                                | 553<br>1               | 783<br>4               |                                                     | 803<br>4               | 195<br>9               |                                                  | 809<br>8               | 622<br>3                |                                                    |   |   | 145<br>9                                  | E-<br>05                     |                        |
| Pedospaeraceae_uncultured_metagenome            | 0.0<br>008<br>697<br>3 | 0.0<br>005<br>021<br>4 | Opitulateae_IMCC26134.sp.                      | 0.0<br>006<br>553<br>1 | 0.0<br>003<br>783<br>4 | ASV_14953                                           | 0.0<br>003<br>761<br>3 | 0.0<br>002<br>171<br>6 | Niastella.sp.                                    | 0.0<br>002<br>622<br>5 | 0.0<br>001<br>514<br>1  | Acetobacteraceae.sp.                               | 0 | 0 | ASV_897                                   | 0.0<br>001<br>145<br>9       | 6.6<br>158<br>E-<br>05 |
| Lactobacillus_rhamnosus                         | 0.0<br>008<br>168<br>3 | 0.0<br>004<br>715<br>9 | Rhodococcus_erythropolis                       | 0.0<br>006<br>553<br>1 | 0.0<br>003<br>783<br>4 | DEV008_uncultured_Verrucumicrobia                   | 0.0<br>003<br>761<br>3 | 0.0<br>002<br>171<br>6 | Rothia_aeria                                     | 0.0<br>002<br>535<br>9 | 0.0<br>001<br>464<br>1  | Acetobacteraceae_uncultured_bacterium              | 0 | 0 | Mitochondria_Eukaryota.sp.                | 0.0<br>001<br>145<br>9       | 6.6<br>158<br>E-<br>05 |
| ASV_18478                                       | 0.0<br>007<br>800<br>3 | 0.0<br>004<br>503<br>5 | Saccharimonadalesuncultured_Chloroflexi        | 0.0<br>006<br>553<br>1 | 0.0<br>003<br>783<br>4 | Eggerthellaceae_DNF00899_uncultured_actinobacterium | 0.0<br>003<br>761<br>3 | 0.0<br>002<br>171<br>6 | ASV_1071                                         | 0.0<br>002<br>435<br>2 | 0.0<br>001<br>406<br>1  | Acetobacteraceae_uncultured_metagenome             | 0 | 0 | Pedomicrobium.sp.                         | 0.0<br>001<br>145<br>9       | 6.6<br>158<br>E-<br>05 |
| Caenarcniphilales_uncultured_cyanobacterium     | 0.0<br>007<br>800<br>3 | 0.0<br>004<br>503<br>5 | Actinomyces_israelii                           | 0.0<br>006<br>294<br>3 | 0.0<br>003<br>634<br>7 | Luteolibacter_arcticus                              | 0.0<br>003<br>761<br>3 | 0.0<br>002<br>171<br>6 | ASV_12623                                        | 0.0<br>002<br>060<br>5 | 0.0<br>001<br>189<br>7  | Acetobacteraceae_uncultured_sp.                    | 0 | 0 | ASV_7533                                  | 8.7<br>656<br>05<br>E-<br>05 | 5.0<br>608<br>E-<br>05 |
| Eubacterium_ruminantium_group.sp.               | 0.0<br>007<br>800<br>3 | 0.0<br>004<br>503<br>5 | Ruminococcus_gnavus_group.sp.                  | 0.0<br>006<br>294<br>3 | 0.0<br>003<br>634<br>7 | Alistipes.sp.                                       | 0.0<br>003<br>291<br>2 | 0.0<br>001<br>900<br>2 | Chloroplast_uncultured_bacillariophyte           | 0.0<br>002<br>060<br>5 | 0.0<br>001<br>189<br>7  | Acetobacteraceae_uncultured_alpha_proteobacterium  | 0 | 0 | ASV_2103                                  | 7.6<br>393<br>05<br>E-<br>05 | 4.4<br>105<br>E-<br>05 |
| Exiguobacterium_undae                           | 0.0<br>007<br>800<br>3 | 0.0<br>004<br>503<br>5 | Oligoflexus_uncultured_delta                   | 0.0<br>006<br>086<br>4 | 0.0<br>003<br>514<br>7 | Gammaproteobacteria_CHAB-XI-27_uncultured_bacterium | 0.0<br>003<br>291<br>2 | 0.0<br>001<br>900<br>2 | Serpenticella.sp.                                | 0.0<br>001<br>811<br>3 | 0.0<br>001<br>045<br>5  | Acetobacterium.sp.                                 | 0 | 0 | ASV_4143                                  | 7.6<br>393<br>05<br>E-<br>05 | 4.4<br>105<br>E-<br>05 |
| Novosphingobium_capsulatum                      | 0.0<br>007<br>800<br>3 | 0.0<br>004<br>503<br>5 | Chloroplast_Virgulinala_fragilis               | 0.0<br>005<br>507<br>5 | 0.0<br>003<br>179<br>7 | Lachnospiraceae_A2.sp.                              | 0.0<br>003<br>291<br>2 | 0.0<br>001<br>900<br>2 | Ferribacterium_uncultured_bacterium              | 0.0<br>001<br>685<br>9 | 9.7<br>335<br>E-<br>05  | Acetothermia_uncultured_bacterium                  | 0 | 0 | Desulfomonile.sp.                         | 6.7<br>787<br>05<br>E-<br>05 | 3.9<br>137<br>E-<br>05 |
| Arcobacteraceae_uncultured_sp.                  | 0.0<br>007<br>731      | 0.0<br>004<br>463<br>5 | Planctomycetes_uncultured_Planctomycetaceae    | 0.0<br>005<br>507<br>5 | 0.0<br>003<br>179<br>7 | Thermodesulfobionia_uncultured_bacterium            | 0.0<br>003<br>291<br>2 | 0.0<br>001<br>900<br>2 | Leifsonia.sp.                                    | 0.0<br>001<br>685<br>9 | 9.7<br>335<br>E-<br>05  | Acholeplasma_uncultured_bacterium                  | 0 | 0 | Angustibacter_uncultured_bacterium        | 6.2<br>611<br>05<br>E-<br>05 | 3.6<br>149<br>E-<br>05 |
| Blastocatella_uncultured_Acidobacteria          | 0.0<br>007<br>731      | 0.0<br>004<br>463<br>5 | Roseiflexaceae_uncultured_Chloroflexi          | 0.0<br>005<br>507<br>5 | 0.0<br>003<br>179<br>7 | ASV_12280                                           | 0.0<br>003<br>185<br>8 | 0.0<br>001<br>839<br>3 | Mitochondria_Eukaryota.sp.                       | 0.0<br>001<br>685<br>9 | 9.7<br>335<br>E-<br>05  | Acholeplasma_axanthum                              | 0 | 0 | ASV_3215                                  | 6.2<br>611<br>05<br>E-<br>05 | 3.6<br>149<br>E-<br>05 |
| Lactobacillus_amylovorus                        | 0.0<br>007<br>731      | 0.0<br>004<br>463<br>5 | Solobacterium_moorei                           | 0.0<br>005<br>507<br>5 | 0.0<br>003<br>179<br>7 | ASV_12284                                           | 0.0<br>003<br>185<br>8 | 0.0<br>001<br>839<br>3 | Kocuria_marina                                   | 0.0<br>001<br>498<br>6 | 8.6<br>521<br>E-<br>05  | Acholeplasma_brassicae                             | 0 | 0 | ASV_5620                                  | 6.2<br>611<br>05<br>E-<br>05 | 3.6<br>149<br>E-<br>05 |
| ASV_16023                                       | 0.0<br>006<br>764<br>6 | 0.0<br>003<br>905<br>5 | Agitococcus_lubricus_group.sp.                 | 0.0<br>005<br>242<br>5 | 0.0<br>003<br>026<br>7 | Candidatus_Berkiella_Ectothiorhodospira.sp.         | 0.0<br>003<br>185<br>8 | 0.0<br>001<br>839<br>3 | ASV_19805                                        | 0.0<br>001<br>449<br>1 | 8.3<br>662<br>E-<br>05  | Acholeplasma_laidlawii                             | 0 | 0 | Brevundimonas_diminuta                    | 5.7<br>295<br>05<br>E-<br>05 | 3.3<br>079<br>E-<br>05 |
| Bacteroidetes_vadinHA17_uncultured_bacterium    | 0.0<br>006<br>764<br>6 | 0.0<br>003<br>905<br>5 | ASV_1592                                       | 0.0<br>005<br>242<br>5 | 0.0<br>003<br>026<br>7 | Rothia_aeria                                        | 0.0<br>003<br>185<br>8 | 0.0<br>001<br>839<br>3 | Candidatus_Kaiserbacteria_groundwater_metagenome | 0.0<br>001<br>449<br>1 | 8.3<br>662<br>E-<br>05  | Acholeplasma_morum                                 | 0 | 0 | Cellvibrio_uncultured_Cellvibrio          | 5.7<br>295<br>05<br>E-<br>05 | 3.3<br>079<br>E-<br>05 |
| Propioniciclavula_metagenome                    | 0.0<br>006<br>764<br>6 | 0.0<br>003<br>905<br>5 | Candidatus_Uhrbacteria.sp.                     | 0.0<br>005<br>242<br>5 | 0.0<br>003<br>026<br>7 | Cellvibrio_uncultured_Cellvibrio                    | 0.0<br>003<br>039<br>2 | 9.4<br>873<br>E-<br>05 | Saccharimonadalesuncultured_candidate            | 0.0<br>001<br>449<br>1 | 8.3<br>662<br>E-<br>05  | Acholeplasma.sp.                                   | 0 | 0 | Actinomycetaceae_uncultured_rumen         | 5.4<br>229<br>05<br>E-<br>05 | 3.1<br>309<br>E-<br>05 |
| Peptostreptococcus_uncultured_organism          | 0.0<br>006<br>290<br>5 | 0.0<br>003<br>631<br>8 | Macellibacteroides.sp.                         | 0.0<br>005<br>242<br>5 | 0.0<br>003<br>026<br>7 | Slackia_exigua                                      | 0.0<br>002<br>5<br>2   | 0.0<br>001<br>679<br>2 | Providencia.sp.                                  | 0.0<br>001<br>311<br>3 | 7.5<br>705<br>E-<br>05  | Acholeplasmataceae_EMP-G18_uncultured_Mollicutes   | 0 | 0 | Alphaproteobacteria_uncultured_metagenome | 5.4<br>229<br>05<br>E-<br>05 | 3.1<br>309<br>E-<br>05 |
| Actinobacteria_uncultured_bacterium             | 0.0<br>006<br>240<br>3 | 0.0<br>003<br>602<br>8 | Oligoflexales_uncultured_soil                  | 0.0<br>005<br>242<br>5 | 0.0<br>003<br>026<br>7 | Anaerococcus_prevotii                               | 0.0<br>002<br>2<br>1   | 0.0<br>001<br>672<br>1 | ASV_17766                                        | 0.0<br>001<br>123<br>9 | 6.4<br>89E-<br>-05      | Acholeplasmauncultured_Acholeplasmataceae          | 0 | 0 | ASV_346                                   | 5.4<br>229<br>05<br>E-<br>05 | 3.1<br>309<br>E-<br>05 |
| Candidatus_Uhrbacteria_uncultured_Parcubacteria | 0.0<br>006<br>240<br>3 | 0.0<br>003<br>602<br>8 | Gaiellales_uncultured_microorganism            | 0.0<br>004<br>720<br>7 | 0.0<br>002<br>026<br>5 | ASV_13091                                           | 0.0<br>002<br>002<br>2 | 0.0<br>001<br>672<br>1 | Howardella.sp.                                   | 0.0<br>001<br>123<br>9 | 6.4<br>89E-<br>-05      | Achromatium.sp.                                    | 0 | 0 | Clostridioides.sp.                        | 5.4<br>229<br>05<br>E-<br>05 | 3.1<br>309<br>E-<br>05 |
| Planctomycetes_uncultured_metagenome            | 0.0<br>006<br>240<br>3 | 0.0<br>003<br>602<br>8 | Illumatobacteraceae_uncultured_actinobacterium | 0.0<br>004<br>720<br>7 | 0.0<br>002<br>026<br>5 | Bdellovibrionaceae_OM27_gladeuncultured_delta       | 0.0<br>002<br>896<br>2 | 0.0<br>001<br>672<br>1 | I-8_uncultured_bacterium                         | 0.0<br>001<br>123<br>9 | 6.4<br>89E-<br>-05      | Acidaminobacter_uncultured_bacterium               | 0 | 0 | Luteolibacter_algae                       | 5.4<br>229<br>05<br>E-<br>05 | 3.1<br>309<br>E-<br>05 |
| Gemmatimonas_uncultured_soil                    | 0.0<br>005<br>798<br>2 | 0.0<br>003<br>347<br>6 | Acetitomaculum_uncultured_rumen                | 0.0<br>004<br>564<br>8 | 0.0<br>002<br>635<br>5 | Tannerella_forsythia                                | 0.0<br>002<br>896<br>2 | 0.0<br>001<br>672<br>1 | Peptostreptococcales-Tissierellales.sp.          | 0.0<br>001<br>123<br>9 | 6.4<br>89E-<br>-05      | Acidaminococcaceae_uncultured_bacterium            | 0 | 0 | ASV_19760                                 | 5.0<br>089<br>05<br>E-<br>05 | 2.8<br>919<br>E-<br>05 |
| Peptoniphilus.sp.                               | 0.0<br>005<br>798<br>2 | 0.0<br>003<br>347<br>6 | Candidatus_Amesbacteria.sp.                    | 0.0<br>004<br>564<br>8 | 0.0<br>002<br>635<br>5 | Candidatus_Woesebacteria.metagenome                 | 0.0<br>002<br>821<br>7 | 0.0<br>001<br>628<br>7 | Slackia_exigua                                   | 0.0<br>001<br>123<br>9 | 6.4<br>89E-<br>-05      | Acidbacter_metagenome                              | 0 | 0 | Oligoflexus_uncultured_delta_bacterium    | 5.0<br>089<br>05<br>E-<br>05 | 2.8<br>919<br>E-<br>05 |
| Prevotella_timonensis                           | 0.0<br>005<br>798<br>2 | 0.0<br>003<br>347<br>6 | Candidatus_Paracaeibacter_uncultured_bacterium | 0.0<br>004<br>564<br>8 | 0.0<br>002<br>635<br>5 | Clostridia_vadinBB60_group.sp.                      | 0.0<br>002<br>821<br>7 | 0.0<br>001<br>628<br>7 | ASV_720                                          | 0.0<br>001<br>086<br>8 | 6.2<br>74E-<br>E-<br>05 | Acidbacter_uncultured_bacterium                    | 0 | 0 | Pseudoxanthomonas.sp.                     | 5.0<br>089<br>05<br>E-<br>05 | 2.8<br>919<br>E-<br>05 |
| Xanthomonadaceae.sp.                            | 0.0<br>004<br>831<br>9 | 0.0<br>003<br>789<br>7 | Streptobacillus_uncultured_bacterium           | 0.0<br>004<br>564<br>8 | 0.0<br>002<br>635<br>5 | Erysipelotrichaceae_uncultured_bacterium            | 0.0<br>002<br>821<br>7 | 0.0<br>001<br>628<br>7 | Bacilli_RF39_uncultured_rumen                    | 0.0<br>001<br>086<br>8 | 6.2<br>74E-<br>E-<br>05 | Acidbacter.sp.                                     | 0 | 0 | ASV_256                                   | 4.0<br>672<br>05<br>E-<br>05 | 2.3<br>482<br>E-<br>05 |
| Acholeplasma_laidlawii                          | 0.0<br>004<br>831<br>9 | 0.0<br>003<br>789<br>7 | Blastocatella_11-24_uncultured_Acidobacteria   | 0.0<br>003<br>933<br>9 | 0.0<br>002<br>271<br>2 | Spirosomaceae.sp.                                   | 0.0<br>002<br>821<br>7 | 0.0<br>001<br>628<br>7 | Saccharimonadales_TM7uncultured_Candidatus       | 0.0<br>001<br>086<br>8 | 6.2<br>74E-<br>E-<br>05 | Acidimicrobia_IMCC2-6256_metagenome                | 0 | 0 | ASV_2649                                  | 4.0<br>672<br>05<br>E-<br>05 | 2.3<br>482<br>E-<br>05 |
| ASV_18451                                       | 0.0<br>004<br>831<br>9 | 0.0<br>002<br>789<br>7 | Howardella.sp.                                 | 0.0<br>003<br>933<br>9 | 0.0<br>002<br>271<br>2 | Lactobacillus_rhamnosus                             | 0.0<br>002<br>796<br>6 | 0.0<br>001<br>614<br>6 | Chloroplast_Epiphyxis.sp.                        | 9.3<br>661<br>E-<br>05 | 5.4<br>075<br>E-<br>05  | Acidimicrobia_IMCC2-6256.sp.                       | 0 | 0 | Lysobacter.sp.                            | 4.0<br>672<br>05<br>E-<br>05 | 2.3<br>482<br>E-<br>05 |
| Candidatus_Amesbacteria_Mirogenomates_bacterium | 0.0<br>004<br>831<br>9 | 0.0<br>002<br>789<br>7 | Pedobacter_terrae                              | 0.0<br>003<br>933<br>9 | 0.0<br>002<br>271<br>2 | ASV_1592                                            | 0.0<br>002<br>821<br>7 | 0.0<br>001<br>628<br>7 | Sphingobadus.sp.                                 | 3.7<br>464<br>E-<br>05 | 2.1<br>63E-<br>-05      | Acidimicrobia_IMCC2-6256_uncultured_bacterium      | 0 | 0 | Pseudarcobacter_uncultured_Arcobacter     | 4.0<br>672<br>05<br>E-<br>05 | 2.3<br>482<br>E-<br>05 |
| Chitinophaga_terrae                             | 0.0<br>004<br>831<br>9 | 0.0<br>002<br>789<br>7 | Punicococcaceae.sp.                            | 0.0<br>003<br>933<br>9 | 0.0<br>002<br>271<br>2 | Bacillus_uncultured_bacterium                       | 0.0<br>002<br>606<br>6 | 0.0<br>001<br>504<br>9 | Candidatus_Azambacteria_uncultured_bacterium     | 3.7<br>464<br>E-<br>05 | 2.1<br>63E-<br>-05      | Acidimicrobia_IMCC2-6256_uncultured_soil           | 0 | 0 | Saccharimonadalesuncultured_Candidatus    | 4.0<br>672<br>05<br>E-<br>05 | 2.3<br>482<br>E-<br>05 |
| Leptotrichia_metagenome                         | 0.0<br>004<br>831<br>9 | 0.0<br>002<br>789<br>7 | Streptococcus_sobrinus                         | 0.0<br>003<br>933<br>9 | 0.0<br>002<br>271<br>2 | Flavobacterium_soli                                 | 0.0<br>002<br>606<br>6 | 0.0<br>001<br>504<br>9 | Flavobacterium_lindanitolerans                   | 3.7<br>464<br>E-<br>05 | 2.1<br>63E-<br>-05      | Acidimicrobia_IMCC2-6256uncultured_Aciditermonas   | 0 | 0 | SB-5_uncultured_bacterium                 | 4.0<br>672<br>05<br>E-<br>05 | 2.3<br>482<br>E-<br>05 |
| Oligoflexus_metagenome                          | 0.0<br>004<br>831<br>9 | 0.0<br>002<br>789<br>7 | ASV_709                                        | 0.0<br>003<br>931<br>9 | 0.0<br>002<br>270<br>2 | Streptococcus_sobrinus                              | 0.0<br>002<br>572<br>4 | 0.0<br>001<br>485<br>5 | Parcubacteria_uncultured_bacterium               | 3.7<br>464<br>E-<br>05 | 2.1<br>63E-<br>-05      | Acidimicrobia_IMCC2-6256uncultured_actinobacterium | 0 | 0 | ASV_292                                   | 3.8<br>196<br>05<br>E-<br>05 | 2.2<br>053<br>E-<br>05 |
| Pajarobacter_uncultured_bacterium               | 0.0<br>004<br>831<br>9 | 0.0<br>002<br>789<br>7 | Chitinophagaceae_uncultured_bacterium          | 0.0<br>003<br>931<br>9 | 0.0<br>002<br>270<br>2 | Aquicella_unidentified                              | 0.0<br>002<br>350<br>3 | 0.0<br>001<br>357<br>3 | 009E01-B-SD-P15_uncultured_bacterium             | 0                      | 0                       | Acidimicrobia_IMCC2-6256uncultured_Actinomycetales | 0 | 0 | Nocardioopsis.sp.                         | 3.8<br>196<br>05<br>E-<br>05 | 2.2<br>053<br>E-<br>05 |
| Parasediminibacterium.sp.                       | 0.0<br>004<br>831<br>9 | 0.0<br>002<br>789<br>7 | Nakamurella.sp.                                | 0.0<br>003<br>931<br>9 | 0.0<br>002<br>270<br>2 | ASV_18432                                           | 0.0<br>002<br>350<br>3 | 0.0<br>001<br>357<br>3 | 1013-28-CG33_uncultured_soil                     | 0                      | 0                       | Acidimicrobia.sp.                                  | 0 | 0 | ASV_4563                                  | 3.7<br>689<br>05<br>E-<br>05 | 2.1<br>689<br>E-<br>05 |
| Rhizorhapis_uncultured_bacterium                | 0.0<br>004<br>831<br>9 | 0.0<br>002<br>789<br>7 | Patescibacteria_WWE3.sp.                       | 0.0<br>003<br>931<br>9 | 0.0<br>002<br>270<br>2 | Candidatus_Limnoluna_uncultured_bacterium           | 0.0<br>002<br>350<br>3 | 0.0<br>001<br>357<br>3 | Abditbacterium.sp.                               | 0                      | 0                       | Acidimicrobia_uncultured_bacterium                 | 0 | 0 | Gemmata_bacterium_enrichment              | 3.7<br>689<br>05<br>E-<br>05 | 2.1<br>689<br>E-<br>05 |

|                                                   |           |           |                                                              |           |          |                                                                 |           |           |                                                              |   |   |                                                     |   |   |                                                              |            |            |
|---------------------------------------------------|-----------|-----------|--------------------------------------------------------------|-----------|----------|-----------------------------------------------------------------|-----------|-----------|--------------------------------------------------------------|---|---|-----------------------------------------------------|---|---|--------------------------------------------------------------|------------|------------|
| Romboutsia_sp.                                    | 0.0048319 | 0.002789  | Eubacterium_hallii_group_sp.                                 | 0.0031471 | 0.001817 | Gammaproteobacteria_CHAB-XI-28_uncultured_bacterium             | 0.0023508 | 0.0013573 | Absconditabacteriales_(SR1)_metagenome                       | 0 | 0 | Acidimicrobia_uncultured_actinobacterium            | 0 | 0 | Paludibaculum_sp.                                            | 3.7567E-05 | 2.1689E-05 |
| Shewanella_sp.                                    | 0.0048319 | 0.002789  | Parcubacteriauncultured_deep-sea                             | 0.0031471 | 0.001817 | Gammaproteobacteria_CHAB-XI-30_uncultured_bacterium             | 0.0023508 | 0.0013573 | Absconditabacteriales_(SR1)_uncultured_bacterium             | 0 | 0 | Acidimicrobia_uncultured_actinobacterium            | 0 | 0 | Acetobacteraceae_uncultured_sp.                              | 2.7115E-05 | 1.5655E-05 |
| Shinella_sp.                                      | 0.0048319 | 0.002789  | Polaromonas_sp.                                              | 0.0031471 | 0.001817 | Chlamydiales_cvE6Chlamydiales_bacterium                         | 0.002317  | 0.0013377 | Absconditabacteriales_(SR1)_candidate_division               | 0 | 0 | Acidimicrobia_uncultured_Acidimicrobia              | 0 | 0 | ASV_2390                                                     | 2.7115E-05 | 1.5655E-05 |
| Cryptobacterium_sp.                               | 0.0047883 | 0.0027645 | Slackia_exigua                                               | 0.0031471 | 0.001817 | Saccharimonadales_TM7_uncultured_bacterium                      | 0.002317  | 0.0013377 | Absconditabacteriales_(SR1)_sp.                              | 0 | 0 | Acidimicrobia_uncultured_actinobacterium            | 0 | 0 | Bacteroides_pyogenes                                         | 2.7115E-05 | 1.5655E-05 |
| Acetobacteraceae_sp.                              | 0.0046802 | 0.0027021 | ASV_8009                                                     | 0.0030432 | 0.001757 | Catenulispora_rubra                                             | 0.002027  | 0.0011705 | Absconditabacteriales_(SR1)_SR1_bacterium                    | 0 | 0 | Acidimicrobia_uncultured_Actinomycetales            | 0 | 0 | Candidatus_Woesebacteria_sp.                                 | 2.7115E-05 | 1.5655E-05 |
| Incertae_Sedis_sp.                                | 0.0046802 | 0.0027021 | ASV_8275                                                     | 0.0030432 | 0.001757 | ASV_256                                                         | 0.002027  | 0.0011705 | Absconditabacteriales_(SR1)_uncultured_candidate             | 0 | 0 | Acidimicrobia_uncultured_bacterium_YC-ZSS-LKJ199    | 0 | 0 | Caulobacter_metagenome                                       | 2.7115E-05 | 1.5655E-05 |
| Leeia_uncultured_bacterium                        | 0.0046802 | 0.0027021 | Candidatus_Yanofskybacteria                                  | 0.0030432 | 0.001757 | ASV_292                                                         | 0.002027  | 0.0011705 | Absconditabacteriales_(SR1)_uncultured_Epsilonproteobacteria | 0 | 0 | Acidiphilium_uncultured_bacterium                   | 0 | 0 | Flavobacteriales_NS9_marine_group_metagenome                 | 2.7115E-05 | 1.5655E-05 |
| Pedospaeraceae_uncultured_sp.                     | 0.0046802 | 0.0027021 | ASV_21722                                                    | 0.0030432 | 0.001757 | ASV_366                                                         | 0.002027  | 0.0011705 | Absconditabacteriales_(SR1)_uncultured_organism              | 0 | 0 | Acidiphilium_sp.                                    | 0 | 0 | Peredibactermicrobium                                        | 2.7115E-05 | 1.5655E-05 |
| ASV_1592                                          | 0.0044592 | 0.002451  | Bosea_sp.                                                    | 0.0030432 | 0.001757 | Candidatus_Falkowbacteria_uncultured_soil                       | 0.002027  | 0.0011705 | Absconditabacteriales_(SR1)_uncultured_prokaryote            | 0 | 0 | Acidisoema_sp.                                      | 0 | 0 | Saccharimonadales_sp.                                        | 2.7115E-05 | 1.5655E-05 |
| ASV_19746                                         | 0.0038655 | 0.0022317 | Clostridia_sp.                                               | 0.0030432 | 0.001757 | Dialister_uncultured_bacterium                                  | 0.002027  | 0.0011705 | ABY1_sp.                                                     | 0 | 0 | Acidithiobacillaceae_KCM-B-112_sp.                  | 0 | 0 | Sellimonas_sp.                                               | 2.7115E-05 | 1.5655E-05 |
| ASV_19752                                         | 0.0038655 | 0.0022317 | Acetobacteraceae_uncultured_alpha_proteobacterium            | 0.0030432 | 0.001757 | Planctomycetes_WD2101_soil_group_sp.                            | 0.002027  | 0.0011705 | Acanthopleuribacter_uncultured_bacterium                     | 0 | 0 | Acidithiobacillus_ferrooxidans                      | 0 | 0 | Gammaproteobacteria_uncultured_marine                        | 2.5045E-05 | 1.4459E-05 |
| Brevundimonas_diminuta                            | 0.0038655 | 0.0022317 | Atopobium_sp.                                                | 0.0030432 | 0.001757 | Terrimicrobiaceae_FukuN18_freshwater_group_uncultured_bacterium | 0.002027  | 0.0011705 | Acetotomaculum_uncultured_bacterium                          | 0 | 0 | Acidobacteria_bacterium                             | 0 | 0 | LD29_sp.                                                     | 2.5045E-05 | 1.4459E-05 |
| BSV26_denitrifying_bacterium                      | 0.0038655 | 0.0022317 | Candidatus_Yanofskybacteria_uncultured_organism              | 0.0030432 | 0.001757 | ASV_5084                                                        | 0.002027  | 0.0011705 | Acetotomaculum_uncultured_rumen                              | 0 | 0 | Acidobacteriaceae_(Subgroup_1)_sp.                  | 0 | 0 | ASV_1161                                                     | 1.3557E-05 | 7.7273E-06 |
| Murdochella_asaccharolytica                       | 0.0038655 | 0.0022317 | Cellvibrio_uncultured_bacterium                              | 0.0030432 | 0.001757 | Sericytochromatiumuncultured_cyanobacterium                     | 0.002027  | 0.0011705 | Acetotomaculum_sp.                                           | 0 | 0 | Acidobacteriae_Elev-16S-1166_sp.                    | 0 | 0 | ASV_3568                                                     | 1.2522E-05 | 7.2297E-06 |
| Oligoflexales_uncultured_soil                     | 0.0038655 | 0.0022317 | Deinococcus_uncultured_bacterium                             | 0.0030432 | 0.001757 | ASV_2180                                                        | 0.002027  | 0.0011705 | Acetivibrio_uncultured_bacterium                             | 0 | 0 | Acidobacteriae_Elev-16S-1166_uncultured_bacterium   | 0 | 0 | Lawsonella_uncultured_bacterium                              | 1.2522E-05 | 7.2297E-06 |
| ASV_21727                                         | 0.0031201 | 0.0018014 | Eikenella_sp.                                                | 0.0030432 | 0.001757 | Actinomycetaceae_F0332unidentified                              | 0.002027  | 0.0011705 | Acetanaerobium_uncultured_bacterium                          | 0 | 0 | Acidobacteriae_sp.                                  | 0 | 0 | Leptospira_wolfii                                            | 1.2522E-05 | 7.2297E-06 |
| Candidatus_Berkiella_unidentified_marine          | 0.003003  | 0.001801  | Omitrophia_sp.                                               | 0.0030432 | 0.001757 | Aeromicrobium_sp.                                               | 0.002027  | 0.0011705 | Acetobacter_sp.                                              | 0 | 0 | Acidocella_uncultured_bacterium                     | 0 | 0 | 009E01-B-SD-P15_uncultured_bacterium                         | 0          | 0          |
| Candidatus_Yanofskybacteria_uncultured_deep-sea   | 0.0028991 | 0.0016738 | Trabulsiella_uncultured_bacterium                            | 0.0030432 | 0.001757 | ASV_363                                                         | 0.002027  | 0.0011705 | Acetobacteraceae_sp.                                         | 0 | 0 | Acidothermus_uncultured_bacterium                   | 0 | 0 | 1013-28-CG33_uncultured_soil                                 | 0          | 0          |
| Gaiella_sp.                                       | 0.0028991 | 0.0016738 | ASV_21979                                                    | 0.0030432 | 0.001757 | Flexithrix_dorotheae                                            | 0.002027  | 0.0011705 | Acetobacteraceae_uncultured_bacterium                        | 0 | 0 | Acidothermus_sp.                                    | 0 | 0 | Abditbacterium_sp.                                           | 0          | 0          |
| Pedospaeraceae_uncultured_bacterium               | 0.0028991 | 0.0016738 | Gammaproteobacteria                                          | 0.0030432 | 0.001757 | Gallicola_uncultured_bacterium                                  | 0.002027  | 0.0011705 | Acetobacteraceae_uncultured_metagenome                       | 0 | 0 | Acidovorax_sp.                                      | 0 | 0 | Absconditabacteriales_(SR1)_metagenome                       | 0          | 0          |
| Rhodobacteraceae_sp.                              | 0.0028991 | 0.0016738 | 009E01-B-SD-P15_uncultured_bacterium                         | 0         | 0        | Kiritimatiellae_WCHB1-41_sp.                                    | 0.002027  | 0.0011705 | Acetobacteraceae_uncultured_sp.                              | 0 | 0 | Acinetobacter_metagenome                            | 0 | 0 | Absconditabacteriales_(SR1)_uncultured_bacterium             | 0          | 0          |
| Eikenella_sp.                                     | 0.0028991 | 0.0016738 | 1013-28-CG33_uncultured_soil                                 | 0         | 0        | Legionella_uncultured_bacterium                                 | 0.002027  | 0.0011705 | Acetobacterium_sp.                                           | 0 | 0 | Acinetobacter_baumannii                             | 0 | 0 | Absconditabacteriales_(SR1)_candidate_division               | 0          | 0          |
| Absconditabacteriales_(SR1)_uncultured_prokaryote | 0.0028991 | 0.0016738 | Abditbacterium_sp.                                           | 0         | 0        | Patescibacteria_CPR2_uncultured_Clostridium                     | 0.002027  | 0.0011705 | Acetothermia_uncultured_bacterium                            | 0 | 0 | Acinetobacter_kyongjensis                           | 0 | 0 | Absconditabacteriales_(SR1)_sp.                              | 0          | 0          |
| ASV_21709                                         | 0.0028991 | 0.0016738 | Absconditabacteriales_(SR1)_metagenome                       | 0         | 0        | Prevotellaceae_uncultured_Prevotella_sp.                        | 0.002027  | 0.0011705 | Acholeplasma_uncultured_bacterium                            | 0 | 0 | Acinetobacter_sp.                                   | 0 | 0 | Absconditabacteriales_(SR1)_SR1_bacterium                    | 0          | 0          |
| Bacteriovoraceae_uncultured_bacterium             | 0.0028991 | 0.0016738 | Absconditabacteriales_(SR1)_uncultured_bacterium             | 0         | 0        | Psychrobacter_sp.                                               | 0.002027  | 0.0011705 | Acholeplasma_axanthum                                        | 0 | 0 | Acinetobacter_towneri                               | 0 | 0 | Absconditabacteriales_(SR1)_uncultured_candidate             | 0          | 0          |
| Candidatus_Nomurabactria_sp.                      | 0.0028991 | 0.0016738 | Absconditabacteriales_(SR1)_candidate_division               | 0         | 0        | Sandaracinaceae_uncultured_uncultured_soil                      | 0.002027  | 0.0011705 | Acholeplasma_brassicae                                       | 0 | 0 | Acremonium_fuci                                     | 0 | 0 | Absconditabacteriales_(SR1)_uncultured_Epsilonproteobacteria | 0          | 0          |
| Ruminoclostridium_metagenome                      | 0.0028991 | 0.0016738 | Absconditabacteriales_(SR1)_sp.                              | 0         | 0        | Spirosomaceae_uncultured_metagenome                             | 0.002027  | 0.0011705 | Acholeplasma_laidlawii                                       | 0 | 0 | Actinobacillus_sp.                                  | 0 | 0 | Absconditabacteriales_(SR1)_uncultured_organism              | 0          | 0          |
| Genmatimonas_phototrophica                        | 0.0028991 | 0.0016738 | Absconditabacteriales_(SR1)_SR1_bacterium                    | 0         | 0        | Patescibacteria_CPR2_uncultured_Firmicutes                      | 0.002027  | 0.0011705 | Acholeplasma_morum                                           | 0 | 0 | Actinobacteria_0319-7L14_uncultured_actinobacterium | 0 | 0 | Absconditabacteriales_(SR1)_uncultured_prokaryote            | 0          | 0          |
| ASV_292                                           | 0.0028991 | 0.0016738 | Absconditabacteriales_(SR1)_uncultured_candidate             | 0         | 0        | Phenylobacterium_sp.                                            | 0.002027  | 0.0011705 | Acholeplasma_sp.                                             | 0 | 0 | Actinobacteria_PeM15_bacterium_tJ7                  | 0 | 0 | ABY1_sp.                                                     | 0          | 0          |
| Acidimicrobia_IMCC26256_uncultured_bacterium      | 9.388E-05 | 5.420E-05 | Absconditabacteriales_(SR1)_uncultured_Epsilonproteobacteria | 0         | 0        | Peptococcus_niger                                               | 0.002027  | 0.0011705 | Acholeplasmataceae_EMP_G18_uncultured_Mollicutes             | 0 | 0 | Actinobacteria_PeM15_metagenome                     | 0 | 0 | Acanthopleuribacter_uncultured_bacterium                     | 0          | 0          |



|                                                                       |                        |                        |                                                              |   |   |                                                            |                        |                        |                                                           |   |   |                                                                  |   |   |                                                              |   |   |
|-----------------------------------------------------------------------|------------------------|------------------------|--------------------------------------------------------------|---|---|------------------------------------------------------------|------------------------|------------------------|-----------------------------------------------------------|---|---|------------------------------------------------------------------|---|---|--------------------------------------------------------------|---|---|
| ASV_256                                                               | 8.4<br>499<br>E-<br>05 | 4.8<br>786<br>E-<br>05 | Absconditabacteriales<br>(SR1)_uncultured_or<br>ganism       | 0 | 0 | Acetobacteraceae_uncul<br>tured_alpha_proteobact<br>erium  | 0.0<br>001<br>006<br>8 | 5.8<br>127<br>E-<br>05 | Acholeplasmauncultur<br>ed_Acholeplasmatace<br>ae         | 0 | 0 | Actinobacteria_PeM15<br>sp.                                      | 0 | 0 | Acetitomaculum_unc<br>ultured_bacterium                      | 0 | 0 |
| C86_sp.                                                               | 8.4<br>499<br>E-<br>05 | 4.8<br>786<br>E-<br>05 | Absconditabacteriales<br>(SR1)_uncultured_pr<br>okaryote     | 0 | 0 | Proteiniphilum_sp.                                         | 0.0<br>001<br>006<br>8 | 5.8<br>127<br>E-<br>05 | Achromatium_sp.                                           | 0 | 0 | Actinobacteria_PeM15<br>uncultured_soil                          | 0 | 0 | Acetitomaculum_unc<br>ultured_rumen                          | 0 | 0 |
| Slackia_exigua                                                        | 8.4<br>499<br>E-<br>05 | 4.8<br>786<br>E-<br>05 | ABY1_sp.                                                     | 0 | 0 | ASV_4527                                                   | 9.4<br>034<br>E-<br>05 | 5.4<br>29E<br>-05      | Acidaminobacter_un<br>cultured_bacterium                  | 0 | 0 | Actinobacteria_PeM15<br>uncultured_actinobact<br>erium           | 0 | 0 | Acetitomaculum_sp.                                           | 0 | 0 |
| Acetobacteraceae_un<br>cultured_alpha_proteo<br>bacterium             | 5.6<br>333<br>E-<br>05 | 3.2<br>524<br>E-<br>05 | Acanthopleuribacter__<br>uncultured_bacterium                | 0 | 0 | Bacteroidales_RF16_gro<br>up_sp.                           | 9.4<br>034<br>E-<br>05 | 5.4<br>29E<br>-05      | Acidaminococcaceae_<br>uncultured_bacteriu<br>m           | 0 | 0 | Actinobacteria_sp.                                               | 0 | 0 | Acetivibrio_uncultured<br>bacterium                          | 0 | 0 |
| Cellvibrio_uncultured_<br>Cellvibrio                                  | 5.6<br>333<br>E-<br>05 | 3.2<br>524<br>E-<br>05 | Acetitomaculum_unc<br>ultured_bacterium                      | 0 | 0 | C0119_uncultured_soil                                      | 9.4<br>034<br>E-<br>05 | 5.4<br>29E<br>-05      | Acidibacter__metagen<br>ome                               | 0 | 0 | Actinobacteria_uncult<br>ured_bacterium                          | 0 | 0 | Acetoanaerobium_unc<br>ultured_bacterium                     | 0 | 0 |
| Butyrivibrio_Eubacteri<br>um_sp.                                      | 4.6<br>944<br>E-<br>05 | 2.7<br>103<br>E-<br>05 | Acetitomaculum_sp.                                           | 0 | 0 | Collinsella_sp.                                            | 9.4<br>034<br>E-<br>05 | 5.4<br>29E<br>-05      | Acidibacter_uncultur<br>ed_bacterium                      | 0 | 0 | Actinobacteria_uncult<br>ured_metagenome                         | 0 | 0 | Acetobacter_sp.                                              | 0 | 0 |
| Collimonas_sp.                                                        | 4.6<br>944<br>E-<br>05 | 2.7<br>103<br>E-<br>05 | Acetivibrio_uncultured<br>bacterium                          | 0 | 0 | Gracilibacteria__metagen<br>ome                            | 9.4<br>034<br>E-<br>05 | 5.4<br>29E<br>-05      | Acidibacter_sp.                                           | 0 | 0 | Actinobacteria_uncult<br>ured_sp.                                | 0 | 0 | Acetobacteraceae_sp.                                         | 0 | 0 |
| Solirubrobacteriales_6<br>7-<br>14_uncultured_bacte<br>rium           | 4.6<br>944<br>E-<br>05 | 2.7<br>103<br>E-<br>05 | Acetoanaerobium_unc<br>ultured_bacterium                     | 0 | 0 | Phycisphaeraeae_SM1<br>A02_metagenome                      | 9.4<br>034<br>E-<br>05 | 5.4<br>29E<br>-05      | Acidimicrobia_IMCC2<br>6256_metagenome                    | 0 | 0 | Actinobacteria_uncult<br>ured_Actinomycetales<br>bacterium       | 0 | 0 | Acetobacteraceae_un<br>cultured_bacterium                    | 0 | 0 |
| Flavobacterium_uncult<br>ured_Flavobacteriace<br>ae                   | 3.7<br>555<br>E-<br>05 | 2.1<br>683<br>E-<br>05 | Acetobacter_sp.                                              | 0 | 0 | Sphingobacteriales_env.<br>OPS_17_uncultured_soil          | 9.4<br>034<br>E-<br>05 | 5.4<br>29E<br>-05      | Acidimicrobia_IMCC2<br>6256_sp.                           | 0 | 0 | Actinobacteriota_MB-<br>A2-108_metagenome                        | 0 | 0 | Acetobacteraceae_un<br>cultured_metagenom<br>e               | 0 | 0 |
| Kiritimatiellae_WCHB<br>1-<br>41uncultured_Verruco<br>microbia        | 3.7<br>555<br>E-<br>05 | 2.1<br>683<br>E-<br>05 | Acetobacteraceae_sp.                                         | 0 | 0 | Turneriella_sp.                                            | 9.4<br>034<br>E-<br>05 | 5.4<br>29E<br>-05      | Acidimicrobia_IMCC2<br>6256_uncultured_bact<br>erium      | 0 | 0 | Actinobacteriota_MB-<br>A2-108_sp.                               | 0 | 0 | Acetobacterium_sp.                                           | 0 | 0 |
| Peptoclostridium_unc<br>ultured_organism                              | 3.7<br>555<br>E-<br>05 | 2.1<br>683<br>E-<br>05 | Acetobacteraceae_un<br>cultured_bacterium                    | 0 | 0 | WPS-<br>2hydrothermal_vent                                 | 9.4<br>034<br>E-<br>05 | 5.4<br>29E<br>-05      | Acidimicrobia_IMCC2<br>6256_uncultured_soil               | 0 | 0 | Actinobacteriota_MB-<br>A2-<br>108_uncultured_bacte<br>rium      | 0 | 0 | Acetothermia_uncult<br>ured_bacterium                        | 0 | 0 |
| Anaerovoracaceae_F<br>amily_XIII_UCG-<br>004Eubacterium_sp.           | 2.8<br>166<br>E-<br>05 | 1.6<br>262<br>E-<br>05 | Acetobacteraceae_un<br>cultured_metagenom<br>e               | 0 | 0 | Methanobacterium_flexil<br>e                               | 8.6<br>886<br>E-<br>05 | 5.0<br>164<br>E-<br>05 | Acidimicrobia_IMCC2<br>6256uncultured_Acidit<br>erimonas  | 0 | 0 | Actinobacteriota_MB-<br>A2-<br>108uncultured_actino<br>bacterium | 0 | 0 | Acholeplasma_uncult<br>ured_bacterium                        | 0 | 0 |
| Gracilibacteria_JGI_0<br>000069-<br>P22Graacilibacteria_ba<br>cterium | 2.8<br>166<br>E-<br>05 | 1.6<br>262<br>E-<br>05 | Acetobacteraceae_un<br>cultured_sp.                          | 0 | 0 | Bejerinckiacae_uncultu<br>red_uncultured_soil              | 7.8<br>306<br>E-<br>05 | 4.5<br>21E<br>-05      | Acidimicrobia_IMCC2<br>6256uncultured_actin<br>obacterium | 0 | 0 | Actinomadura_sp.                                                 | 0 | 0 | Acholeplasma_axanth<br>um                                    | 0 | 0 |
| Leptotrichia_wadei                                                    | 2.8<br>166<br>E-<br>05 | 1.6<br>262<br>E-<br>05 | Acetobacterium_sp.                                           | 0 | 0 | Niabella_uncultured_bac<br>terium                          | 7.8<br>306<br>E-<br>05 | 4.5<br>21E<br>-05      | Acidimicrobia_IMCC2<br>6256uncultured_Actin<br>omycetales | 0 | 0 | Actinomyces_uncultu<br>red_bacterium                             | 0 | 0 | Acholeplasma_brassic<br>ae                                   | 0 | 0 |
| Alphaproteobacteria_u<br>ncultured_Rhodospirill<br>aceae_bacterium    | 1.8<br>778<br>E-<br>05 | 1.0<br>841<br>E-<br>05 | Acetothermia_uncult<br>ured_bacterium                        | 0 | 0 | Geodermatophilus_sp.                                       | 6.7<br>119<br>E-<br>05 | 3.8<br>751<br>E-<br>05 | Acidimicrobia_sp.                                         | 0 | 0 | Actinomyces_dentalis                                             | 0 | 0 | Acholeplasma_laidlaw<br>ii                                   | 0 | 0 |
| Anaerovoracaceae_F<br>amily_XIII_UCG-<br>005Eubacterium_sp.           | 1.8<br>778<br>E-<br>05 | 1.0<br>841<br>E-<br>05 | Acholeplasma_uncult<br>ured_bacterium                        | 0 | 0 | Candidatus_Woesebact<br>eria_uncultured_Microg<br>enomates | 5.7<br>924<br>E-<br>05 | 3.3<br>442<br>E-<br>05 | Acidimicrobia_uncultu<br>red_bacterium                    | 0 | 0 | Actinomyces_graeveni<br>tzi                                      | 0 | 0 | Acholeplasma_morum                                           | 0 | 0 |
| Chitinophagaceae_sp.                                                  | 1.8<br>778<br>E-<br>05 | 1.0<br>841<br>E-<br>05 | Acholeplasma_axanth<br>um                                    | 0 | 0 | Acetoanaerobium_uncult<br>ured_bacterium                   | 5.5<br>933<br>E-<br>05 | 3.2<br>293<br>E-<br>05 | Acidimicrobia_uncultu<br>red_metagenome                   | 0 | 0 | Actinomyces_israelii                                             | 0 | 0 | Acholeplasma_sp.                                             | 0 | 0 |
| Oligoflexia_0319-<br>6G20_marine__metag<br>enome                      | 1.8<br>778<br>E-<br>05 | 1.0<br>841<br>E-<br>05 | Acholeplasma_brassic<br>ae                                   | 0 | 0 | Acidisona_sp.                                              | 5.5<br>933<br>E-<br>05 | 3.2<br>293<br>E-<br>05 | Acidimicrobia_uncultu<br>red_sp.                          | 0 | 0 | Actinomyces_sp.                                                  | 0 | 0 | Acholeplasmataceae_<br>EMP-<br>G18_uncultured_Molli<br>cutes | 0 | 0 |
| Tyzzerella_sp.                                                        | 1.8<br>778<br>E-<br>05 | 1.0<br>841<br>E-<br>05 | Acholeplasma_laidlaw<br>ii                                   | 0 | 0 | Bifidobacteriaceae_sp.                                     | 5.5<br>933<br>E-<br>05 | 3.2<br>293<br>E-<br>05 | Acidimicrobia_uncultu<br>red_Acidimicrobia                | 0 | 0 | Actinomyces_unidentif<br>ied                                     | 0 | 0 | Acholeplasmauncultur<br>ed_Acholeplasmatace<br>ae            | 0 | 0 |
| 009E01-B-SD-<br>P15_uncultured_bact<br>erium                          | 0                      | 0                      | Acholeplasma_morum                                           | 0 | 0 | Methylomonas_uncultur<br>ed_bacterium                      | 5.5<br>933<br>E-<br>05 | 3.2<br>293<br>E-<br>05 | Acidimicrobia_uncultu<br>red_actinobacterium              | 0 | 0 | Actinomycetaceae_F0<br>332_uncultured_bacte<br>rium              | 0 | 0 | Achromatium_sp.                                              | 0 | 0 |
| 1013-28-<br>CG33_uncultured_so<br>il                                  | 0                      | 0                      | Acholeplasma_sp.                                             | 0 | 0 | ASV_6240                                                   | 4.7<br>017<br>E-<br>05 | 2.7<br>145<br>E-<br>05 | Acidimicrobia_uncultu<br>red_Actinomycetales              | 0 | 0 | Actinomycetaceae_F0<br>332unidentified                           | 0 | 0 | Acidaminobacter_un<br>cultured_bacterium                     | 0 | 0 |
| Abditbacterium_sp.                                                    | 0                      | 0                      | Acholeplasmataceae_<br>EMP-<br>G18_uncultured_Molli<br>cutes | 0 | 0 | ASV_20280                                                  | 4.4<br>746<br>E-<br>05 | 2.5<br>834<br>E-<br>05 | Acidimicrobia_uncultu<br>red_bacterium_YC-<br>ZSS-LKJ199  | 0 | 0 | Actinomycetaceae_un<br>cultured_bacterium                        | 0 | 0 | Acidaminococcaceae_<br>uncultured_bacteriu<br>m              | 0 | 0 |
| Absconditabacteriales<br>(SR1)_metagenom<br>e                         | 0                      | 0                      | Acholeplasmauncultur<br>ed_Acholeplasmatace<br>ae            | 0 | 0 | ASV_20283                                                  | 4.4<br>746<br>E-<br>05 | 2.5<br>834<br>E-<br>05 | Acidiphilium_uncultur<br>ed_bacterium                     | 0 | 0 | Actinomycetaceae_un<br>cultured_metagenom<br>e                   | 0 | 0 | Acidibacter__metagen<br>ome                                  | 0 | 0 |
| Absconditabacteriales<br>(SR1)_uncultured_b<br>acterium               | 0                      | 0                      | Achromatium_sp.                                              | 0 | 0 | Campylobacter_concisu<br>s                                 | 4.4<br>746<br>E-<br>05 | 2.5<br>834<br>E-<br>05 | Acidiphilium_sp.                                          | 0 | 0 | Actinomycetaceae_un<br>cultured_rumen                            | 0 | 0 | Acidibacter_uncultu<br>red_bacterium                         | 0 | 0 |
| Absconditabacteriales<br>(SR1)_candidate_div<br>ision                 | 0                      | 0                      | Acidaminobacter_un<br>cultured_bacterium                     | 0 | 0 | Cellulosimicrobium_sp.                                     | 4.4<br>746<br>E-<br>05 | 2.5<br>834<br>E-<br>05 | Acidisona_sp.                                             | 0 | 0 | Actinomycetaceae_un<br>cultured_sp.                              | 0 | 0 | Acidibacter_sp.                                              | 0 | 0 |
| Absconditabacteriales<br>(SR1)_sp.                                    | 0                      | 0                      | Acidaminococcaceae_<br>uncultured_bacteriu<br>m              | 0 | 0 | Chloroplast_Juniperus_v<br>irginiana                       | 4.4<br>746<br>E-<br>05 | 2.5<br>834<br>E-<br>05 | Acidithiobacillaceae_K<br>CM-B-112_sp.                    | 0 | 0 | Actinomycetospora_s<br>p.                                        | 0 | 0 | Acidimicrobia_IMCC2<br>6256_metagenome                       | 0 | 0 |
| Absconditabacteriales<br>(SR1)_SR1_bacteriu<br>m                      | 0                      | 0                      | Acidibacter__metagen<br>ome                                  | 0 | 0 | Corynebacterium_sp.                                        | 4.4<br>746<br>E-<br>05 | 2.5<br>834<br>E-<br>05 | Acidithiobacillus_ferro<br>oxidans                        | 0 | 0 | Actinoplanes_garbad<br>nensis                                    | 0 | 0 | Acidimicrobia_IMCC2<br>6256_sp.                              | 0 | 0 |
| Absconditabacteriales<br>(SR1)_uncultured_ca<br>ndidate               | 0                      | 0                      | Acidibacter_uncultu<br>red_bacterium                         | 0 | 0 | Hydrogenophilus_sp.                                        | 4.4<br>746<br>E-<br>05 | 2.5<br>834<br>E-<br>05 | Acidobacteria_bacteri<br>um                               | 0 | 0 | Actinoplanes_sp.                                                 | 0 | 0 | Acidimicrobia_IMCC2<br>6256_uncultured_bact<br>erium         | 0 | 0 |
| Absconditabacteriales<br>(SR1)_uncultured_E<br>psilonproteobacteria   | 0                      | 0                      | Acidibacter_sp.                                              | 0 | 0 | Oligoflexia_0319-<br>6G20_uncultured_soil                  | 4.4<br>746<br>E-<br>05 | 2.5<br>834<br>E-<br>05 | Acidobacteriaceae_(S<br>ubgroup_1)_sp.                    | 0 | 0 | Actinotalea_sp.                                                  | 0 | 0 | Acidimicrobia_IMCC2<br>6256_uncultured_soil                  | 0 | 0 |
| Absconditabacteriales<br>(SR1)_uncultured_or<br>ganism                | 0                      | 0                      | Acidimicrobia_IMCC2<br>6256_metagenome                       | 0 | 0 | Spirosoma_uncultured_<br>bacterium                         | 4.4<br>746<br>E-<br>05 | 2.5<br>834<br>E-<br>05 | Acidobacteriaceae_Elev-<br>16S-1166_sp.                   | 0 | 0 | Actinotignum_sp.                                                 | 0 | 0 | Acidimicrobia_IMCC2<br>6256uncultured_Acidit<br>erimonas     | 0 | 0 |

|                                               |   |   |                                                       |   |   |                                                    |                        |                        |                                                           |   |   |                                    |   |   |                                                       |   |   |
|-----------------------------------------------|---|---|-------------------------------------------------------|---|---|----------------------------------------------------|------------------------|------------------------|-----------------------------------------------------------|---|---|------------------------------------|---|---|-------------------------------------------------------|---|---|
| ABY1_sp.                                      | 0 | 0 | Acidimicrobia_IMCC2<br>6256_sp.                       | 0 | 0 | Candidatus_BabelaCandidatus_Babela                 | 3.3<br>56E<br>-05      | 1.9<br>376<br>E-<br>05 | Acidobacteriae_Elev-<br>16S-<br>1166_uncultured_bacterium | 0 | 0 | Adhaeribacter__meta<br>genome      | 0 | 0 | Acidimicrobia_IMCC2<br>6256uncultured_actinobacterium | 0 | 0 |
| Acanthopleuribacter__<br>uncultured_bacterium | 0 | 0 | Acidimicrobia_IMCC2<br>6256_uncultured_bacterium      | 0 | 0 | Candidatus_Falkowbacteria_uncultured_anaerobic     | 3.3<br>56E<br>-05      | 1.9<br>376<br>E-<br>05 | Acidobacteriae sp.                                        | 0 | 0 | Adhaeribacter__uncultured_soil     | 0 | 0 | Acidimicrobia_IMCC2<br>6256uncultured_Actinomyetales  | 0 | 0 |
| Acetitomaculum__uncultured_bacterium          | 0 | 0 | Acidimicrobia_IMCC2<br>6256_uncultured_soil           | 0 | 0 | Hyphomicrobium_vulgaris                            | 3.3<br>56E<br>-05      | 1.9<br>376<br>E-<br>05 | Acidocella_uncultured_bacterium                           | 0 | 0 | Adhaeribacter sp.                  | 0 | 0 | Acidimicrobia sp.                                     | 0 | 0 |
| Acetitomaculum__uncultured_rumen              | 0 | 0 | Acidimicrobia_IMCC2<br>6256uncultured_Acidithermonas  | 0 | 0 | Legionella_beliardensis                            | 3.3<br>56E<br>-05      | 1.9<br>376<br>E-<br>05 | Acidotherrmus_uncultured_bacterium                        | 0 | 0 | Advenella sp.                      | 0 | 0 | Acidimicrobia_uncultured_bacterium                    | 0 | 0 |
| Acetitomaculum sp.                            | 0 | 0 | Acidimicrobia_IMCC2<br>6256uncultured_actinobacterium | 0 | 0 | Solirubrobacterales_67-14_uncultured_Rubrobacteria | 3.3<br>56E<br>-05      | 1.9<br>376<br>E-<br>05 | Acidotherrmus sp.                                         | 0 | 0 | Aenigmarchaeales sp.               | 0 | 0 | Acidimicrobia_uncultured_metagenome                   | 0 | 0 |
| Acetivibrio_uncultured_bacterium              | 0 | 0 | Acidimicrobia_IMCC2<br>6256uncultured_Actinomyetales  | 0 | 0 | Turicella_uncultured_bacterium                     | 3.3<br>56E<br>-05      | 1.9<br>376<br>E-<br>05 | Acidovorax sp.                                            | 0 | 0 | Aenigmarcheota sp.                 | 0 | 0 | Acidimicrobia_uncultured_sp.                          | 0 | 0 |
| Acetoanaerobium_uncultured_bacterium          | 0 | 0 | Acidimicrobia sp.                                     | 0 | 0 | Oligoflexales_uncultured_soil                      | 2.8<br>96E<br>-05      | 1.6<br>721<br>E-<br>05 | Acinetobacter__metagenome                                 | 0 | 0 | Aequorivita sp.                    | 0 | 0 | Acidimicrobia_uncultured_Acidimicrobia                | 0 | 0 |
| Acetobacter sp.                               | 0 | 0 | Acidimicrobia_uncultured_bacterium                    | 0 | 0 | Aerococcus sp.                                     | 2.2<br>373<br>E-<br>05 | 1.2<br>917<br>E-<br>05 | Acinetobacter_baumannii                                   | 0 | 0 | Aerococcaceae sp.                  | 0 | 0 | Acidimicrobia_uncultured_actinobacterium              | 0 | 0 |
| Acetobacteraceae_uncultured_bacterium         | 0 | 0 | Acidimicrobia_uncultured_metagenome                   | 0 | 0 | Parcubacteria_metagenome                           | 2.2<br>373<br>E-<br>05 | 1.2<br>917<br>E-<br>05 | Acinetobacter_kyonggiensis                                | 0 | 0 | Aerococcaceae_uncultured_bacterium | 0 | 0 | Acidimicrobia_uncultured_Actinomyetales               | 0 | 0 |
